# Supplementary material for: Nucleo-cytoplasmic shuttling of splicing factor SRSF1 is required for development and cilia function
Source: eLife. 2021 Aug 2;10:e65104. doi: 10.7554/eLife.65104 (PMC8352595; doi:10.7554/eLife.65104)
Supplement: Figure 4—figure supplement 1—source data 1. [file elife-65104-fig4-figsupp1-data1.xlsx]

## Sheet: Table Legend
LFQ intensity 75-SRSF1HOMP22	LFQ intensity 76-SRSF1HOMP22	LFQ intensity 62-SRSF1HOMP23	LFQ intensity 78-SRSF1WTP22	LFQ intensity 79-SRSF1WTP22	LFQ intensity 63-SRSF1WTP23	LFQ intensity 66-SRSF1WTP23	log10 p	log 2 fc	Gene names	Fasta headers
46250000	62916000	42836000	53302000	64948000	56408000	67457000	0.71566	-0.256565	2002-03-01	sp|Q922Q1|MARC2_MOUSE Mitochondrial amidoxime reducing component 2 OS=Mus musculus OX=10090 GN=Mtarc2 PE=1 SV=1
217860000	213690000	227000000	206280000	237790000	187320000	258570000	0.0543318	-0.01941	2002-09-01	sp|P42208|SEPT2_MOUSE Septin-2 OS=Mus musculus OX=10090 GN=Septin2 PE=1 SV=2
66812000	75406000	155570000	112840000	38366000	87239000	67664000	0.31519	0.375278	2005-03-01	sp|Q3KNM2|MARH5_MOUSE E3 ubiquitin-protein ligase MARCHF5 OS=Mus musculus OX=10090 GN=Marchf5 PE=1 SV=1
9814700	9047500	5698300	8368200	7252400	5088700	10848000	0.0589775	0.0534037	2005-09-01	sp|Q9Z2Q6|SEPT5_MOUSE Septin-5 OS=Mus musculus OX=10090 GN=Septin5 PE=1 SV=2
174660	174660	174660	174660	174660	4313800	3695600	0.687011	-3.58066	2006-03-01	sp|Q6ZQ89|MARH6_MOUSE E3 ubiquitin-protein ligase MARCHF6 OS=Mus musculus OX=10090 GN=Marchf6 PE=2 SV=2
7551600	10938000	9737400	7111700	8216600	10292000	5963700	0.495223	0.252919	2006-09-01	sp|Q9R1T4|SEPT6_MOUSE Septin-6 OS=Mus musculus OX=10090 GN=Septin6 PE=1 SV=4
143510000	151550000	143280000	130380000	138960000	121120000	104980000	1.26398	0.238377	2007-09-01	sp|O55131|SEPT7_MOUSE Septin-7 OS=Mus musculus OX=10090 GN=Septin7 PE=1 SV=1
52962000	59840000	58342000	49946000	35499000	47834000	48586000	1.35468	0.32738	2008-09-01	sp|Q8CHH9|SEPT8_MOUSE Septin-8 OS=Mus musculus OX=10090 GN=Septin8 PE=1 SV=4
75793000	90633000	83186000	74543000	70280000	79819000	73695000	1.00004	0.157782	2009-09-01	sp|Q80UG5|SEPT9_MOUSE Septin-9 OS=Mus musculus OX=10090 GN=Septin9 PE=1 SV=1
17826000	15311000	15036000	14644000	20536000	14755000	20749000	0.310541	-0.138121	2010-09-01	sp|Q8C650|SEP10_MOUSE Septin-10 OS=Mus musculus OX=10090 GN=Septin10 PE=1 SV=1
174660	174660	174660	174660	4083200	174660	7852600	0.617979	-4.13622	2011-03-01	sp|Q8CBH7|MARHB_MOUSE E3 ubiquitin-protein ligase MARCHF11 OS=Mus musculus OX=10090 GN=Marchf11 PE=2 SV=2
136400000	141860000	131310000	109380000	86141000	86355000	77563000	2.5708	0.603401	2011-09-01	sp|Q8C1B7|SEP11_MOUSE Septin-11 OS=Mus musculus OX=10090 GN=Septin11 PE=1 SV=4
54081000	69511000	58486000	54742000	57118000	79862000	83246000	0.356138	-0.17967	2014-09-01	sp|Q9DA97|SEP14_MOUSE Septin-14 OS=Mus musculus OX=10090 GN=Sept14 PE=1 SV=3
50285000	85007000	75591000	71355000	48438000	62586000	40972000	0.556794	0.332168	2015-09-01	sp|Q9ERR7|SEP15_MOUSE Selenoprotein F OS=Mus musculus OX=10090 GN=Selenof PE=1 SV=3
10389000	6521500	6052700	28612000	18686000	12484000	13020000	1.15886	-1.24962	1700010I14Rik	tr|Q7TPG0|Q7TPG0_MOUSE GI:13385330 OS=Mus musculus OX=10090 GN=1700010I14Rik PE=4 SV=1
6888200	174660	174660	10559000	8599800	5328300	6328000	1.14047	-1.67503	1700011I03Rik	tr|E9PYL8|E9PYL8_MOUSE Coiled-coil domain-containing 192 OS=Mus musculus OX=10090 GN=Ccdc192 PE=4 SV=1
37363000	60699000	81387000	57416000	38532000	67200000	106050000	0.14121	-0.170056	1700011M02Rik	tr|B1AX35|B1AX35_MOUSE RIKEN cDNA 1700011M02 gene OS=Mus musculus OX=10090 GN=1700011M02Rik PE=4 SV=1
174660	174660	174660	4085100	5213000	6835300	8250600	2.55884	-5.12524	1700012B09Rik	sp|Q9DAE7|CK097_MOUSE Uncharacterized protein C11orf97 homolog OS=Mus musculus OX=10090 PE=1 SV=1
48219000	58765000	47480000	42223000	45440000	52071000	33355000	0.705764	0.250794	1700013H16Rik	tr|Q9DAC5|Q9DAC5_MOUSE RIKEN cDNA 1700013H16 gene OS=Mus musculus OX=10090 GN=1700013H16Rik PE=1 SV=1
174660	174660	174660	174660	7988200	3365200	8644500	1.02149	-4.8517	1700019A02Rik	tr|A0A087WPV9|A0A087WPV9_MOUSE RIKEN cDNA 1700019A02 gene OS=Mus musculus OX=10090 GN=1700019A02Rik PE=4 SV=1
5083000	174660	5161600	4930700	8283900	4509700	9116300	0.801827	-0.950127	1700020D05Rik	tr|Q99PB1|Q99PB1_MOUSE Mage-g2 OS=Mus musculus OX=10090 GN=Nscme3l PE=1 SV=1
25065000	9231500	20008000	23663000	37209000	36851000	30276000	1.29196	-0.821951	1700020N01Rik	tr|Q8CF20|Q8CF20_MOUSE RIKEN cDNA 1700020N01 gene OS=Mus musculus OX=10090 GN=1700020N01Rik PE=1 SV=1
3170000	174660	174660	4337200	8524600	174660	174660	0.362055	-1.49335	1700029P11Rik	tr|Q9CQ68|Q9CQ68_MOUSE Complex I-ESSS OS=Mus musculus OX=10090 GN=Ndufb11b PE=1 SV=1
5718200	174660	3174500	10893000	25165000	18395000	50132000	1.14353	-3.11281	1700123L14Rik	tr|Q3V2K7|Q3V2K7_MOUSE RIKEN cDNA 1700123L14 gene OS=Mus musculus OX=10090 GN=1700123L14Rik PE=1 SV=1
21753000	26114000	23571000	19382000	24037000	24122000	27458000	0.00939989	0.00381686	2210016F16Rik	tr|G3X8U3|G3X8U3_MOUSE Queuosine salvage protein OS=Mus musculus OX=10090 GN=2210016F16Rik PE=1 SV=1
4196700	174660	174660	4981900	3724400	174660	3491800	0.416001	-1.02945	2310061I04Rik	tr|B8JJ69|B8JJ69_MOUSE RIKEN cDNA 2310061I04 gene OS=Mus musculus OX=10090 GN=2310061I04Rik PE=1 SV=1
7400200	12989000	10005000	4040600	8379700	10830000	174660	0.645407	0.790787	2410002F23Rik	tr|Q3TE80|Q3TE80_MOUSE RIKEN cDNA 2410002F23 gene OS=Mus musculus OX=10090 GN=2410002F23Rik PE=1 SV=1
16828000	20916000	28642000	18209000	22685000	20227000	20225000	0.230953	0.121845	2610020H08Rik	tr|D3YW29|D3YW29_MOUSE RNA exonuclease 5 OS=Mus musculus OX=10090 GN=Rexo5 PE=1 SV=1
174660	174660	174660	174660	174660	3148200	3959800	0.680769	-3.41604	4930430A15Rik	tr|Q05AC5|Q05AC5_MOUSE ANKRD26-like family C, member 3 OS=Mus musculus OX=10090 GN=A26c3 PE=2 SV=1
5813400	7850700	7058700	6286700	6485600	5511600	6782000	0.484791	0.14053	4930502E18Rik	tr|Q14BQ3|Q14BQ3_MOUSE Cancer/testis antigen 55 OS=Mus musculus OX=10090 GN=Ct55 PE=1 SV=1
174660	174660	2059000	174660	2679600	10103000	26471000	0.594826	-3.61809	4930504O13Rik	tr|Q8C5Z9|Q8C5Z9_MOUSE LY6/PLAUR domain-containing 9 OS=Mus musculus OX=10090 GN=Lypd9 PE=2 SV=1
18269000	4572600	11502000	25018000	11735000	48444000	73970000	0.832452	-1.79739	4930544G11Rik	tr|Q9CR99|Q9CR99_MOUSE RIKEN cDNA 4930544G11 gene OS=Mus musculus OX=10090 GN=4930544G11Rik PE=1 SV=1
228810000	212350000	285720000	236990000	190070000	160620000	144700000	0.964072	0.404162	4930550L24Rik	tr|Q99PA7|Q99PA7_MOUSE MAGE family member A13 OS=Mus musculus OX=10090 GN=Magea13 PE=1 SV=1
35824000	36553000	26013000	21292000	18980000	30601000	40616000	0.316517	0.23472	4931406P16Rik	tr|Q8C5X1|Q8C5X1_MOUSE Granule-associated Rac and RHOG effector 1 OS=Mus musculus OX=10090 GN=Garre1 PE=1 SV=1
174660	174660	174660	2209100	174660	3174200	5010800	1.03087	-3.91911	4933409G03Rik	tr|Q8C5U0|Q8C5U0_MOUSE RIKEN cDNA 4933409G03 gene OS=Mus musculus OX=10090 GN=4933409G03Rik PE=1 SV=1
47220000	35891000	45219000	63827000	68402000	64146000	67253000	3.09277	-0.623608	4933416C03Rik	tr|Q3V063|Q3V063_MOUSE Taf7l2 OS=Mus musculus OX=10090 GN=Taf7l2 PE=1 SV=1
40229000	45119000	41334000	34118000	30778000	31013000	37934000	1.87743	0.335707	8030474K03Rik	tr|E9Q4Y8|E9Q4Y8_MOUSE RIKEN cDNA 8030474K03 gene OS=Mus musculus OX=10090 GN=8030474K03Rik PE=1 SV=2
20163000	8688000	12683000	17959000	24375000	31150000	62817000	0.808041	-1.29939	9230110C19Rik	sp|Q8CC70|CF300_MOUSE Cilia- and flagella-associated protein 300 OS=Mus musculus OX=10090 GN=Cfap300 PE=2 SV=1
174660	174660	174660	174660	6283600	9772500	12484000	1.11697	-5.3611	A0A668KM50	tr|A0A668KM50|A0A668KM50_MOUSE Uncharacterized protein OS=Mus musculus OX=10090 GN=A930007A09Rik PE=4 SV=1A0A668KM50
70831000	81498000	69226000	71239000	81076000	63136000	65051000	0.26244	0.0746913	A2m	sp|Q61838|PZP_MOUSE Pregnancy zone protein OS=Mus musculus OX=10090 GN=Pzp PE=1 SV=3
11615000	8176600	12183000	9565300	7910500	6557600	12193000	0.388659	0.234922	Aaas	sp|P58742|AAAS_MOUSE Aladin OS=Mus musculus OX=10090 GN=Aaas PE=1 SV=1
12969000	12491000	8946400	10647000	9426100	10444000	15002000	0.0165417	0.0112424	Aacs	sp|Q9D2R0|AACS_MOUSE Acetoacetyl-CoA synthetase OS=Mus musculus OX=10090 GN=Aacs PE=1 SV=1
14156000	10567000	6631600	13737000	23280000	22864000	3857600	0.417695	-0.608453	Aagab	sp|Q8R2R3|AAGAB_MOUSE Alpha- and gamma-adaptin-binding protein p34 OS=Mus musculus OX=10090 GN=Aagab PE=1 SV=2
17942000	19364000	23092000	19205000	17419000	16348000	12785000	0.879799	0.292394	Aak1	sp|Q3UHJ0|AAK1_MOUSE AP2-associated protein kinase 1 OS=Mus musculus OX=10090 GN=Aak1 PE=1 SV=2
21030000	16700000	21091000	25508000	29019000	28154000	37881000	1.56875	-0.620335	Aamdc	sp|Q8R0P4|AAMDC_MOUSE Mth938 domain-containing protein OS=Mus musculus OX=10090 GN=Aamdc PE=1 SV=1
50294000	46422000	52779000	53885000	45021000	51524000	52953000	0.133935	-0.0290644	Aamp	tr|J3QN89|J3QN89_MOUSE Angio-associated migratory protein OS=Mus musculus OX=10090 GN=Aamp PE=1 SV=1
11615000	14931000	19986000	7886500	11500000	15306000	10791000	0.723978	0.447917	Aar2	sp|Q9D2V5|AAR2_MOUSE Protein AAR2 homolog OS=Mus musculus OX=10090 GN=Aar2 PE=1 SV=3
20159000	14761000	19871000	11639000	15569000	17101000	18374000	0.516318	0.220902	Aard	sp|Q811W1|AARD_MOUSE Alanine and arginine-rich domain-containing protein OS=Mus musculus OX=10090 GN=Aard PE=2 SV=1
79393000	69981000	72237000	85019000	90715000	83940000	99964000	1.64096	-0.283478	Aars	sp|Q8BGQ7|SYAC_MOUSE Alanine--tRNA ligase, cytoplasmic OS=Mus musculus OX=10090 GN=Aars1 PE=1 SV=1
9516700	8568900	13109000	8374100	11154000	12921000	13304000	0.23602	-0.137536	Aars2	sp|Q14CH7|SYAM_MOUSE Alanine--tRNA ligase, mitochondrial OS=Mus musculus OX=10090 GN=Aars2 PE=1 SV=1
33311000	29324000	30863000	33029000	34040000	39092000	37461000	1.23022	-0.204232	Aarsd1	sp|Q3THG9|AASD1_MOUSE Alanyl-tRNA editing protein Aarsd1 OS=Mus musculus OX=10090 GN=Aarsd1 PE=1 SV=2
21805000	15873000	14736000	19448000	17491000	26937000	24824000	0.695093	-0.343944	Aasdhppt	sp|Q9CQF6|ADPPT_MOUSE L-aminoadipate-semialdehyde dehydrogenase-phosphopantetheinyl transferase OS=Mus musculus OX=10090 GN=Aasdhppt PE=1 SV=1
14311000	12508000	16515000	9821800	10202000	11442000	10128000	1.91004	0.474168	Aass	sp|Q99K67|AASS_MOUSE Alpha-aminoadipic semialdehyde synthase, mitochondrial OS=Mus musculus OX=10090 GN=Aass PE=1 SV=1
22047000	28973000	24414000	19014000	28843000	16593000	10517000	0.617138	0.423997	Aatf	sp|Q9JKX4|AATF_MOUSE Protein AATF OS=Mus musculus OX=10090 GN=Aatf PE=1 SV=1
150310000	170130000	130360000	137090000	123970000	155730000	97755000	0.573427	0.224228	Abat	sp|P61922|GABT_MOUSE 4-aminobutyrate aminotransferase, mitochondrial OS=Mus musculus OX=10090 GN=Abat PE=1 SV=1
10889000	13306000	13582000	16324000	17265000	8605600	14463000	0.265598	-0.169724	Abca1	sp|P41233|ABCA1_MOUSE Phospholipid-transporting ATPase ABCA1 OS=Mus musculus OX=10090 GN=Abca1 PE=1 SV=4
37579000	20064000	34643000	61640000	54364000	58083000	59419000	2.62166	-0.924238	Abca5	sp|Q8K448|ABCA5_MOUSE Cholesterol transporter ABCA5 OS=Mus musculus OX=10090 GN=Abca5 PE=1 SV=2
13171000	5578400	14807000	9586900	10041000	12672000	14325000	0.0607245	-0.0594752	Abcb10	sp|Q9JI39|ABCBA_MOUSE ATP-binding cassette sub-family B member 10, mitochondrial OS=Mus musculus OX=10090 GN=Abcb10 PE=1 SV=1
2485500	3300500	2374400	174660	174660	1875000	174660	1.89519	2.18126	Abcb1a	sp|P21447|MDR1A_MOUSE ATP-dependent translocase ABCB1 OS=Mus musculus OX=10090 GN=Abcb1a PE=1 SV=3
122510000	147100000	103700000	128470000	119320000	67247000	57702000	0.612349	0.417246	Abcb6	sp|Q9DC29|ABCB6_MOUSE ATP-binding cassette sub-family B member 6, mitochondrial OS=Mus musculus OX=10090 GN=Abcb6 PE=1 SV=1
11050000	11773000	13889000	8584700	11540000	8986000	4308400	1.00883	0.550616	Abcb7	sp|Q61102|ABCB7_MOUSE ATP-binding cassette sub-family B member 7, mitochondrial OS=Mus musculus OX=10090 GN=Abcb7 PE=1 SV=3
14901000	9989300	16881000	13726000	14878000	17130000	22287000	0.488104	-0.288431	Abcb8	sp|Q9CXJ4|MITOS_MOUSE Mitochondrial potassium channel ATP-binding subunit OS=Mus musculus OX=10090 GN=Abcb8 PE=1 SV=1
174660	174660	174660	174660	174660	174660	174660	#DIV/0!	0	Abcc12	sp|Q80WJ6|MRP9_MOUSE ATP-binding cassette sub-family C member 12 OS=Mus musculus OX=10090 GN=Abcc12 PE=1 SV=1
7097400	3741200	3866000	174660	174660	3141400	3604000	1.0933	1.46649	Abcd2	sp|Q61285|ABCD2_MOUSE ATP-binding cassette sub-family D member 2 OS=Mus musculus OX=10090 GN=Abcd2 PE=1 SV=1
186150000	219210000	162310000	184290000	211420000	170680000	160490000	0.149237	0.0583728	Abcd3	sp|P55096|ABCD3_MOUSE ATP-binding cassette sub-family D member 3 OS=Mus musculus OX=10090 GN=Abcd3 PE=1 SV=2
107380000	75909000	85910000	78674000	103140000	91488000	90390000	0.0420402	-0.0190066	Abce1	sp|P61222|ABCE1_MOUSE ATP-binding cassette sub-family E member 1 OS=Mus musculus OX=10090 GN=Abce1 PE=1 SV=1
58586000	74129000	65456000	66835000	72418000	60055000	68750000	0.0698598	-0.0207618	Abcf1	sp|Q6P542|ABCF1_MOUSE ATP-binding cassette sub-family F member 1 OS=Mus musculus OX=10090 GN=Abcf1 PE=1 SV=1
49927000	42110000	43729000	46373000	45470000	39624000	45239000	0.15133	0.0348087	Abcf2	sp|Q99LE6|ABCF2_MOUSE ATP-binding cassette sub-family F member 2 OS=Mus musculus OX=10090 GN=Abcf2 PE=1 SV=1
31690000	22156000	31783000	32018000	34062000	34234000	35945000	0.962162	-0.255143	Abcf3	sp|Q8K268|ABCF3_MOUSE ATP-binding cassette sub-family F member 3 OS=Mus musculus OX=10090 GN=Abcf3 PE=1 SV=1
10972000	4789600	2683300	10087000	5470300	1692100	6347500	0.0291036	0.0596621	Abcg2	sp|Q7TMS5|ABCG2_MOUSE Broad substrate specificity ATP-binding cassette transporter ABCG2 OS=Mus musculus OX=10090 GN=Abcg2 PE=1 SV=1
20965000	20593000	17989000	17986000	25574000	25243000	35236000	0.682463	-0.389986	Abhd10	sp|Q6PE15|ABHDA_MOUSE Palmitoyl-protein thioesterase ABHD10, mitochondrial OS=Mus musculus OX=10090 GN=Abhd10 PE=1 SV=1
153450000	139830000	251230000	163580000	123210000	173010000	117750000	0.493716	0.33005	Abhd11	sp|Q8K4F5|ABHDB_MOUSE Protein ABHD11 OS=Mus musculus OX=10090 GN=Abhd11 PE=1 SV=1
31359000	46078000	27253000	38699000	37600000	34746000	38579000	0.200213	-0.10018	Abhd12	sp|Q99LR1|ABD12_MOUSE Lysophosphatidylserine lipase ABHD12 OS=Mus musculus OX=10090 GN=Abhd12 PE=1 SV=2
32195000	31774000	25945000	27962000	13937000	16413000	21589000	1.24977	0.58537	Abhd14b	sp|Q8VCR7|ABHEB_MOUSE Protein ABHD14B OS=Mus musculus OX=10090 GN=Abhd14b PE=1 SV=1
13471000	15034000	13504000	14093000	11902000	16164000	19336000	0.29474	-0.134733	Abhd16a	sp|Q9Z1Q2|ABHGA_MOUSE Phosphatidylserine lipase ABHD16A OS=Mus musculus OX=10090 GN=Abhd16a PE=1 SV=3
37174000	51624000	60387000	27073000	38219000	52374000	45803000	0.458023	0.283123	Abhd4	sp|Q8VD66|ABHD4_MOUSE (Lyso)-N-acylphosphatidylethanolamine lipase OS=Mus musculus OX=10090 GN=Abhd4 PE=1 SV=1
10351000	7058000	3381900	7594300	6735800	5544400	6948500	0.0441344	0.0475191	Abhd5	sp|Q9DBL9|ABHD5_MOUSE 1-acylglycerol-3-phosphate O-acyltransferase ABHD5 OS=Mus musculus OX=10090 GN=Abhd5 PE=1 SV=1
46272000	50631000	65834000	51042000	55184000	49950000	39209000	0.359822	0.15126	Abhd6	sp|Q8R2Y0|ABHD6_MOUSE Monoacylglycerol lipase ABHD6 OS=Mus musculus OX=10090 GN=Abhd6 PE=1 SV=1
19914000	18327000	20593000	19083000	16530000	16360000	21150000	0.392896	0.101362	Abi1	sp|Q8CBW3|ABI1_MOUSE Abl interactor 1 OS=Mus musculus OX=10090 GN=Abi1 PE=1 SV=3
174660	13019000	11329000	9621400	9951900	10250000	9448800	0.189036	-0.264352	Abi2	sp|P62484|ABI2_MOUSE Abl interactor 2 OS=Mus musculus OX=10090 GN=Abi2 PE=1 SV=1
6679900	819690	9339900	5144300	5756700	7549800	6756000	0.115365	-0.166927	Abl2	sp|Q4JIM5|ABL2_MOUSE Tyrosine-protein kinase ABL2 OS=Mus musculus OX=10090 GN=Abl2 PE=1 SV=1
174660	4502000	2701400	3960600	174660	2361600	7222600	0.183672	-0.479873	Ablim1	sp|Q8K4G5|ABLM1_MOUSE Actin-binding LIM protein 1 OS=Mus musculus OX=10090 GN=Ablim1 PE=1 SV=1
108730000	133090000	125720000	92799000	97098000	126820000	63161000	0.804292	0.367403	Abracl	sp|Q4KML4|ABRAL_MOUSE Costars family protein ABRACL OS=Mus musculus OX=10090 GN=Abracl PE=1 SV=1
104480000	94880000	158610000	82226000	90578000	145830000	156900000	0.00522688	0.00532769	Acaa1a;Acaa1b	sp|Q921H8|THIKA_MOUSE 3-ketoacyl-CoA thiolase A, peroxisomal OS=Mus musculus OX=10090 GN=Acaa1a PE=1 SV=1;sp|Q8VCH0|THIKB_MOUSE 3-ketoacyl-CoA thiolase B, peroxisomal OS=Mus musculus OX=10090 GN=Acaa1b PE=1 SV=1
610100000	655700000	608100000	537300000	630670000	597610000	542550000	0.772368	0.114357	Acaa2	sp|Q8BWT1|THIM_MOUSE 3-ketoacyl-CoA thiolase, mitochondrial OS=Mus musculus OX=10090 GN=Acaa2 PE=1 SV=3
86873000	155580000	90648000	140510000	86799000	100150000	123900000	0.026143	-0.0232782	Acaca	sp|Q5SWU9|ACACA_MOUSE Acetyl-CoA carboxylase 1 OS=Mus musculus OX=10090 GN=Acaca PE=1 SV=1
61324000	174660	174660	174660	42746000	174660	174660	0.177056	0.926318	Acacb	sp|E9Q4Z2|ACACB_MOUSE Acetyl-CoA carboxylase 2 OS=Mus musculus OX=10090 GN=Acacb PE=1 SV=1
10382000	5884100	10313000	6376100	7889500	8280400	8684900	0.318402	0.182356	Acad10	sp|Q8K370|ACD10_MOUSE Acyl-CoA dehydrogenase family member 10 OS=Mus musculus OX=10090 GN=Acad10 PE=1 SV=1
23485000	17933000	22496000	22938000	18347000	21128000	20621000	0.110313	0.0374673	Acad11	sp|Q80XL6|ACD11_MOUSE Acyl-CoA dehydrogenase family member 11 OS=Mus musculus OX=10090 GN=Acad11 PE=1 SV=2
13437000	21978000	21110000	18549000	14488000	18061000	15884000	0.350968	0.170153	Acad12	tr|D3Z7X0|D3Z7X0_MOUSE Acyl-Coenzyme A dehydrogenase family, member 12 OS=Mus musculus OX=10090 GN=Acad12 PE=1 SV=1
27291000	29617000	25848000	29212000	30844000	26656000	23724000	0.0038101	-0.00123722	Acad8	sp|Q9D7B6|ACAD8_MOUSE Isobutyryl-CoA dehydrogenase, mitochondrial OS=Mus musculus OX=10090 GN=Acad8 PE=1 SV=2
71011000	50545000	47794000	68143000	50094000	58679000	51400000	0.0272311	-0.0159865	Acad9	sp|Q8JZN5|ACAD9_MOUSE Complex I assembly factor ACAD9, mitochondrial OS=Mus musculus OX=10090 GN=Acad9 PE=1 SV=2
236690000	236600000	153380000	212580000	252250000	195730000	156560000	0.0484694	0.0321955	Acadl	sp|P51174|ACADL_MOUSE Long-chain specific acyl-CoA dehydrogenase, mitochondrial OS=Mus musculus OX=10090 GN=Acadl PE=1 SV=2
85801000	112060000	108020000	94059000	111850000	82536000	82270000	0.371425	0.137698	Acadm	sp|P45952|ACADM_MOUSE Medium-chain specific acyl-CoA dehydrogenase, mitochondrial OS=Mus musculus OX=10090 GN=Acadm PE=1 SV=1
106350000	173850000	112800000	115810000	107960000	99041000	102410000	0.620431	0.301354	Acads	sp|Q07417|ACADS_MOUSE Short-chain specific acyl-CoA dehydrogenase, mitochondrial OS=Mus musculus OX=10090 GN=Acads PE=1 SV=2
48616000	47212000	48684000	44703000	46023000	51407000	49183000	0.0654716	0.0102693	Acadsb	sp|Q9DBL1|ACDSB_MOUSE Short/branched chain specific acyl-CoA dehydrogenase, mitochondrial OS=Mus musculus OX=10090 GN=Acadsb PE=1 SV=1
232020000	184200000	217480000	201360000	217850000	267490000	252340000	0.488229	-0.152349	Acadvl	sp|P50544|ACADV_MOUSE Very long-chain specific acyl-CoA dehydrogenase, mitochondrial OS=Mus musculus OX=10090 GN=Acadvl PE=1 SV=3
10755000	12660000	11259000	9355300	11984000	13550000	6055000	0.269518	0.175229	Acap2	sp|Q6ZQK5|ACAP2_MOUSE Arf-GAP with coiled-coil, ANK repeat and PH domain-containing protein 2 OS=Mus musculus OX=10090 GN=Acap2 PE=1 SV=2
296070000	262190000	239330000	274170000	292610000	268330000	302610000	0.499026	-0.0973888	Acat1	sp|Q8QZT1|THIL_MOUSE Acetyl-CoA acetyltransferase, mitochondrial OS=Mus musculus OX=10090 GN=Acat1 PE=1 SV=1
174660	34222000	57636000	14134000	68805000	50180000	57971000	0.369623	-0.638997	Acat2	sp|Q8CAY6|THIC_MOUSE Acetyl-CoA acetyltransferase, cytosolic OS=Mus musculus OX=10090 GN=Acat2 PE=1 SV=2
117050000	115800000	121860000	104900000	85714000	100940000	102550000	1.84024	0.263101	Acat3	tr|Q80X81|Q80X81_MOUSE Acetyl-Coenzyme A acetyltransferase 3 OS=Mus musculus OX=10090 GN=Acat3 PE=1 SV=1
55581000	61211000	61409000	52152000	57527000	66622000	71267000	0.179494	-0.0592819	Acbd3	sp|Q8BMP6|GCP60_MOUSE Golgi resident protein GCP60 OS=Mus musculus OX=10090 GN=Acbd3 PE=1 SV=3
72494000	102590000	79753000	91279000	74504000	57771000	59611000	0.539108	0.262969	Acbd5	sp|Q5XG73|ACBD5_MOUSE Acyl-CoA-binding domain-containing protein 5 OS=Mus musculus OX=10090 GN=Acbd5 PE=1 SV=1
13301000	8240900	9386000	10617000	20186000	11102000	22889000	0.713216	-0.651914	Acbd6	sp|Q9D061|ACBD6_MOUSE Acyl-CoA-binding domain-containing protein 6 OS=Mus musculus OX=10090 GN=Acbd6 PE=1 SV=2
1616600	50254000	174660	18986000	3545900	174660	16490000	0.198964	0.824077	Acbd7	sp|Q9D258|ACBD7_MOUSE Acyl-CoA-binding domain-containing protein 7 OS=Mus musculus OX=10090 GN=Acbd7 PE=3 SV=2
8969600	12045000	174660	7003900	16115000	1587200	174660	0.0566283	0.18334	Acd	sp|Q5EE38|ACD_MOUSE Adrenocortical dysplasia protein OS=Mus musculus OX=10090 GN=Acd PE=1 SV=1
25777000	24081000	18793000	28009000	21419000	25727000	20120000	0.123827	-0.0577795	Ace	sp|P09470|ACE_MOUSE Angiotensin-converting enzyme OS=Mus musculus OX=10090 GN=Ace PE=1 SV=3
168200000	161580000	164530000	169340000	161740000	134990000	135600000	0.630255	0.131481	Acin1	sp|Q9JIX8|ACINU_MOUSE Apoptotic chromatin condensation inducer in the nucleus OS=Mus musculus OX=10090 GN=Acin1 PE=1 SV=3
213710000	204270000	224660000	202880000	191800000	204830000	198410000	1.24003	0.102804	Acly	sp|Q91V92|ACLY_MOUSE ATP-citrate synthase OS=Mus musculus OX=10090 GN=Acly PE=1 SV=1
66121000	91128000	78475000	68487000	73165000	65732000	57652000	0.835186	0.245948	Aco1	sp|P28271|ACOC_MOUSE Cytoplasmic aconitate hydratase OS=Mus musculus OX=10090 GN=Aco1 PE=1 SV=3
332230000	312750000	339190000	340930000	349460000	362120000	358950000	1.44258	-0.105171	Aco2	sp|Q99KI0|ACON_MOUSE Aconitate hydratase, mitochondrial OS=Mus musculus OX=10090 GN=Aco2 PE=1 SV=1
76843000	72745000	96686000	68185000	73481000	50024000	58694000	1.12215	0.391159	Acot1	sp|O55137|ACOT1_MOUSE Acyl-coenzyme A thioesterase 1 OS=Mus musculus OX=10090 GN=Acot1 PE=1 SV=1
26569000	20737000	31455000	22762000	29141000	22707000	25231000	0.15592	0.0728865	Acot13	sp|Q9CQR4|ACO13_MOUSE Acyl-coenzyme A thioesterase 13 OS=Mus musculus OX=10090 GN=Acot13 PE=1 SV=1
11428000	8225400	10913000	2866800	8014100	9701200	12086000	0.348692	0.319102	Acot2	sp|Q9QYR9|ACOT2_MOUSE Acyl-coenzyme A thioesterase 2, mitochondrial OS=Mus musculus OX=10090 GN=Acot2 PE=1 SV=2
153330000	90646000	123010000	145910000	173000000	156350000	146540000	0.970149	-0.345688	Acot7	sp|Q91V12|BACH_MOUSE Cytosolic acyl coenzyme A thioester hydrolase OS=Mus musculus OX=10090 GN=Acot7 PE=1 SV=2
38383000	25465000	26426000	32402000	26052000	27775000	35464000	0.0261487	-0.0158262	Acot8	sp|P58137|ACOT8_MOUSE Acyl-coenzyme A thioesterase 8 OS=Mus musculus OX=10090 GN=Acot8 PE=1 SV=1
25022000	31734000	31806000	22526000	29620000	32513000	31313000	0.0568744	0.0260207	Acot9;Acot10	sp|Q9R0X4|ACOT9_MOUSE Acyl-coenzyme A thioesterase 9, mitochondrial OS=Mus musculus OX=10090 GN=Acot9 PE=1 SV=1;sp|Q32MW3|ACO10_MOUSE Acyl-coenzyme A thioesterase 10, mitochondrial OS=Mus musculus OX=10090 GN=Acot10 PE=2 SV=1
50851000	65317000	58930000	60587000	64349000	68443000	66963000	0.801077	-0.157208	Acox1	sp|Q9R0H0|ACOX1_MOUSE Peroxisomal acyl-coenzyme A oxidase 1 OS=Mus musculus OX=10090 GN=Acox1 PE=1 SV=5
9323800	12938000	4447200	6857100	9502900	9451600	10968000	0.0439854	-0.0465423	Acox3	sp|Q9EPL9|ACOX3_MOUSE Peroxisomal acyl-coenzyme A oxidase 3 OS=Mus musculus OX=10090 GN=Acox3 PE=1 SV=2
42540000	39801000	39643000	67206000	48487000	49870000	50939000	1.29727	-0.412651	Acp1	sp|Q9D358|PPAC_MOUSE Low molecular weight phosphotyrosine protein phosphatase OS=Mus musculus OX=10090 GN=Acp1 PE=1 SV=3
14430000	9095900	7619600	14424000	11457000	10793000	13492000	0.481552	-0.272649	Acp2	sp|P24638|PPAL_MOUSE Lysosomal acid phosphatase OS=Mus musculus OX=10090 GN=Acp2 PE=1 SV=2
33490000	38770000	41902000	28516000	29921000	30171000	34570000	1.43122	0.305375	Acp6	sp|Q8BP40|PPA6_MOUSE Lysophosphatidic acid phosphatase type 6 OS=Mus musculus OX=10090 GN=Acp6 PE=1 SV=1
5684600	4885200	7007300	9098400	21874000	18189000	29784000	1.37824	-1.75212	Acr	sp|P23578|ACRO_MOUSE Acrosin OS=Mus musculus OX=10090 GN=Acr PE=1 SV=1
15727000	7276800	25425000	47947000	49461000	41395000	58574000	2.55731	-1.61198	Acrbp	sp|Q3V140|ACRBP_MOUSE Acrosin-binding protein OS=Mus musculus OX=10090 GN=Acrbp PE=1 SV=1
498750000	641840000	533600000	495720000	613830000	690120000	724020000	0.46218	-0.177034	Acsbg1	sp|Q99PU5|ACBG1_MOUSE Long-chain-fatty-acid--CoA ligase ACSBG1 OS=Mus musculus OX=10090 GN=Acsbg1 PE=1 SV=1
72760000	72449000	52780000	86542000	70329000	53363000	49340000	0.0327443	0.0243119	Acsf2	sp|Q8VCW8|ACSF2_MOUSE Medium-chain acyl-CoA ligase ACSF2, mitochondrial OS=Mus musculus OX=10090 GN=Acsf2 PE=1 SV=1
3202300	4423800	3981100	4035400	4256300	4922200	4623300	0.74595	-0.204832	Acsf3	sp|Q3URE1|ACSF3_MOUSE Malonate--CoA ligase ACSF3, mitochondrial OS=Mus musculus OX=10090 GN=Acsf3 PE=1 SV=2
80540000	118590000	75278000	62287000	62039000	72427000	80399000	0.861284	0.400683	Acsl1	sp|P41216|ACSL1_MOUSE Long-chain-fatty-acid--CoA ligase 1 OS=Mus musculus OX=10090 GN=Acsl1 PE=1 SV=2
13723000	11519000	18299000	20149000	24600000	22209000	23736000	1.99391	-0.643595	Acsl3	sp|Q9CZW4|ACSL3_MOUSE Long-chain-fatty-acid--CoA ligase 3 OS=Mus musculus OX=10090 GN=Acsl3 PE=1 SV=2
20597000	14001000	5354000	15107000	34667000	21955000	25159000	0.879437	-0.863013	Acsl4	sp|Q9QUJ7|ACSL4_MOUSE Long-chain-fatty-acid--CoA ligase 4 OS=Mus musculus OX=10090 GN=Acsl4 PE=1 SV=2
174660	174660	174660	174660	174660	174660	174660	#DIV/0!	0	Acsl5	sp|Q8JZR0|ACSL5_MOUSE Long-chain-fatty-acid--CoA ligase 5 OS=Mus musculus OX=10090 GN=Acsl5 PE=1 SV=1
25698000	21989000	26632000	22937000	32453000	37156000	35239000	0.897885	-0.366878	Acsl6	sp|Q91WC3|ACSL6_MOUSE Long-chain-fatty-acid--CoA ligase 6 OS=Mus musculus OX=10090 GN=Acsl6 PE=1 SV=1
53780000	55681000	44970000	36228000	45826000	44286000	44233000	1.17965	0.271611	Acss1	sp|Q99NB1|ACS2L_MOUSE Acetyl-coenzyme A synthetase 2-like, mitochondrial OS=Mus musculus OX=10090 GN=Acss1 PE=1 SV=1
61403000	46166000	55537000	65067000	68014000	60785000	80902000	1.1363	-0.337367	Acss2	sp|Q9QXG4|ACSA_MOUSE Acetyl-coenzyme A synthetase, cytoplasmic OS=Mus musculus OX=10090 GN=Acss2 PE=1 SV=2
174660	174660	174660	174660	174660	174660	174660	#DIV/0!	0	Acta1	sp|P68134|ACTS_MOUSE Actin, alpha skeletal muscle OS=Mus musculus OX=10090 GN=Acta1 PE=1 SV=1
203680000	290620000	128930000	83325000	309460000	225880000	212200000	0.000131948	0.000188095	Acta2;Actg2	sp|P62737|ACTA_MOUSE Actin, aortic smooth muscle OS=Mus musculus OX=10090 GN=Acta2 PE=1 SV=1;sp|P63268|ACTH_MOUSE Actin, gamma-enteric smooth muscle OS=Mus musculus OX=10090 GN=Actg2 PE=1 SV=1
204390000	479180000	227940000	234880000	196920000	48547000	67129000	0.890474	1.1505	Actb	sp|P60710|ACTB_MOUSE Actin, cytoplasmic 1 OS=Mus musculus OX=10090 GN=Actb PE=1 SV=1
174660	3440300000	174660	174660	3484500000	174660	174660	0.0692968	0.39655	Actbl2	sp|Q8BFZ3|ACTBL_MOUSE Beta-actin-like protein 2 OS=Mus musculus OX=10090 GN=Actbl2 PE=1 SV=1
1214300000	2025100000	1433800000	1291900000	1602000000	1264200000	1652400000	0.171335	0.100786	Actc1	sp|P68033|ACTC_MOUSE Actin, alpha cardiac muscle 1 OS=Mus musculus OX=10090 GN=Actc1 PE=1 SV=1
5181600000	5772300000	5633100000	5101700000	5968100000	4825900000	5011300000	0.388761	0.0811044	Actg1	sp|P63260|ACTG_MOUSE Actin, cytoplasmic 2 OS=Mus musculus OX=10090 GN=Actg1 PE=1 SV=1
94242000	72913000	93422000	101930000	109480000	116600000	169490000	0.974126	-0.517949	Actl6a	sp|Q9Z2N8|ACL6A_MOUSE Actin-like protein 6A OS=Mus musculus OX=10090 GN=Actl6a PE=1 SV=2
174660	174660	174660	174660	174660	174660	3199900	0.359928	-2.41419	Actl7a	sp|Q9QY84|ACL7A_MOUSE Actin-like protein 7A OS=Mus musculus OX=10090 GN=Actl7a PE=1 SV=1
1474200	174660	2700700	2418700	9165900	31411000	106780000	0.585651	-4.69075	Actl7b	sp|Q9QY83|ACL7B_MOUSE Actin-like protein 7B OS=Mus musculus OX=10090 GN=Actl7b PE=1 SV=2
71688000	81920000	61014000	52790000	52263000	52232000	70386000	0.98875	0.329885	Actn1	sp|Q7TPR4|ACTN1_MOUSE Alpha-actinin-1 OS=Mus musculus OX=10090 GN=Actn1 PE=1 SV=1
7896300	6406800	889280	16759000	12151000	14305000	17634000	2.1514	-1.58685	Actn3	sp|O88990|ACTN3_MOUSE Alpha-actinin-3 OS=Mus musculus OX=10090 GN=Actn3 PE=2 SV=1
153320000	163510000	144430000	121650000	128070000	159900000	157210000	0.420334	0.117702	Actn4	sp|P57780|ACTN4_MOUSE Alpha-actinin-4 OS=Mus musculus OX=10090 GN=Actn4 PE=1 SV=1
19295000	21555000	31035000	36355000	34473000	38765000	20882000	0.735281	-0.444973	Actr10	sp|Q9QZB7|ARP10_MOUSE Actin-related protein 10 OS=Mus musculus OX=10090 GN=Actr10 PE=1 SV=2
261080000	206750000	215920000	259260000	255600000	308480000	252210000	0.960629	-0.238496	Actr1a	sp|P61164|ACTZ_MOUSE Alpha-centractin OS=Mus musculus OX=10090 GN=Actr1a PE=1 SV=1
28811000	27789000	29075000	39021000	36798000	39311000	47788000	2.08154	-0.512162	Actr1b	sp|Q8R5C5|ACTY_MOUSE Beta-centractin OS=Mus musculus OX=10090 GN=Actr1b PE=1 SV=1
62344000	82872000	59126000	77820000	57011000	51062000	51237000	0.391387	0.200345	Actr2	sp|P61161|ARP2_MOUSE Actin-related protein 2 OS=Mus musculus OX=10090 GN=Actr2 PE=1 SV=1
147360000	134700000	150100000	129020000	145710000	159530000	152700000	0.11352	-0.0266591	Actr3	sp|Q99JY9|ARP3_MOUSE Actin-related protein 3 OS=Mus musculus OX=10090 GN=Actr3 PE=1 SV=3
16719000	87277000	39998000	37150000	25956000	34984000	38891000	0.325839	0.48707	Actr5	sp|Q80US4|ARP5_MOUSE Actin-related protein 5 OS=Mus musculus OX=10090 GN=Actr5 PE=1 SV=3
4214200	174660	174660	174660	174660	4072000	174660	0.082732	0.404812	Actr6	sp|Q9D864|ARP6_MOUSE Actin-related protein 6 OS=Mus musculus OX=10090 GN=Actr6 PE=1 SV=2
174660	174660	174660	174660	174660	174660	174660	#DIV/0!	0	Actrt2	sp|Q9D9L5|ACTT2_MOUSE Actin-related protein T2 OS=Mus musculus OX=10090 GN=Actrt2 PE=2 SV=1
11992000	19502000	16803000	18812000	23049000	16721000	14165000	0.299659	-0.175917	Acy1	sp|Q99JW2|ACY1_MOUSE Aminoacylase-1 OS=Mus musculus OX=10090 GN=Acy1 PE=1 SV=1
8289200	9667800	14870000	6851700	174660	7593200	13612000	0.472408	0.632612	Acy3	sp|Q91XE4|ACY3_MOUSE N-acyl-aromatic-L-amino acid amidohydrolase (carboxylate-forming) OS=Mus musculus OX=10090 GN=Acy3 PE=1 SV=1
509180000	287440000	564390000	742700000	799310000	1010300000	955650000	2.03254	-0.950917	Acyp1	sp|P56376|ACYP1_MOUSE Acylphosphatase-1 OS=Mus musculus OX=10090 GN=Acyp1 PE=1 SV=2
15263000	10046000	16068000	15383000	16834000	18703000	17399000	0.908409	-0.30842	Acyp2	sp|P56375|ACYP2_MOUSE Acylphosphatase-2 OS=Mus musculus OX=10090 GN=Acyp2 PE=1 SV=2
11315000	10175000	9557000	8117700	8267700	8972600	8060600	1.98944	0.30884	Ada	sp|P03958|ADA_MOUSE Adenosine deaminase OS=Mus musculus OX=10090 GN=Ada PE=1 SV=3
29932000	19878000	28503000	42363000	52858000	54043000	65733000	2.167	-1.04196	Adad1	sp|Q5SUE7|ADAD1_MOUSE Adenosine deaminase domain-containing protein 1 OS=Mus musculus OX=10090 GN=Adad1 PE=1 SV=1
27230000	11159000	13266000	26760000	40185000	34778000	43510000	1.60001	-1.07635	Adad2	sp|Q9D5P4|ADAD2_MOUSE Adenosine deaminase domain-containing protein 2 OS=Mus musculus OX=10090 GN=Adad2 PE=2 SV=1
174660	174660	174660	6573400	3002400	174660	174660	0.59279	-3.82846	Adal	sp|Q80SY6|ADAL_MOUSE Adenosine deaminase-like protein OS=Mus musculus OX=10090 GN=Adal PE=2 SV=1
8387300	10098000	174660	6706100	6317900	174660	12809000	0.0239472	-0.0639532	Adam10	sp|O35598|ADA10_MOUSE Disintegrin and metalloproteinase domain-containing protein 10 OS=Mus musculus OX=10090 GN=Adam10 PE=1 SV=2
3931100	6295400	6879400	5230900	2934600	2275700	2500500	1.1228	0.817504	Adam17	sp|Q9Z0F8|ADA17_MOUSE Disintegrin and metalloproteinase domain-containing protein 17 OS=Mus musculus OX=10090 GN=Adam17 PE=1 SV=3
2995000	174660	174660	174660	6988600	4509500	9554900	0.815003	-2.25112	Adam18	sp|Q9R157|ADA18_MOUSE Disintegrin and metalloproteinase domain-containing protein 18 OS=Mus musculus OX=10090 GN=Adam18 PE=1 SV=2
174660	174660	2144200	174660	2304100	174660	8774700	0.34731	-1.78129	Adam1b	sp|Q8R534|ADM1B_MOUSE Disintegrin and metalloproteinase domain-containing protein 1b OS=Mus musculus OX=10090 GN=Adam1b PE=1 SV=2
28925000	9714500	22224000	39163000	53648000	70289000	103320000	1.38271	-1.71502	Adam2	sp|Q60718|ADAM2_MOUSE Disintegrin and metalloproteinase domain-containing protein 2 OS=Mus musculus OX=10090 GN=Adam2 PE=1 SV=2
9608300	5134200	174660	7545800	11332000	17306000	13383000	1.12214	-1.31736	Adam32	sp|Q8K410|ADA32_MOUSE Disintegrin and metalloproteinase domain-containing protein 32 OS=Mus musculus OX=10090 GN=Adam32 PE=1 SV=3
6867700	174660	4933600	8868500	7184900	7961500	8580800	1.21829	-1.0295	Adam5	sp|Q3TTE0|ADAM5_MOUSE Disintegrin and metalloproteinase domain-containing protein 5 OS=Mus musculus OX=10090 GN=Adam5 PE=1 SV=1
4371700	6840800	3328200	2073900	3564300	5087600	4443300	0.390963	0.353999	Adam9	sp|Q61072|ADAM9_MOUSE Disintegrin and metalloproteinase domain-containing protein 9 OS=Mus musculus OX=10090 GN=Adam9 PE=1 SV=2
8001300	7542200	7123600	4823200	5723200	5568600	7113600	1.46926	0.379735	Adck1	sp|Q9D0L4|ADCK1_MOUSE AarF domain-containing protein kinase 1 OS=Mus musculus OX=10090 GN=Adck1 PE=1 SV=1
18654000	15244000	2160800	9132100	12345000	12055000	7110100	0.158669	0.24241	Adck3	sp|Q60936|COQ8A_MOUSE Atypical kinase COQ8A, mitochondrial OS=Mus musculus OX=10090 GN=Coq8a PE=1 SV=2
5359400	174660	174660	6963400	174660	5066700	11584000	0.593627	-1.644	Adck4	sp|Q566J8|COQ8B_MOUSE Atypical kinase COQ8B, mitochondrial OS=Mus musculus OX=10090 GN=Coq8b PE=1 SV=1
4824800	5335200	4439500	3501700	4134100	6470500	12674000	0.305412	-0.460216	Adck5	sp|Q80V03|ADCK5_MOUSE Uncharacterized aarF domain-containing protein kinase 5 OS=Mus musculus OX=10090 GN=Adck5 PE=2 SV=2
7704000	10573000	13437000	12132000	35495000	17455000	41370000	0.939838	-1.33197	Adcy9	sp|P51830|ADCY9_MOUSE Adenylate cyclase type 9 OS=Mus musculus OX=10090 GN=Adcy9 PE=1 SV=1
69941000	95901000	94540000	69342000	67565000	72459000	59258000	1.27189	0.370079	Add1	sp|Q9QYC0|ADDA_MOUSE Alpha-adducin OS=Mus musculus OX=10090 GN=Add1 PE=1 SV=2
197130000	214420000	202940000	173370000	162520000	191410000	141750000	1.46602	0.292313	Add3	sp|Q9QYB5|ADDG_MOUSE Gamma-adducin OS=Mus musculus OX=10090 GN=Add3 PE=1 SV=2
2581800	174660	174660	174660	3854400	174660	174660	0.0313634	-0.163908	Adgb	sp|G3UZ78|ADGB_MOUSE Androglobin OS=Mus musculus OX=10090 GN=Adgb PE=1 SV=1
52390000	69831000	40882000	25309000	27110000	25346000	26228000	1.99438	1.06433	Adh1	sp|P00329|ADH1_MOUSE Alcohol dehydrogenase 1 OS=Mus musculus OX=10090 GN=Adh1 PE=1 SV=2
114410000	132780000	119120000	92991000	93127000	115760000	121740000	0.777909	0.205339	Adh5	sp|P28474|ADHX_MOUSE Alcohol dehydrogenase class-3 OS=Mus musculus OX=10090 GN=Adh5 PE=1 SV=3
6007700	9808300	7858700	174660	4850800	174660	5161200	1.42289	1.60718	Adhfe1	sp|Q8R0N6|HOT_MOUSE Hydroxyacid-oxoacid transhydrogenase, mitochondrial OS=Mus musculus OX=10090 GN=Adhfe1 PE=1 SV=2
37014000	42787000	29903000	25773000	25804000	33462000	31965000	0.91481	0.322096	Adi1	sp|Q99JT9|MTND_MOUSE 1,2-dihydroxy-3-keto-5-methylthiopentene dioxygenase OS=Mus musculus OX=10090 GN=Adi1 PE=1 SV=1
174660	2890900	2353200	174660	174660	2756000	2741100	0.113053	0.305447	Adipoq	sp|Q60994|ADIPO_MOUSE Adiponectin OS=Mus musculus OX=10090 GN=Adipoq PE=1 SV=2
128330000	119080000	97094000	111440000	88393000	100840000	67382000	0.810586	0.319637	Adk	sp|P55264|ADK_MOUSE Adenosine kinase OS=Mus musculus OX=10090 GN=Adk PE=1 SV=2
20746000	17457000	21398000	18795000	17847000	16810000	22171000	0.222841	0.071549	Adnp	sp|Q9Z103|ADNP_MOUSE Activity-dependent neuroprotector homeobox protein OS=Mus musculus OX=10090 GN=Adnp PE=1 SV=2
22135000	27050000	27367000	22872000	20688000	22068000	35726000	0.0137098	0.0101464	Ado	sp|Q6PDY2|AEDO_MOUSE 2-aminoethanethiol dioxygenase OS=Mus musculus OX=10090 GN=Ado PE=1 SV=2
48969000	33764000	31624000	54791000	47766000	59552000	59558000	1.5564	-0.539812	Adpgk	sp|Q8VDL4|ADPGK_MOUSE ADP-dependent glucokinase OS=Mus musculus OX=10090 GN=Adpgk PE=1 SV=2
161760000	97685000	119850000	162280000	187540000	157790000	192130000	1.30666	-0.468461	Adprh	sp|P54923|ADPRH_MOUSE [Protein ADP-ribosylarginine] hydrolase OS=Mus musculus OX=10090 GN=Adprh PE=1 SV=1
26130000	38690000	31351000	21298000	18567000	27469000	26832000	1.06924	0.445433	Adprhl2	sp|Q8CG72|ADPRS_MOUSE ADP-ribose glycohydrolase ARH3 OS=Mus musculus OX=10090 GN=Adprs PE=1 SV=1
6296900	5669500	3689500	3780200	7604100	7389200	3705900	0.101302	-0.10686	Adrbk1	sp|Q99MK8|ARBK1_MOUSE Beta-adrenergic receptor kinase 1 OS=Mus musculus OX=10090 GN=Grk2 PE=1 SV=2
55437000	69241000	77215000	58667000	86236000	84035000	84257000	0.529816	-0.218433	Adrm1;Gm9774	sp|Q9JKV1|ADRM1_MOUSE Proteasomal ubiquitin receptor ADRM1 OS=Mus musculus OX=10090 GN=Adrm1 PE=1 SV=2;tr|A0A0A6YVU8|A0A0A6YVU8_MOUSE Predicted pseudogene 9774 OS=Mus musculus OX=10090 GN=Gm9774 PE=3 SV=1
125280000	107800000	122950000	121480000	116060000	115440000	130880000	0.137468	-0.0275534	Adsl	sp|P54822|PUR8_MOUSE Adenylosuccinate lyase OS=Mus musculus OX=10090 GN=Adsl PE=1 SV=2
47893000	46212000	60869000	48915000	66024000	39453000	56382000	0.0465282	-0.0286332	Adss	sp|P46664|PURA2_MOUSE Adenylosuccinate synthetase isozyme 2 OS=Mus musculus OX=10090 GN=Adss2 PE=1 SV=2
8098800	10685000	6888500	4994100	4533200	4721400	9546500	0.729663	0.524579	Aebp1	sp|Q640N1|AEBP1_MOUSE Adipocyte enhancer-binding protein 1 OS=Mus musculus OX=10090 GN=Aebp1 PE=1 SV=1
174660	174660	6042600	18339000	19550000	5313800	174660	0.698202	-2.34759	Aes	sp|P63002|TLE5_MOUSE TLE family member 5 OS=Mus musculus OX=10090 GN=Tle5 PE=1 SV=1
7364200	7035700	9728400	8260200	6664500	6210200	7669700	0.406546	0.159465	Aff4	sp|Q9ESC8|AFF4_MOUSE AF4/FMR2 family member 4 OS=Mus musculus OX=10090 GN=Aff4 PE=1 SV=1
12476000	11468000	19342000	11614000	10370000	13400000	9980800	0.637617	0.347365	Afg3l1	sp|Q920A7|AFG31_MOUSE AFG3-like protein 1 OS=Mus musculus OX=10090 GN=Afg3l1 PE=1 SV=2
59681000	57257000	61825000	54404000	54310000	50965000	56063000	1.69989	0.143779	Afg3l2	sp|Q8JZQ2|AFG32_MOUSE AFG3-like protein 2 OS=Mus musculus OX=10090 GN=Afg3l2 PE=1 SV=1
28903000	31265000	33934000	46819000	23747000	20653000	108870000	0.322017	-0.673307	Afm	sp|O89020|AFAM_MOUSE Afamin OS=Mus musculus OX=10090 GN=Afm PE=1 SV=2
22872000	29406000	21563000	33553000	17669000	21530000	19144000	0.128901	0.0994575	Aftph	sp|Q80WT5|AFTIN_MOUSE Aftiphilin OS=Mus musculus OX=10090 GN=Aftph PE=1 SV=2
22643000	32453000	25365000	23931000	28866000	21519000	27406000	0.169669	0.0767673	Aga	sp|Q64191|ASPG_MOUSE N(4)-(beta-N-acetylglucosaminyl)-L-asparaginase OS=Mus musculus OX=10090 GN=Aga PE=1 SV=1
7881500	62952000	8398500	20086000	7773100	8499800	5842300	0.443293	1.32384	Agap3	sp|Q8VHH5|AGAP3_MOUSE Arf-GAP with GTPase, ANK repeat and PH domain-containing protein 3 OS=Mus musculus OX=10090 GN=Agap3 PE=1 SV=1
1866400	174660	174660	987110	174660	1419000	3022800	0.326223	-0.923533	Agbl2	sp|Q8CDK2|CBPC2_MOUSE Cytosolic carboxypeptidase 2 OS=Mus musculus OX=10090 GN=Agbl2 PE=1 SV=1
174660	174660	174660	3653600	2526400	4108400	4890600	2.79577	-4.44138	Agbl5	sp|Q09M02|CBPC5_MOUSE Cytosolic carboxypeptidase-like protein 5 OS=Mus musculus OX=10090 GN=Agbl5 PE=1 SV=2
100760000	89530000	90129000	145460000	90949000	94427000	82387000	0.227983	-0.144299	Agfg1	sp|Q8K2K6|AGFG1_MOUSE Arf-GAP domain and FG repeat-containing protein 1 OS=Mus musculus OX=10090 GN=Agfg1 PE=1 SV=2
42187000	55555000	63527000	37644000	37223000	22749000	32527000	1.62099	0.724409	Agfg2	sp|Q80WC7|AGFG2_MOUSE Arf-GAP domain and FG repeat-containing protein 2 OS=Mus musculus OX=10090 GN=Agfg2 PE=1 SV=1
58936000	45174000	43216000	51010000	65723000	64773000	82796000	0.958716	-0.428138	Agk	sp|Q9ESW4|AGK_MOUSE Acylglycerol kinase, mitochondrial OS=Mus musculus OX=10090 GN=Agk PE=1 SV=1
8061400	10700000	16997000	11428000	25170000	10013000	16317000	0.350042	-0.400382	Agl	tr|F8VPN4|F8VPN4_MOUSE 4-alpha-glucanotransferase OS=Mus musculus OX=10090 GN=Agl PE=1 SV=1
9096700	10509000	10410000	8207500	9576200	8535200	8663900	1.23472	0.194109	Ago2	sp|Q8CJG0|AGO2_MOUSE Protein argonaute-2 OS=Mus musculus OX=10090 GN=Ago2 PE=1 SV=3
22095000	10017000	15321000	18683000	24229000	22458000	32016000	0.952351	-0.622786	Agpat1	sp|O35083|PLCA_MOUSE 1-acyl-sn-glycerol-3-phosphate acyltransferase alpha OS=Mus musculus OX=10090 GN=Agpat1 PE=1 SV=1
19852000	30288000	17987000	29022000	28143000	32486000	23069000	0.649825	-0.311407	Agpat3	sp|Q9D517|PLCC_MOUSE 1-acyl-sn-glycerol-3-phosphate acyltransferase gamma OS=Mus musculus OX=10090 GN=Agpat3 PE=1 SV=2
70079000	68072000	73328000	57195000	55487000	86799000	59926000	0.259279	0.120334	Agpat4	sp|Q8K4X7|PLCD_MOUSE 1-acyl-sn-glycerol-3-phosphate acyltransferase delta OS=Mus musculus OX=10090 GN=Agpat4 PE=1 SV=1
7341700	4979500	6805100	5367700	8122900	7469700	7155500	0.293582	-0.140786	Agpat5	sp|Q9D1E8|PLCE_MOUSE 1-acyl-sn-glycerol-3-phosphate acyltransferase epsilon OS=Mus musculus OX=10090 GN=Agpat5 PE=1 SV=2
42321000	46796000	50938000	40108000	44504000	36678000	42387000	0.995106	0.190179	Agps	sp|Q8C0I1|ADAS_MOUSE Alkyldihydroxyacetonephosphate synthase, peroxisomal OS=Mus musculus OX=10090 GN=Agps PE=1 SV=1
15160000	12527000	19179000	17833000	9771500	12019000	18733000	0.12554	0.0986858	Agt	sp|P11859|ANGT_MOUSE Angiotensinogen OS=Mus musculus OX=10090 GN=Agt PE=1 SV=1
101840000	62301000	57373000	69412000	70611000	105200000	141220000	0.427181	-0.38782	Agtrap	sp|Q9WVK0|ATRAP_MOUSE Type-1 angiotensin II receptor-associated protein OS=Mus musculus OX=10090 GN=Agtrap PE=1 SV=2
31810000	39360000	39464000	36448000	28630000	21992000	29181000	0.942501	0.343589	Ahctf1	sp|Q8CJF7|ELYS_MOUSE Protein ELYS OS=Mus musculus OX=10090 GN=Ahctf1 PE=1 SV=1
442820000	486830000	541430000	371550000	406580000	349430000	390280000	1.97206	0.369893	Ahcy	sp|P50247|SAHH_MOUSE Adenosylhomocysteinase OS=Mus musculus OX=10090 GN=Ahcy PE=1 SV=3
28288000	21999000	14710000	22536000	16575000	17144000	22956000	0.187639	0.12971	Ahcyl1	sp|Q80SW1|SAHH2_MOUSE S-adenosylhomocysteine hydrolase-like protein 1 OS=Mus musculus OX=10090 GN=Ahcyl1 PE=1 SV=1
73703000	65676000	59226000	59197000	70263000	68777000	63341000	0.0613957	0.0176982	Ahcyl2	sp|Q68FL4|SAHH3_MOUSE Putative adenosylhomocysteinase 3 OS=Mus musculus OX=10090 GN=Ahcyl2 PE=1 SV=1
21333000	19421000	23174000	13641000	12881000	16452000	22389000	0.899344	0.383011	Ahdc1	sp|Q6PAL7|AHDC1_MOUSE AT-hook DNA-binding motif-containing protein 1 OS=Mus musculus OX=10090 GN=Ahdc1 PE=1 SV=1
174660	174660	174660	174660	4705500	174660	174660	0.359928	-2.90405	Ahi1	sp|Q8K3E5|AHI1_MOUSE Jouberin OS=Mus musculus OX=10090 GN=Ahi1 PE=1 SV=2
605650000	2007800000	571100000	1312500000	437010000	395490000	887650000	0.261209	0.485548	Ahnak	tr|E9Q616|E9Q616_MOUSE AHNAK nucleoprotein (desmoyokin) OS=Mus musculus OX=10090 GN=Ahnak PE=1 SV=1
5577300	8451200	2059700	7990000	174660	174660	3870800	0.366558	0.812963	Ahnak2	tr|Q3URZ6|Q3URZ6_MOUSE AHNAK nucleoprotein 2 OS=Mus musculus OX=10090 GN=Ahnak2 PE=1 SV=1
88755000	65286000	95419000	84441000	95878000	106180000	103730000	0.713472	-0.230475	Ahsa1	sp|Q8BK64|AHSA1_MOUSE Activator of 90 kDa heat shock protein ATPase homolog 1 OS=Mus musculus OX=10090 GN=Ahsa1 PE=1 SV=2
8231000	6678100	9764800	7640300	5393500	8360600	8144400	0.320011	0.155412	Ahsa2	sp|Q8N9S3|AHSA2_MOUSE Activator of 90 kDa heat shock protein ATPase homolog 2 OS=Mus musculus OX=10090 GN=Ahsa2 PE=1 SV=2
1127000000	1314300000	572860000	1338500000	1008800000	1117000000	497170000	0.0171503	0.0207576	Ahsg	sp|P29699|FETUA_MOUSE Alpha-2-HS-glycoprotein OS=Mus musculus OX=10090 GN=Ahsg PE=1 SV=1
8684800	9713700	4927600	5879600	7691200	11650000	7164500	0.0589183	-0.0583565	AI481877	sp|A2ALV5|SHOC1_MOUSE Protein shortage in chiasmata 1 ortholog OS=Mus musculus OX=10090 GN=Shoc1 PE=1 SV=1
9304300	12353000	14361000	10116000	9771000	18363000	12923000	0.108695	-0.0916152	Aida	sp|Q8C4Q6|AIDA_MOUSE Axin interactor, dorsalization-associated protein OS=Mus musculus OX=10090 GN=Aida PE=1 SV=1
174660	10730000	174660	174660	8890600	9401000	11828000	0.398637	-1.03614	Aif1	sp|O70200|AIF1_MOUSE Allograft inflammatory factor 1 OS=Mus musculus OX=10090 GN=Aif1 PE=1 SV=1
7742300	8748400	6140900	9004300	174660	4094800	4185800	0.67077	0.789359	Aif1l	sp|Q9EQX4|AIF1L_MOUSE Allograft inflammatory factor 1-like OS=Mus musculus OX=10090 GN=Aif1l PE=1 SV=1
115330000	124050000	114740000	96507000	114370000	95473000	98399000	1.46866	0.222248	Aifm1	sp|Q9Z0X1|AIFM1_MOUSE Apoptosis-inducing factor 1, mitochondrial OS=Mus musculus OX=10090 GN=Aifm1 PE=1 SV=1
12521000	18757000	11963000	4868700	10445000	18664000	17632000	0.13284	0.159795	Aifm2	sp|Q8BUE4|FSP1_MOUSE Ferroptosis suppressor protein 1 OS=Mus musculus OX=10090 GN=Aifm2 PE=1 SV=1
82139000	81850000	105420000	82027000	79750000	86584000	108570000	0.0188579	0.00919034	Aimp1	sp|P31230|AIMP1_MOUSE Aminoacyl tRNA synthase complex-interacting multifunctional protein 1 OS=Mus musculus OX=10090 GN=Aimp1 PE=1 SV=2
98186000	106560000	82982000	97698000	100760000	75367000	104690000	0.0457452	0.0193926	Aimp2	sp|Q8R010|AIMP2_MOUSE Aminoacyl tRNA synthase complex-interacting multifunctional protein 2 OS=Mus musculus OX=10090 GN=Aimp2 PE=1 SV=2
44879000	41269000	45004000	36481000	55344000	50378000	52797000	0.433961	-0.157197	Aip	sp|O08915|AIP_MOUSE AH receptor-interacting protein OS=Mus musculus OX=10090 GN=Aip PE=1 SV=1
20269000	17934000	22570000	15659000	18541000	18582000	22689000	0.27833	0.102546	Ak1	sp|Q9R0Y5|KAD1_MOUSE Adenylate kinase isoenzyme 1 OS=Mus musculus OX=10090 GN=Ak1 PE=1 SV=1
113700000	96118000	109080000	120970000	141370000	134540000	128480000	1.85362	-0.305174	Ak2	sp|Q9WTP6|KAD2_MOUSE Adenylate kinase 2, mitochondrial OS=Mus musculus OX=10090 GN=Ak2 PE=1 SV=5
55444000	71842000	73108000	49687000	56746000	48586000	56495000	1.3024	0.337124	Ak3	sp|Q9WTP7|KAD3_MOUSE GTP:AMP phosphotransferase AK3, mitochondrial OS=Mus musculus OX=10090 GN=Ak3 PE=1 SV=3
14690000	16686000	11096000	11334000	11096000	9023700	9147800	1.30782	0.480017	Ak4	sp|Q9WUR9|KAD4_MOUSE Adenylate kinase 4, mitochondrial OS=Mus musculus OX=10090 GN=Ak4 PE=1 SV=1
7029200	6412600	8293600	4726100	9515400	3884800	3818700	0.466879	0.401192	Ak6	sp|Q8VCP8|KAD6_MOUSE Adenylate kinase isoenzyme 6 OS=Mus musculus OX=10090 GN=Ak6 PE=1 SV=1
1526700	6329200	4932200	5009400	9430400	11285000	19630000	0.911231	-1.41142	Ak7	sp|Q9D2H2|KAD7_MOUSE Adenylate kinase 7 OS=Mus musculus OX=10090 GN=Ak7 PE=1 SV=1
174660	174660	174660	2135800	3874100	5925500	12786000	1.08795	-5.14507	Ak8	sp|Q32M07|KAD8_MOUSE Adenylate kinase 8 OS=Mus musculus OX=10090 GN=Ak8 PE=1 SV=1
174660	174660	2217400	989630	4624700	7163000	9632300	1.04832	-2.71108	Ak9	tr|G3UYQ4|G3UYQ4_MOUSE Nucleoside-diphosphate kinase OS=Mus musculus OX=10090 GN=Ak9 PE=1 SV=2
10041000	14371000	11488000	17906000	9081100	14650000	13925000	0.337307	-0.21508	Akap10	sp|O88845|AKA10_MOUSE A-kinase anchor protein 10, mitochondrial OS=Mus musculus OX=10090 GN=Akap10 PE=1 SV=3
9676200	12746000	11590000	16054000	10648000	9683200	10467000	0.0706335	-0.047027	Akap11	tr|E9Q777|E9Q777_MOUSE A kinase (PRKA) anchor protein 11 OS=Mus musculus OX=10090 GN=Akap11 PE=1 SV=2
281560000	413300000	398470000	288290000	273680000	281240000	287360000	1.17338	0.366716	Akap12	sp|Q9WTQ5|AKA12_MOUSE A-kinase anchor protein 12 OS=Mus musculus OX=10090 GN=Akap12 PE=1 SV=1
21286000	27529000	24189000	23675000	20071000	16188000	16294000	1.01019	0.352692	Akap13	sp|E9Q394|AKP13_MOUSE A-kinase anchor protein 13 OS=Mus musculus OX=10090 GN=Akap13 PE=1 SV=1
26218000	34834000	25332000	24973000	20343000	24156000	11929000	0.960084	0.500755	Akap2	sp|O54931|AKAP2_MOUSE A-kinase anchor protein 2 OS=Mus musculus OX=10090 GN=Akap2 PE=1 SV=3
174660	569270	920820	600600	174660	174660	174660	0.571144	0.980957	Akap3	sp|O88987|AKAP3_MOUSE A-kinase anchor protein 3 OS=Mus musculus OX=10090 GN=Akap3 PE=1 SV=2
4204700	5021700	3586500	174660	3401700	3163000	3392700	0.85023	0.753707	Akap7	sp|Q7TN79|AKA7G_MOUSE A-kinase anchor protein 7 isoform gamma OS=Mus musculus OX=10090 GN=Akap7 PE=1 SV=2
35625000	43398000	34277000	28654000	29099000	36298000	34272000	0.845764	0.235406	Akap8	sp|Q9DBR0|AKAP8_MOUSE A-kinase anchor protein 8 OS=Mus musculus OX=10090 GN=Akap8 PE=1 SV=1
25343000	23919000	27190000	29259000	24443000	22875000	25558000	0.00925174	-0.00281369	Akap8l	sp|Q9R0L7|AKP8L_MOUSE A-kinase anchor protein 8-like OS=Mus musculus OX=10090 GN=Akap8l PE=1 SV=1
40592000	27218000	36239000	34808000	15680000	12649000	16910000	1.08122	0.793381	Akap9	sp|Q70FJ1|AKAP9_MOUSE A-kinase anchor protein 9 OS=Mus musculus OX=10090 GN=Akap9 PE=1 SV=2
7470400	5027600	5290000	5468600	7361600	6173600	11449000	0.432008	-0.360633	Akirin2	sp|B1AXD8|AKIR2_MOUSE Akirin-2 OS=Mus musculus OX=10090 GN=Akirin2 PE=1 SV=1
266660000	321110000	265870000	250980000	289830000	247960000	274480000	0.424199	0.0982563	Akr1a1	sp|Q9JII6|AK1A1_MOUSE Aldo-keto reductase family 1 member A1 OS=Mus musculus OX=10090 GN=Akr1a1 PE=1 SV=3
1548400000	1705800000	1657700000	1232300000	1512700000	1530400000	1294300000	1.26735	0.233719	Akr1b1	sp|P45376|ALDR_MOUSE Aldo-keto reductase family 1 member B1 OS=Mus musculus OX=10090 GN=Akr1b1 PE=1 SV=3
81739000	102010000	84223000	73058000	51604000	58333000	177880000	0.00841778	-0.0143794	Akr1b7	sp|P21300|ALD1_MOUSE Aldo-keto reductase family 1 member B7 OS=Mus musculus OX=10090 GN=Akr1b7 PE=1 SV=4
589990000	610440000	574610000	539050000	531760000	478770000	391300000	1.30702	0.286178	Akr1b8	sp|P45377|ALD2_MOUSE Aldose reductase-related protein 2 OS=Mus musculus OX=10090 GN=Akr1b8 PE=1 SV=2
10468000	22455000	8432500	13454000	11213000	10177000	10592000	0.261809	0.279281	Akr1c13;Akr1c12	sp|Q8VC28|AK1CD_MOUSE Aldo-keto reductase family 1 member C13 OS=Mus musculus OX=10090 GN=Akr1c13 PE=1 SV=2;tr|Q9JLI0|Q9JLI0_MOUSE Aldo-keto reductase a OS=Mus musculus OX=10090 GN=Akr1c12 PE=1 SV=1
10523000	11243000	15242000	15216000	9524700	7039300	9873600	0.341532	0.244433	Akr1c14	tr|Q91WT7|Q91WT7_MOUSE 3-alpha-hydroxysteroid dehydrogenase type 1 OS=Mus musculus OX=10090 GN=Akr1c14 PE=1 SV=1
174660	18643000	23698000	20828000	174660	40878000	20441000	0.220682	-0.53824	Akr1c19	tr|G3X9Y6|G3X9Y6_MOUSE Aldo-keto reductase family 1, member C19 OS=Mus musculus OX=10090 GN=Akr1c19 PE=1 SV=1
174660	174660	174660	174660	174660	42482000	34454000	0.68346	-6.7895	Akr1c20	tr|Q8VC77|Q8VC77_MOUSE Akr1c20 protein OS=Mus musculus OX=10090 GN=Akr1c20 PE=1 SV=1
95313000	138530000	103420000	98676000	113170000	108710000	81751000	0.365808	0.160615	Akr1cl	tr|Q3UXL1|Q3UXL1_MOUSE Aldo-keto reductase family 1, member C-like OS=Mus musculus OX=10090 GN=Akr1cl PE=1 SV=1
102700000	143160000	82221000	217250000	116590000	52832000	53934000	0.00545035	-0.0103996	Akr1d1	sp|Q8VCX1|AK1D1_MOUSE Aldo-keto reductase family 1 member D1 OS=Mus musculus OX=10090 GN=Akr1d1 PE=1 SV=1
32796000	19262000	20787000	51034000	53110000	48851000	56242000	3.022	-1.1072	Akr1e2	sp|Q9DCT1|AKCL2_MOUSE 1,5-anhydro-D-fructose reductase OS=Mus musculus OX=10090 GN=Akr1e2 PE=1 SV=1
97549000	90588000	80663000	88204000	106200000	93388000	102430000	0.573967	-0.122724	Akr7a2	sp|Q8CG76|ARK72_MOUSE Aflatoxin B1 aldehyde reductase member 2 OS=Mus musculus OX=10090 GN=Akr7a2 PE=1 SV=3
19680000	16726000	14426000	15795000	12514000	12443000	9541000	1.10836	0.430417	Akt1	sp|P31750|AKT1_MOUSE RAC-alpha serine/threonine-protein kinase OS=Mus musculus OX=10090 GN=Akt1 PE=1 SV=2
22288000	35542000	35753000	31516000	17997000	18316000	13908000	0.899595	0.610295	Akt1s1	sp|Q9D1F4|AKTS1_MOUSE Proline-rich AKT1 substrate 1 OS=Mus musculus OX=10090 GN=Akt1s1 PE=1 SV=1
44425000	54323000	59563000	44523000	37677000	54506000	37175000	0.732432	0.279699	Akt2	sp|Q60823|AKT2_MOUSE RAC-beta serine/threonine-protein kinase OS=Mus musculus OX=10090 GN=Akt2 PE=1 SV=1
3599200	4883700	2330100	3566300	3093300	3991200	3274600	0.0658721	0.0500856	Akt3	sp|Q9WUA6|AKT3_MOUSE RAC-gamma serine/threonine-protein kinase OS=Mus musculus OX=10090 GN=Akt3 PE=1 SV=1
194710000	231440000	223480000	261710000	312340000	231470000	242430000	0.970853	-0.274842	Alad	sp|P10518|HEM2_MOUSE Delta-aminolevulinic acid dehydratase OS=Mus musculus OX=10090 GN=Alad PE=1 SV=1
4403100000	6506200000	5094800000	4901800000	4339700000	3590600000	4026400000	0.897072	0.340003	Alb	sp|P07724|ALBU_MOUSE Albumin OS=Mus musculus OX=10090 GN=Alb PE=1 SV=3
24340000	28294000	31067000	14563000	13548000	17487000	18530000	2.57506	0.799328	Alcam	sp|Q61490|CD166_MOUSE CD166 antigen OS=Mus musculus OX=10090 GN=Alcam PE=1 SV=3
30348000	33598000	29301000	30894000	34983000	37160000	31703000	0.589746	-0.116011	Aldh16a1	sp|Q571I9|A16A1_MOUSE Aldehyde dehydrogenase family 16 member A1 OS=Mus musculus OX=10090 GN=Aldh16a1 PE=1 SV=2
34654000	42355000	38727000	30707000	37319000	42790000	30794000	0.343114	0.123952	Aldh18a1	sp|Q9Z110|P5CS_MOUSE Delta-1-pyrroline-5-carboxylate synthase OS=Mus musculus OX=10090 GN=Aldh18a1 PE=1 SV=2
878850000	1028400000	1088500000	1127300000	1069400000	1143200000	1133600000	1.07385	-0.163449	Aldh1a1	sp|P24549|AL1A1_MOUSE Retinal dehydrogenase 1 OS=Mus musculus OX=10090 GN=Aldh1a1 PE=1 SV=5
119160000	88007000	117670000	125400000	138940000	135200000	173890000	1.16755	-0.404864	Aldh1a2	sp|Q62148|AL1A2_MOUSE Retinal dehydrogenase 2 OS=Mus musculus OX=10090 GN=Aldh1a2 PE=1 SV=2
22024000	28409000	22986000	34007000	29904000	35181000	33349000	2.00443	-0.436087	Aldh1a7	sp|O35945|AL1A7_MOUSE Aldehyde dehydrogenase, cytosolic 1 OS=Mus musculus OX=10090 GN=Aldh1a7 PE=1 SV=1
106080000	117070000	104650000	119110000	114640000	104020000	121380000	0.430825	-0.0711122	Aldh1b1	sp|Q9CZS1|AL1B1_MOUSE Aldehyde dehydrogenase X, mitochondrial OS=Mus musculus OX=10090 GN=Aldh1b1 PE=1 SV=1
26395000	24600000	21536000	32254000	27344000	37849000	34333000	1.55641	-0.446424	Aldh1l1	sp|Q8R0Y6|AL1L1_MOUSE Cytosolic 10-formyltetrahydrofolate dehydrogenase OS=Mus musculus OX=10090 GN=Aldh1l1 PE=1 SV=1
479550000	499270000	418600000	489000000	475030000	458320000	441350000	0.00164945	-0.000366455	Aldh2	sp|P47738|ALDH2_MOUSE Aldehyde dehydrogenase, mitochondrial OS=Mus musculus OX=10090 GN=Aldh2 PE=1 SV=1
14928000	11740000	6341900	9954900	17082000	9948300	11537000	0.146662	-0.140709	Aldh3a1	sp|P47739|AL3A1_MOUSE Aldehyde dehydrogenase, dimeric NADP-preferring OS=Mus musculus OX=10090 GN=Aldh3a1 PE=1 SV=2
60861000	58383000	72449000	56019000	66388000	61236000	49981000	0.437155	0.129647	Aldh3a2	sp|P47740|AL3A2_MOUSE Aldehyde dehydrogenase family 3 member A2 OS=Mus musculus OX=10090 GN=Aldh3a2 PE=1 SV=2
41745000	47056000	55812000	44037000	43510000	41843000	37115000	0.815708	0.211669	Aldh4a1	sp|Q8CHT0|AL4A1_MOUSE Delta-1-pyrroline-5-carboxylate dehydrogenase, mitochondrial OS=Mus musculus OX=10090 GN=Aldh4a1 PE=1 SV=3
77838000	69783000	82315000	55826000	61896000	60380000	46854000	2.00586	0.446627	Aldh5a1	sp|Q8BWF0|SSDH_MOUSE Succinate-semialdehyde dehydrogenase, mitochondrial OS=Mus musculus OX=10090 GN=Aldh5a1 PE=1 SV=1
172720000	215390000	173470000	136940000	145620000	178680000	161700000	0.968855	0.265436	Aldh6a1	sp|Q9EQ20|MMSA_MOUSE Methylmalonate-semialdehyde dehydrogenase [acylating], mitochondrial OS=Mus musculus OX=10090 GN=Aldh6a1 PE=1 SV=1
106910000	125930000	186230000	114770000	100770000	163750000	211970000	0.0807407	-0.0815639	Aldh7a1	sp|Q9DBF1|AL7A1_MOUSE Alpha-aminoadipic semialdehyde dehydrogenase OS=Mus musculus OX=10090 GN=Aldh7a1 PE=1 SV=4
155700000	119440000	134540000	148750000	186050000	129880000	104850000	0.0955725	-0.0602369	Aldh9a1	sp|Q9JLJ2|AL9A1_MOUSE 4-trimethylaminobutyraldehyde dehydrogenase OS=Mus musculus OX=10090 GN=Aldh9a1 PE=1 SV=1
784610000	965650000	996910000	848040000	795290000	764410000	717990000	1.04421	0.228791	Aldoa	sp|P05064|ALDOA_MOUSE Fructose-bisphosphate aldolase A OS=Mus musculus OX=10090 GN=Aldoa PE=1 SV=2
174660	174660	13910000	3009100	174660	174660	174660	0.43295	2.42794	Aldoart1	tr|A6ZI46|A6ZI46_MOUSE Fructose-bisphosphate aldolase OS=Mus musculus OX=10090 GN=Aldoart1 PE=1 SV=1
174660	174660	174660	174660	174660	174660	3565700	0.359928	-2.54937	Aldoart2	tr|A6ZI47|A6ZI47_MOUSE Fructose-bisphosphate aldolase OS=Mus musculus OX=10090 GN=Aldoart2 PE=1 SV=1
14847000	17801000	18746000	16756000	17463000	19070000	26758000	0.437438	-0.22421	Aldoc	sp|P05063|ALDOC_MOUSE Fructose-bisphosphate aldolase C OS=Mus musculus OX=10090 GN=Aldoc PE=1 SV=4
7951100	9193800	7758100	8543700	6417800	17609000	8426400	0.265541	-0.304158	Alg1	sp|Q921Q3|ALG1_MOUSE Chitobiosyldiphosphodolichol beta-mannosyltransferase OS=Mus musculus OX=10090 GN=Alg1 PE=1 SV=3
8036500	174660	8998600	174660	174660	5076700	7766600	0.314704	0.798533	Alg11	sp|Q3TZM9|ALG11_MOUSE GDP-Man:Man(3)GlcNAc(2)-PP-Dol alpha-1,2-mannosyltransferase OS=Mus musculus OX=10090 GN=Alg11 PE=2 SV=1
35020000	35464000	34530000	36950000	32056000	36159000	48655000	0.345623	-0.135624	Alg2	sp|Q9DBE8|ALG2_MOUSE Alpha-1,3/1,6-mannosyltransferase ALG2 OS=Mus musculus OX=10090 GN=Alg2 PE=1 SV=2
18942000	23945000	21130000	18481000	21091000	19952000	23026000	0.161086	0.0482244	Alg5	sp|Q9DB25|ALG5_MOUSE Dolichyl-phosphate beta-glucosyltransferase OS=Mus musculus OX=10090 GN=Alg5 PE=1 SV=1
174660	4131600	4945900	6710900	7551200	21505000	24519000	1.06641	-2.28893	Alg8	sp|Q6P8H8|ALG8_MOUSE Probable dolichyl pyrophosphate Glc1Man9GlcNAc2 alpha-1,3-glucosyltransferase OS=Mus musculus OX=10090 GN=Alg8 PE=2 SV=2
174660	174660	3495000	174660	174660	6087800	6902100	0.373098	-1.37984	Alg9	sp|Q8VDI9|ALG9_MOUSE Alpha-1,2-mannosyltransferase ALG9 OS=Mus musculus OX=10090 GN=Alg9 PE=2 SV=1
19904000	13823000	19740000	15975000	21206000	25259000	18395000	0.349761	-0.181294	Alkbh5	sp|Q3TSG4|ALKB5_MOUSE RNA demethylase ALKBH5 OS=Mus musculus OX=10090 GN=Alkbh5 PE=1 SV=2
28949000	174660	174660	12005000	17101000	18082000	35600000	0.485057	-1.08357	Alkbh7	sp|Q9D6Z0|ALKB7_MOUSE Alpha-ketoglutarate-dependent dioxygenase alkB homolog 7, mitochondrial OS=Mus musculus OX=10090 GN=Alkbh7 PE=1 SV=1
6915000	7326900	5086200	7430700	3794600	4439700	2650000	0.653251	0.492712	Alms1	sp|Q8K4E0|ALMS1_MOUSE Alstrom syndrome protein 1 homolog OS=Mus musculus OX=10090 GN=Alms1 PE=1 SV=2
30528000	35133000	29374000	40674000	31412000	45140000	48095000	1.05803	-0.383702	Alpl	sp|P09242|PPBT_MOUSE Alkaline phosphatase, tissue-nonspecific isozyme OS=Mus musculus OX=10090 GN=Alpl PE=1 SV=2
174660	4209600	7781100	6180500	6649100	174660	11011000	0.243658	-0.566135	Als2	sp|Q920R0|ALS2_MOUSE Alsin OS=Mus musculus OX=10090 GN=Als2 PE=1 SV=3
381380000	373430000	357530000	364520000	325610000	313770000	318640000	1.36806	0.165324	Alyref	sp|O08583|THOC4_MOUSE THO complex subunit 4 OS=Mus musculus OX=10090 GN=Alyref PE=1 SV=3
174660	174660	174660	174660	174660	6964700	6366700	0.690543	-4.29145	Alyref2	sp|Q9JJW6|ALRF2_MOUSE Aly/REF export factor 2 OS=Mus musculus OX=10090 GN=Alyref2 PE=1 SV=1
12774000	20156000	13986000	14083000	15283000	12753000	14877000	0.281791	0.134257	Amacr	sp|O09174|AMACR_MOUSE Alpha-methylacyl-CoA racemase OS=Mus musculus OX=10090 GN=Amacr PE=1 SV=4
174660	174660	174660	174660	4833400	174660	3526200	0.671413	-3.63987	Ambra1	sp|A2AH22|AMRA1_MOUSE Activating molecule in BECN1-regulated autophagy protein 1 OS=Mus musculus OX=10090 GN=Ambra1 PE=1 SV=1
14443000	12197000	29749000	33588000	23868000	28518000	47580000	0.943792	-0.8289	Amdhd2	sp|Q8JZV7|NAGA_MOUSE N-acetylglucosamine-6-phosphate deacetylase OS=Mus musculus OX=10090 GN=Amdhd2 PE=1 SV=1
10920000	16687000	16068000	11792000	12548000	21926000	17317000	0.160394	-0.126796	Amfr	sp|Q9R049|AMFR_MOUSE E3 ubiquitin-protein ligase AMFR OS=Mus musculus OX=10090 GN=Amfr PE=1 SV=2
17289000	20140000	16874000	26486000	25094000	18677000	27623000	1.28012	-0.434945	Amhr2	sp|Q8K592|AMHR2_MOUSE Anti-Muellerian hormone type-2 receptor OS=Mus musculus OX=10090 GN=Amhr2 PE=1 SV=2
25896000	12661000	16908000	26124000	23553000	23394000	40560000	0.822478	-0.619669	Amn1	sp|B8JKV0|AMN1_MOUSE Protein AMN1 homolog OS=Mus musculus OX=10090 GN=Amn1 PE=1 SV=1
21960000	15514000	16451000	14006000	12785000	10081000	16514000	0.994086	0.42953	Ampd2	sp|Q9DBT5|AMPD2_MOUSE AMP deaminase 2 OS=Mus musculus OX=10090 GN=Ampd2 PE=1 SV=1
7496400	7779600	7182900	5059600	3190000	6242000	3040300	1.69597	0.772342	Ampd3	sp|O08739|AMPD3_MOUSE AMP deaminase 3 OS=Mus musculus OX=10090 GN=Ampd3 PE=1 SV=2
21468000	21473000	19020000	15724000	18783000	15113000	20576000	0.912177	0.235009	Anapc1	sp|P53995|APC1_MOUSE Anaphase-promoting complex subunit 1 OS=Mus musculus OX=10090 GN=Anapc1 PE=1 SV=2
174660	174660	174660	9414300	12543000	7259600	669780	1.23905	-5.41881	Anapc10	sp|Q8K2H6|APC10_MOUSE Anaphase-promoting complex subunit 10 OS=Mus musculus OX=10090 GN=Anapc10 PE=1 SV=1
12687000	2517000	9109100	9905100	8795900	6500100	9084100	0.0622761	-0.0808146	Anapc4	sp|Q91W96|APC4_MOUSE Anaphase-promoting complex subunit 4 OS=Mus musculus OX=10090 GN=Anapc4 PE=1 SV=1
12551000	10401000	11594000	5862400	11148000	8313700	6996100	1.19871	0.51112	Anapc5	sp|Q8BTZ4|APC5_MOUSE Anaphase-promoting complex subunit 5 OS=Mus musculus OX=10090 GN=Anapc5 PE=1 SV=1
6252600	174660	174660	5151000	4737200	8196100	6503100	1.01631	-1.48192	Anapc7	sp|Q9WVM3|APC7_MOUSE Anaphase-promoting complex subunit 7 OS=Mus musculus OX=10090 GN=Anapc7 PE=1 SV=3
174660	174660	174660	2633300	2000800	5912800	9349000	1.20906	-4.83178	Angel1	sp|Q8VCU0|ANGE1_MOUSE Protein angel homolog 1 OS=Mus musculus OX=10090 GN=Angel1 PE=1 SV=2
10522000	3701300	13606000	7260700	6403700	8025200	16169000	0.0174574	-0.0289789	Angel2	sp|Q8K1C0|ANGE2_MOUSE Protein angel homolog 2 OS=Mus musculus OX=10090 GN=Angel2 PE=1 SV=1
174660	174660	174660	174660	174660	174660	174660	#DIV/0!	0	Ank1	sp|Q02357|ANK1_MOUSE Ankyrin-1 OS=Mus musculus OX=10090 GN=Ank1 PE=1 SV=2
2718700	24902000	10649000	16458000	11963000	17783000	15997000	0.193328	-0.285698	Ank2	sp|Q8C8R3|ANK2_MOUSE Ankyrin-2 OS=Mus musculus OX=10090 GN=Ank2 PE=1 SV=2
9003900	14211000	8081900	9553200	10496000	7187000	8096100	0.377062	0.240065	Ank3	sp|G5E8K5|ANK3_MOUSE Ankyrin-3 OS=Mus musculus OX=10090 GN=Ank3 PE=1 SV=1
42744000	40797000	34164000	30160000	38860000	36470000	46661000	0.0945699	0.0447093	Ankfy1	sp|Q810B6|ANFY1_MOUSE Rabankyrin-5 OS=Mus musculus OX=10090 GN=Ankfy1 PE=1 SV=2
15360000	18220000	14852000	12096000	13450000	10712000	10781000	1.88331	0.457141	Ankhd1	tr|E9PUR0|E9PUR0_MOUSE Ankyrin repeat and KH domain-containing 1 OS=Mus musculus OX=10090 GN=Ankhd1 PE=1 SV=1
15379000	13065000	16485000	5911800	174660	5680800	8157400	2.22978	1.58813	Ankib1	sp|Q6ZPS6|AKIB1_MOUSE Ankyrin repeat and IBR domain-containing protein 1 OS=Mus musculus OX=10090 GN=Ankib1 PE=1 SV=2
23666000	16014000	21201000	23964000	22043000	20412000	25585000	0.531671	-0.180667	Ankle2	sp|Q6P1H6|ANKL2_MOUSE Ankyrin repeat and LEM domain-containing protein 2 OS=Mus musculus OX=10090 GN=Ankle2 PE=1 SV=2
39918000	36277000	49611000	40607000	47849000	67024000	59216000	0.72574	-0.356057	Ankrd13a	sp|Q80UP5|AN13A_MOUSE Ankyrin repeat domain-containing protein 13A OS=Mus musculus OX=10090 GN=Ankrd13a PE=1 SV=2
11525000	12152000	19312000	15852000	17139000	27285000	26660000	0.869348	-0.600949	Ankrd13d	sp|Q6PD24|AN13D_MOUSE Ankyrin repeat domain-containing protein 13D OS=Mus musculus OX=10090 GN=Ankrd13d PE=1 SV=2
26081000	33738000	20622000	22515000	18818000	20955000	18935000	0.959686	0.40108	Ankrd17	sp|Q99NH0|ANR17_MOUSE Ankyrin repeat domain-containing protein 17 OS=Mus musculus OX=10090 GN=Ankrd17 PE=1 SV=2
4413000	7217200	8539600	5481700	4906600	174660	9767100	0.262737	0.40362	Ankrd27	sp|Q3UMR0|ANR27_MOUSE Ankyrin repeat domain-containing protein 27 OS=Mus musculus OX=10090 GN=Ankrd27 PE=1 SV=2
16358000	13099000	16651000	18175000	17033000	17601000	23915000	0.881909	-0.319623	Ankrd28	sp|Q505D1|ANR28_MOUSE Serine/threonine-protein phosphatase 6 regulatory ankyrin repeat subunit A OS=Mus musculus OX=10090 GN=Ankrd28 PE=1 SV=1
14677000	14589000	7104700	21774000	14233000	12279000	14657000	0.50206	-0.376232	Ankrd36	tr|D3Z4K0|D3Z4K0_MOUSE Ankyrin repeat domain 36 OS=Mus musculus OX=10090 GN=Ankrd36 PE=1 SV=1
174660	5606800	8282800	7168300	5022200	174660	174660	0.211977	0.580555	Ankrd40	sp|Q5SUE8|ANR40_MOUSE Ankyrin repeat domain-containing protein 40 OS=Mus musculus OX=10090 GN=Ankrd40 PE=1 SV=1
4184700	13087000	6219800	5689100	5708800	5049400	21454000	0.11568	-0.275071	Ankrd42	sp|Q3V096|ANR42_MOUSE Ankyrin repeat domain-containing protein 42 OS=Mus musculus OX=10090 GN=Ankrd42 PE=1 SV=1
3883700	1921200	174660	174660	174660	8342700	5693300	0.250146	-0.851449	Ankrd45	sp|Q810N6|ANR45_MOUSE Ankyrin repeat domain-containing protein 45 OS=Mus musculus OX=10090 GN=Ankrd45 PE=1 SV=1
24804000	24896000	18662000	14969000	19617000	20849000	20167000	0.802761	0.269808	Ankrd49	sp|Q8VE42|ANR49_MOUSE Ankyrin repeat domain-containing protein 49 OS=Mus musculus OX=10090 GN=Ankrd49 PE=1 SV=1
7258000	12721000	5223700	7624100	3490600	8992100	12071000	0.0436929	0.0625501	Anks1a	sp|P59672|ANS1A_MOUSE Ankyrin repeat and SAM domain-containing protein 1A OS=Mus musculus OX=10090 GN=Anks1a PE=1 SV=3
64126000	47894000	41282000	48362000	48867000	57043000	57425000	0.103999	-0.0505868	Anln	sp|Q8K298|ANLN_MOUSE Anillin OS=Mus musculus OX=10090 GN=Anln PE=1 SV=2
24684000	31811000	29572000	174660	38427000	174660	11440000	0.707415	1.19234	Ano1	sp|Q8BHY3|ANO1_MOUSE Anoctamin-1 OS=Mus musculus OX=10090 GN=Ano1 PE=1 SV=2
22999000	15522000	18147000	18270000	24176000	35546000	25660000	0.723452	-0.456104	Ano10	sp|Q8BH79|ANO10_MOUSE Anoctamin-10 OS=Mus musculus OX=10090 GN=Ano10 PE=1 SV=1
231210000	255470000	327620000	206040000	218500000	163550000	159300000	1.43147	0.538737	Anp32a	sp|O35381|AN32A_MOUSE Acidic leucine-rich nuclear phosphoprotein 32 family member A OS=Mus musculus OX=10090 GN=Anp32a PE=1 SV=1
500350000	662140000	619210000	548830000	552210000	394410000	417010000	0.882875	0.312862	Anp32b	sp|Q9EST5|AN32B_MOUSE Acidic leucine-rich nuclear phosphoprotein 32 family member B OS=Mus musculus OX=10090 GN=Anp32b PE=1 SV=1
216000000	242180000	247300000	216610000	213570000	182400000	82005000	0.775119	0.437491	Anp32e	sp|P97822|AN32E_MOUSE Acidic leucine-rich nuclear phosphoprotein 32 family member E OS=Mus musculus OX=10090 GN=Anp32e PE=1 SV=2
21591000	27516000	24916000	11777000	12395000	13666000	15836000	2.83164	0.878788	Anpep	sp|P97449|AMPN_MOUSE Aminopeptidase N OS=Mus musculus OX=10090 GN=Anpep PE=1 SV=4
62884000	67487000	75357000	60310000	64449000	32850000	48887000	0.938289	0.409662	Anxa1	sp|P10107|ANXA1_MOUSE Annexin A1 OS=Mus musculus OX=10090 GN=Anxa1 PE=1 SV=2
56865000	57806000	56153000	47420000	42496000	41336000	45642000	3.16496	0.364663	Anxa11	sp|P97384|ANX11_MOUSE Annexin A11 OS=Mus musculus OX=10090 GN=Anxa11 PE=1 SV=2
23301000	174660	174660	174660	7805700	174660	174660	0.361846	1.92056	Anxa13	sp|Q99JG3|ANX13_MOUSE Annexin A13 OS=Mus musculus OX=10090 GN=Anxa13 PE=1 SV=3
717250000	880800000	934340000	625680000	673950000	666390000	557960000	1.70706	0.419837	Anxa2	sp|P07356|ANXA2_MOUSE Annexin A2 OS=Mus musculus OX=10090 GN=Anxa2 PE=1 SV=2
40678000	26119000	45739000	21923000	16048000	32990000	21220000	1.11955	0.702883	Anxa3	sp|O35639|ANXA3_MOUSE Annexin A3 OS=Mus musculus OX=10090 GN=Anxa3 PE=1 SV=4
61633000	83993000	91265000	52312000	62159000	63549000	75125000	0.817843	0.319297	Anxa4	sp|P97429|ANXA4_MOUSE Annexin A4 OS=Mus musculus OX=10090 GN=Anxa4 PE=1 SV=4
960650000	1323800000	1327900000	1003700000	973160000	759560000	768210000	1.29944	0.458713	Anxa5	sp|P48036|ANXA5_MOUSE Annexin A5 OS=Mus musculus OX=10090 GN=Anxa5 PE=1 SV=1
114880000	136480000	113390000	109370000	92091000	88539000	95115000	1.55385	0.336656	Anxa6	sp|P14824|ANXA6_MOUSE Annexin A6 OS=Mus musculus OX=10090 GN=Anxa6 PE=1 SV=3
66807000	89743000	88020000	54229000	65614000	67510000	71135000	1.12605	0.335188	Anxa7	sp|Q07076|ANXA7_MOUSE Annexin A7 OS=Mus musculus OX=10090 GN=Anxa7 PE=1 SV=2
76890000	93841000	72576000	50959000	55873000	60306000	56792000	2.09825	0.534768	Aoc3	sp|O70423|AOC3_MOUSE Membrane primary amine oxidase OS=Mus musculus OX=10090 GN=Aoc3 PE=1 SV=3
8211800	4374800	4087300	4518300	5487400	4897000	9040200	0.0933787	-0.106969	Ap1ar	tr|E9PYF7|E9PYF7_MOUSE AP1AR OS=Mus musculus OX=10090 GN=Ap1ar PE=1 SV=1
112870000	92784000	99690000	115510000	103290000	128760000	104070000	0.596413	-0.149668	Ap1b1	sp|O35643|AP1B1_MOUSE AP-1 complex subunit beta-1 OS=Mus musculus OX=10090 GN=Ap1b1 PE=1 SV=2
29280000	18175000	22487000	23225000	24802000	29144000	33672000	0.511121	-0.249249	Ap1g1	sp|P22892|AP1G1_MOUSE AP-1 complex subunit gamma-1 OS=Mus musculus OX=10090 GN=Ap1g1 PE=1 SV=3
86177000	69815000	73699000	77115000	80505000	94517000	104500000	0.695124	-0.219725	Ap1m1	sp|P35585|AP1M1_MOUSE AP-1 complex subunit mu-1 OS=Mus musculus OX=10090 GN=Ap1m1 PE=1 SV=3
20512000	24031000	18768000	18102000	25391000	21458000	24990000	0.229339	-0.0914852	Ap1s1	sp|P61967|AP1S1_MOUSE AP-1 complex subunit sigma-1A OS=Mus musculus OX=10090 GN=Ap1s1 PE=1 SV=1
16524000	12916000	18234000	13395000	12646000	19472000	32010000	0.258991	-0.286384	Ap1s2	sp|Q9DB50|AP1S2_MOUSE AP-1 complex subunit sigma-2 OS=Mus musculus OX=10090 GN=Ap1s2 PE=1 SV=1
107410000	95317000	93324000	99639000	90226000	100280000	101850000	0.0493391	0.010048	Ap2a1	sp|P17426|AP2A1_MOUSE AP-2 complex subunit alpha-1 OS=Mus musculus OX=10090 GN=Ap2a1 PE=1 SV=1
25176000	27753000	26223000	22001000	25153000	24904000	21483000	1.16693	0.174064	Ap2a2	sp|P17427|AP2A2_MOUSE AP-2 complex subunit alpha-2 OS=Mus musculus OX=10090 GN=Ap2a2 PE=1 SV=2
166080000	139740000	145430000	141430000	155620000	151550000	135630000	0.197692	0.042428	Ap2b1	sp|Q9DBG3|AP2B1_MOUSE AP-2 complex subunit beta OS=Mus musculus OX=10090 GN=Ap2b1 PE=1 SV=1
69236000	75021000	69665000	65614000	68613000	71134000	65292000	0.777621	0.075678	Ap2m1	sp|P84091|AP2M1_MOUSE AP-2 complex subunit mu OS=Mus musculus OX=10090 GN=Ap2m1 PE=1 SV=1
26517000	16015000	18561000	16434000	17662000	21680000	16534000	0.31581	0.171849	Ap2s1	sp|P62743|AP2S1_MOUSE AP-2 complex subunit sigma OS=Mus musculus OX=10090 GN=Ap2s1 PE=1 SV=1
29190000	31379000	33298000	26914000	32998000	31541000	28260000	0.288314	0.0641476	Ap3b1	sp|Q9Z1T1|AP3B1_MOUSE AP-3 complex subunit beta-1 OS=Mus musculus OX=10090 GN=Ap3b1 PE=1 SV=2
5291400	4525200	12292000	5419200	7732600	10326000	14140000	0.274607	-0.35177	Ap3b2	sp|Q9JME5|AP3B2_MOUSE AP-3 complex subunit beta-2 OS=Mus musculus OX=10090 GN=Ap3b2 PE=1 SV=2
65508000	66387000	84182000	67823000	70858000	65812000	63564000	0.401479	0.104043	Ap3d1	sp|O54774|AP3D1_MOUSE AP-3 complex subunit delta-1 OS=Mus musculus OX=10090 GN=Ap3d1 PE=1 SV=1
24621000	28433000	25195000	22814000	26597000	29137000	26309000	0.0242892	-0.00724146	Ap3m1	sp|Q9JKC8|AP3M1_MOUSE AP-3 complex subunit mu-1 OS=Mus musculus OX=10090 GN=Ap3m1 PE=1 SV=1
39081000	43682000	40570000	55172000	40430000	31140000	32559000	0.0687702	0.045841	Ap3s1	sp|Q9DCR2|AP3S1_MOUSE AP-3 complex subunit sigma-1 OS=Mus musculus OX=10090 GN=Ap3s1 PE=1 SV=2
156930000	66960000	174660	174660	174660	174660	174660	0.970003	8.74019	Ap3s2	sp|Q8BSZ2|AP3S2_MOUSE AP-3 complex subunit sigma-2 OS=Mus musculus OX=10090 GN=Ap3s2 PE=1 SV=1
174660	174660	174660	174660	174660	174660	4217800	0.359928	-2.76281	Ap4e1	sp|Q80V94|AP4E1_MOUSE AP-4 complex subunit epsilon-1 OS=Mus musculus OX=10090 GN=Ap4e1 PE=1 SV=3
9105700	4898800	8036600	174660	7349700	12473000	5924100	0.0992646	0.181087	Ap4m1	sp|Q9JKC7|AP4M1_MOUSE AP-4 complex subunit mu-1 OS=Mus musculus OX=10090 GN=Ap4m1 PE=1 SV=1
2267400	1659200	1176900	2535200	2624300	2626600	5834400	0.83211	-1.00118	Ap4s1	sp|Q9WVL1|AP4S1_MOUSE AP-4 complex subunit sigma-1 OS=Mus musculus OX=10090 GN=Ap4s1 PE=2 SV=1
174660	174660	174660	174660	174660	174660	174660	#DIV/0!	0	Apaf1	sp|O88879|APAF_MOUSE Apoptotic protease-activating factor 1 OS=Mus musculus OX=10090 GN=Apaf1 PE=1 SV=3
9083100	2477700	5714600	7947300	7758200	6921400	4252600	0.199181	-0.22275	Apba1	sp|B2RUJ5|APBA1_MOUSE Amyloid-beta A4 precursor protein-binding family A member 1 OS=Mus musculus OX=10090 GN=Apba1 PE=1 SV=2
18308000	32155000	12980000	25567000	24333000	13625000	11715000	0.137146	0.168999	Apcs	sp|P12246|SAMP_MOUSE Serum amyloid P-component OS=Mus musculus OX=10090 GN=Apcs PE=1 SV=2
34427000	30317000	32695000	34886000	30615000	38631000	38319000	0.596788	-0.132857	Apeh	sp|Q8R146|APEH_MOUSE Acylamino-acid-releasing enzyme OS=Mus musculus OX=10090 GN=Apeh PE=1 SV=3
99824000	88183000	107280000	69020000	76082000	73370000	86667000	1.7362	0.367689	Apex1	sp|P28352|APEX1_MOUSE DNA-(apurinic or apyrimidinic site) endonuclease OS=Mus musculus OX=10090 GN=Apex1 PE=1 SV=2
247130000	204880000	260190000	257160000	263450000	196190000	215170000	0.0653191	0.0270364	Api5	sp|O35841|API5_MOUSE Apoptosis inhibitor 5 OS=Mus musculus OX=10090 GN=Api5 PE=1 SV=2
27836000	24740000	27753000	36000000	45411000	37083000	41657000	2.34973	-0.580402	Apip	sp|Q9WVQ5|MTNB_MOUSE Methylthioribulose-1-phosphate dehydratase OS=Mus musculus OX=10090 GN=Apip PE=1 SV=1
17010000	15118000	18852000	17820000	13173000	10031000	11271000	0.863632	0.378296	Aplf	sp|Q9D842|APLF_MOUSE Aprataxin and PNK-like factor OS=Mus musculus OX=10090 GN=Aplf PE=1 SV=2
41723000	32491000	31537000	39155000	49249000	37137000	59879000	0.792551	-0.395088	Aplp2	sp|Q06335|APLP2_MOUSE Amyloid-like protein 2 OS=Mus musculus OX=10090 GN=Aplp2 PE=1 SV=4
40040000	38845000	31703000	37740000	41217000	31482000	28230000	0.210521	0.088587	Apmap	sp|Q9D7N9|APMAP_MOUSE Adipocyte plasma membrane-associated protein OS=Mus musculus OX=10090 GN=Apmap PE=1 SV=1
511800000	590810000	643520000	454310000	562030000	450570000	801110000	0.0511075	0.0377651	Apoa1	sp|Q00623|APOA1_MOUSE Apolipoprotein A-I OS=Mus musculus OX=10090 GN=Apoa1 PE=1 SV=2
128210000	138850000	125960000	138130000	136180000	138820000	122940000	0.214988	-0.0327812	Apoa1bp	sp|Q8K4Z3|NNRE_MOUSE NAD(P)H-hydrate epimerase OS=Mus musculus OX=10090 GN=Naxe PE=1 SV=1
123750000	147200000	197270000	154250000	285170000	249420000	340920000	1.01095	-0.722012	Apoa2	sp|P09813|APOA2_MOUSE Apolipoprotein A-II OS=Mus musculus OX=10090 GN=Apoa2 PE=1 SV=2
231510000	424500000	954930000	362620000	275810000	275890000	268710000	0.612048	0.860454	Apoa4	sp|P06728|APOA4_MOUSE Apolipoprotein A-IV OS=Mus musculus OX=10090 GN=Apoa4 PE=1 SV=3
174660	3774700	10084000	6686800	8996700	6757700	26009000	0.565248	-1.3726	Apoc1	sp|P34928|APOC1_MOUSE Apolipoprotein C-I OS=Mus musculus OX=10090 GN=Apoc1 PE=1 SV=1
174660	10050000	174660	9211400	7933800	174660	12128000	0.415413	-1.08664	Apoc3	sp|P33622|APOC3_MOUSE Apolipoprotein C-III OS=Mus musculus OX=10090 GN=Apoc3 PE=1 SV=2
17592000	12692000	13746000	13786000	8196500	4427100	174660	1.10567	1.14295	Apod	sp|P51910|APOD_MOUSE Apolipoprotein D OS=Mus musculus OX=10090 GN=Apod PE=1 SV=1
34743000	42348000	49616000	46103000	44634000	38678000	51725000	0.257625	-0.100571	Apoe	sp|P08226|APOE_MOUSE Apolipoprotein E OS=Mus musculus OX=10090 GN=Apoe PE=1 SV=2
30067000	55086000	25305000	23483000	18535000	29221000	21195000	0.810587	0.67204	Apoh	sp|Q01339|APOH_MOUSE Beta-2-glycoprotein 1 OS=Mus musculus OX=10090 GN=Apoh PE=1 SV=1
41487000	37448000	41909000	35854000	59945000	45021000	51379000	0.582999	-0.254417	Apoo	sp|Q9DCZ4|MIC26_MOUSE MICOS complex subunit Mic26 OS=Mus musculus OX=10090 GN=Apoo PE=1 SV=2
59626000	53310000	55217000	50001000	54710000	52492000	39104000	0.763277	0.1917	Apool	sp|Q78IK4|MIC27_MOUSE MICOS complex subunit Mic27 OS=Mus musculus OX=10090 GN=Apool PE=1 SV=1
9216500	8029500	5934700	5284600	7811200	5644500	8269000	0.343593	0.194505	App	sp|P12023|A4_MOUSE Amyloid-beta A4 protein OS=Mus musculus OX=10090 GN=App PE=1 SV=3
6520800	174660	12411000	174660	10226000	12531000	8249300	0.121608	-0.291567	Appbp2	sp|Q9DAX9|APBP2_MOUSE Amyloid protein-binding protein 2 OS=Mus musculus OX=10090 GN=Appbp2 PE=2 SV=1
50885000	52868000	54862000	38986000	48247000	46241000	62573000	0.264961	0.109367	Appl1	sp|Q8K3H0|DP13A_MOUSE DCC-interacting protein 13-alpha OS=Mus musculus OX=10090 GN=Appl1 PE=1 SV=1
27595000	37749000	29914000	31596000	27522000	28803000	36021000	0.080693	0.0352845	Appl2	sp|Q8K3G9|DP13B_MOUSE DCC-interacting protein 13-beta OS=Mus musculus OX=10090 GN=Appl2 PE=1 SV=1
28799000	21936000	29648000	21526000	28709000	31213000	30467000	0.13313	-0.0624036	Aprt	sp|P08030|APT_MOUSE Adenine phosphoribosyltransferase OS=Mus musculus OX=10090 GN=Aprt PE=1 SV=2
6913400	2253900	4953200	2662000	7035000	9091600	8357400	0.449091	-0.527911	Aptx	sp|Q7TQC5|APTX_MOUSE Aprataxin OS=Mus musculus OX=10090 GN=Aptx PE=1 SV=2
33122000	36816000	31772000	29225000	33449000	31247000	41239000	0.0112769	0.00483077	Aqr	sp|Q8CFQ3|AQR_MOUSE RNA helicase aquarius OS=Mus musculus OX=10090 GN=Aqr PE=1 SV=2
3346900	174660	3146700	3921000	3354600	3806000	174660	0.166756	-0.340308	Ar	sp|P19091|ANDR_MOUSE Androgen receptor OS=Mus musculus OX=10090 GN=Ar PE=1 SV=1
6549900	6992700	174660	6591500	5688500	174660	9027800	0.100877	-0.232129	Arap1	sp|Q4LDD4|ARAP1_MOUSE Arf-GAP with Rho-GAP domain, ANK repeat and PH domain-containing protein 1 OS=Mus musculus OX=10090 GN=Arap1 PE=1 SV=2
129390000	125860000	137970000	134070000	129820000	147130000	144860000	0.637758	-0.0843993	Arcn1	sp|Q5XJY5|COPD_MOUSE Coatomer subunit delta OS=Mus musculus OX=10090 GN=Arcn1 PE=1 SV=2
66724000	39301000	38816000	29670000	91844000	38482000	29180000	0.0171261	0.0297785	Arf2	sp|Q8BSL7|ARF2_MOUSE ADP-ribosylation factor 2 OS=Mus musculus OX=10090 GN=Arf2 PE=1 SV=2
386080000	340040000	362440000	282560000	352690000	521370000	425880000	0.209772	-0.124747	Arf3;Arf1	sp|P61205|ARF3_MOUSE ADP-ribosylation factor 3 OS=Mus musculus OX=10090 GN=Arf3 PE=2 SV=2;sp|P84078|ARF1_MOUSE ADP-ribosylation factor 1 OS=Mus musculus OX=10090 GN=Arf1 PE=1 SV=2
170000000	175970000	226700000	172990000	181530000	229150000	289660000	0.328252	-0.193785	Arf4	sp|P61750|ARF4_MOUSE ADP-ribosylation factor 4 OS=Mus musculus OX=10090 GN=Arf4 PE=1 SV=2
124760000	137250000	141640000	129610000	145660000	175120000	168700000	0.73487	-0.202007	Arf5	sp|P84084|ARF5_MOUSE ADP-ribosylation factor 5 OS=Mus musculus OX=10090 GN=Arf5 PE=1 SV=2
31539000	24681000	29470000	19839000	32547000	31790000	17275000	0.25991	0.171453	Arf6	sp|P62331|ARF6_MOUSE ADP-ribosylation factor 6 OS=Mus musculus OX=10090 GN=Arf6 PE=1 SV=2
36388000	50660000	39794000	45898000	41681000	29681000	28266000	0.406408	0.216793	Arfgap1	sp|Q9EPJ9|ARFG1_MOUSE ADP-ribosylation factor GTPase-activating protein 1 OS=Mus musculus OX=10090 GN=Arfgap1 PE=1 SV=2
83117000	89223000	82333000	95874000	90621000	75089000	72166000	0.0727545	0.0249157	Arfgap2	sp|Q99K28|ARFG2_MOUSE ADP-ribosylation factor GTPase-activating protein 2 OS=Mus musculus OX=10090 GN=Arfgap2 PE=1 SV=1
27441000	24194000	20763000	30221000	33871000	36985000	39162000	1.93796	-0.538828	Arfgap3	sp|Q9D8S3|ARFG3_MOUSE ADP-ribosylation factor GTPase-activating protein 3 OS=Mus musculus OX=10090 GN=Arfgap3 PE=1 SV=2
38612000	43069000	51506000	38310000	28260000	35760000	49177000	0.483748	0.229106	Arfgef1	sp|G3X9K3|BIG1_MOUSE Brefeldin A-inhibited guanine nucleotide-exchange protein 1 OS=Mus musculus OX=10090 GN=Arfgef1 PE=1 SV=1
25175000	18215000	17245000	14749000	14782000	23069000	21412000	0.201302	0.127429	Arfgef2	sp|A2A5R2|BIG2_MOUSE Brefeldin A-inhibited guanine nucleotide-exchange protein 2 OS=Mus musculus OX=10090 GN=Arfgef2 PE=1 SV=1
31186000	33609000	38835000	30980000	28069000	28827000	35020000	0.682783	0.169041	Arfip1	tr|G5E8V9|G5E8V9_MOUSE ADP-ribosylation factor-interacting protein 1 OS=Mus musculus OX=10090 GN=Arfip1 PE=1 SV=1
4014100	8145300	4408400	174660	5579300	174660	174660	1.02421	1.85576	Arfip2	sp|Q8K221|ARFP2_MOUSE Arfaptin-2 OS=Mus musculus OX=10090 GN=Arfip2 PE=1 SV=2
100260000	87456000	119450000	86074000	81912000	131940000	146550000	0.170773	-0.124527	Arglu1	sp|Q3UL36|ARGL1_MOUSE Arginine and glutamate-rich protein 1 OS=Mus musculus OX=10090 GN=Arglu1 PE=1 SV=2
91023000	88530000	102880000	81447000	90188000	102330000	71911000	0.389096	0.122691	Arhgap1	sp|Q5FWK3|RHG01_MOUSE Rho GTPase-activating protein 1 OS=Mus musculus OX=10090 GN=Arhgap1 PE=1 SV=1
4652400	7625700	9590000	11097000	2900500	4851400	8527800	0.0631381	0.0909168	Arhgap12	sp|Q8C0D4|RHG12_MOUSE Rho GTPase-activating protein 12 OS=Mus musculus OX=10090 GN=Arhgap12 PE=1 SV=2
19528000	23998000	22983000	17393000	21322000	21412000	24034000	0.227432	0.0754352	Arhgap17	sp|Q3UIA2|RHG17_MOUSE Rho GTPase-activating protein 17 OS=Mus musculus OX=10090 GN=Arhgap17 PE=1 SV=1
17736000	11103000	11139000	14705000	12205000	10351000	9105400	0.308015	0.201164	Arhgap18	sp|Q8K0Q5|RHG18_MOUSE Rho GTPase-activating protein 18 OS=Mus musculus OX=10090 GN=Arhgap18 PE=1 SV=1
4476400	174660	174660	4187400	174660	4767400	6846400	0.529981	-1.31204	Arhgap19	sp|Q8BRH3|RHG19_MOUSE Rho GTPase-activating protein 19 OS=Mus musculus OX=10090 GN=Arhgap19 PE=1 SV=2
3826800	1195600	174660	5456300	5777700	3127100	6126400	1.41627	-1.56394	Arhgap20	sp|Q6IFT4|RHG20_MOUSE Rho GTPase-activating protein 20 OS=Mus musculus OX=10090 GN=Arhgap20 PE=1 SV=1
50752000	38271000	45706000	61773000	41243000	46806000	39199000	0.129321	-0.0734486	Arhgap29	sp|Q8CGF1|RHG29_MOUSE Rho GTPase-activating protein 29 OS=Mus musculus OX=10090 GN=Arhgap29 PE=1 SV=1
4595500	174660	3808400	174660	3495100	4595900	5082100	0.100124	-0.222753	Arhgap32	sp|Q811P8|RHG32_MOUSE Rho GTPase-activating protein 32 OS=Mus musculus OX=10090 GN=Arhgap32 PE=1 SV=2
5046000	174660	5484100	3369800	5942100	5033900	5101000	0.351928	-0.446243	Arhgap35	sp|Q91YM2|RHG35_MOUSE Rho GTPase-activating protein 35 OS=Mus musculus OX=10090 GN=Arhgap35 PE=1 SV=3
12125000	10188000	13465000	10928000	13131000	12535000	11744000	0.0567697	-0.0190475	Arhgap5	sp|P97393|RHG05_MOUSE Rho GTPase-activating protein 5 OS=Mus musculus OX=10090 GN=Arhgap5 PE=1 SV=2
495010000	498050000	502980000	482380000	538620000	450610000	399280000	0.385412	0.0924615	Arhgdia	sp|Q99PT1|GDIR1_MOUSE Rho GDP-dissociation inhibitor 1 OS=Mus musculus OX=10090 GN=Arhgdia PE=1 SV=3
33907000	36504000	18524000	27680000	31799000	31119000	33076000	0.0942775	-0.0606815	Arhgdib	sp|Q61599|GDIR2_MOUSE Rho GDP-dissociation inhibitor 2 OS=Mus musculus OX=10090 GN=Arhgdib PE=1 SV=3
21394000	8726900	10198000	18948000	23242000	22472000	21863000	1.16901	-0.686623	Arhgef1	sp|Q61210|ARHG1_MOUSE Rho guanine nucleotide exchange factor 1 OS=Mus musculus OX=10090 GN=Arhgef1 PE=1 SV=2
6809300	13941000	18000000	6159500	7085600	9982000	17410000	0.276948	0.346448	Arhgef10	sp|Q8C033|ARHGA_MOUSE Rho guanine nucleotide exchange factor 10 OS=Mus musculus OX=10090 GN=Arhgef10 PE=1 SV=2
12745000	13222000	11626000	9323700	14759000	10601000	9545300	0.414707	0.180509	Arhgef11	tr|Q68FM7|Q68FM7_MOUSE Rho guanine nucleotide exchange factor (GEF) 11 OS=Mus musculus OX=10090 GN=Arhgef11 PE=1 SV=1
6177300	10450000	10560000	9825400	6355200	9483900	7549100	0.190529	0.126196	Arhgef12	sp|Q8R4H2|ARHGC_MOUSE Rho guanine nucleotide exchange factor 12 OS=Mus musculus OX=10090 GN=Arhgef12 PE=1 SV=2
6404600	7319700	10372000	3511900	8237800	7878800	5750000	0.456348	0.340242	Arhgef18	sp|Q6P9R4|ARHGI_MOUSE Rho guanine nucleotide exchange factor 18 OS=Mus musculus OX=10090 GN=Arhgef18 PE=1 SV=3
25579000	14966000	16765000	18742000	23250000	22192000	16867000	0.132828	-0.0850056	Arhgef2	sp|Q60875|ARHG2_MOUSE Rho guanine nucleotide exchange factor 2 OS=Mus musculus OX=10090 GN=Arhgef2 PE=1 SV=4
174660	174660	174660	174660	28505000	174660	3051000	0.418325	-5.5131	Arhgef40	sp|Q3UPH7|ARH40_MOUSE Rho guanine nucleotide exchange factor 40 OS=Mus musculus OX=10090 GN=Arhgef40 PE=1 SV=1
7366100	6628800	8019200	4961200	8519300	4871300	174660	0.611743	0.663878	Arhgef6	sp|Q8K4I3|ARHG6_MOUSE Rho guanine nucleotide exchange factor 6 OS=Mus musculus OX=10090 GN=Arhgef6 PE=1 SV=1
30858000	29581000	29819000	33534000	27240000	34131000	27242000	0.0700436	-0.0214542	Arhgef7	sp|Q9ES28|ARHG7_MOUSE Rho guanine nucleotide exchange factor 7 OS=Mus musculus OX=10090 GN=Arhgef7 PE=1 SV=2
13013000	12677000	11401000	10466000	9455900	9138300	8100400	2.12982	0.412333	Arid1a	sp|A2BH40|ARI1A_MOUSE AT-rich interactive domain-containing protein 1A OS=Mus musculus OX=10090 GN=Arid1a PE=1 SV=1
174660	4002200	38612000	174660	49405000	51028000	66420000	0.648388	-1.54974	Arid1b	sp|E9Q4N7|ARI1B_MOUSE AT-rich interactive domain-containing protein 1B OS=Mus musculus OX=10090 GN=Arid1b PE=1 SV=1
27044000	23163000	21497000	29047000	27567000	32710000	32493000	1.62377	-0.349552	Arid2	sp|E9Q7E2|ARID2_MOUSE AT-rich interactive domain-containing protein 2 OS=Mus musculus OX=10090 GN=Arid2 PE=1 SV=1
64268000	174660	32168000	35976000	174660	174660	174660	0.563444	1.81932	Arid3b	sp|Q9Z1N7|ARI3B_MOUSE AT-rich interactive domain-containing protein 3B OS=Mus musculus OX=10090 GN=Arid3b PE=1 SV=1
3234300	5075400	8929600	11313000	4853800	3153400	174660	0.101906	0.237645	Arid4a	sp|F8VPQ2|ARI4A_MOUSE AT-rich interactive domain-containing protein 4A OS=Mus musculus OX=10090 GN=Arid4a PE=1 SV=1
55429000	91623000	56769000	15615000	20494000	30557000	38892000	1.79074	1.3643	Arid4b	sp|A2CG63|ARI4B_MOUSE AT-rich interactive domain-containing protein 4B OS=Mus musculus OX=10090 GN=Arid4b PE=1 SV=1
26726000	24625000	30517000	21259000	29206000	38454000	44274000	0.425947	-0.287109	Arih1	sp|Q9Z1K5|ARI1_MOUSE E3 ubiquitin-protein ligase ARIH1 OS=Mus musculus OX=10090 GN=Arih1 PE=1 SV=3
17696000	16167000	18633000	18222000	23440000	25788000	26982000	1.30302	-0.432031	Arih2	sp|Q9Z1K6|ARI2_MOUSE E3 ubiquitin-protein ligase ARIH2 OS=Mus musculus OX=10090 GN=Arih2 PE=1 SV=1
76268000	47034000	38699000	19921000	35400000	39545000	68720000	0.363702	0.400991	Arl1	sp|P61211|ARL1_MOUSE ADP-ribosylation factor-like protein 1 OS=Mus musculus OX=10090 GN=Arl1 PE=1 SV=1
3657300	8006000	4984200	3611900	7409000	3034600	2015200	0.372412	0.46591	Arl14ep	sp|Q8BIX3|AL14E_MOUSE ARL14 effector protein OS=Mus musculus OX=10090 GN=Arl14ep PE=1 SV=1
5914300	174660	4231600	174660	3019400	5998900	174660	0.196942	0.554804	Arl14epl	sp|Q3UKZ7|A14EL_MOUSE ARL14 effector protein-like OS=Mus musculus OX=10090 GN=Arl14epl PE=2 SV=1
2511800	4354600	5310900	4644200	174660	3484100	174660	0.587606	0.937501	Arl15	sp|Q8BGR6|ARL15_MOUSE ADP-ribosylation factor-like protein 15 OS=Mus musculus OX=10090 GN=Arl15 PE=1 SV=1
5690900	3986100	1521800	3505600	6560000	14536000	7224000	0.675543	-1.09181	Arl2	sp|Q9D0J4|ARL2_MOUSE ADP-ribosylation factor-like protein 2 OS=Mus musculus OX=10090 GN=Arl2 PE=1 SV=1
20745000	10047000	28860000	26084000	44350000	26009000	32430000	0.881459	-0.69627	Arl2bp	sp|Q9D385|AR2BP_MOUSE ADP-ribosylation factor-like protein 2-binding protein OS=Mus musculus OX=10090 GN=Arl2bp PE=1 SV=1
96458000	67827000	68480000	134560000	156370000	148210000	184880000	2.48967	-1.00768	Arl3	sp|Q9WUL7|ARL3_MOUSE ADP-ribosylation factor-like protein 3 OS=Mus musculus OX=10090 GN=Arl3 PE=1 SV=1
25037000	15588000	16675000	24221000	42612000	41109000	41027000	1.60425	-0.963368	Arl6	sp|O88848|ARL6_MOUSE ADP-ribosylation factor-like protein 6 OS=Mus musculus OX=10090 GN=Arl6 PE=1 SV=1
69220000	64251000	59311000	40508000	117660000	71124000	87460000	0.326073	-0.301346	Arl6ip1	sp|Q9JKW0|AR6P1_MOUSE ADP-ribosylation factor-like protein 6-interacting protein 1 OS=Mus musculus OX=10090 GN=Arl6ip1 PE=1 SV=1
5976200	7454800	9707800	5067800	12181000	10779000	5857100	0.123225	-0.135291	Arl6ip4	sp|Q9JM93|AR6P4_MOUSE ADP-ribosylation factor-like protein 6-interacting protein 4 OS=Mus musculus OX=10090 GN=Arl6ip4 PE=1 SV=1
17238000	20997000	12673000	15612000	12735000	17589000	19479000	0.0836507	0.0533084	Arl6ip5	sp|Q8R5J9|PRAF3_MOUSE PRA1 family protein 3 OS=Mus musculus OX=10090 GN=Arl6ip5 PE=1 SV=2
8935900	9941800	10820000	13120000	7449000	8863300	17499000	0.2753	-0.245162	Arl6ip6	sp|Q8BH07|AR6P6_MOUSE ADP-ribosylation factor-like protein 6-interacting protein 6 OS=Mus musculus OX=10090 GN=Arl6ip6 PE=1 SV=1
20115000	22918000	16170000	21211000	174660	14984000	16652000	0.519937	0.574126	Arl8a	sp|Q8VEH3|ARL8A_MOUSE ADP-ribosylation factor-like protein 8A OS=Mus musculus OX=10090 GN=Arl8a PE=1 SV=1
276190000	142630000	112710000	133160000	123390000	233080000	138620000	0.146519	0.17385	Arl8b	sp|Q9CQW2|ARL8B_MOUSE ADP-ribosylation factor-like protein 8B OS=Mus musculus OX=10090 GN=Arl8b PE=1 SV=1
17788000	19428000	16722000	17258000	14303000	13885000	25962000	0.0125827	0.0102538	Armc1	sp|Q9D7A8|ARMC1_MOUSE Armadillo repeat-containing protein 1 OS=Mus musculus OX=10090 GN=Armc1 PE=1 SV=1
55567000	46044000	80711000	48896000	38494000	45544000	35582000	0.984162	0.528641	Armc10	sp|Q9D0L7|ARM10_MOUSE Armadillo repeat-containing protein 10 OS=Mus musculus OX=10090 GN=Armc10 PE=1 SV=1
1561100	10522000	14931000	11562000	8824200	8213500	16090000	0.219171	-0.311192	Armc3	sp|A2AU72|ARMC3_MOUSE Armadillo repeat-containing protein 3 OS=Mus musculus OX=10090 GN=Armc3 PE=1 SV=1
12158000	11328000	6869000	15658000	16755000	16376000	29095000	1.16267	-0.944355	Armc4	sp|B2RY50|ODAD2_MOUSE Outer dynein arm-docking complex subunit 2 OS=Mus musculus OX=10090 GN=Odad2 PE=1 SV=1
12858000	12561000	13849000	15629000	14013000	13360000	14592000	0.98929	-0.137527	Armc6	sp|Q8BNU0|ARMC6_MOUSE Armadillo repeat-containing protein 6 OS=Mus musculus OX=10090 GN=Armc6 PE=1 SV=1
38189000	28245000	30057000	35758000	27621000	39977000	45672000	0.431713	-0.21208	Armc8	sp|Q9DBR3|ARMC8_MOUSE Armadillo repeat-containing protein 8 OS=Mus musculus OX=10090 GN=Armc8 PE=1 SV=2
5455000	2365100	2512600	5889300	6038300	6180400	174660	0.233179	-0.408221	Armc9	sp|Q9D2I5|ARMC9_MOUSE LisH domain-containing protein ARMC9 OS=Mus musculus OX=10090 GN=Armc9 PE=1 SV=1
3779700	5986000	174660	4431400	4009100	174660	174660	0.223529	0.592502	Armcx2	sp|Q6A058|ARMX2_MOUSE Armadillo repeat-containing X-linked protein 2 OS=Mus musculus OX=10090 GN=Armcx2 PE=2 SV=2
120350000	68376000	92538000	146280000	152890000	177770000	152020000	2.07912	-0.746006	Armt1	sp|A6H630|ARMT1_MOUSE Damage-control phosphatase ARMT1 OS=Mus musculus OX=10090 GN=Armt1 PE=1 SV=1
18040000	18582000	18319000	17161000	16548000	19427000	18861000	0.144759	0.0249839	Arpc1a	sp|Q9R0Q6|ARC1A_MOUSE Actin-related protein 2/3 complex subunit 1A OS=Mus musculus OX=10090 GN=Arpc1a PE=1 SV=1
85923000	99439000	97313000	104660000	108730000	81851000	95476000	0.167925	-0.0519422	Arpc1b	sp|Q9WV32|ARC1B_MOUSE Actin-related protein 2/3 complex subunit 1B OS=Mus musculus OX=10090 GN=Arpc1b PE=1 SV=4
71146000	71734000	65465000	60405000	60699000	79241000	72604000	0.0751043	0.0253806	Arpc2	sp|Q9CVB6|ARPC2_MOUSE Actin-related protein 2/3 complex subunit 2 OS=Mus musculus OX=10090 GN=Arpc2 PE=1 SV=3
49603000	54799000	46037000	54207000	58006000	53541000	57915000	1.13607	-0.157149	Arpc3	sp|Q9JM76|ARPC3_MOUSE Actin-related protein 2/3 complex subunit 3 OS=Mus musculus OX=10090 GN=Arpc3 PE=1 SV=3
102180000	88398000	78705000	82623000	95931000	101140000	121650000	0.41271	-0.160679	Arpc4	sp|P59999|ARPC4_MOUSE Actin-related protein 2/3 complex subunit 4 OS=Mus musculus OX=10090 GN=Arpc4 PE=1 SV=3
88411000	130550000	95905000	97612000	94714000	103250000	57740000	0.448186	0.248816	Arpc5	sp|Q9CPW4|ARPC5_MOUSE Actin-related protein 2/3 complex subunit 5 OS=Mus musculus OX=10090 GN=Arpc5 PE=1 SV=3
56397000	50949000	51448000	42312000	39174000	62813000	54120000	0.196294	0.0936437	Arpc5l	sp|Q9D898|ARP5L_MOUSE Actin-related protein 2/3 complex subunit 5-like protein OS=Mus musculus OX=10090 GN=Arpc5l PE=1 SV=1
10304000	12266000	10066000	11434000	10175000	11209000	6002300	0.303097	0.16469	Arpin	sp|Q9D0A3|ARPIN_MOUSE Arpin OS=Mus musculus OX=10090 GN=Arpin PE=1 SV=1
43663000	54956000	44057000	42443000	44536000	46506000	44197000	0.421974	0.0984826	Arpp19	sp|P56212|ARP19_MOUSE cAMP-regulated phosphoprotein 19 OS=Mus musculus OX=10090 GN=Arpp19 PE=1 SV=2
2210800	174660	174660	3398100	3897700	174660	3467500	0.775965	-1.68002	Arsa	sp|P50428|ARSA_MOUSE Arylsulfatase A OS=Mus musculus OX=10090 GN=Arsa PE=1 SV=2
9666400	11433000	9584800	8765300	8255000	14248000	7366800	0.109228	0.0826213	Arsb	sp|P50429|ARSB_MOUSE Arylsulfatase B OS=Mus musculus OX=10090 GN=Arsb PE=1 SV=3
61545000	28971000	46200000	71193000	90713000	124740000	160010000	1.37141	-1.29294	Art3	sp|Q8R2G4|NAR3_MOUSE Ecto-ADP-ribosyltransferase 3 OS=Mus musculus OX=10090 GN=Art3 PE=1 SV=2
14513000	16588000	14648000	14844000	10714000	14270000	16766000	0.283157	0.108129	ARXS2	sp|C0HK80|ARXS2_MOUSE Adipocyte-related X-chromosome expressed sequence 2 OS=Mus musculus OX=10090 GN=Arxes2 PE=1 SV=1;sp|C0HK79|ARXS1_MOUSE Adipocyte-related X-chromosome expressed sequence 1 OS=Mus musculus OX=10090 GN=Arxes1 PE=1 SV=1
71100000	47992000	73068000	48539000	73933000	87317000	107690000	0.413029	-0.309316	As3mt	sp|Q91WU5|AS3MT_MOUSE Arsenite methyltransferase OS=Mus musculus OX=10090 GN=As3mt PE=1 SV=2
23915000	29479000	26013000	18888000	23520000	20622000	24399000	1.14037	0.276192	Asah1	sp|Q9WV54|ASAH1_MOUSE Acid ceramidase OS=Mus musculus OX=10090 GN=Asah1 PE=1 SV=1
4968100	7430000	4453400	4962800	5037800	5513600	3093300	0.424395	0.27203	Asap1	sp|Q9QWY8|ASAP1_MOUSE Arf-GAP with SH3 domain, ANK repeat and PH domain-containing protein 1 OS=Mus musculus OX=10090 GN=Asap1 PE=1 SV=2
174660	174660	174660	174660	2745500	3706400	7813500	0.896627	-4.36938	Asb3	sp|Q9WV72|ASB3_MOUSE Ankyrin repeat and SOCS box protein 3 OS=Mus musculus OX=10090 GN=Asb3 PE=1 SV=2
4768300	4293200	5320600	3552000	6222900	4812200	2172600	0.228108	0.194316	Asb9	sp|Q91ZT8|ASB9_MOUSE Ankyrin repeat and SOCS box protein 9 OS=Mus musculus OX=10090 GN=Asb9 PE=1 SV=2
8591700	174660	15759000	9285600	12025000	18548000	12510000	0.499603	-0.67939	Ascc1	sp|Q9D8Z1|ASCC1_MOUSE Activating signal cointegrator 1 complex subunit 1 OS=Mus musculus OX=10090 GN=Ascc1 PE=1 SV=1
4332000	6459800	6128900	6475300	5259300	6230300	10193000	0.440981	-0.319713	Ascc2	sp|Q91WR3|ASCC2_MOUSE Activating signal cointegrator 1 complex subunit 2 OS=Mus musculus OX=10090 GN=Ascc2 PE=1 SV=1
7923500	6846300	6514100	8138300	7458000	11722000	11366000	0.947979	-0.446948	Ascc3	sp|E9PZJ8|ASCC3_MOUSE Activating signal cointegrator 1 complex subunit 3 OS=Mus musculus OX=10090 GN=Ascc3 PE=1 SV=1
17289000	9369100	20404000	14680000	16529000	11765000	16916000	0.0832015	0.0672881	Asf1a	sp|Q9CQE6|ASF1A_MOUSE Histone chaperone ASF1A OS=Mus musculus OX=10090 GN=Asf1a PE=1 SV=1
56617000	60735000	45604000	37285000	53285000	49456000	51450000	0.509142	0.182356	Asf1b	sp|Q9DAP7|ASF1B_MOUSE Histone chaperone ASF1B OS=Mus musculus OX=10090 GN=Asf1b PE=1 SV=1
16122000	19332000	18444000	13530000	17204000	12273000	14338000	1.24363	0.325602	Ash2l	sp|Q91X20|ASH2L_MOUSE Set1/Ash2 histone methyltransferase complex subunit ASH2 OS=Mus musculus OX=10090 GN=Ash2l PE=1 SV=1
40489000	49387000	47950000	38222000	43162000	50660000	46383000	0.128409	0.0425516	Asl	sp|Q91YI0|ARLY_MOUSE Argininosuccinate lyase OS=Mus musculus OX=10090 GN=Asl PE=1 SV=1
69225000	58691000	70356000	52300000	75559000	70687000	58598000	0.0924042	0.039942	Asna1	sp|O54984|GET3_MOUSE ATPase GET3 OS=Mus musculus OX=10090 GN=Get3 PE=1 SV=2
43896000	39453000	46582000	46183000	57813000	42049000	46276000	0.487998	-0.150733	Asns	sp|Q61024|ASNS_MOUSE Asparagine synthetase [glutamine-hydrolyzing] OS=Mus musculus OX=10090 GN=Asns PE=1 SV=3
13349000	13750000	12617000	12450000	10050000	13675000	18771000	0.0811978	-0.0532566	Asph	sp|Q8BSY0|ASPH_MOUSE Aspartyl/asparaginyl beta-hydroxylase OS=Mus musculus OX=10090 GN=Asph PE=1 SV=1
5366200	174660	8711300	7878300	6681700	6018100	174660	0.0524904	-0.127085	Aspm	sp|Q8CJ27|ASPM_MOUSE Abnormal spindle-like microcephaly-associated protein homolog OS=Mus musculus OX=10090 GN=Aspm PE=1 SV=2
5570600	9451900	174660	2983200	3385100	174660	7253300	0.226929	0.554562	Aspn	sp|Q99MQ4|ASPN_MOUSE Asporin OS=Mus musculus OX=10090 GN=Aspn PE=1 SV=1
32419000	27800000	31871000	46612000	53252000	36726000	52461000	1.78364	-0.622622	Aspscr1	sp|Q8VBT9|ASPC1_MOUSE Tether containing UBX domain for GLUT4 OS=Mus musculus OX=10090 GN=Aspscr1 PE=1 SV=1
97405000	58254000	84327000	119170000	144150000	152610000	194450000	1.75207	-0.93172	Asrgl1	sp|Q8C0M9|ASGL1_MOUSE Isoaspartyl peptidase/L-asparaginase OS=Mus musculus OX=10090 GN=Asrgl1 PE=1 SV=1
342800000	350930000	425920000	1047600000	1000200000	1133900000	1054900000	4.93223	-1.50482	Ass1	sp|P16460|ASSY_MOUSE Argininosuccinate synthase OS=Mus musculus OX=10090 GN=Ass1 PE=1 SV=1
34256000	20975000	34118000	32377000	37881000	39262000	39633000	0.876102	-0.324232	Asun	sp|Q8QZV7|INT13_MOUSE Integrator complex subunit 13 OS=Mus musculus OX=10090 GN=IntS13 PE=1 SV=2
63199000	48226000	71692000	52501000	58992000	69577000	60868000	0.0265434	0.0131658	Asz1	sp|Q8VD46|ASZ1_MOUSE Ankyrin repeat, SAM and basic leucine zipper domain-containing protein 1 OS=Mus musculus OX=10090 GN=Asz1 PE=1 SV=2
33303000	27699000	28462000	31868000	38662000	41654000	50435000	1.13663	-0.447079	Atad1	sp|Q9D5T0|ATAD1_MOUSE Outer mitochondrial transmembrane helix translocase OS=Mus musculus OX=10090 GN=Atad1 PE=1 SV=1
5581100	5911100	7406300	5617000	5292200	5625300	9143700	0.034952	-0.0272348	Atad2	sp|Q8CDM1|ATAD2_MOUSE ATPase family AAA domain-containing protein 2 OS=Mus musculus OX=10090 GN=Atad2 PE=1 SV=1
49667000	49295000	51230000	53048000	49039000	47095000	43263000	0.334105	0.0573993	Atad3	sp|Q925I1|ATAD3_MOUSE ATPase family AAA domain-containing protein 3 OS=Mus musculus OX=10090 GN=Atad3 PE=1 SV=1
201890000	154330000	116630000	183120000	151480000	188160000	123050000	0.0487081	-0.0346897	Ate1	sp|Q9Z2A5|ATE1_MOUSE Arginyl-tRNA--protein transferase 1 OS=Mus musculus OX=10090 GN=Ate1 PE=1 SV=2
8107900	8031500	174660	6435600	9114600	3842900	1619500	0.0213798	0.0498987	Atf2	sp|P16951|ATF2_MOUSE Cyclic AMP-dependent transcription factor ATF-2 OS=Mus musculus OX=10090 GN=Atf2 PE=1 SV=2
16694000	20243000	24239000	14632000	16023000	12286000	6331500	1.31025	0.727221	Atf7	sp|Q8R0S1|ATF7_MOUSE Cyclic AMP-dependent transcription factor ATF-7 OS=Mus musculus OX=10090 GN=Atf7 PE=1 SV=1
9442800	11254000	12637000	12659000	9961500	7618700	8386600	0.41489	0.202458	Atf7ip	sp|Q7TT18|MCAF1_MOUSE Activating transcription factor 7-interacting protein 1 OS=Mus musculus OX=10090 GN=Atf7ip PE=1 SV=1
23409000	14585000	17504000	10525000	13335000	18081000	10762000	0.864603	0.489588	Atf7ip2	sp|Q3UL97|MCAF2_MOUSE Activating transcription factor 7-interacting protein 2 OS=Mus musculus OX=10090 GN=Atf7ip2 PE=2 SV=1
3765000	11630000	4605000	174660	174660	7770700	11136000	0.184964	0.469728	Atg13	sp|Q91YI1|ATG13_MOUSE Autophagy-related protein 13 OS=Mus musculus OX=10090 GN=Atg13 PE=1 SV=2
17212000	13498000	14467000	14571000	11595000	10315000	9183400	1.09922	0.399556	Atg16l1	sp|Q8C0J2|A16L1_MOUSE Autophagy-related protein 16-1 OS=Mus musculus OX=10090 GN=Atg16l1 PE=1 SV=1
2540200	2653600	2384900	2300300	174660	3024800	8350200	0.175144	-0.454822	Atg2a	sp|Q6P4T0|ATG2A_MOUSE Autophagy-related protein 2 homolog A OS=Mus musculus OX=10090 GN=Atg2a PE=1 SV=2
13166000	18594000	16156000	12704000	5930400	12354000	21124000	0.31357	0.293918	Atg2b	sp|Q80XK6|ATG2B_MOUSE Autophagy-related protein 2 homolog B OS=Mus musculus OX=10090 GN=Atg2b PE=1 SV=3
45372000	46356000	71368000	65070000	71810000	48777000	41203000	0.0761552	-0.0610434	Atg3	sp|Q9CPX6|ATG3_MOUSE Ubiquitin-like-conjugating enzyme ATG3 OS=Mus musculus OX=10090 GN=Atg3 PE=1 SV=1
16099000	14341000	19742000	12085000	18002000	34174000	25517000	0.431528	-0.424154	Atg4b	sp|Q8BGE6|ATG4B_MOUSE Cysteine protease ATG4B OS=Mus musculus OX=10090 GN=Atg4b PE=1 SV=2
11897000	13683000	12625000	9951700	8545500	2016700	10009000	1.11684	0.738907	Atg5	sp|Q99J83|ATG5_MOUSE Autophagy protein 5 OS=Mus musculus OX=10090 GN=Atg5 PE=1 SV=1
19846000	18601000	19157000	19766000	17746000	17857000	21710000	0.0200937	-0.00513136	Atg7	sp|Q9D906|ATG7_MOUSE Ubiquitin-like modifier-activating enzyme ATG7 OS=Mus musculus OX=10090 GN=Atg7 PE=1 SV=1
162310000	143590000	189400000	139980000	139520000	158670000	150540000	0.682945	0.165783	Atic	sp|Q9CWJ9|PUR9_MOUSE Bifunctional purine biosynthesis protein ATIC OS=Mus musculus OX=10090 GN=Atic PE=1 SV=2
3482900	2887600	1362400	9240900	6406200	10830000	10929000	2.38544	-1.85915	Atl1	sp|Q8BH66|ATLA1_MOUSE Atlastin-1 OS=Mus musculus OX=10090 GN=Atl1 PE=1 SV=1
23950000	18724000	23332000	25773000	19640000	25770000	35775000	0.509862	-0.281338	Atl2	sp|Q6PA06|ATLA2_MOUSE Atlastin-2 OS=Mus musculus OX=10090 GN=Atl2 PE=1 SV=1
55793000	55925000	68740000	51007000	56545000	59989000	74213000	0.0139326	-0.00683916	Atl3	sp|Q91YH5|ATLA3_MOUSE Atlastin-3 OS=Mus musculus OX=10090 GN=Atl3 PE=1 SV=1
5484500	5347600	5215000	3437800	4309200	5293700	3977900	1.18205	0.330238	Atm	sp|Q62388|ATM_MOUSE Serine-protein kinase ATM OS=Mus musculus OX=10090 GN=Atm PE=1 SV=2
5507600	13525000	8230900	3671400	8129400	4559600	174660	0.877541	1.13648	Atn1	sp|O35126|ATN1_MOUSE Atrophin-1 OS=Mus musculus OX=10090 GN=Atn1 PE=1 SV=1
159720000	142250000	140600000	112230000	162940000	96887000	321540000	0.1618	-0.233154	Atox1	sp|O08997|ATOX1_MOUSE Copper transport protein ATOX1 OS=Mus musculus OX=10090 GN=Atox1 PE=1 SV=1
3633400	174660	3846300	3790600	174660	6216200	8386700	0.390758	-0.86344	Atp11a	sp|P98197|AT11A_MOUSE Phospholipid-transporting ATPase IH OS=Mus musculus OX=10090 GN=Atp11a PE=1 SV=1
21070000	174660	174660	8705100	6627200	5223200	5681500	0.0336582	0.122347	Atp11b	sp|Q6DFW5|AT11B_MOUSE Phospholipid-transporting ATPase IF OS=Mus musculus OX=10090 GN=Atp11b PE=1 SV=1
3795300	174660	4617500	174660	2770800	4049900	4270500	0.00962108	0.0233834	Atp11c	sp|Q9QZW0|AT11C_MOUSE Phospholipid-transporting ATPase 11C OS=Mus musculus OX=10090 GN=Atp11c PE=1 SV=2
81571000	162610000	140300000	88813000	123940000	74941000	106230000	0.572116	0.380032	Atp12a	sp|Q9Z1W8|AT12A_MOUSE Potassium-transporting ATPase alpha chain 2 OS=Mus musculus OX=10090 GN=Atp12a PE=1 SV=3
32630000	33005000	33094000	32190000	30011000	36871000	38842000	0.263646	-0.0671856	Atp13a1	sp|Q9EPE9|AT131_MOUSE Endoplasmic reticulum transmembrane helix translocase OS=Mus musculus OX=10090 GN=Atp13a1 PE=1 SV=2
303730000	386250000	368520000	276520000	288200000	317390000	339140000	0.862844	0.2087	Atp1a1	sp|Q8VDN2|AT1A1_MOUSE Sodium/potassium-transporting ATPase subunit alpha-1 OS=Mus musculus OX=10090 GN=Atp1a1 PE=1 SV=1
23386000	25820000	15685000	29717000	33880000	25111000	28492000	1.15618	-0.437845	Atp1a2	sp|Q6PIE5|AT1A2_MOUSE Sodium/potassium-transporting ATPase subunit alpha-2 OS=Mus musculus OX=10090 GN=Atp1a2 PE=1 SV=1
41844000	69914000	59677000	76574000	62159000	65996000	56889000	0.428138	-0.194763	Atp1a3	sp|Q6PIC6|AT1A3_MOUSE Sodium/potassium-transporting ATPase subunit alpha-3 OS=Mus musculus OX=10090 GN=Atp1a3 PE=1 SV=1
7197900	9474500	7360400	10452000	11851000	12260000	8233500	1.08652	-0.417451	Atp1a4	sp|Q9WV27|AT1A4_MOUSE Sodium/potassium-transporting ATPase subunit alpha-4 OS=Mus musculus OX=10090 GN=Atp1a4 PE=1 SV=3
109910000	114040000	101610000	87818000	85487000	86710000	87427000	3.02285	0.321189	Atp1b1	sp|P14094|AT1B1_MOUSE Sodium/potassium-transporting ATPase subunit beta-1 OS=Mus musculus OX=10090 GN=Atp1b1 PE=1 SV=1
2490400	174660	6174700	174660	6982600	174660	174660	0.164239	0.650889	Atp1b2	sp|P14231|AT1B2_MOUSE Sodium/potassium-transporting ATPase subunit beta-2 OS=Mus musculus OX=10090 GN=Atp1b2 PE=1 SV=2
13048000	12715000	13253000	17365000	13630000	23470000	12186000	0.561284	-0.357523	Atp1b3	sp|P97370|AT1B3_MOUSE Sodium/potassium-transporting ATPase subunit beta-3 OS=Mus musculus OX=10090 GN=Atp1b3 PE=1 SV=1
174660	174660	174660	174660	174660	174660	174660	#DIV/0!	0	Atp2a1	sp|Q8R429|AT2A1_MOUSE Sarcoplasmic/endoplasmic reticulum calcium ATPase 1 OS=Mus musculus OX=10090 GN=Atp2a1 PE=1 SV=1
228710000	216830000	208300000	239650000	215250000	212960000	230210000	0.303536	-0.0428528	Atp2a2	sp|O55143|AT2A2_MOUSE Sarcoplasmic/endoplasmic reticulum calcium ATPase 2 OS=Mus musculus OX=10090 GN=Atp2a2 PE=1 SV=2
65454000	67958000	93043000	87460000	60330000	63536000	49840000	0.364009	0.209295	Atp2b1	sp|G5E829|AT2B1_MOUSE Plasma membrane calcium-transporting ATPase 1 OS=Mus musculus OX=10090 GN=Atp2b1 PE=1 SV=1
174660	174660	1967200	1427100	174660	4297700	5491700	0.626597	-1.88285	Atp2b3	tr|Q0VF55|Q0VF55_MOUSE Calcium-transporting ATPase OS=Mus musculus OX=10090 GN=Atp2b3 PE=1 SV=1
77340000	78932000	78693000	97502000	102410000	79149000	104650000	1.29852	-0.292537	Atp2b4	sp|Q6Q477|AT2B4_MOUSE Plasma membrane calcium-transporting ATPase 4 OS=Mus musculus OX=10090 GN=Atp2b4 PE=1 SV=1
892100000	1000800000	944450000	1060500000	911850000	872800000	789390000	0.20198	0.0578088	Atp5a1	sp|Q03265|ATPA_MOUSE ATP synthase subunit alpha, mitochondrial OS=Mus musculus OX=10090 GN=Atp5f1a PE=1 SV=1
1506600000	1756200000	1719100000	1574200000	1588800000	1470400000	1645800000	0.526617	0.0811528	Atp5b	sp|P56480|ATPB_MOUSE ATP synthase subunit beta, mitochondrial OS=Mus musculus OX=10090 GN=Atp5f1b PE=1 SV=2
149520000	128730000	125120000	117840000	154120000	132120000	124650000	0.0715201	0.0246101	Atp5c1	sp|Q91VR2|ATPG_MOUSE ATP synthase subunit gamma, mitochondrial OS=Mus musculus OX=10090 GN=Atp5f1c PE=1 SV=1
28531000	72472000	70044000	94780000	143390000	39000000	31421000	0.243308	-0.436266	Atp5d	sp|Q9D3D9|ATPD_MOUSE ATP synthase subunit delta, mitochondrial OS=Mus musculus OX=10090 GN=Atp5f1d PE=1 SV=1
78335000	72858000	81463000	66212000	19618000	123510000	106990000	0.0187228	-0.0281945	Atp5e	sp|P56382|ATP5E_MOUSE ATP synthase subunit epsilon, mitochondrial OS=Mus musculus OX=10090 GN=Atp5f1e PE=1 SV=2
174410000	172710000	189090000	178280000	164370000	188440000	118750000	0.37243	0.137751	Atp5f1	sp|Q9CQQ7|AT5F1_MOUSE ATP synthase F(0) complex subunit B1, mitochondrial OS=Mus musculus OX=10090 GN=Atp5pb PE=1 SV=1
195120000	192260000	199180000	202230000	233520000	200260000	240200000	0.935252	-0.16396	Atp5h	sp|Q9DCX2|ATP5H_MOUSE ATP synthase subunit d, mitochondrial OS=Mus musculus OX=10090 GN=Atp5pd PE=1 SV=3
266430000	222630000	206760000	211640000	244360000	220780000	181810000	0.341637	0.111782	Atp5i	sp|Q06185|ATP5I_MOUSE ATP synthase subunit e, mitochondrial OS=Mus musculus OX=10090 GN=Atp5me PE=1 SV=2
313480000	353860000	357440000	273570000	282550000	358410000	292160000	0.742529	0.179297	Atp5j	sp|P97450|ATP5J_MOUSE ATP synthase-coupling factor 6, mitochondrial OS=Mus musculus OX=10090 GN=Atp5pf PE=1 SV=1
176640000	219870000	188190000	201480000	157370000	198930000	237710000	0.0628593	-0.0291097	Atp5j2	sp|P56135|ATPK_MOUSE ATP synthase subunit f, mitochondrial OS=Mus musculus OX=10090 GN=Atp5mf PE=1 SV=3
174530000	174420000	170460000	170470000	175260000	181160000	157900000	0.120418	0.0162497	Atp5l	sp|Q9CPQ8|ATP5L_MOUSE ATP synthase subunit g, mitochondrial OS=Mus musculus OX=10090 GN=Atp5mg PE=1 SV=1
194440000	166410000	203290000	186030000	253570000	195040000	212110000	0.536858	-0.170845	Atp5o	sp|Q9DB20|ATPO_MOUSE ATP synthase subunit O, mitochondrial OS=Mus musculus OX=10090 GN=Atp5po PE=1 SV=1
8198000	9128400	8268500	4849800	9371500	8366600	10515000	0.0612111	0.0439363	Atp5s	sp|Q9CRA7|ATP5S_MOUSE ATP synthase subunit s, mitochondrial OS=Mus musculus OX=10090 GN=Dmac2l PE=1 SV=1
21033000	17850000	9150400	10944000	12225000	12401000	14937000	0.482607	0.342592	Atp6ap1	sp|Q9R1Q9|VAS1_MOUSE V-type proton ATPase subunit S1 OS=Mus musculus OX=10090 GN=Atp6ap1 PE=1 SV=1
8584400	10702000	9614800	10045000	9783100	10137000	15613000	0.445232	-0.242174	Atp6ap2	sp|Q9CYN9|RENR_MOUSE Renin receptor OS=Mus musculus OX=10090 GN=Atp6ap2 PE=1 SV=2
26269000	24988000	25315000	30126000	30385000	29359000	30338000	3.88854	-0.235607	Atp6v0a1	sp|Q9Z1G4|VPP1_MOUSE V-type proton ATPase 116 kDa subunit a1 OS=Mus musculus OX=10090 GN=Atp6v0a1 PE=1 SV=3
22758000	23863000	23590000	20041000	15092000	10311000	20466000	1.2303	0.506237	Atp6v0c	sp|P63082|VATL_MOUSE V-type proton ATPase 16 kDa proteolipid subunit OS=Mus musculus OX=10090 GN=Atp6v0c PE=1 SV=1
24221000	29234000	30873000	29992000	31527000	34686000	30712000	0.849825	-0.174764	Atp6v0d1	sp|P51863|VA0D1_MOUSE V-type proton ATPase subunit d 1 OS=Mus musculus OX=10090 GN=Atp6v0d1 PE=1 SV=2
127490000	122180000	133930000	115070000	168480000	140550000	146270000	0.497061	-0.157258	Atp6v1a	sp|P50516|VATA_MOUSE V-type proton ATPase catalytic subunit A OS=Mus musculus OX=10090 GN=Atp6v1a PE=1 SV=2
72145000	77190000	70833000	73149000	91364000	102350000	105620000	1.12295	-0.343532	Atp6v1b2	sp|P62814|VATB2_MOUSE V-type proton ATPase subunit B, brain isoform OS=Mus musculus OX=10090 GN=Atp6v1b2 PE=1 SV=1
46770000	46639000	34496000	38498000	44872000	40556000	32744000	0.320433	0.122381	Atp6v1c1	sp|Q9Z1G3|VATC1_MOUSE V-type proton ATPase subunit C 1 OS=Mus musculus OX=10090 GN=Atp6v1c1 PE=1 SV=4
25510000	26607000	36043000	26394000	33394000	36324000	48841000	0.49435	-0.302352	Atp6v1d	sp|P57746|VATD_MOUSE V-type proton ATPase subunit D OS=Mus musculus OX=10090 GN=Atp6v1d PE=1 SV=1
73795000	61847000	68968000	79445000	77021000	60790000	82153000	0.46191	-0.134203	Atp6v1e1	sp|P50518|VATE1_MOUSE V-type proton ATPase subunit E 1 OS=Mus musculus OX=10090 GN=Atp6v1e1 PE=1 SV=2
174660	174660	174660	1311800	1521300	4263800	5724100	1.20008	-4.19782	Atp6v1e2	sp|Q9D593|VATE2_MOUSE V-type proton ATPase subunit E 2 OS=Mus musculus OX=10090 GN=Atp6v1e2 PE=1 SV=1
98120000	76635000	98978000	79647000	87651000	105180000	112550000	0.177517	-0.0771565	Atp6v1f	sp|Q9D1K2|VATF_MOUSE V-type proton ATPase subunit F OS=Mus musculus OX=10090 GN=Atp6v1f PE=1 SV=2
126310000	128030000	161340000	157310000	152940000	92780000	144260000	0.0294723	0.0182053	Atp6v1g1	sp|Q9CR51|VATG1_MOUSE V-type proton ATPase subunit G 1 OS=Mus musculus OX=10090 GN=Atp6v1g1 PE=1 SV=3
75943000	74299000	72179000	73468000	77898000	68949000	65160000	0.345905	0.0549661	Atp6v1h	sp|Q8BVE3|VATH_MOUSE V-type proton ATPase subunit H OS=Mus musculus OX=10090 GN=Atp6v1h PE=1 SV=1
7020700	7691800	7898900	5917900	9548200	5774500	6320000	0.240094	0.129481	Atp7a	sp|Q64430|ATP7A_MOUSE Copper-transporting ATPase 1 OS=Mus musculus OX=10090 GN=Atp7a PE=1 SV=3
7140400	5520900	5615900	4474000	6139900	4682000	7086500	0.231846	0.122718	Atpaf1	sp|Q811I0|ATPF1_MOUSE ATP synthase mitochondrial F1 complex assembly factor 1 OS=Mus musculus OX=10090 GN=Atpaf1 PE=1 SV=1
174660	174660	2666900	174660	3019400	4458200	8210900	0.663488	-1.97983	Atpaf2	sp|Q91YY4|ATPF2_MOUSE ATP synthase mitochondrial F1 complex assembly factor 2 OS=Mus musculus OX=10090 GN=Atpaf2 PE=1 SV=1
384350000	485130000	467970000	669830000	380480000	323830000	328170000	0.0710936	0.0670287	Atpif1	sp|O35143|ATIF1_MOUSE ATPase inhibitor, mitochondrial OS=Mus musculus OX=10090 GN=Atp5if1 PE=1 SV=2
168260000	145360000	116640000	161010000	167350000	154100000	181000000	0.756721	-0.209763	Atr	sp|Q9JKK8|ATR_MOUSE Serine/threonine-protein kinase ATR OS=Mus musculus OX=10090 GN=Atr PE=1 SV=2
7709700	6937500	14361000	8650900	13023000	6420800	8357300	0.0771777	0.0855003	Atrip	sp|Q8BMG1|ATRIP_MOUSE ATR-interacting protein OS=Mus musculus OX=10090 GN=Atrip PE=1 SV=2
164860000	216840000	139400000	118890000	122040000	100110000	106500000	1.5649	0.634581	Atrx	sp|Q61687|ATRX_MOUSE Transcriptional regulator ATRX OS=Mus musculus OX=10090 GN=Atrx PE=1 SV=3
78307000	74984000	78039000	78306000	72929000	87204000	123290000	0.434901	-0.229919	Atxn10	sp|P28658|ATX10_MOUSE Ataxin-10 OS=Mus musculus OX=10090 GN=Atxn10 PE=1 SV=2
33562000	29537000	27666000	26910000	25749000	27040000	32729000	0.393554	0.106244	Atxn2	sp|O70305|ATX2_MOUSE Ataxin-2 OS=Mus musculus OX=10090 GN=Atxn2 PE=1 SV=1
96265000	88545000	85176000	103220000	105860000	107460000	107390000	2.51482	-0.235904	Atxn2l	sp|Q7TQH0|ATX2L_MOUSE Ataxin-2-like protein OS=Mus musculus OX=10090 GN=Atxn2l PE=1 SV=1
6576100	7989500	7852800	8890900	6674700	8907300	12916000	0.537963	-0.322889	Atxn3	sp|Q9CVD2|ATX3_MOUSE Ataxin-3 OS=Mus musculus OX=10090 GN=Atxn3 PE=1 SV=2
13933000	13799000	13735000	17171000	20063000	12024000	11481000	0.220267	-0.135622	Atxn7l3b	sp|Q3UD01|A7L3B_MOUSE Ataxin-7-like protein 3B OS=Mus musculus OX=10090 GN=Atxn7l3b PE=1 SV=1
41452000	52712000	45034000	32259000	31641000	18012000	13135000	1.79039	0.965463	AU015836	tr|B2RUM3|B2RUM3_MOUSE AU015836 protein OS=Mus musculus OX=10090 GN=AU015836 PE=1 SV=1
12137000	4387800	17396000	11953000	5880400	3641300	4244400	0.578046	0.814368	AU019823	tr|E9PUQ3|E9PUQ3_MOUSE NKAP domain-containing 1 OS=Mus musculus OX=10090 GN=Nkapd1 PE=1 SV=1
14773000	10446000	10867000	7601100	9631000	9847000	9575600	1.09586	0.392479	AU022751	sp|B1B0V2|EZHIP_MOUSE EZH inhibitory protein OS=Mus musculus OX=10090 GN=Ezhip PE=1 SV=1
18079000	14367000	12940000	15530000	17197000	22567000	17355000	0.640501	-0.263658	Auh	sp|Q9JLZ3|AUHM_MOUSE Methylglutaconyl-CoA hydratase, mitochondrial OS=Mus musculus OX=10090 GN=Auh PE=1 SV=1
19929000	18213000	16785000	17434000	23774000	21329000	30508000	0.703615	-0.345376	Aup1	sp|P70295|AUP1_MOUSE Lipid droplet-regulating VLDL assembly factor AUP1 OS=Mus musculus OX=10090 GN=Aup1 PE=1 SV=1
15727000	11611000	13458000	11849000	17193000	17225000	11955000	0.178429	-0.0980992	Aurka	sp|P97477|AURKA_MOUSE Aurora kinase A OS=Mus musculus OX=10090 GN=Aurka PE=1 SV=1
3146000	174660	3122300	4282800	174660	3301200	4425000	0.253332	-0.504115	Aurkb	sp|O70126|AURKB_MOUSE Aurora kinase B OS=Mus musculus OX=10090 GN=Aurkb PE=1 SV=2
1930800	174660	174660	174660	174660	2858000	1746900	0.204875	-0.704511	Aurkc	sp|O88445|AURKC_MOUSE Aurora kinase C OS=Mus musculus OX=10090 GN=Aurkc PE=1 SV=2
106670000	82458000	110740000	134860000	129900000	135000000	178000000	1.48247	-0.531105	Aven	sp|Q9D9K3|AVEN_MOUSE Cell death regulator Aven OS=Mus musculus OX=10090 GN=Aven PE=1 SV=2
7712700	8217700	7914300	6807700	8723600	8383600	8842100	0.161077	-0.0430971	Avl9	sp|Q80U56|AVL9_MOUSE Late secretory pathway protein AVL9 homolog OS=Mus musculus OX=10090 GN=Avl9 PE=1 SV=2
3231800	174660	1981200	7191100	8390200	8062100	10801000	2.66384	-2.2615	Axdnd1	sp|Q3UZ57|AXDN1_MOUSE Axonemal dynein light chain domain-containing protein 1 OS=Mus musculus OX=10090 GN=Axdnd1 PE=1 SV=1
174660	174660	174660	174660	1859900	174660	1702300	0.690313	-2.48511	Axin1	sp|O35625|AXIN1_MOUSE Axin-1 OS=Mus musculus OX=10090 GN=Axin1 PE=1 SV=3
7011800	10457000	8168200	6724300	2402200	6745800	4022700	1.18119	0.780859	Azgp1	sp|Q64726|ZA2G_MOUSE Zinc-alpha-2-glycoprotein OS=Mus musculus OX=10090 GN=Azgp1 PE=1 SV=2
56917000	66661000	51840000	64229000	68002000	73625000	40468000	0.122893	-0.0747229	B2m	sp|P01887|B2MG_MOUSE Beta-2-microglobulin OS=Mus musculus OX=10090 GN=B2m PE=1 SV=2
21909000	174660	11837000	11285000	9773300	11593000	12608000	0.000494171	-0.00101253	B3galnt1	sp|Q920V1|B3GL1_MOUSE UDP-GalNAc:beta-1,3-N-acetylgalactosaminyltransferase 1 OS=Mus musculus OX=10090 GN=B3galnt1 PE=2 SV=2
4481900	5581300	5053100	5416800	6466600	5667400	7731900	0.941592	-0.327008	B3galt6	sp|Q91Z92|B3GT6_MOUSE Beta-1,3-galactosyltransferase 6 OS=Mus musculus OX=10090 GN=B3galt6 PE=2 SV=1
3573700	2510500	5196300	1463100	74539000	3849100	4009400	0.34395	-2.47912	B3galtl	sp|Q8BHT6|B3GLT_MOUSE Beta-1,3-glucosyltransferase OS=Mus musculus OX=10090 GN=B3glct PE=1 SV=3
1862200	1748400	1315900	2279500	174660	1318600	2568900	0.0295088	0.05074	B4galnt1	sp|Q09200|B4GN1_MOUSE Beta-1,4 N-acetylgalactosaminyltransferase 1 OS=Mus musculus OX=10090 GN=B4galnt1 PE=1 SV=1
174660	174660	174660	174660	174660	174660	6559800	0.359928	-3.3419	B9d2	sp|Q3UK10|B9D2_MOUSE B9 domain-containing protein 2 OS=Mus musculus OX=10090 GN=B9d2 PE=1 SV=2
11310000	18104000	13833000	16623000	18311000	17923000	15156000	0.651266	-0.238173	Babam1	sp|Q3UI43|BABA1_MOUSE BRISC and BRCA1-A complex member 1 OS=Mus musculus OX=10090 GN=Babam1 PE=1 SV=1
25055000	22683000	19534000	28072000	28111000	40377000	51479000	1.07353	-0.722862	Bad	sp|Q61337|BAD_MOUSE Bcl2-associated agonist of cell death OS=Mus musculus OX=10090 GN=Bad PE=1 SV=1
31850000	42343000	45948000	31973000	30830000	29118000	27987000	1.38383	0.417838	Bag1	sp|Q60739|BAG1_MOUSE BAG family molecular chaperone regulator 1 OS=Mus musculus OX=10090 GN=Bag1 PE=1 SV=3
76871000	99105000	105510000	74346000	64449000	74121000	119160000	0.27178	0.176587	Bag2	sp|Q91YN9|BAG2_MOUSE BAG family molecular chaperone regulator 2 OS=Mus musculus OX=10090 GN=Bag2 PE=1 SV=1
10145000	23479000	13954000	21322000	15709000	14135000	18723000	0.160975	-0.139733	Bag3	sp|Q9JLV1|BAG3_MOUSE BAG family molecular chaperone regulator 3 OS=Mus musculus OX=10090 GN=Bag3 PE=1 SV=2
19818000	18977000	18748000	19487000	12891000	15743000	20847000	0.387513	0.153751	Bag4	sp|Q8CI61|BAG4_MOUSE BAG family molecular chaperone regulator 4 OS=Mus musculus OX=10090 GN=Bag4 PE=1 SV=2
26442000	20912000	28901000	18879000	21572000	30983000	32991000	0.0526943	-0.0385258	Bag5	sp|Q8CI32|BAG5_MOUSE BAG family molecular chaperone regulator 5 OS=Mus musculus OX=10090 GN=Bag5 PE=1 SV=1
90542000	78374000	88514000	78331000	93878000	95694000	113510000	0.466762	-0.152136	Bag6	sp|Q9Z1R2|BAG6_MOUSE Large proline-rich protein BAG6 OS=Mus musculus OX=10090 GN=Bag6 PE=1 SV=1
11128000	10359000	9609700	11638000	11244000	18206000	12817000	0.769375	-0.37862	Baiap2	sp|Q8BKX1|BAIP2_MOUSE Brain-specific angiogenesis inhibitor 1-associated protein 2 OS=Mus musculus OX=10090 GN=Baiap2 PE=1 SV=2
2742300	3280200	174660	174660	3126000	3959700	174660	0.0508291	0.152308	Baiap2l1	sp|Q9DBJ3|BI2L1_MOUSE Brain-specific angiogenesis inhibitor 1-associated protein 2-like protein 1 OS=Mus musculus OX=10090 GN=Baiap2l1 PE=1 SV=1
5083000	11702000	5163500	5759700	5625800	3070900	1997300	0.708772	0.830748	Baiap2l2	sp|Q80Y61|BI2L2_MOUSE Brain-specific angiogenesis inhibitor 1-associated protein 2-like protein 2 OS=Mus musculus OX=10090 GN=Baiap2l2 PE=1 SV=1
285840000	380510000	386180000	318970000	353920000	300210000	379290000	0.139268	0.0533876	Banf1	sp|O54962|BAF_MOUSE Barrier-to-autointegration factor OS=Mus musculus OX=10090 GN=Banf1 PE=1 SV=1
15677000	18245000	23712000	15000000	21231000	14057000	11162000	0.548987	0.322545	Bap18	sp|Q9DCT6|BAP18_MOUSE Chromatin complexes subunit BAP18 OS=Mus musculus OX=10090 GN=Bap18 PE=1 SV=1
344500000	379290000	425740000	308880000	310880000	341930000	243990000	1.32203	0.346235	Basp1	sp|Q91XV3|BASP1_MOUSE Brain acid soluble protein 1 OS=Mus musculus OX=10090 GN=Basp1 PE=1 SV=3
48900000	41749000	37029000	33788000	33837000	35716000	34658000	1.39197	0.30289	Bax	sp|Q07813|BAX_MOUSE Apoptosis regulator BAX OS=Mus musculus OX=10090 GN=Bax PE=1 SV=1
33918000	21953000	26624000	42444000	45065000	58639000	75715000	1.49624	-1.01225	Baz1a	sp|O88379|BAZ1A_MOUSE Bromodomain adjacent to zinc finger domain protein 1A OS=Mus musculus OX=10090 GN=Baz1a PE=1 SV=3
181940000	209010000	192050000	135500000	147330000	123240000	95855000	2.27507	0.631062	Baz1b	sp|Q9Z277|BAZ1B_MOUSE Tyrosine-protein kinase BAZ1B OS=Mus musculus OX=10090 GN=Baz1b PE=1 SV=2
18172000	13529000	19550000	18770000	17977000	24140000	21986000	0.765287	-0.278284	Baz2a	sp|Q91YE5|BAZ2A_MOUSE Bromodomain adjacent to zinc finger domain protein 2A OS=Mus musculus OX=10090 GN=Baz2a PE=1 SV=2
6498100	6131600	5952400	8529600	5790800	5321600	5091100	0.00374669	0.00250798	Bbip1	tr|J3QMK2|J3QMK2_MOUSE BBSome-interacting protein 1 OS=Mus musculus OX=10090 GN=Bbip1 PE=1 SV=1
174660	174660	174660	174660	174660	174660	174660	#DIV/0!	0	Bbox1	sp|Q924Y0|BODG_MOUSE Gamma-butyrobetaine dioxygenase OS=Mus musculus OX=10090 GN=Bbox1 PE=1 SV=1
7734100	174660	8376000	5260900	11623000	9518900	17281000	0.706583	-1.00854	Bbs1	sp|Q3V3N7|BBS1_MOUSE Bardet-Biedl syndrome 1 protein homolog OS=Mus musculus OX=10090 GN=Bbs1 PE=1 SV=1
24149000	13441000	21605000	19324000	25201000	24056000	24169000	0.497493	-0.232834	Bbs2	sp|Q9CWF6|BBS2_MOUSE Bardet-Biedl syndrome 2 protein homolog OS=Mus musculus OX=10090 GN=Bbs2 PE=1 SV=1
174660	174660	174660	174660	1593900	174660	1938800	0.682869	-2.47419	Bbs5	sp|Q9CZQ9|BBS5_MOUSE Bardet-Biedl syndrome 5 protein homolog OS=Mus musculus OX=10090 GN=Bbs5 PE=1 SV=1
20687000	18227000	9310600	19354000	25063000	17694000	17576000	0.481851	-0.309538	Bbs7	sp|Q8K2G4|BBS7_MOUSE Bardet-Biedl syndrome 7 protein homolog OS=Mus musculus OX=10090 GN=Bbs7 PE=1 SV=1
15021000	10059000	17121000	11038000	14289000	7897000	19055000	0.110139	0.106083	Bbs9	sp|Q811G0|PTHB1_MOUSE Protein PTHB1 OS=Mus musculus OX=10090 GN=Bbs9 PE=1 SV=2
11098000	13433000	10347000	9069000	6677000	4603400	5859000	1.87017	0.827326	Bbx	sp|Q8VBW5|BBX_MOUSE HMG box transcription factor BBX OS=Mus musculus OX=10090 GN=Bbx PE=1 SV=2
13111000	4060500	12909000	16789000	36235000	18944000	23854000	1.22851	-1.25649	BC005561	tr|E9Q5E2|E9Q5E2_MOUSE THO complex subunit 2 OS=Mus musculus OX=10090 GN=Thoc2l PE=1 SV=1
174660	174660	174660	174660	174660	10059000	15531000	0.656531	-5.21445	BC048502	tr|Q80Y74|Q80Y74_MOUSE Gametocyte-specific factor 2 OS=Mus musculus OX=10090 GN=Gtsf2 PE=1 SV=1
30201000	21722000	43010000	47092000	56087000	63330000	71153000	1.7532	-0.908892	BC049730	tr|Q810N3|Q810N3_MOUSE Ly6/PLAUR domain-containing 10 OS=Mus musculus OX=10090 GN=Lypd10 PE=1 SV=1
11091000	15556000	10946000	7714400	7988000	6397200	18791000	0.257263	0.293732	Bcam	sp|Q9R069|BCAM_MOUSE Basal cell adhesion molecule OS=Mus musculus OX=10090 GN=Bcam PE=1 SV=1
121990000	69604000	89267000	106280000	99411000	107930000	95632000	0.267397	-0.128099	Bcap29	sp|Q61334|BAP29_MOUSE B-cell receptor-associated protein 29 OS=Mus musculus OX=10090 GN=Bcap29 PE=1 SV=1
117470000	114820000	105380000	86725000	101990000	83742000	72539000	1.70034	0.384072	Bcap31	sp|Q61335|BAP31_MOUSE B-cell receptor-associated protein 31 OS=Mus musculus OX=10090 GN=Bcap31 PE=1 SV=4
9989100	9337400	6939200	8794100	17261000	8670700	8179100	0.303152	-0.292925	Bcar1	sp|Q61140|BCAR1_MOUSE Breast cancer anti-estrogen resistance protein 1 OS=Mus musculus OX=10090 GN=Bcar1 PE=1 SV=2
45744000	53169000	46005000	43092000	38723000	35713000	25710000	1.31296	0.43186	Bcas2	sp|Q9D287|SPF27_MOUSE Pre-mRNA-splicing factor SPF27 OS=Mus musculus OX=10090 GN=Bcas2 PE=1 SV=1
35703000	35901000	32284000	32334000	43209000	42219000	44554000	0.839731	-0.228739	Bcas3	sp|Q8CCN5|BCAS3_MOUSE Breast carcinoma-amplified sequence 3 homolog OS=Mus musculus OX=10090 GN=Bcas3 PE=1 SV=2
348730000	440340000	333760000	325070000	381680000	290170000	274390000	0.670969	0.235861	Bcat2	sp|O35855|BCAT2_MOUSE Branched-chain-amino-acid aminotransferase, mitochondrial OS=Mus musculus OX=10090 GN=Bcat2 PE=1 SV=2
15178000	9297500	19750000	15888000	19164000	20405000	27340000	0.747313	-0.489663	Bccip	sp|Q9CWI3|BCCIP_MOUSE BRCA2 and CDKN1A-interacting protein OS=Mus musculus OX=10090 GN=Bccip PE=1 SV=1
19850000	27147000	20854000	17201000	15740000	18976000	14349000	1.3679	0.449139	Bckdha	sp|P50136|ODBA_MOUSE 2-oxoisovalerate dehydrogenase subunit alpha, mitochondrial OS=Mus musculus OX=10090 GN=Bckdha PE=1 SV=1
174660	9203200	174660	174660	174660	8169100	7126900	0.0717825	-0.29674	Bckdk	sp|O55028|BCKD_MOUSE [3-methyl-2-oxobutanoate dehydrogenase [lipoamide]] kinase, mitochondrial OS=Mus musculus OX=10090 GN=Bckdk PE=1 SV=1
7936100	10668000	9171900	6112100	11828000	11112000	15146000	0.325874	-0.255108	Bcl2l1	sp|Q64373|B2CL1_MOUSE Bcl-2-like protein 1 OS=Mus musculus OX=10090 GN=Bcl2l1 PE=1 SV=1
174660	174660	174660	174660	3857300	4960400	174660	0.678788	-3.71383	Bcl2l12	tr|Q9D3J3|Q9D3J3_MOUSE BCL2-like 12 (proline-rich) OS=Mus musculus OX=10090 GN=Bcl2l12 PE=1 SV=1
18685000	31920000	25463000	21650000	14689000	22746000	23884000	0.517557	0.289755	Bcl2l13	sp|P59017|B2L13_MOUSE Bcl-2-like protein 13 OS=Mus musculus OX=10090 GN=Bcl2l13 PE=1 SV=2
11301000	2846800	17255000	10934000	10360000	13226000	15222000	0.206827	-0.248534	Bcl7c;Bcl7b;Bcl7a	sp|O08664|BCL7C_MOUSE B-cell CLL/lymphoma 7 protein family member C OS=Mus musculus OX=10090 GN=Bcl7c PE=1 SV=1;sp|Q921K9|BCL7B_MOUSE B-cell CLL/lymphoma 7 protein family member B OS=Mus musculus OX=10090 GN=Bcl7b PE=1 SV=1;sp|Q9CXE2|BCL7A_MOUSE B-cell CLL
6597700	10802000	6242900	7767300	4452100	3212700	1726300	0.901615	0.877511	Bcl9l	sp|Q67FY2|BCL9L_MOUSE B-cell CLL/lymphoma 9-like protein OS=Mus musculus OX=10090 GN=Bcl9l PE=1 SV=1
146310000	132730000	140570000	133600000	124220000	126970000	90807000	0.868218	0.234347	Bclaf1	sp|Q8K019|BCLF1_MOUSE Bcl-2-associated transcription factor 1 OS=Mus musculus OX=10090 GN=Bclaf1 PE=1 SV=2
10402000	174660	174660	2717500	2126400	174660	15693000	0.115722	-0.530885	Bclaf3	sp|A2AG58|BCLA3_MOUSE BCLAF1 and THRAP3 family member 3 OS=Mus musculus OX=10090 GN=Bclaf3 PE=1 SV=1
6405000	10406000	174660	3332400	174660	3589600	8671800	0.208481	0.522313	Bcr	sp|Q6PAJ1|BCR_MOUSE Breakpoint cluster region protein OS=Mus musculus OX=10090 GN=Bcr PE=1 SV=3
7906000	7840300	7074300	6982800	5470900	8002400	10360000	0.0267076	-0.0183101	Bcs1l	sp|Q9CZP5|BCS1_MOUSE Mitochondrial chaperone BCS1 OS=Mus musculus OX=10090 GN=Bcs1l PE=1 SV=1
29612000	27586000	24277000	18547000	22613000	24921000	23320000	1.17102	0.281104	Bdh1	sp|Q80XN0|BDH_MOUSE D-beta-hydroxybutyrate dehydrogenase, mitochondrial OS=Mus musculus OX=10090 GN=Bdh1 PE=1 SV=2
18825000	9459700	17165000	174660	18274000	174660	174660	0.868723	1.68873	Bdh2	sp|Q8JZV9|BDH2_MOUSE 3-hydroxybutyrate dehydrogenase type 2 OS=Mus musculus OX=10090 GN=Bdh2 PE=1 SV=1
15105000	10650000	14655000	11024000	15263000	17779000	18025000	0.392635	-0.204634	Becn1	sp|O88597|BECN1_MOUSE Beclin-1 OS=Mus musculus OX=10090 GN=Becn1 PE=1 SV=3
25734000	19820000	13972000	19714000	22910000	24619000	35401000	0.536577	-0.37102	Bet1	sp|O35623|BET1_MOUSE BET1 homolog OS=Mus musculus OX=10090 GN=Bet1 PE=1 SV=1
26533000	16792000	13216000	19073000	28642000	20458000	18666000	0.26927	-0.204008	Bet1l	sp|O35153|BET1L_MOUSE BET1-like protein OS=Mus musculus OX=10090 GN=Bet1l PE=3 SV=1
4522900	8830100	4524300	4835500	3026000	174660	7111100	0.455529	0.65411	Bfar	sp|Q8R079|BFAR_MOUSE Bifunctional apoptosis regulator OS=Mus musculus OX=10090 GN=Bfar PE=1 SV=1
120760000	177230000	135210000	150390000	145870000	137230000	177100000	0.182932	-0.0801332	Bgn	sp|P28653|PGS1_MOUSE Biglycan OS=Mus musculus OX=10090 GN=Bgn PE=1 SV=1
16949000	30521000	8079900	82954000	55259000	59102000	73018000	2.48258	-1.86784	Bhmt	sp|O35490|BHMT1_MOUSE Betaine--homocysteine S-methyltransferase 1 OS=Mus musculus OX=10090 GN=Bhmt PE=1 SV=1
28645000	22805000	23993000	21373000	19875000	20767000	16354000	1.41126	0.360141	Bicd2	sp|Q921C5|BICD2_MOUSE Protein bicaudal D homolog 2 OS=Mus musculus OX=10090 GN=Bicd2 PE=1 SV=1
26361000	24155000	24627000	20455000	18099000	19019000	17796000	3.00253	0.410705	Bid	sp|P70444|BID_MOUSE BH3-interacting domain death agonist OS=Mus musculus OX=10090 GN=Bid PE=1 SV=2
55138000	110040000	76650000	62575000	46994000	63630000	40796000	0.886778	0.591442	Bin1	sp|O08539|BIN1_MOUSE Myc box-dependent-interacting protein 1 OS=Mus musculus OX=10090 GN=Bin1 PE=1 SV=1
20733000	19386000	26118000	23905000	33662000	37737000	26425000	0.99798	-0.462926	Bin2	sp|D3Z6Q9|BIN2_MOUSE Bridging integrator 2 OS=Mus musculus OX=10090 GN=Bin2 PE=1 SV=1
18392000	25156000	22590000	26145000	20802000	31804000	17985000	0.212321	-0.133536	Bin3	sp|Q9JI08|BIN3_MOUSE Bridging integrator 3 OS=Mus musculus OX=10090 GN=Bin3 PE=1 SV=1
6934200	8591500	9239600	4201300	13234000	9978700	13462000	0.31266	-0.307896	Birc2	sp|Q62210|BIRC2_MOUSE Baculoviral IAP repeat-containing protein 2 OS=Mus musculus OX=10090 GN=Birc2 PE=1 SV=1
174660	174660	7644900	174660	13116000	174660	8446300	0.264057	-1.03963	Birc5	sp|O70201|BIRC5_MOUSE Baculoviral IAP repeat-containing protein 5 OS=Mus musculus OX=10090 GN=Birc5 PE=1 SV=1
36303000	27752000	32936000	28366000	34587000	35127000	38210000	0.214439	-0.0757194	Birc6	sp|O88738|BIRC6_MOUSE Baculoviral IAP repeat-containing protein 6 OS=Mus musculus OX=10090 GN=Birc6 PE=1 SV=2
19708000	8579800	15287000	17105000	19001000	16768000	29812000	0.630361	-0.509112	Bles03	sp|Q8VD62|CK068_MOUSE UPF0696 protein C11orf68 homolog OS=Mus musculus OX=10090 GN=Bles03 PE=1 SV=2
8017700	6469900	5523100	8014000	7126500	5353900	11018000	0.332749	-0.240111	Blm	sp|O88700|BLM_MOUSE Bloom syndrome protein homolog OS=Mus musculus OX=10090 GN=Blm PE=1 SV=1
86934000	88499000	99782000	82285000	90133000	82411000	77601000	0.929388	0.142546	Blmh	sp|Q8R016|BLMH_MOUSE Bleomycin hydrolase OS=Mus musculus OX=10090 GN=Blmh PE=1 SV=1
174660	174660	174660	174660	174660	32264000	174660	0.359928	-5.55247	Bloc1s1	sp|O55102|BL1S1_MOUSE Biogenesis of lysosome-related organelles complex 1 subunit 1 OS=Mus musculus OX=10090 GN=Bloc1s1 PE=1 SV=2
25903000	19394000	27071000	28953000	28059000	28808000	22757000	0.513706	-0.170257	Bloc1s2	sp|Q9CWG9|BL1S2_MOUSE Biogenesis of lysosome-related organelles complex 1 subunit 2 OS=Mus musculus OX=10090 GN=Bloc1s2 PE=1 SV=1
12324000	8865200	11442000	10701000	10628000	11990000	16762000	0.365152	-0.202974	Bloc1s3	sp|Q5U5M8|BL1S3_MOUSE Biogenesis of lysosome-related organelles complex 1 subunit 3 OS=Mus musculus OX=10090 GN=Bloc1s3 PE=1 SV=1
3406600	12750000	6891300	9759800	4461000	10549000	7213500	0.0384035	-0.057646	Bloc1s4	sp|Q8VED2|BL1S4_MOUSE Biogenesis of lysosome-related organelles complex 1 subunit 4 OS=Mus musculus OX=10090 GN=Bloc1s4 PE=1 SV=1
126140000	98633000	12888000	152770000	200020000	258570000	19190000	0.533478	-0.992668	Bloc1s5	sp|Q8R015|BL1S5_MOUSE Biogenesis of lysosome-related organelles complex 1 subunit 5 OS=Mus musculus OX=10090 GN=Bloc1s5 PE=1 SV=1
174660	174660	174660	174660	2601500	174660	174660	0.359928	-2.16146	Bloc1s6	sp|Q9R0C0|BL1S6_MOUSE Biogenesis of lysosome-related organelles complex 1 subunit 6 OS=Mus musculus OX=10090 GN=Bloc1s6 PE=1 SV=1
48929000	49685000	56008000	48974000	45433000	51601000	54509000	0.184889	0.0400585	Blvra	sp|Q9CY64|BIEA_MOUSE Biliverdin reductase A OS=Mus musculus OX=10090 GN=Blvra PE=1 SV=1
81784000	75126000	72261000	95981000	77834000	69853000	64025000	0.0210106	-0.0100296	Blvrb	sp|Q923D2|BLVRB_MOUSE Flavin reductase (NADPH) OS=Mus musculus OX=10090 GN=Blvrb PE=1 SV=3
15832000	14607000	16646000	19448000	10712000	9297900	12096000	0.456699	0.284223	Bmp2k	sp|Q91Z96|BMP2K_MOUSE BMP-2-inducible protein kinase OS=Mus musculus OX=10090 GN=Bmp2k PE=1 SV=1
17881000	17529000	17900000	20841000	15791000	12228000	13401000	0.426945	0.191115	Bms1	tr|Q6PGF5|Q6PGF5_MOUSE BMS1 homolog, ribosome assembly protein (Yeast) OS=Mus musculus OX=10090 GN=Bms1 PE=1 SV=1
14499000	17179000	10001000	16592000	18591000	24463000	13852000	0.66021	-0.403347	Bnip1	sp|Q6QD59|SEC20_MOUSE Vesicle transport protein SEC20 OS=Mus musculus OX=10090 GN=Bnip1 PE=1 SV=1
6862200	3017400	8873100	3154800	9747000	6756800	12964000	0.271244	-0.383736	Bnip2	sp|O54940|BNIP2_MOUSE BCL2/adenovirus E1B 19 kDa protein-interacting protein 2 OS=Mus musculus OX=10090 GN=Bnip2 PE=1 SV=2
7282100	10376000	13051000	8472500	7097800	11226000	5629000	0.479207	0.336584	Bnip3l	sp|Q9Z2F7|BNI3L_MOUSE BCL2/adenovirus E1B 19 kDa protein-interacting protein 3-like OS=Mus musculus OX=10090 GN=Bnip3l PE=1 SV=1
10359000	6108800	8490400	174660	8053100	4665800	6686400	0.713163	0.765174	Bod1	sp|Q5SQY2|BOD1_MOUSE Biorientation of chromosomes in cell division protein 1 OS=Mus musculus OX=10090 GN=Bod1 PE=3 SV=1
34288000	30713000	30265000	28128000	23812000	23117000	21646000	1.92659	0.393438	Bod1l	sp|E9Q6J5|BD1L1_MOUSE Biorientation of chromosomes in cell division protein 1-like 1 OS=Mus musculus OX=10090 GN=Bod1l PE=1 SV=1
27042000	20063000	24757000	14504000	25206000	19457000	40210000	0.0452332	-0.0526454	Bola1	sp|Q9D8S9|BOLA1_MOUSE BolA-like protein 1 OS=Mus musculus OX=10090 GN=Bola1 PE=1 SV=1
36812000	33263000	38856000	29901000	53160000	37602000	26470000	0.0223441	-0.0186688	Bola2	sp|Q8BGS2|BOLA2_MOUSE BolA-like protein 2 OS=Mus musculus OX=10090 GN=Bola2 PE=1 SV=1
11225000	11089000	13644000	8449300	174660	14932000	17801000	0.131169	0.21322	Bola3	sp|Q8CEI1|BOLA3_MOUSE BolA-like protein 3 OS=Mus musculus OX=10090 GN=Bola3 PE=1 SV=1
22858000	6865900	16016000	14047000	25324000	63280000	88523000	0.752991	-1.64832	Boll	sp|Q924M5|BOLL_MOUSE Protein boule-like OS=Mus musculus OX=10090 GN=Boll PE=1 SV=2
25167000	23436000	23872000	16346000	19783000	23557000	25552000	0.52553	0.181024	Bop1	sp|P97452|BOP1_MOUSE Ribosome biogenesis protein BOP1 OS=Mus musculus OX=10090 GN=Bop1 PE=1 SV=1
28937000	17929000	24470000	24653000	27431000	38033000	40318000	0.806246	-0.455591	Bpgm	sp|P15327|PMGE_MOUSE Bisphosphoglycerate mutase OS=Mus musculus OX=10090 GN=Bpgm PE=1 SV=2
20629000	21864000	31115000	24450000	22064000	23085000	27492000	0.0289	0.0155625	Bphl	sp|Q8R164|BPHL_MOUSE Valacyclovir hydrolase OS=Mus musculus OX=10090 GN=Bphl PE=1 SV=1
70517000	40244000	58070000	62976000	67479000	72873000	79006000	0.824505	-0.326786	Bpnt1	sp|Q9Z0S1|BPNT1_MOUSE 3(2),5-bisphosphate nucleotidase 1 OS=Mus musculus OX=10090 GN=Bpnt1 PE=1 SV=2
15792000	11001000	17193000	15987000	13765000	10105000	11027000	0.373108	0.20487	Bptf	tr|A2A654|A2A654_MOUSE Bromodomain PHD finger transcription factor OS=Mus musculus OX=10090 GN=Bptf PE=1 SV=1
3152000	2466600	174660	174660	4742900	3414000	2879500	0.259246	-0.537438	Braf	sp|P28028|BRAF_MOUSE Serine/threonine-protein kinase B-raf OS=Mus musculus OX=10090 GN=Braf PE=1 SV=4
8587300	6803400	4705800	7442000	8604000	9566900	8281600	0.798806	-0.339069	Brap	sp|Q99MP8|BRAP_MOUSE BRCA1-associated protein OS=Mus musculus OX=10090 GN=Brap PE=1 SV=1
18380000	19686000	18600000	13731000	16976000	13143000	20412000	0.658632	0.233555	Brat1	sp|Q8C3R1|BRAT1_MOUSE BRCA1-associated ATM activator 1 OS=Mus musculus OX=10090 GN=Brat1 PE=1 SV=1
12311000	11392000	5880800	13190000	13490000	14986000	16956000	1.23161	-0.571597	Brcc3	sp|P46737|BRCC3_MOUSE Lys-63-specific deubiquitinase BRCC36 OS=Mus musculus OX=10090 GN=Brcc3 PE=1 SV=1
23273000	12644000	16441000	22707000	26574000	26630000	34153000	1.32474	-0.656823	Brd1	sp|G5E8P1|BRD1_MOUSE Bromodomain-containing protein 1 OS=Mus musculus OX=10090 GN=Brd1 PE=1 SV=1
20349000	17152000	23398000	22487000	19880000	25936000	24181000	0.60972	-0.187748	Brd2	sp|Q7JJ13|BRD2_MOUSE Bromodomain-containing protein 2 OS=Mus musculus OX=10090 GN=Brd2 PE=1 SV=1
23535000	26905000	26683000	24797000	20011000	24184000	23633000	0.785673	0.150797	Brd3	sp|Q8K2F0|BRD3_MOUSE Bromodomain-containing protein 3 OS=Mus musculus OX=10090 GN=Brd3 PE=1 SV=2
27022000	35870000	39950000	28464000	23167000	20186000	27304000	1.22641	0.468204	Brd4	sp|Q9ESU6|BRD4_MOUSE Bromodomain-containing protein 4 OS=Mus musculus OX=10090 GN=Brd4 PE=1 SV=2
25094000	16572000	18648000	21464000	19895000	19770000	39410000	0.353493	-0.322153	Brd7	sp|O88665|BRD7_MOUSE Bromodomain-containing protein 7 OS=Mus musculus OX=10090 GN=Brd7 PE=1 SV=1
17909000	12073000	14061000	12196000	14322000	20590000	19682000	0.296893	-0.185682	Brd8	sp|Q8R3B7|BRD8_MOUSE Bromodomain-containing protein 8 OS=Mus musculus OX=10090 GN=Brd8 PE=1 SV=2
174660	174660	174660	174660	174660	174660	174660	#DIV/0!	0	Brd9	sp|Q3UQU0|BRD9_MOUSE Bromodomain-containing protein 9 OS=Mus musculus OX=10090 GN=Brd9 PE=1 SV=1
73181000	51192000	45270000	63129000	74026000	59157000	55534000	0.313105	-0.155002	Brdt	sp|Q91Y44|BRDT_MOUSE Bromodomain testis-specific protein OS=Mus musculus OX=10090 GN=Brdt PE=1 SV=3
5916900	3822000	11121000	5401400	6183700	9705200	5760200	0.0300366	0.0401145	Bre	sp|Q8K3W0|BABA2_MOUSE BRISC and BRCA1-A complex member 2 OS=Mus musculus OX=10090 GN=Babam2 PE=1 SV=2
3829100	3188400	174660	174660	174660	174660	174660	1.18769	3.77884	Brf1	sp|Q8CFK2|TF3B_MOUSE Transcription factor IIIB 90 kDa subunit OS=Mus musculus OX=10090 GN=Brf1 PE=1 SV=1
31764000	18550000	12302000	9110600	16518000	23691000	37003000	0.0283187	-0.0481695	Bri3bp	sp|Q8BXV2|BRI3B_MOUSE BRI3-binding protein OS=Mus musculus OX=10090 GN=Bri3bp PE=1 SV=1
18217000	17680000	22817000	23016000	22233000	14821000	15899000	0.0721256	0.0433312	Brix1	sp|Q9DCA5|BRX1_MOUSE Ribosome biogenesis protein BRX1 homolog OS=Mus musculus OX=10090 GN=Brix1 PE=1 SV=3
33426000	37014000	39368000	28025000	49151000	38894000	40827000	0.190881	-0.0997971	Brk1	sp|Q91VR8|BRK1_MOUSE Protein BRICK1 OS=Mus musculus OX=10090 GN=Brk1 PE=1 SV=1
25629000	17065000	21756000	17919000	15744000	23951000	23702000	0.134584	0.0796786	Brox	sp|Q8K2Q7|BROX_MOUSE BRO1 domain-containing protein BROX OS=Mus musculus OX=10090 GN=Brox PE=1 SV=1
916430	174660	174660	174660	174660	1394800	1396500	0.327399	-0.896019	Brwd1	sp|Q921C3|BRWD1_MOUSE Bromodomain and WD repeat-containing protein 1 OS=Mus musculus OX=10090 GN=Brwd1 PE=1 SV=2
17637000	19035000	16031000	13225000	17894000	20934000	19740000	0.0628221	-0.0309206	Bsdc1	sp|Q80Y55|BSDC1_MOUSE BSD domain-containing protein 1 OS=Mus musculus OX=10090 GN=Bsdc1 PE=1 SV=1
114630000	99209000	138130000	114340000	112580000	109400000	89586000	0.404311	0.139951	Bsg	sp|P18572|BASI_MOUSE Basigin OS=Mus musculus OX=10090 GN=Bsg PE=1 SV=2
174660	174660	174660	174660	174660	174660	4638900	0.359928	-2.88555	Bspry	sp|Q80YW5|BSPRY_MOUSE B box and SPRY domain-containing protein OS=Mus musculus OX=10090 GN=Bspry PE=1 SV=1
4501200	174660	8954400	174660	174660	5828200	4298300	0.291175	0.794787	Bst2	sp|Q8R2Q8|BST2_MOUSE Bone marrow stromal antigen 2 OS=Mus musculus OX=10090 GN=Bst2 PE=1 SV=1
96640000	63506000	81861000	76072000	98816000	113910000	119650000	0.728354	-0.340066	Btaf1	tr|E9QAE3|E9QAE3_MOUSE B-TFIID TATA-box-binding protein-associated factor 1 OS=Mus musculus OX=10090 GN=Btaf1 PE=1 SV=1
7902200	5245700	8448300	174660	10644000	174660	9479500	0.238922	0.492105	Btd	sp|Q8CIF4|BTD_MOUSE Biotinidase OS=Mus musculus OX=10090 GN=Btd PE=1 SV=2
110950000	200020000	167390000	107610000	152590000	97699000	86591000	0.849466	0.520983	Btf3	sp|Q64152|BTF3_MOUSE Transcription factor BTF3 OS=Mus musculus OX=10090 GN=Btf3 PE=1 SV=3
223780000	272690000	243190000	257900000	214930000	243720000	142870000	0.42614	0.198536	Btf3l4	sp|Q9CQH7|BT3L4_MOUSE Transcription factor BTF3 homolog 4 OS=Mus musculus OX=10090 GN=Btf3l4 PE=1 SV=1
9851700	3526800	7637300	9270400	12046000	7966000	10722000	0.769363	-0.513647	Btnl10	sp|Q9JK39|BTNLA_MOUSE Butyrophilin-like protein 10 OS=Mus musculus OX=10090 GN=Btnl10 PE=1 SV=2
174660	174660	174660	174660	174660	174660	3551800	0.359928	-2.54446	Btrc	sp|Q3ULA2|FBW1A_MOUSE F-box/WD repeat-containing protein 1A OS=Mus musculus OX=10090 GN=Btrc PE=1 SV=2
23045000	20475000	25545000	16600000	16526000	20708000	16099000	1.58494	0.397019	Bub1	sp|O08901|BUB1_MOUSE Mitotic checkpoint serine/threonine-protein kinase BUB1 OS=Mus musculus OX=10090 GN=Bub1 PE=1 SV=1
13369000	10197000	13139000	15067000	13803000	20187000	18449000	1.20328	-0.464002	Bub1b	sp|Q9Z1S0|BUB1B_MOUSE Mitotic checkpoint serine/threonine-protein kinase BUB1 beta OS=Mus musculus OX=10090 GN=Bub1b PE=1 SV=2
97681000	79951000	93357000	95426000	90982000	100310000	84684000	0.161539	-0.0397098	Bub3	sp|Q9WVA3|BUB3_MOUSE Mitotic checkpoint protein BUB3 OS=Mus musculus OX=10090 GN=Bub3 PE=1 SV=2
13006000	15092000	11006000	14656000	8073800	10876000	6837600	0.592655	0.366449	Bud13	sp|Q8R149|BUD13_MOUSE BUD13 homolog OS=Mus musculus OX=10090 GN=Bud13 PE=1 SV=1
16449000	14773000	16734000	22170000	15474000	22894000	16017000	0.614089	-0.259748	Bud31	sp|Q6PGH1|BUD31_MOUSE Protein BUD31 homolog OS=Mus musculus OX=10090 GN=Bud31 PE=1 SV=2
15877000	15041000	15911000	13275000	10664000	15816000	13844000	0.839867	0.220234	Bysl	sp|O54825|BYST_MOUSE Bystin OS=Mus musculus OX=10090 GN=Bysl PE=1 SV=3
107500000	117650000	105690000	98756000	127570000	107030000	104280000	0.037034	0.0114398	Bzw1	sp|Q9CQC6|BZW1_MOUSE Basic leucine zipper and W2 domain-containing protein 1 OS=Mus musculus OX=10090 GN=Bzw1 PE=1 SV=1
5575900	3742900	6774800	174660	3889600	5658400	6784300	0.270979	0.37845	Bzw2	sp|Q91VK1|BZW2_MOUSE Basic leucine zipper and W2 domain-containing protein 2 OS=Mus musculus OX=10090 GN=Bzw2 PE=1 SV=1
242630000	501120000	289280000	304620000	288160000	172200000	208690000	0.613466	0.500415	C1qbp	sp|O35658|C1QBP_MOUSE Complement component 1 Q subcomponent-binding protein, mitochondrial OS=Mus musculus OX=10090 GN=C1qbp PE=1 SV=1
11729000	13358000	13885000	12047000	6882200	174660	174660	1.19238	1.43048	C1sa;C1sb	sp|Q8CG14|CS1A_MOUSE Complement C1s-A subcomponent OS=Mus musculus OX=10090 GN=C1sa PE=2 SV=2;sp|Q8CFG8|CS1B_MOUSE Complement C1s-B subcomponent OS=Mus musculus OX=10090 GN=C1sb PE=2 SV=1
15994000	16725000	9741300	9187000	8537900	10592000	15395000	0.567001	0.373126	C2cd5	sp|Q7TPS5|C2CD5_MOUSE C2 domain-containing protein 5 OS=Mus musculus OX=10090 GN=C2cd5 PE=1 SV=2
46517000	38501000	39625000	31616000	53231000	36203000	58972000	0.163767	-0.115334	C2cd6	tr|A0A5F8MPU3|A0A5F8MPU3_MOUSE C2 calcium-dependent domain-containing 6 OS=Mus musculus OX=10090 GN=C2cd6 PE=4 SV=1
267990000	337300000	190260000	350280000	314860000	234360000	225540000	0.116955	-0.0849143	C3	sp|P01027|CO3_MOUSE Complement C3 OS=Mus musculus OX=10090 GN=C3 PE=1 SV=3
11382000	22867000	4712500	7606300	5925000	8927500	3657100	0.653007	0.992158	C4b	sp|P01029|CO4B_MOUSE Complement C4-B OS=Mus musculus OX=10090 GN=C4b PE=1 SV=3
2853500	174660	6765500	2784700	2720900	3091900	7421000	0.131778	-0.294782	C6.1al	sp|Q7M757|BRC3L_MOUSE Lys-63-specific deubiquitinase BRCC36-like OS=Mus musculus OX=10090 GN=C6.1al PE=2 SV=1
3143700	3535900	1480900	5551500	4167200	2939000	4935500	0.978342	-0.693251	C8a	sp|Q8K182|CO8A_MOUSE Complement component C8 alpha chain OS=Mus musculus OX=10090 GN=C8a PE=1 SV=1
10019000	73215000	174660	55891000	38127000	18415000	23972000	0.106879	-0.29459	C8b	sp|Q8BH35|CO8B_MOUSE Complement component C8 beta chain OS=Mus musculus OX=10090 GN=C8b PE=1 SV=1
8099600	174660	174660	9361700	7773800	8512900	8678500	1.3006	-1.60746	C8g	sp|Q8VCG4|CO8G_MOUSE Complement component C8 gamma chain OS=Mus musculus OX=10090 GN=C8g PE=1 SV=1
8899400	9723600	17041000	9238100	9326600	10757000	34349000	0.208677	-0.421124	CA122	sp|B1ARW8|CA122_MOUSE Uncharacterized protein C1orf122 homolog OS=Mus musculus OX=10090 PE=4 SV=1
63711000	52976000	52676000	30633000	67707000	40554000	35376000	0.576294	0.373832	Ca2	sp|P00920|CAH2_MOUSE Carbonic anhydrase 2 OS=Mus musculus OX=10090 GN=Ca2 PE=1 SV=4
268200000	497380000	167230000	104220000	152840000	113200000	56269000	1.21187	1.54398	Ca3	sp|P16015|CAH3_MOUSE Carbonic anhydrase 3 OS=Mus musculus OX=10090 GN=Ca3 PE=1 SV=3
28484000	38476000	30948000	26911000	34693000	26124000	26130000	0.538368	0.1973	Ca5b	sp|Q9QZA0|CAH5B_MOUSE Carbonic anhydrase 5B, mitochondrial OS=Mus musculus OX=10090 GN=Ca5b PE=1 SV=2
19036000	18498000	6443400	12180000	9615700	6063300	6738200	0.753139	0.761145	Caap1	sp|Q8VDY9|CAAP1_MOUSE Caspase activity and apoptosis inhibitor 1 OS=Mus musculus OX=10090 GN=Caap1 PE=1 SV=2
41588000	22150000	37207000	28249000	38197000	41534000	41224000	0.237862	-0.148679	Cab39	sp|Q06138|CAB39_MOUSE Calcium-binding protein 39 OS=Mus musculus OX=10090 GN=Cab39 PE=1 SV=2
174660	174660	174660	174660	1629700	5335300	15973000	0.616641	-5.04799	Cabyr	sp|Q9D424|CABYR_MOUSE Calcium-binding tyrosine phosphorylation-regulated protein OS=Mus musculus OX=10090 GN=Cabyr PE=1 SV=1
174660	174660	174660	174660	12173000	174660	174660	0.359928	-4.18379	Cacna1e	sp|Q61290|CAC1E_MOUSE Voltage-dependent R-type calcium channel subunit alpha-1E OS=Mus musculus OX=10090 GN=Cacna1e PE=1 SV=1
3255700	16827000	4526800	4413000	1931900	2638100	6984600	0.488385	1.03911	Cacna2d1	sp|O08532|CA2D1_MOUSE Voltage-dependent calcium channel subunit alpha-2/delta-1 OS=Mus musculus OX=10090 GN=Cacna2d1 PE=1 SV=1
9689000	9340500	6946700	8994200	6509400	5938500	9336500	0.323831	0.1703	Cactin	sp|Q9CS00|CATIN_MOUSE Cactin OS=Mus musculus OX=10090 GN=Cactin PE=1 SV=2
174660	174660	174660	174660	174660	174660	174660	#DIV/0!	0	Cacul1	sp|Q8R0X2|CACL1_MOUSE CDK2-associated and cullin domain-containing protein 1 OS=Mus musculus OX=10090 GN=Cacul1 PE=2 SV=1
264760000	226920000	242420000	203880000	235650000	265810000	206850000	0.365621	0.10168	Cacybp	sp|Q9CXW3|CYBP_MOUSE Calcyclin-binding protein OS=Mus musculus OX=10090 GN=Cacybp PE=1 SV=1
74930000	72094000	83641000	71157000	79731000	84302000	100160000	0.385328	-0.124831	Cad	sp|B2RQC6|PYR1_MOUSE CAD protein OS=Mus musculus OX=10090 GN=Cad PE=1 SV=1
49185000	95343000	59817000	53409000	80940000	52506000	70935000	0.0928554	0.0798481	Cadm1	sp|Q8R5M8|CADM1_MOUSE Cell adhesion molecule 1 OS=Mus musculus OX=10090 GN=Cadm1 PE=1 SV=2
174660	174660	174660	3776000	3388900	3210500	5927100	2.47697	-4.5444	Cage1	sp|Q5IR70|CAGE1_MOUSE Cancer-associated gene 1 protein homolog OS=Mus musculus OX=10090 GN=Cage1 PE=1 SV=2
50467000	36818000	44281000	42668000	38386000	48051000	37379000	0.199585	0.0754407	Calcoco1	sp|Q8CGU1|CACO1_MOUSE Calcium-binding and coiled-coil domain-containing protein 1 OS=Mus musculus OX=10090 GN=Calcoco1 PE=1 SV=2
170600000	229540000	191540000	143460000	132010000	136400000	158310000	1.72776	0.468437	Cald1	tr|E9QA15|E9QA15_MOUSE Caldesmon 1 OS=Mus musculus OX=10090 GN=Cald1 PE=1 SV=1
1440500000	1409300000	1724000000	2055900000	1772300000	1629100000	1828900000	1.10806	-0.256736	Calml3	sp|P0DP28|CALM3_MOUSE Calmodulin-3 OS=Mus musculus OX=10090 GN=Calm3 PE=1 SV=1;sp|P0DP27|CALM2_MOUSE Calmodulin-2 OS=Mus musculus OX=10090 GN=Calm2 PE=1 SV=1;sp|P0DP26|CALM1_MOUSE Calmodulin-1 OS=Mus musculus OX=10090 GN=Calm1 PE=1 SV=1;sp|Q9D6P8|CALL3_MOU
790540000	784810000	690280000	727680000	765500000	816330000	881010000	0.381644	-0.0788418	Calr	sp|P14211|CALR_MOUSE Calreticulin OS=Mus musculus OX=10090 GN=Calr PE=1 SV=1
174660	174660	174660	174660	174660	174660	174660	#DIV/0!	0	Calr3	sp|Q9D9Q6|CALR3_MOUSE Calreticulin-3 OS=Mus musculus OX=10090 GN=Calr3 PE=1 SV=2
21735000	18044000	11069000	19283000	31774000	25515000	15438000	0.554638	-0.440562	Calr4	tr|Q3TQS0|Q3TQS0_MOUSE Calreticulin OS=Mus musculus OX=10090 GN=Calr4 PE=1 SV=1
245110000	317720000	339640000	334480000	290750000	269780000	224340000	0.231781	0.104327	Calu	sp|O35887|CALU_MOUSE Calumenin OS=Mus musculus OX=10090 GN=Calu PE=1 SV=1
15628000	16428000	8613200	13136000	12531000	13838000	15829000	0.0426284	-0.0291921	Camk2d	sp|Q6PHZ2|KCC2D_MOUSE Calcium/calmodulin-dependent protein kinase type II subunit delta OS=Mus musculus OX=10090 GN=Camk2d PE=1 SV=1
32821000	31434000	28348000	23614000	31092000	26672000	29428000	0.666814	0.156132	Camk2g;Camk2b	sp|Q923T9|KCC2G_MOUSE Calcium/calmodulin-dependent protein kinase type II subunit gamma OS=Mus musculus OX=10090 GN=Camk2g PE=1 SV=1;sp|P28652|KCC2B_MOUSE Calcium/calmodulin-dependent protein kinase type II subunit beta OS=Mus musculus OX=10090 GN=Camk2b P
7760800	6835900	5618700	6252300	11117000	2849500	8927100	0.0910691	-0.112801	Camkk2	sp|Q8C078|KKCC2_MOUSE Calcium/calmodulin-dependent protein kinase kinase 2 OS=Mus musculus OX=10090 GN=Camkk2 PE=1 SV=2
17948000	14336000	16379000	20744000	21150000	16468000	19648000	1.07215	-0.265796	Camlg	sp|P49070|CAMLG_MOUSE Calcium signal-modulating cyclophilin ligand OS=Mus musculus OX=10090 GN=Camlg PE=1 SV=2
47354000	53891000	45406000	40226000	38673000	35439000	39679000	2.0557	0.344335	Camsap1	sp|A2AHC3|CAMP1_MOUSE Calmodulin-regulated spectrin-associated protein 1 OS=Mus musculus OX=10090 GN=Camsap1 PE=1 SV=1
20268000	25107000	22109000	24125000	25424000	14999000	15880000	0.287088	0.161885	Camsap3	sp|Q80VC9|CAMP3_MOUSE Calmodulin-regulated spectrin-associated protein 3 OS=Mus musculus OX=10090 GN=Camsap3 PE=1 SV=1
420480000	298900000	357850000	350680000	441210000	476750000	448530000	0.77294	-0.257669	Cand1	sp|Q6ZQ38|CAND1_MOUSE Cullin-associated NEDD8-dissociated protein 1 OS=Mus musculus OX=10090 GN=Cand1 PE=1 SV=2
12739000	9913600	13330000	14280000	13690000	17593000	18268000	1.23114	-0.41192	Cand2	sp|Q6ZQ73|CAND2_MOUSE Cullin-associated NEDD8-dissociated protein 2 OS=Mus musculus OX=10090 GN=Cand2 PE=1 SV=2
298490000	261100000	288050000	329180000	345680000	398670000	350880000	1.84664	-0.333803	Canx	sp|P35564|CALX_MOUSE Calnexin OS=Mus musculus OX=10090 GN=Canx PE=1 SV=1
502060000	433610000	474420000	508490000	479550000	505980000	505240000	0.775206	-0.0886414	Cap1	sp|P40124|CAP1_MOUSE Adenylyl cyclase-associated protein 1 OS=Mus musculus OX=10090 GN=Cap1 PE=1 SV=4
26530000	48281000	25245000	34583000	24403000	21734000	28332000	0.368	0.290829	Capg	sp|P24452|CAPG_MOUSE Macrophage-capping protein OS=Mus musculus OX=10090 GN=Capg PE=1 SV=2
26523000	29554000	29997000	20358000	20215000	31727000	24486000	0.631033	0.245817	Capn1	sp|O35350|CAN1_MOUSE Calpain-1 catalytic subunit OS=Mus musculus OX=10090 GN=Capn1 PE=1 SV=1
1679200	174660	1708700	5054800	4783800	9749100	22354000	0.936883	-3.14236	Capn11	sp|Q6J756|CAN11_MOUSE Calpain-11 OS=Mus musculus OX=10090 GN=Capn11 PE=1 SV=1
19268000	21109000	17683000	14731000	14319000	16233000	17865000	1.43274	0.293845	Capn2	sp|O08529|CAN2_MOUSE Calpain-2 catalytic subunit OS=Mus musculus OX=10090 GN=Capn2 PE=1 SV=4
22988000	20051000	22053000	11721000	16635000	24152000	17881000	0.611201	0.302168	Capn6	sp|O35646|CAN6_MOUSE Calpain-6 OS=Mus musculus OX=10090 GN=Capn6 PE=1 SV=2
19535000	23914000	25829000	23790000	21646000	28162000	29645000	0.443389	-0.160537	Capns1	sp|O88456|CPNS1_MOUSE Calpain small subunit 1 OS=Mus musculus OX=10090 GN=Capns1 PE=1 SV=1
110930000	105620000	105840000	112900000	105140000	99726000	119690000	0.131831	-0.0252934	Caprin1	sp|Q60865|CAPR1_MOUSE Caprin-1 OS=Mus musculus OX=10090 GN=Caprin1 PE=1 SV=2
17407000	14750000	15595000	18408000	13738000	13783000	8782500	0.401718	0.218755	Caprin2	sp|Q05A80|CAPR2_MOUSE Caprin-2 OS=Mus musculus OX=10090 GN=Caprin2 PE=1 SV=1
165840000	167840000	161440000	171380000	139950000	190860000	143430000	0.0912603	0.0321305	Capza1	sp|P47753|CAZA1_MOUSE F-actin-capping protein subunit alpha-1 OS=Mus musculus OX=10090 GN=Capza1 PE=1 SV=4
239890000	290980000	232740000	228510000	227250000	224670000	182720000	0.948401	0.238262	Capza2	sp|P47754|CAZA2_MOUSE F-actin-capping protein subunit alpha-2 OS=Mus musculus OX=10090 GN=Capza2 PE=1 SV=3
124100000	131710000	135020000	135820000	130890000	125850000	158000000	0.355251	-0.0793211	Capzb	sp|P47757|CAPZB_MOUSE F-actin-capping protein subunit beta OS=Mus musculus OX=10090 GN=Capzb PE=1 SV=3
68783000	91582000	79141000	74149000	65380000	62333000	82007000	0.526778	0.169874	Carhsp1	sp|Q9CR86|CHSP1_MOUSE Calcium-regulated heat stable protein 1 OS=Mus musculus OX=10090 GN=Carhsp1 PE=1 SV=1
99635000	79359000	73198000	77335000	81184000	99194000	71574000	0.0631259	0.0302145	Carkd	sp|Q9CZ42|NNRD_MOUSE ATP-dependent (S)-NAD(P)H-hydrate dehydratase OS=Mus musculus OX=10090 GN=Naxd PE=1 SV=1
15481000	15093000	21017000	22234000	17708000	9241700	14073000	0.1433	0.120939	Carm1	sp|Q9WVG6|CARM1_MOUSE Histone-arginine methyltransferase CARM1 OS=Mus musculus OX=10090 GN=Carm1 PE=1 SV=2
37673000	30613000	38800000	41834000	44106000	45677000	50168000	1.65001	-0.348426	Cars	sp|Q9ER72|SYCC_MOUSE Cysteine--tRNA ligase, cytoplasmic OS=Mus musculus OX=10090 GN=Cars1 PE=1 SV=2
4158000	17462000	23583000	3561300	7969000	5654800	13490000	0.636898	0.974388	Cars2	sp|Q8BYM8|SYCM_MOUSE Probable cysteine--tRNA ligase, mitochondrial OS=Mus musculus OX=10090 GN=Cars2 PE=1 SV=2
22910000	28388000	17324000	35421000	27421000	29112000	27275000	0.979444	-0.381955	Casc3	sp|Q8K3W3|CASC3_MOUSE Protein CASC3 OS=Mus musculus OX=10090 GN=Casc3 PE=1 SV=3
14703000	10183000	17862000	20267000	19504000	15211000	24259000	0.953671	-0.475353	Casc4	sp|Q6P2L7|GOLM2_MOUSE Protein GOLM2 OS=Mus musculus OX=10090 GN=Golm2 PE=1 SV=1
7098600	7312600	5795200	7770400	7262600	5572900	5019700	0.141316	0.072264	Casc5	sp|Q66JQ7|KNL1_MOUSE Kinetochore scaffold 1 OS=Mus musculus OX=10090 GN=Knl1 PE=1 SV=3
9803700	12475000	9583300	11311000	174660	10541000	21485000	0.0165891	-0.0345277	Cask	sp|O70589|CSKP_MOUSE Peripheral plasma membrane protein CASK OS=Mus musculus OX=10090 GN=Cask PE=1 SV=2
13180000	12755000	13356000	11520000	9714300	7830000	13825000	0.746491	0.288619	Caskin1	sp|Q6P9K8|CSKI1_MOUSE Caskin-1 OS=Mus musculus OX=10090 GN=Caskin1 PE=1 SV=2
12566000	3804900	4530000	3852300	6590500	5176300	174660	0.469458	0.819248	Casp2	sp|P29594|CASP2_MOUSE Caspase-2 OS=Mus musculus OX=10090 GN=Casp2 PE=1 SV=5
15949000	20416000	18838000	13853000	9415800	12745000	9370500	2.00351	0.697591	Casp3	sp|P70677|CASP3_MOUSE Caspase-3 OS=Mus musculus OX=10090 GN=Casp3 PE=1 SV=1
14353000	14975000	14217000	9337600	13094000	15967000	17836000	0.0737601	0.0460865	Casp6	sp|O08738|CASP6_MOUSE Caspase-6 OS=Mus musculus OX=10090 GN=Casp6 PE=1 SV=1
6437800	8274400	7859700	4645600	4605000	5742500	6507800	1.52117	0.485168	Casp7	sp|P97864|CASP7_MOUSE Caspase-7 OS=Mus musculus OX=10090 GN=Casp7 PE=1 SV=2
6731200	9059900	6414700	5825100	9346100	4235800	7359500	0.187941	0.145546	Casp8	sp|O89110|CASP8_MOUSE Caspase-8 OS=Mus musculus OX=10090 GN=Casp8 PE=1 SV=1
10752000	6204800	7812300	4840000	5629800	6480500	10854000	0.274836	0.248271	Casp9	sp|Q8C3Q9|CASP9_MOUSE Caspase-9 OS=Mus musculus OX=10090 GN=Casp9 PE=1 SV=1
31456000	43224000	27743000	52659000	27862000	22118000	28581000	0.052204	0.0575896	Cast	sp|P51125|ICAL_MOUSE Calpastatin OS=Mus musculus OX=10090 GN=Cast PE=1 SV=2
43402000	42678000	51424000	39990000	45938000	38192000	47824000	0.332682	0.0925723	Cat	sp|P24270|CATA_MOUSE Catalase OS=Mus musculus OX=10090 GN=Cat PE=1 SV=4
7167500	174660	1903600	7903200	11910000	17225000	18524000	1.6112	-2.1722	Catsperb	sp|A2RTF1|CTSRB_MOUSE Cation channel sperm-associated protein subunit beta OS=Mus musculus OX=10090 GN=Catsperb PE=1 SV=1
174660	174660	174660	174660	3985600	174660	4225000	0.691512	-3.61498	Catsperd	sp|E9Q9F6|CTSRD_MOUSE Cation channel sperm-associated protein subunit delta OS=Mus musculus OX=10090 GN=Catsperd PE=1 SV=1
174660	174660	174660	1822400	20549000	16392000	26433000	1.31511	-6.5441	Catspere	sp|P0DP43|CTSRE_MOUSE Cation channel sperm-associated protein subunit epsilon OS=Mus musculus OX=10090 GN=Catspere PE=1 SV=1
5337900	174660	1681100	5022600	4963400	6058100	9962400	1.08208	-1.43904	Catsperg2;Catsperg1	sp|C6KI89|CTSG2_MOUSE Cation channel sperm-associated protein subunit gamma 2 OS=Mus musculus OX=10090 GN=Catsperg2 PE=1 SV=1;sp|E9Q355|CTSG1_MOUSE Cation channel sperm-associated protein subunit gamma 1 OS=Mus musculus OX=10090 GN=Catsperg1 PE=2 SV=1
96351000	119100000	118330000	71631000	80858000	71078000	63995000	2.48749	0.630066	Cav1	sp|P49817|CAV1_MOUSE Caveolin-1 OS=Mus musculus OX=10090 GN=Cav1 PE=1 SV=1
8697500	17069000	8666200	8308100	6420800	10866000	9462000	0.464959	0.389118	Cav2	sp|Q9WVC3|CAV2_MOUSE Caveolin-2 OS=Mus musculus OX=10090 GN=Cav2 PE=1 SV=1
17391000	20202000	26721000	13647000	15855000	18881000	19724000	0.740951	0.332367	Cbfb	sp|Q08024|PEBB_MOUSE Core-binding factor subunit beta OS=Mus musculus OX=10090 GN=Cbfb PE=1 SV=1
28824000	15806000	27177000	22372000	27698000	27745000	30758000	0.338393	-0.181431	Cbl	sp|P22682|CBL_MOUSE E3 ubiquitin-protein ligase CBL OS=Mus musculus OX=10090 GN=Cbl PE=1 SV=3
3012100	3526800	4974100	2473700	174660	7316800	4272900	0.0523914	0.108549	Cblb	sp|Q3TTA7|CBLB_MOUSE E3 ubiquitin-protein ligase CBL-B OS=Mus musculus OX=10090 GN=Cblb PE=1 SV=3
3803600	3789500	9821400	5170600	4608600	8770100	9640100	0.218654	-0.279826	Cbll1	sp|Q9JIY2|HAKAI_MOUSE E3 ubiquitin-protein ligase Hakai OS=Mus musculus OX=10090 GN=Cbll1 PE=1 SV=1
93993000	82370000	87732000	76970000	73762000	75331000	93373000	0.626503	0.140568	Cbr1	sp|P48758|CBR1_MOUSE Carbonyl reductase [NADPH] 1 OS=Mus musculus OX=10090 GN=Cbr1 PE=1 SV=3
21050000	31148000	19944000	30716000	36919000	34353000	29687000	1.25356	-0.453033	Cbr2	sp|P08074|CBR2_MOUSE Carbonyl reductase [NADPH] 2 OS=Mus musculus OX=10090 GN=Cbr2 PE=1 SV=1
6711800	10389000	4880900	9201100	5591700	6930300	11037000	0.167868	-0.160599	Cbr3	sp|Q8K354|CBR3_MOUSE Carbonyl reductase [NADPH] 3 OS=Mus musculus OX=10090 GN=Cbr3 PE=1 SV=1
44027000	34264000	39215000	36875000	38433000	31233000	29118000	0.705025	0.207787	Cbr4	sp|Q91VT4|CBR4_MOUSE Carbonyl reductase family member 4 OS=Mus musculus OX=10090 GN=Cbr4 PE=1 SV=2
61904000	48850000	55000000	46860000	64063000	52863000	48067000	0.154752	0.0610176	Cbwd1	sp|Q8VEH6|CBWD1_MOUSE COBW domain-containing protein 1 OS=Mus musculus OX=10090 GN=Cbwd1 PE=1 SV=1
82293000	72247000	87722000	100910000	71399000	72428000	69120000	0.0850562	0.0414982	Cbx1	sp|P83917|CBX1_MOUSE Chromobox protein homolog 1 OS=Mus musculus OX=10090 GN=Cbx1 PE=1 SV=1
107140000	205760000	148460000	140380000	127690000	106340000	85973000	0.651986	0.418096	Cbx3	sp|P23198|CBX3_MOUSE Chromobox protein homolog 3 OS=Mus musculus OX=10090 GN=Cbx3 PE=1 SV=2
79980000	107570000	80307000	58009000	82356000	61595000	78385000	0.899472	0.349297	Cbx5	sp|Q61686|CBX5_MOUSE Chromobox protein homolog 5 OS=Mus musculus OX=10090 GN=Cbx5 PE=1 SV=1
174660	174660	174660	174660	8918200	5754700	11247000	1.12294	-5.22306	Cby1	sp|Q9D1C2|CBY1_MOUSE Protein chibby homolog 1 OS=Mus musculus OX=10090 GN=Cby1 PE=1 SV=1
17619000	9970000	15253000	13563000	7175600	13809000	15404000	0.252766	0.193532	Cc2d1a	sp|Q8K1A6|C2D1A_MOUSE Coiled-coil and C2 domain-containing protein 1A OS=Mus musculus OX=10090 GN=Cc2d1a PE=1 SV=2
20051000	21845000	18430000	20763000	21860000	20013000	17111000	0.0406262	0.0123872	Cc2d1b	sp|Q8BRN9|C2D1B_MOUSE Coiled-coil and C2 domain-containing protein 1B OS=Mus musculus OX=10090 GN=Cc2d1b PE=1 SV=1
18605000	18701000	14285000	13602000	174660	12462000	9272000	1.09592	0.953905	Cc2d2b	tr|A0A286YDU8|A0A286YDU8_MOUSE Coiled-coil and C2 domain-containing 2B OS=Mus musculus OX=10090 GN=Cc2d2b PE=1 SV=1
62544000	51956000	56226000	59415000	62399000	57303000	68815000	0.597458	-0.123224	Ccar1	sp|Q8CH18|CCAR1_MOUSE Cell division cycle and apoptosis regulator protein 1 OS=Mus musculus OX=10090 GN=Ccar1 PE=1 SV=1
108080000	95686000	100360000	135890000	123320000	124820000	144250000	2.2607	-0.381596	Ccar2	sp|Q8VDP4|CCAR2_MOUSE Cell cycle and apoptosis regulator protein 2 OS=Mus musculus OX=10090 GN=Ccar2 PE=1 SV=2
21104000	13205000	14262000	22176000	26387000	25844000	17196000	1.02671	-0.500262	Ccbl1	sp|Q8BTY1|KAT1_MOUSE Kynurenine--oxoglutarate transaminase 1 OS=Mus musculus OX=10090 GN=Kyat1 PE=1 SV=1
39642000	39348000	39447000	32940000	26080000	25018000	25227000	2.54534	0.531326	Ccbl2	sp|Q71RI9|KAT3_MOUSE Kynurenine--oxoglutarate transaminase 3 OS=Mus musculus OX=10090 GN=Kyat3 PE=1 SV=1
5834400	2139700	6551400	7223400	9855900	16226000	24659000	1.0134	-1.58154	Ccdc103	sp|Q9D9P2|CC103_MOUSE Coiled-coil domain-containing protein 103 OS=Mus musculus OX=10090 GN=Ccdc103 PE=1 SV=1
174660	174660	174660	174660	174660	174660	174660	#DIV/0!	0	Ccdc108	sp|Q3V0B4|CFA65_MOUSE Cilia- and flagella-associated protein 65 OS=Mus musculus OX=10090 GN=Cfap65 PE=1 SV=1
49330000	51207000	54683000	29128000	52298000	42140000	19150000	0.905947	0.536205	Ccdc114	sp|Q3UX62|ODAD1_MOUSE Outer dynein arm-docking complex subunit 1 OS=Mus musculus OX=10090 GN=Odad1 PE=2 SV=1
94129000	85454000	63326000	70295000	81745000	75570000	73117000	0.291013	0.106999	Ccdc115	sp|Q8VE99|CC115_MOUSE Coiled-coil domain-containing protein 115 OS=Mus musculus OX=10090 GN=Ccdc115 PE=1 SV=1
38634000	35632000	24554000	24238000	27270000	29112000	30583000	0.605654	0.244717	Ccdc117	sp|Q6PB51|CC117_MOUSE Coiled-coil domain-containing protein 117 OS=Mus musculus OX=10090 GN=Ccdc117 PE=1 SV=1
47604000	52559000	50549000	67467000	59067000	44494000	46496000	0.256772	-0.114343	Ccdc12	sp|Q8R344|CCD12_MOUSE Coiled-coil domain-containing protein 12 OS=Mus musculus OX=10090 GN=Ccdc12 PE=1 SV=2
45893000	38539000	36805000	45346000	40747000	39328000	37271000	0.0287133	-0.00927575	Ccdc124	sp|Q9D8X2|CC124_MOUSE Coiled-coil domain-containing protein 124 OS=Mus musculus OX=10090 GN=Ccdc124 PE=1 SV=1
5919200	5174900	4622700	5222400	6249500	3245300	4069000	0.2624	0.157672	Ccdc127	sp|Q3TC33|CC127_MOUSE Coiled-coil domain-containing protein 127 OS=Mus musculus OX=10090 GN=Ccdc127 PE=1 SV=2
33521000	18090000	23269000	44196000	39467000	45845000	43438000	2.16921	-0.792632	Ccdc13	sp|D3YV10|CCD13_MOUSE Coiled-coil domain-containing protein 13 OS=Mus musculus OX=10090 GN=Ccdc13 PE=1 SV=1
248180000	178020000	208090000	222890000	152610000	119970000	21221000	0.751145	0.710878	Ccdc130	sp|Q9D516|CC130_MOUSE Coiled-coil domain-containing protein 130 OS=Mus musculus OX=10090 GN=Ccdc130 PE=2 SV=1
20276000	22379000	13526000	16225000	14216000	17590000	22204000	0.146722	0.0929297	Ccdc132	sp|Q8CI71|VPS50_MOUSE Syndetin OS=Mus musculus OX=10090 GN=Vps50 PE=1 SV=2
4556100	174660	1700300	6022400	5695700	6899500	10335000	1.56097	-1.75553	Ccdc134	sp|Q8C7V8|CC134_MOUSE Coiled-coil domain-containing protein 134 OS=Mus musculus OX=10090 GN=Ccdc134 PE=1 SV=1
16817000	5134500	19423000	16662000	32057000	37698000	41832000	1.23227	-1.2171	Ccdc136	sp|Q3TVA9|CC136_MOUSE Coiled-coil domain-containing protein 136 OS=Mus musculus OX=10090 GN=Ccdc136 PE=1 SV=2
14285000	9647000	10474000	11689000	11744000	9184500	6026700	0.390922	0.247446	Ccdc146	tr|E9Q9F7|E9Q9F7_MOUSE Coiled-coil domain-containing 146 OS=Mus musculus OX=10090 GN=Ccdc146 PE=1 SV=1
174660	174660	174660	174660	174660	3200800	3022400	0.691516	-3.23383	Ccdc151	sp|Q8BSN3|ODAD3_MOUSE outer dynein arm-docking complex subunit 3 OS=Mus musculus OX=10090 GN=ODAD3 PE=2 SV=2
54057000	38085000	55207000	88900000	40887000	52927000	25553000	0.0624357	-0.0841595	Ccdc155	sp|Q80VJ8|KASH5_MOUSE Protein KASH5 OS=Mus musculus OX=10090 GN=Kash5 PE=1 SV=3
25415000	31476000	36980000	29785000	41745000	44838000	34615000	0.610085	-0.270597	Ccdc158	sp|Q8CDI6|CD158_MOUSE Coiled-coil domain-containing protein 158 OS=Mus musculus OX=10090 GN=Ccdc158 PE=2 SV=1
2726400	21569000	13004000	20104000	8318500	14168000	10832000	0.059205	-0.103258	Ccdc160	sp|Q3UYG1|CC160_MOUSE Coiled-coil domain-containing protein 160 OS=Mus musculus OX=10090 GN=Ccdc160 PE=2 SV=1
174660	174660	174660	4022500	22751000	174660	174660	0.457697	-5.27881	Ccdc167	sp|Q9D162|CC167_MOUSE Coiled-coil domain-containing protein 167 OS=Mus musculus OX=10090 GN=Ccdc167 PE=1 SV=2
4721900	174660	174660	174660	174660	4641600	6534200	0.204139	-0.76934	Ccdc171	sp|E9Q1U1|CC171_MOUSE Coiled-coil domain-containing protein 171 OS=Mus musculus OX=10090 GN=Ccdc171 PE=2 SV=1
5732600	3510700	4576800	5015700	2958500	3916400	2186300	0.550647	0.388476	Ccdc174	sp|Q3U155|CC174_MOUSE Coiled-coil domain-containing protein 174 OS=Mus musculus OX=10090 GN=Ccdc174 PE=2 SV=1
174660	174660	174660	174660	174660	174660	174660	#DIV/0!	0	Ccdc176	sp|Q3V079|BBOF1_MOUSE Basal body-orientation factor 1 OS=Mus musculus OX=10090 GN=Bbof1 PE=2 SV=2
317160000	262500000	239040000	265380000	325190000	292520000	304500000	0.432129	-0.121593	Ccdc18	sp|Q640L5|CCD18_MOUSE Coiled-coil domain-containing protein 18 OS=Mus musculus OX=10090 GN=Ccdc18 PE=1 SV=1
10654000	10974000	174660	4677100	12073000	12223000	6539400	0.164417	-0.288785	Ccdc181	sp|Q80ZU5|CC181_MOUSE Coiled-coil domain-containing protein 181 OS=Mus musculus OX=10090 GN=Ccdc181 PE=1 SV=1
24740000	27979000	18429000	20437000	26318000	24295000	38015000	0.289153	-0.201256	Ccdc186	sp|Q8C9S4|CC186_MOUSE Coiled-coil domain-containing protein 186 OS=Mus musculus OX=10090 GN=Ccdc186 PE=1 SV=2
14320000	12312000	12614000	11120000	11604000	9758000	9573500	1.64348	0.315289	Ccdc22	sp|Q9JIG7|CCD22_MOUSE Coiled-coil domain-containing protein 22 OS=Mus musculus OX=10090 GN=Ccdc22 PE=1 SV=1
26039000	20727000	24413000	14914000	14965000	18448000	14072000	2.25473	0.604966	Ccdc25	sp|Q78PG9|CCD25_MOUSE Coiled-coil domain-containing protein 25 OS=Mus musculus OX=10090 GN=Ccdc25 PE=1 SV=1
174660	174660	174660	3429700	174660	4718400	174660	0.670906	-3.6044	Ccdc36	sp|Q6PDM4|IHO1_MOUSE Interactor of HORMAD1 protein 1 OS=Mus musculus OX=10090 GN=Iho1 PE=1 SV=3
1404300	174660	1477300	174660	6237300	5488100	6141600	0.984426	-2.14646	Ccdc38	sp|Q8CDN8|CCD38_MOUSE Coiled-coil domain-containing protein 38 OS=Mus musculus OX=10090 GN=Ccdc38 PE=2 SV=1
35340000	17788000	34577000	37958000	40566000	57030000	73741000	1.05474	-0.839769	Ccdc39	sp|Q9D5Y1|CCD39_MOUSE Coiled-coil domain-containing protein 39 OS=Mus musculus OX=10090 GN=Ccdc39 PE=1 SV=1
47188000	5863500	41469000	56526000	134750000	122350000	177830000	1.46606	-1.96333	Ccdc40	sp|Q8BI79|CCD40_MOUSE Coiled-coil domain-containing protein 40 OS=Mus musculus OX=10090 GN=Ccdc40 PE=1 SV=1
29097000	65658000	18227000	23239000	174660	21756000	38601000	0.492285	0.846613	Ccdc42	sp|Q5SV66|CCD42_MOUSE Coiled-coil domain-containing protein 42 OS=Mus musculus OX=10090 GN=Ccdc42 PE=2 SV=2
16092000	18365000	15712000	19681000	25541000	17921000	10871000	0.190092	-0.145965	Ccdc43	sp|Q9CR29|CCD43_MOUSE Coiled-coil domain-containing protein 43 OS=Mus musculus OX=10090 GN=Ccdc43 PE=1 SV=1
40758000	35450000	39650000	41137000	26776000	53411000	43240000	0.143035	-0.0912536	Ccdc47	sp|Q9D024|CCD47_MOUSE PAT complex subunit CCDC47 OS=Mus musculus OX=10090 GN=Ccdc47 PE=1 SV=2
12362000	14570000	17394000	16100000	10170000	8222000	8510700	0.7779	0.458763	Ccdc50	sp|Q810U5|CCD50_MOUSE Coiled-coil domain-containing protein 50 OS=Mus musculus OX=10090 GN=Ccdc50 PE=1 SV=1
16407000	14905000	9376800	11910000	12327000	16937000	13755000	0.0256452	-0.0178988	Ccdc53	sp|Q9CR27|WASC3_MOUSE WASH complex subunit 3 OS=Mus musculus OX=10090 GN=Washc3 PE=1 SV=1
21636000	23674000	31423000	42833000	28551000	19749000	35744000	0.422108	-0.310474	Ccdc58	sp|Q8R3Q6|MIX23_MOUSE Protein MIX23 OS=Mus musculus OX=10090 GN=Mix23 PE=1 SV=1
31995000	41508000	35034000	36575000	27756000	27149000	18375000	0.851259	0.397624	Ccdc6	sp|D3YZP9|CCDC6_MOUSE Coiled-coil domain-containing protein 6 OS=Mus musculus OX=10090 GN=Ccdc6 PE=1 SV=1
18407000	11411000	13573000	17570000	27260000	23149000	25389000	1.48771	-0.690495	Ccdc61	sp|Q3UJV1|CCD61_MOUSE Centrosomal protein CCDC61 OS=Mus musculus OX=10090 GN=Ccdc61 PE=1 SV=1
7049200	174660	9239300	11375000	19943000	27847000	40872000	1.27222	-2.18818	Ccdc65	sp|Q8VHI7|DRC2_MOUSE Dynein regulatory complex subunit 2 OS=Mus musculus OX=10090 GN=Ccdc65 PE=1 SV=1
6111500	6294300	7897400	9608600	6744700	2514300	5639700	0.133059	0.143533	Ccdc73	sp|Q8CDM4|CCD73_MOUSE Coiled-coil domain-containing protein 73 OS=Mus musculus OX=10090 GN=Ccdc73 PE=2 SV=2
28990000	16849000	13508000	3357900	174660	174660	16085000	1.25692	1.99928	Ccdc79	sp|Q8C0V1|TERB1_MOUSE Telomere repeats-binding bouquet formation protein 1 OS=Mus musculus OX=10090 GN=Terb1 PE=1 SV=2
13384000	13177000	13068000	10387000	11982000	8591700	5751400	1.28907	0.525338	Ccdc86	sp|Q9JJ89|CCD86_MOUSE Coiled-coil domain-containing protein 86 OS=Mus musculus OX=10090 GN=Ccdc86 PE=1 SV=2
3081600	174660	174660	4279000	174660	174660	9860000	0.375165	-1.66319	Ccdc87	sp|Q8CDL9|CCD87_MOUSE Coiled-coil domain-containing protein 87 OS=Mus musculus OX=10090 GN=Ccdc87 PE=1 SV=2
28447000	17416000	32406000	21770000	23321000	41281000	37036000	0.283822	-0.241886	Ccdc88a	sp|Q5SNZ0|GRDN_MOUSE Girdin OS=Mus musculus OX=10090 GN=Ccdc88a PE=1 SV=2
29509000	38884000	27251000	31533000	32562000	24551000	27660000	0.317327	0.132858	Ccdc88c	sp|Q6VGS5|DAPLE_MOUSE Protein Daple OS=Mus musculus OX=10090 GN=Ccdc88c PE=1 SV=1
8604100	2197300	5497600	8905400	10452000	10503000	14934000	1.33914	-1.0435	Ccdc89	sp|Q9DA73|CCD89_MOUSE Coiled-coil domain-containing protein 89 OS=Mus musculus OX=10090 GN=Ccdc89 PE=1 SV=2
21849000	22081000	15414000	21133000	14101000	23487000	25637000	0.141141	-0.0923852	Ccdc9	sp|Q8VC31|CCDC9_MOUSE Coiled-coil domain-containing protein 9 OS=Mus musculus OX=10090 GN=Ccdc9 PE=1 SV=1
100980000	72878000	70646000	56772000	41089000	58324000	42093000	1.64356	0.717371	Ccdc90b	sp|Q8C3X2|CC90B_MOUSE Coiled-coil domain-containing protein 90B, mitochondrial OS=Mus musculus OX=10090 GN=Ccdc90b PE=1 SV=1
10946000	9688500	7886100	5511300	5310200	5216700	2914700	2.23371	1.00462	Ccdc91	sp|Q9D8L5|CCD91_MOUSE Coiled-coil domain-containing protein 91 OS=Mus musculus OX=10090 GN=Ccdc91 PE=1 SV=2
21591000	174660	29301000	25659000	70320000	33478000	24770000	0.694105	-1.17956	Ccdc92	sp|Q8VDN4|CCD92_MOUSE Coiled-coil domain-containing protein 92 OS=Mus musculus OX=10090 GN=Ccdc92 PE=1 SV=1
24551000	19871000	20573000	15346000	12667000	12377000	15989000	2.24662	0.620208	Ccdc93	sp|Q7TQK5|CCD93_MOUSE Coiled-coil domain-containing protein 93 OS=Mus musculus OX=10090 GN=Ccdc93 PE=1 SV=1
8474100	9661100	9134600	10218000	6024400	4766000	5089500	0.818688	0.478408	Ccdc94	sp|Q9D6J3|YJU2_MOUSE Splicing factor YJU2 OS=Mus musculus OX=10090 GN=Yju2 PE=1 SV=1
174660	174660	174660	174660	174660	2610400	174660	0.359928	-2.16556	Ccdc96	sp|Q9CR92|CCD96_MOUSE Coiled-coil domain-containing protein 96 OS=Mus musculus OX=10090 GN=Ccdc96 PE=2 SV=1
7629700	3219100	174660	5100700	9062300	6572100	6554000	0.729926	-0.89271	Ccdc97	sp|Q9DBT3|CCD97_MOUSE Coiled-coil domain-containing protein 97 OS=Mus musculus OX=10090 GN=Ccdc97 PE=1 SV=1
4330100	7764000	174660	7933100	174660	5839000	5160200	0.092879	-0.224071	Ccm2	sp|Q8K2Y9|CCM2_MOUSE Cerebral cavernous malformations protein 2 homolog OS=Mus musculus OX=10090 GN=Ccm2 PE=1 SV=1
1393600	174660	174660	2679300	2349100	3068000	4498800	1.95113	-2.43826	Ccna1	sp|Q61456|CCNA1_MOUSE Cyclin-A1 OS=Mus musculus OX=10090 GN=Ccna1 PE=1 SV=2
14402000	14099000	174660	174660	7259200	9106900	6886200	0.343387	0.706694	Ccnb1	sp|P24860|CCNB1_MOUSE G2/mitotic-specific cyclin-B1 OS=Mus musculus OX=10090 GN=Ccnb1 PE=1 SV=3
10761000	4408400	174660	174660	6970500	11165000	10153000	0.200635	-0.476378	Ccnb1ip1	sp|D3Z3K2|CIP1_MOUSE E3 ubiquitin-protein ligase CCNB1IP1 OS=Mus musculus OX=10090 GN=Ccnb1ip1 PE=1 SV=1
7977100	3693600	7341500	26012000	31789000	12787000	16127000	1.46606	-1.77432	Ccnb2	sp|P30276|CCNB2_MOUSE G2/mitotic-specific cyclin-B2 OS=Mus musculus OX=10090 GN=Ccnb2 PE=1 SV=2
26206000	10009000	19049000	11930000	21129000	28019000	31096000	0.300134	-0.322982	Ccnh	sp|Q61458|CCNH_MOUSE Cyclin-H OS=Mus musculus OX=10090 GN=Ccnh PE=1 SV=2
30458000	22207000	22479000	22063000	23212000	29671000	27456000	0.0627937	-0.0314766	Ccnk	sp|O88874|CCNK_MOUSE Cyclin-K OS=Mus musculus OX=10090 GN=Ccnk PE=1 SV=3
10765000	4199300	9810700	4752100	6935800	4877500	6805400	0.603772	0.499215	Ccnt1	sp|Q9QWV9|CCNT1_MOUSE Cyclin-T1 OS=Mus musculus OX=10090 GN=Ccnt1 PE=1 SV=3
42938000	96339000	14076000	25186000	25314000	53805000	28382000	0.34964	0.623867	Ccny	sp|Q8BGU5|CCNY_MOUSE Cyclin-Y OS=Mus musculus OX=10090 GN=Ccny PE=1 SV=1
49772000	28478000	33981000	36728000	41683000	52378000	66052000	0.580157	-0.395522	Ccnyl1	tr|D3YUJ3|D3YUJ3_MOUSE Cyclin Y-like 1 OS=Mus musculus OX=10090 GN=Ccnyl1 PE=1 SV=1
18470000	10812000	14933000	13312000	14866000	12180000	12368000	0.328685	0.161059	Ccp110	sp|Q7TSH4|CP110_MOUSE Centriolar coiled-coil protein of 110 kDa OS=Mus musculus OX=10090 GN=Ccp110 PE=1 SV=1
16581000	21234000	21019000	42250000	28584000	25051000	26363000	1.1313	-0.640051	Ccs	sp|Q9WU84|CCS_MOUSE Copper chaperone for superoxide dismutase OS=Mus musculus OX=10090 GN=Ccs PE=1 SV=1
4183400	174660	174660	7099300	5938000	174660	3699900	0.590836	-1.48455	Ccsmst1	sp|Q6RUT7|CSMT1_MOUSE Protein CCSMST1 OS=Mus musculus OX=10090 GN=Ccsmst1 PE=1 SV=1
530900000	419280000	443920000	528120000	625430000	537770000	524580000	1.11644	-0.253521	Cct2	sp|P80314|TCPB_MOUSE T-complex protein 1 subunit beta OS=Mus musculus OX=10090 GN=Cct2 PE=1 SV=4
734130000	583740000	715240000	760230000	868000000	925020000	912190000	1.60857	-0.354313	Cct3	sp|P80318|TCPG_MOUSE T-complex protein 1 subunit gamma OS=Mus musculus OX=10090 GN=Cct3 PE=1 SV=1
533620000	468130000	560120000	662270000	670030000	651590000	589710000	1.94229	-0.305476	Cct4	sp|P80315|TCPD_MOUSE T-complex protein 1 subunit delta OS=Mus musculus OX=10090 GN=Cct4 PE=1 SV=3
700430000	566310000	644300000	735360000	833340000	674840000	637460000	0.64786	-0.177174	Cct5	sp|P80316|TCPE_MOUSE T-complex protein 1 subunit epsilon OS=Mus musculus OX=10090 GN=Cct5 PE=1 SV=1
440180000	366870000	448800000	459120000	499280000	496560000	460910000	1.20134	-0.194298	Cct6a	sp|P80317|TCPZ_MOUSE T-complex protein 1 subunit zeta OS=Mus musculus OX=10090 GN=Cct6a PE=1 SV=3
18908000	3486100	16006000	32138000	43743000	50536000	57609000	2.15587	-1.84569	Cct6b	sp|Q61390|TCPW_MOUSE T-complex protein 1 subunit zeta-2 OS=Mus musculus OX=10090 GN=Cct6b PE=1 SV=4
430620000	308100000	359690000	461000000	435730000	427270000	452870000	1.26987	-0.278884	Cct7	sp|P80313|TCPH_MOUSE T-complex protein 1 subunit eta OS=Mus musculus OX=10090 GN=Cct7 PE=1 SV=1
429960000	367360000	410380000	408990000	483240000	452090000	452280000	0.969157	-0.15797	Cct8	sp|P42932|TCPQ_MOUSE T-complex protein 1 subunit theta OS=Mus musculus OX=10090 GN=Cct8 PE=1 SV=3
6391300	5203500	7597300	11899000	6345800	13780000	14623000	1.16291	-0.866259	Ccz1	sp|Q8C1Y8|CCZ1_MOUSE Vacuolar fusion protein CCZ1 homolog OS=Mus musculus OX=10090 GN=Ccz1 PE=1 SV=1
174660	174660	174660	174660	174660	174660	174660	#DIV/0!	0	Cd109	sp|Q8R422|CD109_MOUSE CD109 antigen OS=Mus musculus OX=10090 GN=Cd109 PE=1 SV=1
14757000	11186000	13257000	10502000	15401000	21439000	12947000	0.283099	-0.206004	Cd151	sp|O35566|CD151_MOUSE CD151 antigen OS=Mus musculus OX=10090 GN=Cd151 PE=1 SV=2
15432000	13079000	19714000	16565000	8098900	10596000	5197100	0.887147	0.668429	Cd200	sp|O54901|OX2G_MOUSE OX-2 membrane glycoprotein OS=Mus musculus OX=10090 GN=Cd200 PE=1 SV=1
60344000	87513000	74359000	61649000	61241000	53956000	59382000	1.09063	0.32682	Cd2ap	sp|Q9JLQ0|CD2AP_MOUSE CD2-associated protein OS=Mus musculus OX=10090 GN=Cd2ap PE=1 SV=3
25283000	26254000	24252000	25294000	29459000	30517000	26775000	0.898058	-0.14898	Cd2bp2	sp|Q9CWK3|CD2B2_MOUSE CD2 antigen cytoplasmic tail-binding protein 2 OS=Mus musculus OX=10090 GN=Cd2bp2 PE=1 SV=1
12597000	18065000	46021000	13929000	14466000	21192000	45534000	0.0501461	0.10418	Cd34	sp|Q64314|CD34_MOUSE Hematopoietic progenitor cell antigen CD34 OS=Mus musculus OX=10090 GN=Cd34 PE=1 SV=1
15680000	20491000	5528000	9300900	4826200	4206900	174660	1.0776	1.58685	Cd36	sp|Q08857|CD36_MOUSE Platelet glycoprotein 4 OS=Mus musculus OX=10090 GN=Cd36 PE=1 SV=2
3716800	6621400	4054900	5222500	174660	5147800	4006400	0.299974	0.399261	Cd3eap	sp|Q76KJ5|RPA34_MOUSE DNA-directed RNA polymerase I subunit RPA34 OS=Mus musculus OX=10090 GN=Polr1g PE=1 SV=2
19511000	17869000	12367000	174660	9336900	11217000	15717000	0.852981	0.863904	Cd47	sp|Q61735|CD47_MOUSE Leukocyte surface antigen CD47 OS=Mus musculus OX=10090 GN=Cd47 PE=1 SV=2
174660	17961000	174660	12174000	10124000	12947000	19397000	0.642747	-1.16232	Cd63	sp|P41731|CD63_MOUSE CD63 antigen OS=Mus musculus OX=10090 GN=Cd63 PE=1 SV=2
174660	174660	4431500	174660	174660	2257700	2959900	0.0479982	0.195416	Cd81	sp|P35762|CD81_MOUSE CD81 antigen OS=Mus musculus OX=10090 GN=Cd81 PE=1 SV=2
8614500	7178000	6556100	7356600	7797700	7054900	7851100	0.0405283	-0.0126374	Cd82	sp|P40237|CD82_MOUSE CD82 antigen OS=Mus musculus OX=10090 GN=Cd82 PE=1 SV=1
12051000	9530200	6205700	4008400	2182500	5925300	16227000	0.216256	0.38644	Cd99	sp|Q8VCN6|CD99_MOUSE CD99 antigen OS=Mus musculus OX=10090 GN=Cd99 PE=1 SV=1
174660	174660	174660	174660	174660	174660	174660	#DIV/0!	0	Cd99l2	sp|Q8BIF0|C99L2_MOUSE CD99 antigen-like protein 2 OS=Mus musculus OX=10090 GN=Cd99l2 PE=1 SV=1
9986000	8950000	6328300	6508700	7477400	10049000	9726800	0.00461826	-0.00325839	Cdan1	sp|Q8CC12|CDAN1_MOUSE Codanin-1 OS=Mus musculus OX=10090 GN=Cdan1 PE=1 SV=2
2453300	2112200	174660	3222600	174660	174660	174660	0.238741	0.754399	Cdc123	sp|Q8CII2|CD123_MOUSE Cell division cycle protein 123 homolog OS=Mus musculus OX=10090 GN=Cdc123 PE=1 SV=2
15858000	13640000	12368000	10198000	12378000	15572000	13344000	0.282798	0.116468	Cdc16	sp|Q8R349|CDC16_MOUSE Cell division cycle protein 16 homolog OS=Mus musculus OX=10090 GN=Cdc16 PE=1 SV=1
10918000	7131100	8511600	9002200	7244400	10133000	10819000	0.126733	-0.0709177	Cdc20	sp|Q9JJ66|CDC20_MOUSE Cell division cycle protein 20 homolog OS=Mus musculus OX=10090 GN=Cdc20 PE=1 SV=2
11477000	13406000	9057300	6330800	11853000	10589000	11183000	0.303142	0.179632	Cdc23	sp|Q8BGZ4|CDC23_MOUSE Cell division cycle protein 23 homolog OS=Mus musculus OX=10090 GN=Cdc23 PE=1 SV=2
24254000	22804000	26702000	23059000	24278000	25542000	24465000	0.0795384	0.0147841	Cdc26	sp|Q99JP4|CDC26_MOUSE Anaphase-promoting complex subunit CDC26 OS=Mus musculus OX=10090 GN=Cdc26 PE=1 SV=1
6833300	4716100	5539100	2244200	4917800	6165200	5072200	0.432364	0.308405	Cdc27	sp|A2A6Q5|CDC27_MOUSE Cell division cycle protein 27 homolog OS=Mus musculus OX=10090 GN=Cdc27 PE=1 SV=1
13068000	13831000	17529000	15223000	12215000	14443000	21049000	0.137898	-0.0872412	Cdc34	sp|Q8CFI2|UB2R1_MOUSE Ubiquitin-conjugating enzyme E2 R1 OS=Mus musculus OX=10090 GN=Cdc34 PE=1 SV=1
100090000	107650000	104280000	114610000	112780000	111310000	122180000	1.66984	-0.147715	Cdc37	sp|Q61081|CDC37_MOUSE Hsp90 co-chaperone Cdc37 OS=Mus musculus OX=10090 GN=Cdc37 PE=1 SV=1
15683000	14766000	12724000	12808000	18162000	13841000	14038000	0.0722923	-0.0318511	Cdc37l1	sp|Q9CZP7|CD37L_MOUSE Hsp90 co-chaperone Cdc37-like 1 OS=Mus musculus OX=10090 GN=Cdc37l1 PE=1 SV=1
26833000	23093000	19103000	20000000	20388000	19039000	15499000	0.920246	0.296774	Cdc40	sp|Q9DC48|PRP17_MOUSE Pre-mRNA-processing factor 17 OS=Mus musculus OX=10090 GN=Cdc40 PE=2 SV=1
232420000	147120000	200100000	136650000	176220000	140850000	149440000	0.891482	0.357654	Cdc42	sp|P60766|CDC42_MOUSE Cell division control protein 42 homolog OS=Mus musculus OX=10090 GN=Cdc42 PE=1 SV=2
54079000	58766000	44161000	54434000	46434000	50963000	50428000	0.165475	0.0496533	Cdc42bpb	sp|Q7TT50|MRCKB_MOUSE Serine/threonine-protein kinase MRCK beta OS=Mus musculus OX=10090 GN=Cdc42bpb PE=1 SV=2
174660	3550500	174660	6308100	174660	6316900	174660	0.360222	-1.31914	Cdc42ep3	sp|Q9CQC5|BORG2_MOUSE Cdc42 effector protein 3 OS=Mus musculus OX=10090 GN=Cdc42ep3 PE=1 SV=1
62958000	50455000	47468000	39005000	41748000	36450000	51754000	1.00812	0.344375	Cdc42ep4	sp|Q9JM96|BORG4_MOUSE Cdc42 effector protein 4 OS=Mus musculus OX=10090 GN=Cdc42ep4 PE=1 SV=1
7308900	7236800	9381200	4925900	6147900	7874400	6719500	0.806826	0.313717	Cdc42ep5	sp|Q9Z0X0|BORG3_MOUSE Cdc42 effector protein 5 OS=Mus musculus OX=10090 GN=Cdc42ep5 PE=1 SV=2
174660	174660	174660	174660	174660	174660	174660	#DIV/0!	0	Cdc42se1	sp|Q8BHL7|C42S1_MOUSE CDC42 small effector protein 1 OS=Mus musculus OX=10090 GN=Cdc42se1 PE=1 SV=1
12039000	18734000	18325000	22786000	16424000	15180000	24262000	0.450046	-0.264782	Cdc42se2	sp|Q8BGH7|C42S2_MOUSE CDC42 small effector protein 2 OS=Mus musculus OX=10090 GN=Cdc42se2 PE=1 SV=1
148620000	138530000	147910000	132380000	145940000	147790000	178010000	0.200878	-0.0585833	Cdc5l	sp|Q6A068|CDC5L_MOUSE Cell division cycle 5-like protein OS=Mus musculus OX=10090 GN=Cdc5l PE=1 SV=2;tr|A0A1W2P7S8|A0A1W2P7S8_MOUSE Predicted gene, 32717 OS=Mus musculus OX=10090 GN=Gm32717 PE=1 SV=1;tr|A0A1W2P7Z8|A0A1W2P7Z8_MOUSE Predicted gene 9045 OS=Mu
28628000	26820000	28909000	23162000	24300000	27086000	33788000	0.134781	0.0541045	Cdc73	sp|Q8JZM7|CDC73_MOUSE Parafibromin OS=Mus musculus OX=10090 GN=Cdc73 PE=1 SV=1
20795000	9413600	9925300	11194000	8523600	9697100	12551000	0.378462	0.350648	Cdca3	sp|Q99M54|CDCA3_MOUSE Cell division cycle-associated protein 3 OS=Mus musculus OX=10090 GN=Cdca3 PE=1 SV=2
8645600	4222500	4152200	9166500	8810900	10309000	17579000	1.05525	-1.01511	Cdca8	sp|Q8BHX3|BOREA_MOUSE Borealin OS=Mus musculus OX=10090 GN=Cdca8 PE=1 SV=2
2344800	6092500	174660	1024800	174660	174660	4489900	0.309223	0.969489	Cdh13	sp|Q9WTR5|CAD13_MOUSE Cadherin-13 OS=Mus musculus OX=10090 GN=Cdh13 PE=1 SV=2
83122000	79406000	100580000	60689000	59076000	59026000	67168000	2.16476	0.512275	Cdh2	sp|P15116|CADH2_MOUSE Cadherin-2 OS=Mus musculus OX=10090 GN=Cdh2 PE=1 SV=2
5316400	4523500	174660	2892700	4737600	174660	174660	0.29518	0.742745	Cdh23	sp|Q99PF4|CAD23_MOUSE Cadherin-23 OS=Mus musculus OX=10090 GN=Cdh23 PE=1 SV=2
7554600	10081000	7951900	4953100	4715100	3015800	174660	1.82788	1.40774	Cdh5	sp|P55284|CADH5_MOUSE Cadherin-5 OS=Mus musculus OX=10090 GN=Cdh5 PE=1 SV=2
174660	174660	174660	174660	174660	174660	174660	#DIV/0!	0	Cdip1	sp|Q9DB75|CDIP1_MOUSE Cell death-inducing p53-target protein 1 OS=Mus musculus OX=10090 GN=Cdip1 PE=2 SV=1
20625000	174660	24728000	10867000	174660	18072000	38893000	0.0551362	-0.163895	Cdipt	sp|Q8VDP6|CDIPT_MOUSE CDP-diacylglycerol--inositol 3-phosphatidyltransferase OS=Mus musculus OX=10090 GN=Cdipt PE=1 SV=1
68861000	72422000	67837000	87949000	84122000	82229000	87105000	3.31072	-0.292116	Cdk1	sp|P11440|CDK1_MOUSE Cyclin-dependent kinase 1 OS=Mus musculus OX=10090 GN=Cdk1 PE=1 SV=3
15140000	174660	174660	174660	174660	4606200	8517800	0.140273	0.616206	Cdk10	sp|Q3UMM4|CDK10_MOUSE Cyclin-dependent kinase 10 OS=Mus musculus OX=10090 GN=Cdk10 PE=1 SV=1
39148000	41098000	36724000	33390000	42923000	40651000	40006000	0.032613	-0.0093128	Cdk11b	sp|P24788|CD11B_MOUSE Cyclin-dependent kinase 11B OS=Mus musculus OX=10090 GN=Cdk11b PE=1 SV=2
25809000	20200000	23367000	24176000	22502000	20689000	20308000	0.288777	0.0773086	Cdk12	sp|Q14AX6|CDK12_MOUSE Cyclin-dependent kinase 12 OS=Mus musculus OX=10090 GN=Cdk12 PE=1 SV=2
13155000	14400000	15211000	16680000	17653000	15736000	14309000	0.922985	-0.175066	Cdk13	sp|Q69ZA1|CDK13_MOUSE Cyclin-dependent kinase 13 OS=Mus musculus OX=10090 GN=Cdk13 PE=1 SV=3
4173800	11239000	7019500	3556400	2905300	3834600	4473100	1.07502	1.018	Cdk16;Cdk18	sp|Q04735|CDK16_MOUSE Cyclin-dependent kinase 16 OS=Mus musculus OX=10090 GN=Cdk16 PE=1 SV=1;sp|Q04899|CDK18_MOUSE Cyclin-dependent kinase 18 OS=Mus musculus OX=10090 GN=Cdk18 PE=1 SV=1
174660	174660	1316900	174660	174660	1861700	4294800	0.385588	-1.55011	Cdk17	sp|Q8K0D0|CDK17_MOUSE Cyclin-dependent kinase 17 OS=Mus musculus OX=10090 GN=Cdk17 PE=1 SV=2
194980000	149510000	142180000	159110000	167520000	177340000	168810000	0.156385	-0.0521535	Cdk2	sp|P97377|CDK2_MOUSE Cyclin-dependent kinase 2 OS=Mus musculus OX=10090 GN=Cdk2 PE=1 SV=2
174660	174660	174660	174660	2616500	174660	174660	0.359928	-2.16836	Cdk20	sp|Q9JHU3|CDK20_MOUSE Cyclin-dependent kinase 20 OS=Mus musculus OX=10090 GN=Cdk20 PE=1 SV=1
5755100	7118600	10440000	7072700	5791300	7465200	8752800	0.136919	0.096089	Cdk4	sp|P30285|CDK4_MOUSE Cyclin-dependent kinase 4 OS=Mus musculus OX=10090 GN=Cdk4 PE=1 SV=1
92836000	98992000	77968000	88471000	85168000	86197000	82984000	0.329199	0.0694552	Cdk5	sp|P49615|CDK5_MOUSE Cyclin-dependent-like kinase 5 OS=Mus musculus OX=10090 GN=Cdk5 PE=1 SV=1
12822000	51020000	40724000	55079000	6955200	59808000	174660	0.0742942	0.192371	Cdk5rap2	sp|Q8K389|CK5P2_MOUSE CDK5 regulatory subunit-associated protein 2 OS=Mus musculus OX=10090 GN=Cdk5rap2 PE=1 SV=3
38088000	22292000	28535000	38168000	36691000	30022000	33823000	0.518368	-0.226473	Cdk5rap3	sp|Q99LM2|CK5P3_MOUSE CDK5 regulatory subunit-associated protein 3 OS=Mus musculus OX=10090 GN=Cdk5rap3 PE=1 SV=1
22343000	17931000	21870000	17761000	22089000	24925000	32553000	0.40671	-0.232202	Cdk7	sp|Q03147|CDK7_MOUSE Cyclin-dependent kinase 7 OS=Mus musculus OX=10090 GN=Cdk7 PE=1 SV=2
13268000	11471000	11219000	9537800	9577200	10429000	13634000	0.408822	0.151054	Cdk9	sp|Q99J95|CDK9_MOUSE Cyclin-dependent kinase 9 OS=Mus musculus OX=10090 GN=Cdk9 PE=1 SV=1
25348000	21233000	16119000	16233000	14630000	12061000	23024000	0.568565	0.342174	Cdkn1b	sp|P46414|CDN1B_MOUSE Cyclin-dependent kinase inhibitor 1B OS=Mus musculus OX=10090 GN=Cdkn1b PE=1 SV=2
65546000	43311000	47047000	56388000	50396000	45472000	34591000	0.270166	0.153838	Cdkn2aip	sp|Q8BI72|CARF_MOUSE CDKN2A-interacting protein OS=Mus musculus OX=10090 GN=Cdkn2aip PE=1 SV=1
9986800	9550700	7781100	10500000	7658400	174660	174660	0.664353	0.976794	Cdkn2aipnl	sp|Q9D211|C2AIL_MOUSE CDKN2AIP N-terminal-like protein OS=Mus musculus OX=10090 GN=Cdkn2aipnl PE=3 SV=1
7688600	174660	174660	174660	174660	174660	4233700	0.248484	1.1716	Cdkn2c	sp|Q60772|CDN2C_MOUSE Cyclin-dependent kinase 4 inhibitor C OS=Mus musculus OX=10090 GN=Cdkn2c PE=1 SV=1
7342700	174660	14535000	10163000	7727100	9031100	9643900	0.198618	-0.314497	Cdkn2d	sp|Q60773|CDN2D_MOUSE Cyclin-dependent kinase 4 inhibitor D OS=Mus musculus OX=10090 GN=Cdkn2d PE=1 SV=2
7342600	7774000	13001000	13714000	17794000	30630000	16806000	1.11165	-1.07432	Cds1	sp|P98191|CDS1_MOUSE Phosphatidate cytidylyltransferase 1 OS=Mus musculus OX=10090 GN=Cds1 PE=1 SV=2
24258000	32876000	23760000	27143000	25678000	30900000	35877000	0.338386	-0.149051	Cds2	sp|Q99L43|CDS2_MOUSE Phosphatidate cytidylyltransferase 2 OS=Mus musculus OX=10090 GN=Cds2 PE=1 SV=1
135130000	136000000	163810000	129340000	142710000	106860000	114860000	0.856579	0.232015	Cdv3	sp|Q4VAA2|CDV3_MOUSE Protein CDV3 OS=Mus musculus OX=10090 GN=Cdv3 PE=1 SV=2
11670000	16634000	18477000	12144000	6272700	8205100	5018800	1.55403	0.979183	Cdyl	sp|Q9WTK2|CDYL_MOUSE Chromodomain Y-like protein OS=Mus musculus OX=10090 GN=Cdyl PE=1 SV=1
174660	174660	11031000	174660	174660	174660	2764800	0.414419	2.20595	Cdyl2	sp|Q9D5D8|CDYL2_MOUSE Chromodomain Y-like protein 2 OS=Mus musculus OX=10090 GN=Cdyl2 PE=1 SV=1
12354000	15078000	15399000	9900500	10073000	11461000	7935500	1.88163	0.536596	Cebpz	sp|P53569|CEBPZ_MOUSE CCAAT/enhancer-binding protein zeta OS=Mus musculus OX=10090 GN=Cebpz PE=1 SV=2
6653800	174660	174660	5950200	8022000	174660	174660	0.158655	-0.617077	Cecr2	sp|E9Q2Z1|CECR2_MOUSE Cat eye syndrome critical region protein 2 homolog OS=Mus musculus OX=10090 GN=Cecr2 PE=1 SV=1
85648000	97878000	96287000	81899000	76913000	83741000	89095000	1.19178	0.169848	Cecr5	sp|Q91WM2|HDHD5_MOUSE Haloacid dehalogenase-like hydrolase domain-containing 5 OS=Mus musculus OX=10090 GN=Hdhd5 PE=1 SV=1
27709000	26368000	27596000	21321000	21965000	22480000	20280000	3.44957	0.339789	Celf1	sp|P28659|CELF1_MOUSE CUGBP Elav-like family member 1 OS=Mus musculus OX=10090 GN=Celf1 PE=1 SV=2
23615000	22782000	17963000	22861000	19912000	20912000	21640000	0.0251295	0.00823332	Celf2	sp|Q9Z0H4|CELF2_MOUSE CUGBP Elav-like family member 2 OS=Mus musculus OX=10090 GN=Celf2 PE=1 SV=1
12299000	13164000	15218000	13929000	10697000	16046000	23225000	0.311798	-0.236356	Cenpa	sp|O35216|CENPA_MOUSE Histone H3-like centromeric protein A OS=Mus musculus OX=10090 GN=Cenpa PE=2 SV=1
22575000	14038000	17178000	19436000	23840000	19667000	12574000	0.0997247	-0.0743991	Cenpc	sp|P49452|CENPC_MOUSE Centromere protein C OS=Mus musculus OX=10090 GN=Cenpc PE=1 SV=2
24539000	11999000	14020000	28681000	23070000	23214000	13672000	0.48187	-0.394932	Cenpe	sp|Q6RT24|CENPE_MOUSE Centromere-associated protein E OS=Mus musculus OX=10090 GN=Cenpe PE=1 SV=1
24037000	35034000	26680000	23676000	29613000	18915000	9565500	0.668793	0.483628	Cenpf	tr|E9Q3P4|E9Q3P4_MOUSE Centromere protein F OS=Mus musculus OX=10090 GN=Cenpf PE=1 SV=1
3802600	174660	174660	174660	5563300	5859200	5326100	0.712692	-1.61212	Cenpo	sp|Q8K015|CENPO_MOUSE Centromere protein O OS=Mus musculus OX=10090 GN=Cenpo PE=2 SV=1
5782500	174660	7264800	5688000	3998600	14981000	7130400	0.462669	-0.850962	Cenpp	sp|Q9CZ92|CENPP_MOUSE Centromere protein P OS=Mus musculus OX=10090 GN=Cenpp PE=2 SV=1
4696300	4526600	5956800	8992500	9111800	10682000	6737300	1.8553	-0.811597	Cenpq	sp|Q9CPQ5|CENPQ_MOUSE Centromere protein Q OS=Mus musculus OX=10090 GN=Cenpq PE=2 SV=2
4530000	6086100	6499400	8508800	14702000	7958800	7569500	0.956878	-0.763449	Cenpu	sp|Q8C4M7|CENPU_MOUSE Centromere protein U OS=Mus musculus OX=10090 GN=Cenpu PE=1 SV=2
190930000	171400000	200420000	147920000	192870000	199800000	237390000	0.110964	-0.0522014	Cenpv	sp|Q9CXS4|CENPV_MOUSE Centromere protein V OS=Mus musculus OX=10090 GN=Cenpv PE=1 SV=2
4891700	1589300	5363000	1323200	9424600	7610600	13745000	0.585662	-1.02353	Cep112	sp|Q5PR68|CE112_MOUSE Centrosomal protein of 112 kDa OS=Mus musculus OX=10090 GN=Cep112 PE=2 SV=2
8278100	40820000	174660	38106000	174660	174660	174660	0.169648	0.766107	Cep120	sp|Q7TSG1|CE120_MOUSE Centrosomal protein of 120 kDa OS=Mus musculus OX=10090 GN=Cep120 PE=1 SV=1
42499000	36567000	42652000	47993000	39034000	45732000	49493000	0.74407	-0.167355	Cep131	sp|Q62036|CP131_MOUSE Centrosomal protein of 131 kDa OS=Mus musculus OX=10090 GN=Cep131 PE=1 SV=2
1718000	174660	174660	174660	174660	12542000	174660	0.287924	-2.24494	Cep135	sp|Q6P5D4|CP135_MOUSE Centrosomal protein of 135 kDa OS=Mus musculus OX=10090 GN=Cep135 PE=1 SV=1
9247300	174660	174660	174660	174660	174660	174660	0.544256	4.19494	Cep162	sp|Q6ZQ06|CE162_MOUSE Centrosomal protein of 162 kDa OS=Mus musculus OX=10090 GN=Cep162 PE=1 SV=2
25473000	33460000	22835000	25767000	21014000	25534000	23305000	0.506287	0.189261	Cep170	sp|Q6A065|CE170_MOUSE Centrosomal protein of 170 kDa OS=Mus musculus OX=10090 GN=Cep170 PE=1 SV=2
13750000	22048000	16353000	15000000	11225000	16318000	20691000	0.199424	0.137032	Cep170b	sp|Q80U49|C170B_MOUSE Centrosomal protein of 170 kDa protein B OS=Mus musculus OX=10090 GN=Cep170b PE=1 SV=2
7943700	7477800	5741700	5627200	11688000	5643300	4254100	0.0424315	0.0523205	Cep290	sp|Q6A078|CE290_MOUSE Centrosomal protein of 290 kDa OS=Mus musculus OX=10090 GN=Cep290 PE=1 SV=2
5015900	174660	3459400	4873200	174660	2619200	174660	0.201747	0.556561	Cep295	sp|Q8BQ48|CE295_MOUSE Centrosomal protein of 295 kDa OS=Mus musculus OX=10090 GN=Cep295 PE=1 SV=3
128370000	103320000	174660	123000000	170440000	108630000	81785000	0.495964	-0.646254	Cep350	sp|E9Q309|CE350_MOUSE Centrosome-associated protein 350 OS=Mus musculus OX=10090 GN=Cep350 PE=1 SV=1
174660	174660	174660	174660	4406700	174660	7480800	0.640071	-4.13054	Cep41	sp|Q99NF3|CEP41_MOUSE Centrosomal protein of 41 kDa OS=Mus musculus OX=10090 GN=Cep41 PE=1 SV=1
37465000	30696000	32872000	32581000	39823000	45158000	47796000	0.86794	-0.295729	Cep55	sp|Q8BT07|CEP55_MOUSE Centrosomal protein of 55 kDa OS=Mus musculus OX=10090 GN=Cep55 PE=1 SV=2
174660	174660	174660	174660	4148800	174660	174660	0.359928	-2.74166	Cep63	sp|Q3UPP8|CEP63_MOUSE Centrosomal protein of 63 kDa OS=Mus musculus OX=10090 GN=Cep63 PE=1 SV=2
174660	6463400	13575000	9407700	5851300	37559000	10685000	0.434924	-1.2365	Cep70	sp|Q6IQY5|CEP70_MOUSE Centrosomal protein of 70 kDa OS=Mus musculus OX=10090 GN=Cep70 PE=2 SV=1
96124000	54267000	64138000	114730000	110870000	122470000	135490000	1.98274	-0.757485	Cep72	sp|Q9D3R3|CEP72_MOUSE Centrosomal protein of 72 kDa OS=Mus musculus OX=10090 GN=Cep72 PE=1 SV=3
8777000	4685800	4452500	5833000	6539100	6449800	10611000	0.333487	-0.3012	Cep78	sp|Q6IRU7|CEP78_MOUSE Centrosomal protein of 78 kDa OS=Mus musculus OX=10090 GN=Cep78 PE=2 SV=1
46482000	36264000	45621000	41222000	56348000	52317000	48750000	0.693892	-0.214823	Cep85	sp|Q8BMK0|CEP85_MOUSE Centrosomal protein of 85 kDa OS=Mus musculus OX=10090 GN=Cep85 PE=1 SV=2
5680600	174660	7624800	8925000	5236800	4077100	5810300	0.278547	-0.420124	Cep97	sp|Q9CZ62|CEP97_MOUSE Centrosomal protein of 97 kDa OS=Mus musculus OX=10090 GN=Cep97 PE=1 SV=1
2952300	174660	174660	174660	1493900	174660	1108100	0.158631	0.576851	Cerk	sp|Q8K4Q7|CERK1_MOUSE Ceramide kinase OS=Mus musculus OX=10090 GN=Cerk PE=1 SV=2
33283000	29613000	41355000	58175000	34191000	41383000	30933000	0.35145	-0.244584	Cers2	sp|Q924Z4|CERS2_MOUSE Ceramide synthase 2 OS=Mus musculus OX=10090 GN=Cers2 PE=1 SV=1
80072000	30290000	41409000	62681000	66334000	107830000	51507000	0.500744	-0.510897	Cers3	sp|Q1A3B0|CERS3_MOUSE Ceramide synthase 3 OS=Mus musculus OX=10090 GN=Cers3 PE=1 SV=1
14723000	10012000	6593900	8748400	20002000	16938000	13267000	0.565274	-0.497092	Cers5	sp|Q9D6K9|CERS5_MOUSE Ceramide synthase 5 OS=Mus musculus OX=10090 GN=Cers5 PE=1 SV=1
2195100	2066300	85753000	965710	3752900	93762000	94787000	0.180869	-0.687335	Ces1b	tr|D3Z5G7|D3Z5G7_MOUSE Carboxylic ester hydrolase OS=Mus musculus OX=10090 GN=Ces1b PE=1 SV=1
229780000	336810000	217480000	243240000	211460000	193670000	186860000	0.712444	0.323846	Ces1c	sp|P23953|EST1C_MOUSE Carboxylesterase 1C OS=Mus musculus OX=10090 GN=Ces1c PE=1 SV=4
8961300	29240000	1438100	12300000	4914600	13116000	19819000	0.0293964	0.0757344	Ces1d	sp|Q8VCT4|EST1D_MOUSE Carboxylesterase 1D OS=Mus musculus OX=10090 GN=Ces1d PE=1 SV=1
22377000	27753000	33175000	19049000	18006000	23007000	21741000	1.25469	0.441287	Ces2g	tr|E9PV38|E9PV38_MOUSE Carboxylic ester hydrolase OS=Mus musculus OX=10090 GN=Ces2g PE=1 SV=1
174660	8098200	174660	5729100	174660	174660	10120000	0.127107	-0.524216	Ces5a	sp|Q6AW46|EST5A_MOUSE Carboxylesterase 5A OS=Mus musculus OX=10090 GN=Ces5a PE=2 SV=1
22503000	15195000	28252000	35652000	35732000	36128000	47322000	1.80982	-0.81624	Cetn1	sp|P41209|CETN1_MOUSE Centrin-1 OS=Mus musculus OX=10090 GN=Cetn1 PE=1 SV=1
174660	174660	9710500	6916500	9286800	2142700	1456200	0.177255	-0.562019	Cetn2	sp|Q9R1K9|CETN2_MOUSE Centrin-2 OS=Mus musculus OX=10090 GN=Cetn2 PE=1 SV=1
18659000	11524000	22941000	15838000	15527000	23786000	25216000	0.230773	-0.182202	Cetn3	sp|O35648|CETN3_MOUSE Centrin-3 OS=Mus musculus OX=10090 GN=Cetn3 PE=1 SV=1
58503000	39625000	80525000	115920000	136660000	121760000	154640000	2.42683	-1.15102	Cetn4	sp|Q8K4K1|CETN4_MOUSE Centrin-4 OS=Mus musculus OX=10090 GN=Cetn4 PE=1 SV=1
174660	174660	2482400	13224000	17248000	11772000	13045000	3.39152	-3.8722	Cfap161	sp|Q6P8Y0|CF161_MOUSE Cilia- and flagella-associated protein 161 OS=Mus musculus OX=10090 GN=Cfap161 PE=1 SV=1
31957000	31370000	30613000	37100000	42953000	42734000	53503000	1.59077	-0.493102	Cfap20	sp|Q8BTU1|CFA20_MOUSE Cilia- and flagella-associated protein 20 OS=Mus musculus OX=10090 GN=Cfap20 PE=1 SV=1
153180000	84989000	154810000	256070000	266380000	291950000	355280000	2.36693	-1.15855	Cfap36	sp|Q8C6E0|CFA36_MOUSE Cilia- and flagella-associated protein 36 OS=Mus musculus OX=10090 GN=Cfap36 PE=1 SV=1
30227000	26909000	22114000	22647000	28801000	37014000	42389000	0.513694	-0.308405	Cfap45	tr|Q9D9U9|Q9D9U9_MOUSE Ccdc19 protein OS=Mus musculus OX=10090 GN=Cfap45 PE=1 SV=1
17078000	1356100	12822000	18198000	23785000	25545000	23417000	1.43598	-1.12582	Cfap52	sp|Q5F201|CFA52_MOUSE Cilia- and flagella-associated protein 52 OS=Mus musculus OX=10090 GN=Cfap52 PE=1 SV=1
9937700	4340900	5489600	14798000	22401000	19820000	20980000	2.50651	-1.56524	Cfap57	sp|Q9D180|CFA57_MOUSE Cilia- and flagella-associated protein 57 OS=Mus musculus OX=10090 GN=Cfap57 PE=1 SV=3
14094000	4726000	8373400	20765000	13696000	14091000	13987000	1.07648	-0.786462	Cfap70	sp|D3YVL2|CFA70_MOUSE Cilia- and flagella-associated protein 70 OS=Mus musculus OX=10090 GN=Cfap70 PE=1 SV=2
174660	174660	174660	9818900	18940000	8014000	7205900	1.7069	-5.97612	Cfap74	sp|Q3UY96|CFA74_MOUSE Cilia- and flagella-associated protein 74 OS=Mus musculus OX=10090 GN=Cfap74 PE=2 SV=3
23356000	8190400	17926000	23159000	21911000	27324000	15354000	0.520255	-0.411705	Cfap97	sp|Q6ZPR1|CFA97_MOUSE Cilia- and flagella-associated protein 97 OS=Mus musculus OX=10090 GN=Cfap97 PE=1 SV=2
3310200	174660	174660	174660	3049700	174660	174660	0.097075	0.449281	Cfap99	tr|A0A140LIX9|A0A140LIX9_MOUSE Cilia and flagella-associated protein 99 OS=Mus musculus OX=10090 GN=Cfap99 PE=1 SV=1
38330000	44316000	29408000	40529000	23599000	31176000	22433000	0.597248	0.343664	Cfb	sp|P04186|CFAB_MOUSE Complement factor B OS=Mus musculus OX=10090 GN=Cfb PE=1 SV=2
23434000	58387000	31764000	30803000	34788000	23892000	39152000	0.237356	0.235527	Cfd	sp|P03953|CFAD_MOUSE Complement factor D OS=Mus musculus OX=10090 GN=Cfd PE=1 SV=1
72855000	85152000	71428000	62205000	69119000	72299000	60854000	1.05955	0.209981	Cfdp1	sp|O88271|CFDP1_MOUSE Craniofacial development protein 1 OS=Mus musculus OX=10090 GN=Cfdp1 PE=1 SV=1
24460000	22695000	17307000	27732000	23929000	23591000	21146000	0.483155	-0.165517	Cfh	sp|P06909|CFAH_MOUSE Complement factor H OS=Mus musculus OX=10090 GN=Cfh PE=1 SV=2
35215000	23138000	11077000	22129000	24902000	11102000	174660	0.421886	0.666911	Cfi	sp|Q61129|CFAI_MOUSE Complement factor I OS=Mus musculus OX=10090 GN=Cfi PE=1 SV=3
1078200000	1447000000	1316500000	1275700000	1339700000	1105100000	781470000	0.385469	0.186226	Cfl1	sp|P18760|COF1_MOUSE Cofilin-1 OS=Mus musculus OX=10090 GN=Cfl1 PE=1 SV=3
142290000	143880000	114390000	125500000	137000000	130410000	91027000	0.368396	0.142237	Cfl2	sp|P45591|COF2_MOUSE Cofilin-2 OS=Mus musculus OX=10090 GN=Cfl2 PE=1 SV=1
11247000	23928000	14518000	12145000	7306300	9974900	7764400	1.053	0.833142	Cggbp1	sp|Q8BHG9|CGBP1_MOUSE CGG triplet repeat-binding protein 1 OS=Mus musculus OX=10090 GN=Cggbp1 PE=1 SV=1
270930000	344460000	279110000	278570000	250750000	262810000	221150000	0.910195	0.235158	Cgn	sp|P59242|CING_MOUSE Cingulin OS=Mus musculus OX=10090 GN=Cgn PE=1 SV=1
19769000	20735000	16909000	16540000	13540000	12752000	11341000	1.74497	0.498841	Champ1	sp|Q8K327|CHAP1_MOUSE Chromosome alignment-maintaining phosphoprotein 1 OS=Mus musculus OX=10090 GN=Champ1 PE=1 SV=1
7668600	6005400	6094700	12318000	12800000	9070800	4395400	0.606451	-0.549755	Chchd1	sp|Q9CQA6|CHCH1_MOUSE Coiled-coil-helix-coiled-coil-helix domain-containing protein 1 OS=Mus musculus OX=10090 GN=Chchd1 PE=1 SV=1
17920000	35099000	41024000	16774000	24868000	23613000	25572000	0.644734	0.465237	Chchd10	tr|Q7TNL9|Q7TNL9_MOUSE Coiled-coil-helix-coiled-coil-helix domain-containing 10 OS=Mus musculus OX=10090 GN=Chchd10 PE=1 SV=1
467400000	775950000	565450000	592190000	607470000	612590000	523120000	0.0857362	0.0464193	Chchd2;Zbed5	sp|Q9D1L0|CHCH2_MOUSE Coiled-coil-helix-coiled-coil-helix domain-containing protein 2 OS=Mus musculus OX=10090 GN=Chchd2 PE=2 SV=1;tr|B2RPU8|B2RPU8_MOUSE SCAN domain containing 3 OS=Mus musculus OX=10090 GN=Zbed5 PE=1 SV=1
87728000	88273000	85243000	69476000	72064000	65974000	56546000	2.44172	0.39957	Chchd3	sp|Q9CRB9|MIC19_MOUSE MICOS complex subunit Mic19 OS=Mus musculus OX=10090 GN=Chchd3 PE=1 SV=1
45109000	37052000	39141000	41951000	38334000	41279000	49323000	0.272786	-0.0794018	Chchd6	sp|Q91VN4|MIC25_MOUSE MICOS complex subunit Mic25 OS=Mus musculus OX=10090 GN=Chchd6 PE=1 SV=2
174660	174660	174660	2335000	3351600	174660	174660	0.664254	-3.11095	Chd1	sp|P40201|CHD1_MOUSE Chromodomain-helicase-DNA-binding protein 1 OS=Mus musculus OX=10090 GN=Chd1 PE=1 SV=3
26513000	24799000	21840000	28065000	26554000	30634000	28609000	1.36419	-0.22328	Chd1l	sp|Q9CXF7|CHD1L_MOUSE Chromodomain-helicase-DNA-binding protein 1-like OS=Mus musculus OX=10090 GN=Chd1l PE=1 SV=1
67058000	1347000000	780470000	1129400000	196880000	1216200000	30516000	0.0650529	0.185499	Chd2	sp|E9PZM4|CHD2_MOUSE Chromodomain-helicase-DNA-binding protein 2 OS=Mus musculus OX=10090 GN=Chd2 PE=1 SV=1
7509300	5384300	7606300	7489900	3905000	4778800	5221800	0.636385	0.353347	Chd3	tr|B1AR17|B1AR17_MOUSE DNA helicase OS=Mus musculus OX=10090 GN=Chd3 PE=1 SV=1
75264000	86156000	78773000	65346000	71148000	78307000	74018000	0.922479	0.149066	Chd4	sp|Q6PDQ2|CHD4_MOUSE Chromodomain-helicase-DNA-binding protein 4 OS=Mus musculus OX=10090 GN=Chd4 PE=1 SV=1
174660	174660	18630000	174660	7927200	174660	174660	0.311369	1.58224	Chd6	sp|A3KFM7|CHD6_MOUSE Chromodomain-helicase-DNA-binding protein 6 OS=Mus musculus OX=10090 GN=Chd6 PE=1 SV=1
23652000	22732000	44185000	21546000	21665000	20579000	21272000	0.724329	0.50554	Chdh	sp|Q8BJ64|CHDH_MOUSE Choline dehydrogenase, mitochondrial OS=Mus musculus OX=10090 GN=Chdh PE=1 SV=1
71469000	45575000	52759000	44882000	57076000	64387000	55298000	0.0516616	0.0306616	Cherp	sp|Q8CGZ0|CHERP_MOUSE Calcium homeostasis endoplasmic reticulum protein OS=Mus musculus OX=10090 GN=Cherp PE=1 SV=1
9333900	174660	3175700	174660	174660	174660	2582600	0.689663	2.44468	Chfr	sp|Q810L3|CHFR_MOUSE E3 ubiquitin-protein ligase CHFR OS=Mus musculus OX=10090 GN=Chfr PE=1 SV=1
20710000	18042000	17237000	21888000	25363000	22888000	24306000	1.95177	-0.339294	Chid1	sp|Q922Q9|CHID1_MOUSE Chitinase domain-containing protein 1 OS=Mus musculus OX=10090 GN=Chid1 PE=1 SV=1
16463000	8756100	2434200	9446900	11968000	13970000	16647000	0.432493	-0.496907	Chka	sp|O54804|CHKA_MOUSE Choline kinase alpha OS=Mus musculus OX=10090 GN=Chka PE=1 SV=3
20185000	7873600	1249200	14920000	16315000	20975000	28342000	0.862808	-1.0436	Chkb	sp|O55229|CHKB_MOUSE Choline/ethanolamine kinase OS=Mus musculus OX=10090 GN=Chkb PE=1 SV=3
3112700	3873900	4831000	3268600	3190400	174660	13034000	0.107116	-0.319851	Chm	sp|Q9QXG2|RAE1_MOUSE Rab proteins geranylgeranyltransferase component A 1 OS=Mus musculus OX=10090 GN=Chm PE=1 SV=1
19804000	27901000	30359000	22956000	18727000	24532000	16244000	0.739464	0.336018	Chmp1a	sp|Q921W0|CHM1A_MOUSE Charged multivesicular body protein 1a OS=Mus musculus OX=10090 GN=Chmp1a PE=1 SV=1
4847600	174660	174660	174660	2017100	4367100	9418400	0.35576	-1.20525	Chmp1b1	sp|Q99LU0|CH1B1_MOUSE Charged multivesicular body protein 1b-1 OS=Mus musculus OX=10090 GN=Chmp1b1 PE=1 SV=1
13451000	31195000	24343000	19140000	24850000	14044000	16665000	0.360057	0.300315	Chmp1b2	sp|Q9CQD4|CH1B2_MOUSE Charged multivesicular body protein 1b-2 OS=Mus musculus OX=10090 GN=Chmp1b2 PE=2 SV=2
27369000	38957000	30701000	32313000	29218000	49141000	44867000	0.45332	-0.265781	Chmp2a	sp|Q9DB34|CHM2A_MOUSE Charged multivesicular body protein 2a OS=Mus musculus OX=10090 GN=Chmp2a PE=1 SV=1
118750000	82164000	110740000	122480000	99937000	104040000	59630000	0.153227	0.106057	Chmp2b	sp|Q8BJF9|CHM2B_MOUSE Charged multivesicular body protein 2b OS=Mus musculus OX=10090 GN=Chmp2b PE=1 SV=1
17244000	18353000	21310000	16340000	16671000	13426000	16017000	1.2642	0.28085	Chmp3	sp|Q9CQ10|CHMP3_MOUSE Charged multivesicular body protein 3 OS=Mus musculus OX=10090 GN=Chmp3 PE=1 SV=3
299210000	352930000	364870000	340800000	285690000	220760000	201640000	0.915347	0.370508	Chmp4b	sp|Q9D8B3|CHM4B_MOUSE Charged multivesicular body protein 4b OS=Mus musculus OX=10090 GN=Chmp4b PE=1 SV=2
161390000	200230000	163710000	164180000	139910000	85051000	115640000	1.08147	0.472604	Chmp5	sp|Q9D7S9|CHMP5_MOUSE Charged multivesicular body protein 5 OS=Mus musculus OX=10090 GN=Chmp5 PE=1 SV=1
23981000	19549000	16963000	33107000	23418000	21150000	24598000	0.728416	-0.342548	Chmp6	sp|P0C0A3|CHMP6_MOUSE Charged multivesicular body protein 6 OS=Mus musculus OX=10090 GN=Chmp6 PE=1 SV=2
19836000	32125000	31325000	16678000	22747000	23551000	36653000	0.184859	0.156546	Chmp7	sp|Q8R1T1|CHMP7_MOUSE Charged multivesicular body protein 7 OS=Mus musculus OX=10090 GN=Chmp7 PE=1 SV=1
10876000	13271000	10887000	10043000	9276500	17829000	15385000	0.227951	-0.169444	Chn1	sp|Q91V57|CHIN_MOUSE N-chimaerin OS=Mus musculus OX=10090 GN=Chn1 PE=1 SV=2
39003000	26288000	32789000	27381000	36352000	34121000	41163000	0.173219	-0.0881929	Chordc1	sp|Q9D1P4|CHRD1_MOUSE Cysteine and histidine-rich domain-containing protein 1 OS=Mus musculus OX=10090 GN=Chordc1 PE=1 SV=1
13366000	2684200	9861800	7137500	11356000	5959000	20799000	0.22229	-0.389308	Chp1	sp|P61022|CHP1_MOUSE Calcineurin B homologous protein 1 OS=Mus musculus OX=10090 GN=Chp1 PE=1 SV=2
14506000	11607000	14740000	15575000	11119000	13297000	24609000	0.289202	-0.246055	Chpt1	sp|Q8C025|CHPT1_MOUSE Cholinephosphotransferase 1 OS=Mus musculus OX=10090 GN=Chpt1 PE=1 SV=1
44699000	30199000	40493000	56836000	39724000	61591000	60628000	1.16234	-0.507906	Chrac1	sp|Q9JKP8|CHRC1_MOUSE Chromatin accessibility complex protein 1 OS=Mus musculus OX=10090 GN=Chrac1 PE=1 SV=1
25458000	26602000	27473000	19303000	19390000	16831000	19535000	3.44022	0.498566	Chtf8	sp|P0CG14|DERPC_MOUSE Decreased expression in renal and prostate cancer protein OS=Mus musculus OX=10090 GN=Derpc PE=1 SV=1
240620000	161990000	148890000	155340000	220200000	167480000	213900000	0.0616646	-0.0417424	Chtop	sp|Q9CY57|CHTOP_MOUSE Chromatin target of PRMT1 protein OS=Mus musculus OX=10090 GN=Chtop PE=1 SV=2
174660	174660	174660	174660	174660	6698600	6601700	0.692222	-4.28817	Chuk	sp|Q60680|IKKA_MOUSE Inhibitor of nuclear factor kappa-B kinase subunit alpha OS=Mus musculus OX=10090 GN=Chuk PE=1 SV=1
9504200	17790000	10184000	14134000	19252000	15864000	19797000	0.846215	-0.46649	Ciao1	sp|Q99KN2|CIAO1_MOUSE Probable cytosolic iron-sulfur protein assembly protein CIAO1 OS=Mus musculus OX=10090 GN=Ciao1 PE=1 SV=1
175540000	104740000	136920000	168190000	164390000	239380000	194750000	0.976689	-0.462904	Ciapin1	sp|Q8WTY4|CPIN1_MOUSE Anamorsin OS=Mus musculus OX=10090 GN=Ciapin1 PE=1 SV=1
174660	174660	174660	174660	2042200	174660	5848900	0.542201	-3.5601	Cib1	sp|Q9Z0F4|CIB1_MOUSE Calcium and integrin-binding protein 1 OS=Mus musculus OX=10090 GN=Cib1 PE=1 SV=3
3569900	174660	3605300	174660	174660	1682100	174660	0.883628	2.15127	Cic	sp|Q924A2|CIC_MOUSE Protein capicua homolog OS=Mus musculus OX=10090 GN=Cic PE=1 SV=2
298140000	334930000	218000000	386520000	308840000	268690000	248890000	0.161409	-0.096121	Cirbp	sp|P60824|CIRBP_MOUSE Cold-inducible RNA-binding protein OS=Mus musculus OX=10090 GN=Cirbp PE=1 SV=1
16639000	15902000	21357000	9281700	12165000	13482000	16299000	1.15801	0.488345	Cirh1a	sp|Q8R2N2|UTP4_MOUSE U3 small nucleolar RNA-associated protein 4 homolog OS=Mus musculus OX=10090 GN=Utp4 PE=2 SV=3
107010000	78744000	97831000	113680000	118970000	143260000	133160000	1.568	-0.429045	Cisd1	sp|Q91WS0|CISD1_MOUSE CDGSH iron-sulfur domain-containing protein 1 OS=Mus musculus OX=10090 GN=Cisd1 PE=1 SV=1
34292000	45790000	44359000	30352000	30335000	35850000	35479000	1.21029	0.329787	Cisd2	sp|Q9CQB5|CISD2_MOUSE CDGSH iron-sulfur domain-containing protein 2 OS=Mus musculus OX=10090 GN=Cisd2 PE=1 SV=1
46131000	20734000	33762000	40491000	43097000	49075000	33548000	0.498007	-0.308961	Cit	sp|P49025|CTRO_MOUSE Citron Rho-interacting kinase OS=Mus musculus OX=10090 GN=Cit PE=1 SV=3
14653000	17379000	16994000	12799000	13777000	10106000	8300400	1.57164	0.539224	Cited1	sp|P97769|CITE1_MOUSE Cbp/p300-interacting transactivator 1 OS=Mus musculus OX=10090 GN=Cited1 PE=1 SV=1
6604200	3486600	7947000	3407400	6524200	9197800	10763000	0.269888	-0.313718	Ciz1	tr|Q8VEH2|Q8VEH2_MOUSE CDKN1A-interacting zinc finger protein 1 OS=Mus musculus OX=10090 GN=Ciz1 PE=1 SV=1
1442900	174660	174660	11592000	2096200	2520600	3316500	0.765116	-3.03049	CK137956	tr|B1AYM9|B1AYM9_MOUSE cDNA sequence CK137956 OS=Mus musculus OX=10090 GN=CK137956 PE=4 SV=1
32858000	22729000	28827000	32249000	27054000	35966000	25391000	0.211279	-0.100356	Ckap2	sp|Q3V1H1|CKAP2_MOUSE Cytoskeleton-associated protein 2 OS=Mus musculus OX=10090 GN=Ckap2 PE=1 SV=1
4720700	16696000	11197000	10678000	174660	5878400	174660	0.764637	1.363	Ckap2l	sp|Q7TS74|CKP2L_MOUSE Cytoskeleton-associated protein 2-like OS=Mus musculus OX=10090 GN=Ckap2l PE=1 SV=1
134350000	143630000	128700000	168250000	145230000	131640000	134770000	0.38791	-0.0968477	Ckap4	sp|Q8BMK4|CKAP4_MOUSE Cytoskeleton-associated protein 4 OS=Mus musculus OX=10090 GN=Ckap4 PE=1 SV=2
91113000	82259000	87379000	86315000	86463000	78412000	72393000	0.612562	0.103574	Ckap5	sp|A2AGT5|CKAP5_MOUSE Cytoskeleton-associated protein 5 OS=Mus musculus OX=10090 GN=Ckap5 PE=1 SV=1
103020000	160520000	81339000	86320000	103740000	109210000	147300000	0.0460667	0.0422414	Ckb	sp|Q04447|KCRB_MOUSE Creatine kinase B-type OS=Mus musculus OX=10090 GN=Ckb PE=1 SV=1
8205100	2146300	4738700	9244000	12521000	13625000	9359400	1.58227	-1.15323	Cklf	sp|Q9DAS1|CKLF_MOUSE Chemokine-like factor OS=Mus musculus OX=10090 GN=Cklf PE=2 SV=1
16920000	18187000	10493000	8032600	11584000	6558500	15511000	0.737916	0.544505	Ckm	sp|P07310|KCRM_MOUSE Creatine kinase M-type OS=Mus musculus OX=10090 GN=Ckm PE=1 SV=1
174660	174660	4529500	174660	174660	2601900	174660	0.240023	1.05731	Cks1b;Cks1brt	sp|P61025|CKS1_MOUSE Cyclin-dependent kinases regulatory subunit 1 OS=Mus musculus OX=10090 GN=Cks1b PE=3 SV=1;tr|Q3UNC9|Q3UNC9_MOUSE Cyclin-dependent kinases regulatory subunit OS=Mus musculus OX=10090 GN=Cks1brt PE=2 SV=1
41303000	17402000	19682000	21005000	28990000	26731000	21383000	0.0846849	0.0912664	Cks2	sp|P56390|CKS2_MOUSE Cyclin-dependent kinases regulatory subunit 2 OS=Mus musculus OX=10090 GN=Cks2 PE=1 SV=1
19838000	19017000	16305000	11023000	13329000	17817000	14233000	1.13653	0.382914	Clasp1	sp|Q80TV8|CLAP1_MOUSE CLIP-associating protein 1 OS=Mus musculus OX=10090 GN=Clasp1 PE=1 SV=2
21170000	21872000	22408000	22000000	23929000	16861000	19617000	0.270417	0.0826638	Clasp2	sp|Q8BRT1|CLAP2_MOUSE CLIP-associating protein 2 OS=Mus musculus OX=10090 GN=Clasp2 PE=1 SV=1
9103800	8634000	6962100	9346200	6855300	5994900	2939900	0.534422	0.38977	Clasrp	sp|Q8CFC7|CLASR_MOUSE CLK4-associating serine/arginine rich protein OS=Mus musculus OX=10090 GN=Clasrp PE=1 SV=3
20179000	14580000	19373000	15900000	18163000	18715000	18558000	0.0438487	0.0168889	Clcc1	sp|Q99LI2|CLCC1_MOUSE Chloride channel CLIC-like protein 1 OS=Mus musculus OX=10090 GN=Clcc1 PE=1 SV=1
7961000	7055000	13422000	174660	9330700	7351300	6042300	0.607707	0.727575	Clcn2	sp|Q9R0A1|CLCN2_MOUSE Chloride channel protein 2 OS=Mus musculus OX=10090 GN=Clcn2 PE=1 SV=2
6324600	7879400	174660	174660	10140000	14451000	16468000	0.529678	-1.10486	Clcn7	sp|O70496|CLCN7_MOUSE H(+)/Cl(-) exchange transporter 7 OS=Mus musculus OX=10090 GN=Clcn7 PE=1 SV=1
28059000	32635000	67343000	5162800	14116000	58523000	33264000	0.365844	0.620184	Cldn11	sp|Q60771|CLD11_MOUSE Claudin-11 OS=Mus musculus OX=10090 GN=Cldn11 PE=1 SV=1
13317000	27956000	5267200	7612300	22225000	174660	174660	0.419556	1.03961	Clec10a	sp|P49300|CLC10_MOUSE C-type lectin domain family 10 member A OS=Mus musculus OX=10090 GN=Clec10a PE=1 SV=1
30281000	12860000	19330000	13843000	14380000	18448000	23349000	0.271368	0.250457	Clec12b	sp|Q149M0|CL12B_MOUSE C-type lectin domain family 12 member B OS=Mus musculus OX=10090 GN=Clec12b PE=1 SV=1
6718800	6306500	4439400	9620400	3065200	4614900	4294000	0.08385	0.108815	Clec3b	sp|P43025|TETN_MOUSE Tetranectin OS=Mus musculus OX=10090 GN=Clec3b PE=1 SV=2
188440000	101670000	178250000	248970000	256360000	372270000	450710000	1.44238	-1.08886	Clgn	sp|P52194|CLGN_MOUSE Calmegin OS=Mus musculus OX=10090 GN=Clgn PE=1 SV=2
176420000	232250000	284760000	206560000	219180000	185110000	219090000	0.362274	0.155781	Clic1	sp|Q9Z1Q5|CLIC1_MOUSE Chloride intracellular channel protein 1 OS=Mus musculus OX=10090 GN=Clic1 PE=1 SV=3
65850000	48812000	46080000	71321000	54730000	68751000	82643000	0.907701	-0.372417	Clic4	sp|Q9QYB1|CLIC4_MOUSE Chloride intracellular channel protein 4 OS=Mus musculus OX=10090 GN=Clic4 PE=1 SV=3
59211000	67611000	66342000	77723000	73728000	73900000	73325000	2.03348	-0.213718	Clint1	sp|Q99KN9|EPN4_MOUSE Clathrin interactor 1 OS=Mus musculus OX=10090 GN=Clint1 PE=1 SV=2
23933000	23983000	22617000	21991000	18270000	19471000	17492000	1.7348	0.284287	Clip1	sp|Q922J3|CLIP1_MOUSE CAP-Gly domain-containing linker protein 1 OS=Mus musculus OX=10090 GN=Clip1 PE=1 SV=1
5135400	174660	1854100	4737400	6268700	6410500	4136600	1.07975	-1.174	Cln6	tr|Q3U466|Q3U466_MOUSE Ceroid-lipofuscinosis, neuronal 6 OS=Mus musculus OX=10090 GN=Cln6 PE=1 SV=1
67627000	49603000	56568000	49991000	60842000	47777000	104510000	0.187398	-0.183272	Clns1a	sp|Q61189|ICLN_MOUSE Methylosome subunit pICln OS=Mus musculus OX=10090 GN=Clns1a PE=1 SV=1
67522000	48997000	51148000	83712000	35801000	51429000	43833000	0.0575559	0.0578102	Clpb	sp|Q60649|CLPB_MOUSE Caseinolytic peptidase B protein homolog OS=Mus musculus OX=10090 GN=Clpb PE=1 SV=1
43819000	49589000	39976000	64471000	48642000	50324000	47006000	0.735006	-0.242806	Clpp	sp|O88696|CLPP_MOUSE ATP-dependent Clp protease proteolytic subunit, mitochondrial OS=Mus musculus OX=10090 GN=Clpp PE=1 SV=1
20653000	26245000	22671000	27205000	21137000	35283000	27197000	0.558661	-0.25669	Clptm1	sp|Q8VBZ3|CLPT1_MOUSE Cleft lip and palate transmembrane protein 1 homolog OS=Mus musculus OX=10090 GN=Clptm1 PE=1 SV=1
25035000	20701000	21811000	33882000	31301000	40622000	35023000	2.36543	-0.644933	Clptm1l	sp|Q8BXA5|CLP1L_MOUSE Cleft lip and palate transmembrane protein 1-like protein OS=Mus musculus OX=10090 GN=Clptm1l PE=1 SV=1
48753000	52014000	42441000	46691000	48955000	39994000	37548000	0.503117	0.140811	Clpx	sp|Q9JHS4|CLPX_MOUSE ATP-dependent Clp protease ATP-binding subunit clpX-like, mitochondrial OS=Mus musculus OX=10090 GN=Clpx PE=1 SV=2
80219000	112980000	76025000	102790000	104410000	102500000	89322000	0.410205	-0.152624	Clta	sp|O08585|CLCA_MOUSE Clathrin light chain A OS=Mus musculus OX=10090 GN=Clta PE=1 SV=2
74416000	79206000	74848000	69437000	67939000	60942000	44293000	1.12162	0.328397	Cltb	sp|Q6IRU5|CLCB_MOUSE Clathrin light chain B OS=Mus musculus OX=10090 GN=Cltb PE=1 SV=1
442080000	389200000	390920000	409420000	412290000	472010000	464430000	0.609112	-0.10954	Cltc	sp|Q68FD5|CLH1_MOUSE Clathrin heavy chain 1 OS=Mus musculus OX=10090 GN=Cltc PE=1 SV=3
370670000	515060000	440660000	297600000	241810000	328400000	330300000	1.6913	0.561782	Clu	sp|Q06890|CLUS_MOUSE Clusterin OS=Mus musculus OX=10090 GN=Clu PE=1 SV=1
42249000	19092000	30037000	43895000	38112000	66804000	45839000	0.969305	-0.675926	Cluap1	sp|Q8R3P7|CLUA1_MOUSE Clusterin-associated protein 1 OS=Mus musculus OX=10090 GN=Cluap1 PE=1 SV=1
74420000	72954000	70883000	71909000	53190000	68315000	69713000	0.636115	0.145306	Cluh	sp|Q5SW19|CLU_MOUSE Clustered mitochondria protein homolog OS=Mus musculus OX=10090 GN=Cluh PE=1 SV=2
12822000	20694000	16485000	12710000	13050000	11183000	10933000	1.17993	0.477692	Clybl	sp|Q8R4N0|CLYBL_MOUSE Citramalyl-CoA lyase, mitochondrial OS=Mus musculus OX=10090 GN=Clybl PE=1 SV=2
174660	5301200	174660	174660	174660	174660	4181000	0.143299	0.679233	Cma1	sp|P21844|CMA1_MOUSE Chymase OS=Mus musculus OX=10090 GN=Cma1 PE=1 SV=2
47010000	48478000	42830000	42850000	43871000	30977000	33005000	1.00376	0.291318	Cmas	sp|Q99KK2|NEUA_MOUSE N-acylneuraminate cytidylyltransferase OS=Mus musculus OX=10090 GN=Cmas PE=1 SV=2
6702800	5900400	3617600	5450700	6090400	8091700	5750600	0.386291	-0.231003	Cmbl	sp|Q8R1G2|CMBL_MOUSE Carboxymethylenebutenolidase homolog OS=Mus musculus OX=10090 GN=Cmbl PE=1 SV=1
174660	10049000	174660	12544000	15807000	174660	174660	0.271419	-1.04968	Cmc1	sp|Q9CPZ8|COXM1_MOUSE COX assembly mitochondrial protein homolog OS=Mus musculus OX=10090 GN=Cmc1 PE=1 SV=1
9001800	8356300	8540900	8357100	8538900	7592600	174660	0.458969	0.48557	Cmc2	sp|Q8K199|COXM2_MOUSE COX assembly mitochondrial protein 2 homolog OS=Mus musculus OX=10090 GN=Cmc2 PE=3 SV=1
121480000	127310000	154020000	127200000	136330000	109350000	67875000	0.555121	0.28516	Cmpk1	sp|Q9DBP5|KCY_MOUSE UMP-CMP kinase OS=Mus musculus OX=10090 GN=Cmpk1 PE=1 SV=1
5142900	3387100	174660	6340000	7901900	174660	174660	0.100839	-0.330203	Cmtm2a	sp|Q9DAR1|CLF2A_MOUSE CKLF-like MARVEL transmembrane domain-containing protein 2A OS=Mus musculus OX=10090 GN=Cmtm2a PE=2 SV=1
174660	174660	174660	174660	174660	174660	174660	#DIV/0!	0	Cmtm4	sp|Q8CJ61|CKLF4_MOUSE CKLF-like MARVEL transmembrane domain-containing protein 4 OS=Mus musculus OX=10090 GN=Cmtm4 PE=1 SV=1
174660	7558200	174660	10096000	174660	174660	5698700	0.150891	-0.614665	Cmtm6	sp|Q9CZ69|CKLF6_MOUSE CKLF-like MARVEL transmembrane domain-containing protein 6 OS=Mus musculus OX=10090 GN=Cmtm6 PE=1 SV=1
45640000	35962000	34810000	36603000	39752000	39707000	44347000	0.141945	-0.0474778	Cmtr1	sp|Q9DBC3|CMTR1_MOUSE Cap-specific mRNA (nucleoside-2-O-)-methyltransferase 1 OS=Mus musculus OX=10090 GN=Cmtr1 PE=1 SV=1
181960000	192240000	171620000	179630000	169050000	153980000	140660000	0.921701	0.177926	Cndp2	sp|Q9D1A2|CNDP2_MOUSE Cytosolic non-specific dipeptidase OS=Mus musculus OX=10090 GN=Cndp2 PE=1 SV=1
25352000	13170000	174660	18182000	23873000	28404000	50571000	0.810702	-1.23005	Cnih4	sp|Q9CX13|CNIH4_MOUSE Protein cornichon homolog 4 OS=Mus musculus OX=10090 GN=Cnih4 PE=2 SV=1
66451000	197150000	53238000	49355000	57814000	45474000	169390000	0.186903	0.391579	Cnn1	sp|Q08091|CNN1_MOUSE Calponin-1 OS=Mus musculus OX=10090 GN=Cnn1 PE=1 SV=1
25329000	42203000	20524000	22026000	14583000	13459000	16400000	1.07064	0.820799	Cnn2	sp|Q08093|CNN2_MOUSE Calponin-2 OS=Mus musculus OX=10090 GN=Cnn2 PE=1 SV=1
49150000	64738000	75922000	44589000	34927000	39655000	40716000	1.70264	0.662541	Cnn3	sp|Q9DAW9|CNN3_MOUSE Calponin-3 OS=Mus musculus OX=10090 GN=Cnn3 PE=1 SV=1
7907700	4919800	7016800	5945100	5194800	7419100	6500900	0.14208	0.0783815	Cnnm4	sp|Q69ZF7|CNNM4_MOUSE Metal transporter CNNM4 OS=Mus musculus OX=10090 GN=Cnnm4 PE=1 SV=2
44931000	37247000	39094000	34970000	40912000	40665000	47561000	0.0585458	-0.0213616	Cnot1	sp|Q6ZQ08|CNOT1_MOUSE CCR4-NOT transcription complex subunit 1 OS=Mus musculus OX=10090 GN=Cnot1 PE=1 SV=2
39489000	26475000	30472000	28989000	34100000	38808000	31312000	0.103524	-0.0510103	Cnot10	sp|Q8BH15|CNO10_MOUSE CCR4-NOT transcription complex subunit 10 OS=Mus musculus OX=10090 GN=Cnot10 PE=1 SV=1
15779000	30516000	16161000	20983000	20375000	21669000	25306000	0.10863	-0.0850748	Cnot11	sp|Q9CWN7|CNO11_MOUSE CCR4-NOT transcription complex subunit 11 OS=Mus musculus OX=10090 GN=Cnot11 PE=1 SV=1
30685000	24154000	34139000	30441000	35141000	30258000	35860000	0.482689	-0.150697	Cnot2	sp|Q8C5L3|CNOT2_MOUSE CCR4-NOT transcription complex subunit 2 OS=Mus musculus OX=10090 GN=Cnot2 PE=1 SV=2
47620000	69529000	46781000	53331000	46369000	47113000	46525000	0.421535	0.176992	Cnot3	sp|Q8K0V4|CNOT3_MOUSE CCR4-NOT transcription complex subunit 3 OS=Mus musculus OX=10090 GN=Cnot3 PE=1 SV=1
13015000	9909000	13335000	20533000	9396800	12962000	8417600	0.0783083	-0.0858465	Cnot4	sp|Q8BT14|CNOT4_MOUSE CCR4-NOT transcription complex subunit 4 OS=Mus musculus OX=10090 GN=Cnot4 PE=1 SV=2
7770500	8674900	5340900	174660	4622800	4563000	5835700	1.01862	0.934752	Cnot6l	sp|Q8VEG6|CNO6L_MOUSE CCR4-NOT transcription complex subunit 6-like OS=Mus musculus OX=10090 GN=Cnot6l PE=1 SV=2
90755000	111800000	77438000	145120000	89134000	93754000	99786000	0.328191	-0.196488	Cnot7	sp|Q60809|CNOT7_MOUSE CCR4-NOT transcription complex subunit 7 OS=Mus musculus OX=10090 GN=Cnot7 PE=1 SV=1
28282000	12878000	34492000	12830000	16621000	14867000	19674000	0.787278	0.656524	Cnot8	sp|Q9D8X5|CNOT8_MOUSE CCR4-NOT transcription complex subunit 8 OS=Mus musculus OX=10090 GN=Cnot8 PE=2 SV=1
14622000	12148000	13700000	8999800	11801000	8024900	8668300	1.78908	0.525231	Cnp	sp|P16330|CN37_MOUSE 2,3-cyclic-nucleotide 3-phosphodiesterase OS=Mus musculus OX=10090 GN=Cnp PE=1 SV=3
37493000	46314000	33261000	41501000	58922000	35836000	45840000	0.42865	-0.222339	Cnpy2	sp|Q9QXT0|CNPY2_MOUSE Protein canopy homolog 2 OS=Mus musculus OX=10090 GN=Cnpy2 PE=1 SV=1
68783000	77067000	78598000	56333000	67726000	58382000	67286000	1.44984	0.261067	Cnpy3	sp|Q9DAU1|CNPY3_MOUSE Protein canopy homolog 3 OS=Mus musculus OX=10090 GN=Cnpy3 PE=1 SV=1
25814000	21120000	18836000	26294000	19576000	19298000	14643000	0.237863	0.13588	Cnpy4	sp|Q8BQ47|CNPY4_MOUSE Protein canopy homolog 4 OS=Mus musculus OX=10090 GN=Cnpy4 PE=1 SV=1
37360000	42600000	37914000	47797000	21581000	45606000	26476000	0.191585	0.151889	Cnst	sp|Q8CBC4|CNST_MOUSE Consortin OS=Mus musculus OX=10090 GN=Cnst PE=1 SV=1
2223000	952300	2487200	174660	174660	1325100	174660	1.38326	2.02967	Cntfr	sp|O88507|CNTFR_MOUSE Ciliary neurotrophic factor receptor subunit alpha OS=Mus musculus OX=10090 GN=Cntfr PE=1 SV=2
12878000	9661000	11932000	12239000	7516300	12896000	9052100	0.250274	0.140256	Cntrl	sp|A2AL36|CNTRL_MOUSE Centriolin OS=Mus musculus OX=10090 GN=Cntrl PE=1 SV=2
12119000	12806000	17893000	19789000	19934000	17447000	12318000	0.543047	-0.283509	Coa3	sp|Q9D2R6|COA3_MOUSE Cytochrome c oxidase assembly factor 3 homolog, mitochondrial OS=Mus musculus OX=10090 GN=Coa3 PE=1 SV=1
10838000	13478000	8854700	11332000	7981300	9908600	7595400	0.55602	0.264563	Coa7	sp|Q921H9|COA7_MOUSE Cytochrome c oxidase assembly factor 7 OS=Mus musculus OX=10090 GN=Coa7 PE=1 SV=1
34942000	31434000	36621000	31647000	26952000	43428000	38798000	0.0683508	-0.0362637	Coasy	sp|Q9DBL7|COASY_MOUSE Bifunctional coenzyme A synthase OS=Mus musculus OX=10090 GN=Coasy PE=1 SV=2
14428000	20715000	18538000	29541000	24664000	21934000	16856000	0.730897	-0.377704	Cobll1	sp|Q3UMF0|COBL1_MOUSE Cordon-bleu protein-like 1 OS=Mus musculus OX=10090 GN=Cobll1 PE=1 SV=2
37490000	28887000	33871000	37132000	43160000	41595000	58817000	0.97583	-0.435017	Cog1	sp|Q9Z160|COG1_MOUSE Conserved oligomeric Golgi complex subunit 1 OS=Mus musculus OX=10090 GN=Cog1 PE=1 SV=3
26853000	20953000	30912000	31651000	35439000	31086000	30117000	1.04422	-0.289639	Cog2	sp|Q921L5|COG2_MOUSE Conserved oligomeric Golgi complex subunit 2 OS=Mus musculus OX=10090 GN=Cog2 PE=1 SV=2
42767000	26311000	27622000	29659000	23295000	30939000	45780000	0.0086044	-0.00825282	Cog3	sp|Q8CI04|COG3_MOUSE Conserved oligomeric Golgi complex subunit 3 OS=Mus musculus OX=10090 GN=Cog3 PE=1 SV=3
16756000	16391000	18727000	15950000	19008000	21829000	28039000	0.579859	-0.294457	Cog4	sp|Q8R1U1|COG4_MOUSE Conserved oligomeric Golgi complex subunit 4 OS=Mus musculus OX=10090 GN=Cog4 PE=1 SV=1
41522000	32027000	33329000	38307000	43274000	37667000	45031000	0.798989	-0.205146	Cog5	sp|Q8C0L8|COG5_MOUSE Conserved oligomeric Golgi complex subunit 5 OS=Mus musculus OX=10090 GN=Cog5 PE=1 SV=3
30597000	17641000	25720000	30826000	27741000	46411000	44160000	0.980354	-0.596832	Cog6	sp|Q8R3I3|COG6_MOUSE Conserved oligomeric Golgi complex subunit 6 OS=Mus musculus OX=10090 GN=Cog6 PE=1 SV=2
24819000	18492000	26919000	27885000	32196000	29470000	35480000	1.37503	-0.417089	Cog7	sp|Q3UM29|COG7_MOUSE Conserved oligomeric Golgi complex subunit 7 OS=Mus musculus OX=10090 GN=Cog7 PE=1 SV=1
17851000	13957000	13850000	13209000	17135000	18994000	26729000	0.47903	-0.321366	Cog8	sp|Q9JJA2|COG8_MOUSE Conserved oligomeric Golgi complex subunit 8 OS=Mus musculus OX=10090 GN=Cog8 PE=1 SV=3
8869900	9222400	11795000	5262000	10747000	8947500	7153600	0.554778	0.311543	Coil	sp|Q5SU73|COIL_MOUSE Coilin OS=Mus musculus OX=10090 GN=Coil PE=1 SV=1
24815000	32876000	15101000	23695000	18777000	21139000	32750000	0.0103173	0.010368	Col12a1	sp|Q60847|COCA1_MOUSE Collagen alpha-1(XII) chain OS=Mus musculus OX=10090 GN=Col12a1 PE=2 SV=3
63477000	94478000	54478000	59826000	41921000	44521000	66867000	0.665476	0.410278	Col14a1	sp|Q80X19|COEA1_MOUSE Collagen alpha-1(XIV) chain OS=Mus musculus OX=10090 GN=Col14a1 PE=1 SV=2
32686000	35464000	38058000	38686000	25954000	51275000	49582000	0.361476	-0.224875	Col15a1	sp|O35206|COFA1_MOUSE Collagen alpha-1(XV) chain OS=Mus musculus OX=10090 GN=Col15a1 PE=1 SV=2
11750000	629060	4106000	6737000	6243500	8816000	11832000	0.40318	-0.613488	Col16a1	sp|Q8BLX7|COGA1_MOUSE Collagen alpha-1(XVI) chain OS=Mus musculus OX=10090 GN=Col16a1 PE=1 SV=2
105360000	98329000	125470000	90634000	92436000	109290000	121640000	0.22333	0.0841914	Col18a1	sp|P39061|COIA1_MOUSE Collagen alpha-1(XVIII) chain OS=Mus musculus OX=10090 GN=Col18a1 PE=1 SV=4
304860000	480530000	163980000	270220000	152440000	74063000	116960000	0.871365	1.04451	Col1a1	sp|P11087|CO1A1_MOUSE Collagen alpha-1(I) chain OS=Mus musculus OX=10090 GN=Col1a1 PE=1 SV=4
145510000	229550000	89271000	142980000	70175000	41952000	66827000	0.845884	0.943426	Col1a2	sp|Q01149|CO1A2_MOUSE Collagen alpha-2(I) chain OS=Mus musculus OX=10090 GN=Col1a2 PE=1 SV=2
16287000	36120000	24241000	22122000	27271000	32043000	24815000	0.0658874	-0.0561189	Col3a1	sp|P08121|CO3A1_MOUSE Collagen alpha-1(III) chain OS=Mus musculus OX=10090 GN=Col3a1 PE=1 SV=4
20517000	9361200	13968000	19384000	14323000	7284300	15467000	0.0429105	0.0503036	Col4a2	sp|P08122|CO4A2_MOUSE Collagen alpha-2(IV) chain OS=Mus musculus OX=10090 GN=Col4a2 PE=1 SV=4
174660	174660	174660	174660	174660	174660	174660	#DIV/0!	0	Col4a3	sp|Q9QZS0|CO4A3_MOUSE Collagen alpha-3(IV) chain OS=Mus musculus OX=10090 GN=Col4a3 PE=1 SV=2
174660	6403500	7604400	3818000	174660	2720500	174660	0.633464	1.45704	Col4a3bp	sp|Q9EQG9|CERT_MOUSE Ceramide transfer protein OS=Mus musculus OX=10090 GN=Cert1 PE=1 SV=1
21145000	14511000	11038000	12936000	7227000	8377900	4596600	1.1335	0.90981	Col5a2	sp|Q3U962|CO5A2_MOUSE Collagen alpha-2(V) chain OS=Mus musculus OX=10090 GN=Col5a2 PE=1 SV=1
288090000	320840000	335760000	233080000	203410000	170660000	305330000	1.21712	0.465086	Col6a1	sp|Q04857|CO6A1_MOUSE Collagen alpha-1(VI) chain OS=Mus musculus OX=10090 GN=Col6a1 PE=1 SV=1
173770000	217860000	186740000	122940000	98564000	97318000	161980000	1.74393	0.681587	Col6a2	sp|Q02788|CO6A2_MOUSE Collagen alpha-2(VI) chain OS=Mus musculus OX=10090 GN=Col6a2 PE=1 SV=3
390300000	378010000	387990000	252520000	252620000	225770000	388620000	1.22007	0.46166	Col6a3	tr|E9PWQ3|E9PWQ3_MOUSE Collagen, type VI, alpha 3 OS=Mus musculus OX=10090 GN=Col6a3 PE=1 SV=2
43512000	37685000	60803000	28533000	26353000	35838000	33505000	1.29545	0.607926	Col6a4	sp|A2AX52|CO6A4_MOUSE Collagen alpha-4(VI) chain OS=Mus musculus OX=10090 GN=Col6a4 PE=1 SV=2
44560000	67841000	36300000	28479000	16340000	22025000	43536000	1.04126	0.844973	Col6a5	sp|A6H584|CO6A5_MOUSE Collagen alpha-5(VI) chain OS=Mus musculus OX=10090 GN=Col6a5 PE=1 SV=4
15539000	33445000	13159000	11514000	1418100	8131900	14767000	0.911774	1.20942	Col6a6	sp|Q8C6K9|CO6A6_MOUSE Collagen alpha-6(VI) chain OS=Mus musculus OX=10090 GN=Col6a6 PE=1 SV=2
102600000	4149500	3489000	69895000	68812000	174660	174660	0.0183788	0.0799963	Colec12	sp|Q8K4Q8|COL12_MOUSE Collectin-12 OS=Mus musculus OX=10090 GN=Colec12 PE=1 SV=1
144980000	170870000	142530000	161410000	151490000	125730000	135160000	0.322262	0.0910588	Colgalt1	sp|Q8K297|GT251_MOUSE Procollagen galactosyltransferase 1 OS=Mus musculus OX=10090 GN=Colgalt1 PE=1 SV=2
11205000	9901400	10756000	8587000	6978800	11149000	5887200	0.867675	0.381932	Commd1	sp|Q8K4M5|COMD1_MOUSE COMM domain-containing protein 1 OS=Mus musculus OX=10090 GN=Commd1 PE=1 SV=2
4723200	8629500	6949600	13434000	4144700	174660	174660	0.239832	0.594465	Commd10	sp|Q8JZY2|COMDA_MOUSE COMM domain-containing protein 10 OS=Mus musculus OX=10090 GN=Commd10 PE=1 SV=1
5336800	7040600	17797000	10311000	7287700	7794700	13828000	0.0230331	0.0367216	Commd2	sp|Q8BXC6|COMD2_MOUSE COMM domain-containing protein 2 OS=Mus musculus OX=10090 GN=Commd2 PE=1 SV=1
18072000	16690000	23118000	8616100	20043000	20648000	22405000	0.124643	0.105886	Commd3	sp|Q63829|COMD3_MOUSE COMM domain-containing protein 3 OS=Mus musculus OX=10090 GN=Commd3 PE=1 SV=1
16390000	3250000	9545500	3750000	8690100	8502200	3667200	0.438231	0.661074	Commd4	sp|Q9CQ02|COMD4_MOUSE COMM domain-containing protein 4 OS=Mus musculus OX=10090 GN=Commd4 PE=1 SV=1
4971800	12335000	3928300	9441600	9120000	174660	3180400	0.176542	0.36946	Commd6	sp|Q3V4B5|COMD6_MOUSE COMM domain-containing protein 6 OS=Mus musculus OX=10090 GN=Commd6 PE=1 SV=1
13659000	8207700	174660	9316600	8999400	15061000	40459000	0.535761	-1.32907	Commd7	sp|Q8BG94|COMD7_MOUSE COMM domain-containing protein 7 OS=Mus musculus OX=10090 GN=Commd7 PE=1 SV=1
20173000	45112000	92802000	16927000	28232000	24604000	38085000	0.64895	0.966757	Commd9	sp|Q8K2Q0|COMD9_MOUSE COMM domain-containing protein 9 OS=Mus musculus OX=10090 GN=Commd9 PE=1 SV=3
38774000	36405000	30554000	31214000	38493000	31914000	31638000	0.272046	0.0812302	Comt	sp|O88587|COMT_MOUSE Catechol O-methyltransferase OS=Mus musculus OX=10090 GN=Comt PE=1 SV=2
154560000	138960000	146190000	145180000	161040000	154520000	153210000	0.592306	-0.0665313	Copa	sp|Q8CIE6|COPA_MOUSE Coatomer subunit alpha OS=Mus musculus OX=10090 GN=Copa PE=1 SV=2
126320000	105730000	128950000	121400000	135370000	156500000	142170000	0.851319	-0.206595	Copb1	sp|Q9JIF7|COPB_MOUSE Coatomer subunit beta OS=Mus musculus OX=10090 GN=Copb1 PE=1 SV=1
157050000	124470000	131570000	137710000	127390000	137970000	140960000	0.0663458	0.0178074	Copb2	sp|O55029|COPB2_MOUSE Coatomer subunit beta OS=Mus musculus OX=10090 GN=Copb2 PE=1 SV=2
91942000	74619000	73325000	79238000	85124000	89584000	108420000	0.536796	-0.180061	Cope	sp|O89079|COPE_MOUSE Coatomer subunit epsilon OS=Mus musculus OX=10090 GN=Cope PE=1 SV=3
140580000	129520000	140890000	115760000	133340000	131930000	137450000	0.516446	0.0798525	Copg1	sp|Q9QZE5|COPG1_MOUSE Coatomer subunit gamma-1 OS=Mus musculus OX=10090 GN=Copg1 PE=1 SV=1
256350000	235020000	235310000	243520000	243360000	316010000	314100000	0.69619	-0.205187	Copg2	sp|Q9QXK3|COPG2_MOUSE Coatomer subunit gamma-2 OS=Mus musculus OX=10090 GN=Copg2 PE=1 SV=1
55108000	32465000	34753000	44510000	63121000	44742000	85533000	0.679433	-0.544623	Coprs	sp|Q9CQ13|COPRS_MOUSE Coordinator of PRMT5 and differentiation stimulator OS=Mus musculus OX=10090 GN=Coprs PE=1 SV=1
139400000	133980000	134790000	128230000	139890000	144060000	134010000	0.0390265	-0.00519525	Cops2	sp|P61202|CSN2_MOUSE COP9 signalosome complex subunit 2 OS=Mus musculus OX=10090 GN=Cops2 PE=1 SV=1
109010000	87702000	104600000	113920000	124670000	154620000	110320000	0.961614	-0.325782	Cops3	sp|O88543|CSN3_MOUSE COP9 signalosome complex subunit 3 OS=Mus musculus OX=10090 GN=Cops3 PE=1 SV=3
162250000	138080000	154150000	157380000	181340000	177110000	175690000	1.2501	-0.190517	Cops4	sp|O88544|CSN4_MOUSE COP9 signalosome complex subunit 4 OS=Mus musculus OX=10090 GN=Cops4 PE=1 SV=1
82342000	69854000	86980000	78707000	65203000	89426000	67697000	0.226359	0.0831885	Cops5	sp|O35864|CSN5_MOUSE COP9 signalosome complex subunit 5 OS=Mus musculus OX=10090 GN=Cops5 PE=1 SV=3
54522000	40563000	42894000	54222000	81926000	71657000	60880000	1.33086	-0.54643	Cops6	sp|O88545|CSN6_MOUSE COP9 signalosome complex subunit 6 OS=Mus musculus OX=10090 GN=Cops6 PE=1 SV=1
63696000	43387000	44046000	56124000	61374000	57008000	71830000	0.766655	-0.289809	Cops7a	sp|Q9CZ04|CSN7A_MOUSE COP9 signalosome complex subunit 7a OS=Mus musculus OX=10090 GN=Cops7a PE=1 SV=2
40432000	51890000	39685000	45433000	30268000	41021000	46582000	0.230071	0.108092	Cops7b	sp|Q8BV13|CSN7B_MOUSE COP9 signalosome complex subunit 7b OS=Mus musculus OX=10090 GN=Cops7b PE=1 SV=1
181580000	135580000	147180000	180730000	155470000	188250000	202850000	0.7921	-0.232332	Cops8	sp|Q8VBV7|CSN8_MOUSE COP9 signalosome complex subunit 8 OS=Mus musculus OX=10090 GN=Cops8 PE=1 SV=1
214100000	312440000	215210000	261190000	269280000	163030000	201190000	0.232439	0.144583	Copz1	sp|P61924|COPZ1_MOUSE Coatomer subunit zeta-1 OS=Mus musculus OX=10090 GN=Copz1 PE=1 SV=1
7043200	16969000	21082000	24323000	23446000	16738000	10459000	0.295877	-0.318257	Copz2	sp|Q9JHH9|COPZ2_MOUSE Coatomer subunit zeta-2 OS=Mus musculus OX=10090 GN=Copz2 PE=1 SV=1
18798000	23816000	13234000	19122000	25150000	20941000	24268000	0.562731	-0.265038	Coq3	sp|Q8BMS4|COQ3_MOUSE Ubiquinone biosynthesis O-methyltransferase, mitochondrial OS=Mus musculus OX=10090 GN=Coq3 PE=1 SV=1
16958000	9299000	13267000	9732600	15538000	17086000	8646300	0.0475752	0.0471872	Coq4	sp|Q8BGB8|COQ4_MOUSE Ubiquinone biosynthesis protein COQ4 homolog, mitochondrial OS=Mus musculus OX=10090 GN=Coq4 PE=1 SV=1
12227000	9544300	3884200	10610000	12355000	9714400	22829000	0.594433	-0.6984	Coq5	sp|Q9CXI0|COQ5_MOUSE 2-methoxy-6-polyprenyl-1,4-benzoquinol methylase, mitochondrial OS=Mus musculus OX=10090 GN=Coq5 PE=1 SV=2
1046300000	527420000	747890000	991190000	862850000	1147600000	987130000	0.743989	-0.365781	Coq6	sp|Q8R1S0|COQ6_MOUSE Ubiquinone biosynthesis monooxygenase COQ6, mitochondrial OS=Mus musculus OX=10090 GN=Coq6 PE=1 SV=3
16217000	14785000	14525000	16623000	17535000	18952000	26547000	0.850488	-0.392041	Coq7	sp|P97478|COQ7_MOUSE 5-demethoxyubiquinone hydroxylase, mitochondrial OS=Mus musculus OX=10090 GN=Coq7 PE=1 SV=3
72327000	41123000	56320000	56802000	69669000	63349000	82136000	0.521824	-0.264754	Coq9	sp|Q8K1Z0|COQ9_MOUSE Ubiquinone biosynthesis protein COQ9, mitochondrial OS=Mus musculus OX=10090 GN=Coq9 PE=1 SV=1
10466000	13175000	10916000	12314000	10615000	16771000	13702000	0.482837	-0.212878	Coro1a	sp|O89053|COR1A_MOUSE Coronin-1A OS=Mus musculus OX=10090 GN=Coro1a PE=1 SV=5
124860000	114830000	123220000	149720000	144650000	160000000	160950000	2.76948	-0.346688	Coro1b	sp|Q9WUM3|COR1B_MOUSE Coronin-1B OS=Mus musculus OX=10090 GN=Coro1b PE=1 SV=1
91392000	88253000	83335000	87733000	98574000	82479000	71379000	0.141104	0.0437559	Coro1c	sp|Q9WUM4|COR1C_MOUSE Coronin-1C OS=Mus musculus OX=10090 GN=Coro1c PE=1 SV=2
1939300	4534000	174660	174660	2364600	2957400	3655200	0.0174926	-0.0461158	Coro2a	sp|Q8C0P5|COR2A_MOUSE Coronin-2A OS=Mus musculus OX=10090 GN=Coro2a PE=2 SV=1
8987600	7333200	6189600	12943000	8643500	9886100	11200000	1.24512	-0.507681	Coro7	sp|Q9D2V7|CORO7_MOUSE Coronin-7 OS=Mus musculus OX=10090 GN=Coro7 PE=1 SV=2
127870000	194710000	151890000	159760000	142970000	180340000	162110000	0.05887	-0.0283473	Cotl1	sp|Q9CQI6|COTL1_MOUSE Coactosin-like protein OS=Mus musculus OX=10090 GN=Cotl1 PE=1 SV=3
13530000	174660	174660	174660	174660	174660	11317000	0.124236	0.644186	Cox10	sp|Q8CFY5|COX10_MOUSE Protoheme IX farnesyltransferase, mitochondrial OS=Mus musculus OX=10090 GN=Cox10 PE=2 SV=1
7614800	8128800	12660000	7656700	16869000	11784000	9686900	0.313902	-0.280416	Cox16	sp|Q9CR63|COX16_MOUSE Cytochrome c oxidase assembly protein COX16 homolog, mitochondrial OS=Mus musculus OX=10090 GN=Cox16 PE=3 SV=1
171590000	138290000	172020000	158560000	152580000	127210000	78878000	0.622846	0.312971	Cox17	sp|P56394|COX17_MOUSE Cytochrome c oxidase copper chaperone OS=Mus musculus OX=10090 GN=Cox17 PE=1 SV=2
8563200	2663100	6418900	5072300	5961600	5418400	7364000	0.0155471	-0.017636	Cox20	sp|Q9D7J4|COX20_MOUSE Cytochrome c oxidase assembly protein COX20, mitochondrial OS=Mus musculus OX=10090 GN=Cox20 PE=1 SV=1
314800000	273020000	334390000	353340000	410010000	361900000	325390000	1.07216	-0.238485	Cox4i1	sp|P19783|COX41_MOUSE Cytochrome c oxidase subunit 4 isoform 1, mitochondrial OS=Mus musculus OX=10090 GN=Cox4i1 PE=1 SV=2
234560000	199310000	216100000	262340000	222160000	195430000	192270000	0.0224374	-0.00924836	Cox5a	sp|P12787|COX5A_MOUSE Cytochrome c oxidase subunit 5A, mitochondrial OS=Mus musculus OX=10090 GN=Cox5a PE=1 SV=2
116780000	81752000	120360000	107340000	136640000	108700000	91609000	0.116303	-0.063393	Cox5b	sp|P19536|COX5B_MOUSE Cytochrome c oxidase subunit 5B, mitochondrial OS=Mus musculus OX=10090 GN=Cox5b PE=1 SV=1
286400000	181370000	214320000	319590000	281280000	301900000	442510000	1.08731	-0.564835	Cox6a1	sp|P43024|CX6A1_MOUSE Cytochrome c oxidase subunit 6A1, mitochondrial OS=Mus musculus OX=10090 GN=Cox6a1 PE=1 SV=2
68144000	64633000	69404000	66536000	57417000	71238000	87345000	0.164901	-0.0677498	Cox6b1	sp|P56391|CX6B1_MOUSE Cytochrome c oxidase subunit 6B1 OS=Mus musculus OX=10090 GN=Cox6b1 PE=1 SV=2
70722000	24048000	25913000	34103000	62151000	91073000	99091000	0.68323	-0.831862	Cox6b2	sp|Q80ZN9|CX6B2_MOUSE Cytochrome c oxidase subunit 6B2 OS=Mus musculus OX=10090 GN=Cox6b2 PE=1 SV=1
455690000	315930000	323800000	437420000	435290000	414480000	583270000	0.834501	-0.356871	Cox6c	sp|Q9CPQ1|COX6C_MOUSE Cytochrome c oxidase subunit 6C OS=Mus musculus OX=10090 GN=Cox6c PE=1 SV=3
46921000	65564000	45967000	28328000	25155000	24574000	19820000	2.36793	1.11004	Cox7a1	sp|P56392|CX7A1_MOUSE Cytochrome c oxidase subunit 7A1, mitochondrial OS=Mus musculus OX=10090 GN=Cox7a1 PE=1 SV=1
118830000	123250000	112050000	159880000	81028000	150830000	135830000	0.267438	-0.16004	Cox7a2	sp|P48771|CX7A2_MOUSE Cytochrome c oxidase subunit 7A2, mitochondrial OS=Mus musculus OX=10090 GN=Cox7a2 PE=1 SV=2
34347000	14078000	37479000	25356000	23935000	63671000	31549000	0.237487	-0.335345	Cox7a2l	sp|Q61387|COX7R_MOUSE Cytochrome c oxidase subunit 7A-related protein, mitochondrial OS=Mus musculus OX=10090 GN=Cox7a2l PE=1 SV=1
33348000	44495000	45404000	75513000	41221000	103580000	79341000	1.09012	-0.866712	Cox7c	sp|P17665|COX7C_MOUSE Cytochrome c oxidase subunit 7C, mitochondrial OS=Mus musculus OX=10090 GN=Cox7c PE=1 SV=1
119820000	136320000	99745000	93560000	80944000	70335000	61110000	1.75321	0.633157	Cp	sp|Q61147|CERU_MOUSE Ceruloplasmin OS=Mus musculus OX=10090 GN=Cp PE=1 SV=2
6391200	5392600	5896400	6066400	6860000	4843500	5995600	0.0298683	-0.0116967	Cpd	sp|O89001|CBPD_MOUSE Carboxypeptidase D OS=Mus musculus OX=10090 GN=Cpd PE=1 SV=2
16751000	19909000	12833000	11003000	11262000	8305000	9895900	1.70588	0.705555	Cpe	sp|Q00493|CBPE_MOUSE Carboxypeptidase E OS=Mus musculus OX=10090 GN=Cpe PE=1 SV=2
174660	174660	4992600	174660	12313000	174660	5913700	0.3267	-1.38297	Cpeb2;Cpeb3	sp|Q812E0|CPEB2_MOUSE Cytoplasmic polyadenylation element-binding protein 2 OS=Mus musculus OX=10090 GN=Cpeb2 PE=1 SV=1;sp|Q7TN99|CPEB3_MOUSE Cytoplasmic polyadenylation element-binding protein 3 OS=Mus musculus OX=10090 GN=Cpeb3 PE=1 SV=1
2250500	3770500	2759600	4214400	3972200	1760800	174660	0.122793	0.209926	Cpeb4	sp|Q7TN98|CPEB4_MOUSE Cytoplasmic polyadenylation element-binding protein 4 OS=Mus musculus OX=10090 GN=Cpeb4 PE=1 SV=1
19556000	20566000	23630000	22671000	6258500	15689000	13321000	0.78876	0.552961	Cpn2	sp|Q9DBB9|CPN2_MOUSE Carboxypeptidase N subunit 2 OS=Mus musculus OX=10090 GN=Cpn2 PE=1 SV=2
31053000	25897000	31945000	30731000	29099000	38339000	33580000	0.521121	-0.15258	Cpne1	sp|Q8C166|CPNE1_MOUSE Copine-1 OS=Mus musculus OX=10090 GN=Cpne1 PE=1 SV=1
4035900	2765500	174660	1281700	174660	3978600	174660	0.262954	0.729547	Cpne2	sp|P59108|CPNE2_MOUSE Copine-2 OS=Mus musculus OX=10090 GN=Cpne2 PE=1 SV=1
37730000	33039000	41000000	27622000	26346000	29944000	32124000	1.697	0.360985	Cpne3	sp|Q8BT60|CPNE3_MOUSE Copine-3 OS=Mus musculus OX=10090 GN=Cpne3 PE=1 SV=2
22810000	12938000	18680000	14134000	18317000	18778000	13157000	0.286836	0.172639	Cpox	sp|P36552|HEM6_MOUSE Oxygen-dependent coproporphyrinogen-III oxidase, mitochondrial OS=Mus musculus OX=10090 GN=Cpox PE=1 SV=2
30515000	20157000	13988000	20989000	22921000	20514000	19954000	0.0384064	0.0310441	Cpped1	sp|Q8BFS6|CPPED_MOUSE Serine/threonine-protein phosphatase CPPED1 OS=Mus musculus OX=10090 GN=Cpped1 PE=1 SV=1
35680000	64453000	56903000	72549000	56294000	60590000	57448000	0.498286	-0.237683	Cpq	sp|Q9WVJ3|CBPQ_MOUSE Carboxypeptidase Q OS=Mus musculus OX=10090 GN=Cpq PE=1 SV=1
39276000	28365000	32237000	36679000	44657000	47678000	54743000	1.23494	-0.464523	Cpsf1	sp|Q9EPU4|CPSF1_MOUSE Cleavage and polyadenylation specificity factor subunit 1 OS=Mus musculus OX=10090 GN=Cpsf1 PE=1 SV=1
33503000	23662000	25740000	29260000	22565000	30385000	30623000	0.0596888	-0.0296206	Cpsf2	sp|O35218|CPSF2_MOUSE Cleavage and polyadenylation specificity factor subunit 2 OS=Mus musculus OX=10090 GN=Cpsf2 PE=1 SV=1
51678000	40630000	48882000	51312000	47626000	44718000	52849000	0.233976	-0.0618906	Cpsf3	sp|Q9QXK7|CPSF3_MOUSE Cleavage and polyadenylation specificity factor subunit 3 OS=Mus musculus OX=10090 GN=Cpsf3 PE=1 SV=2
6117100	2595800	6189900	4473500	2331600	6012100	5851400	0.0756418	0.0900072	Cpsf3l	sp|Q9CWS4|INT11_MOUSE Integrator complex subunit 11 OS=Mus musculus OX=10090 GN=Ints11 PE=1 SV=1
6748200	6444900	8589000	5498600	8017200	8185000	7967400	0.0580716	-0.0307369	Cpsf4	sp|Q8BQZ5|CPSF4_MOUSE Cleavage and polyadenylation specificity factor subunit 4 OS=Mus musculus OX=10090 GN=Cpsf4 PE=2 SV=1
71781000	68314000	66104000	60761000	67379000	63866000	76670000	0.136034	0.0332074	Cpsf6	sp|Q6NVF9|CPSF6_MOUSE Cleavage and polyadenylation specificity factor subunit 6 OS=Mus musculus OX=10090 GN=Cpsf6 PE=1 SV=1
58521000	58878000	49268000	60477000	57724000	60623000	58312000	0.625787	-0.0937087	Cpsf7	sp|Q8BTV2|CPSF7_MOUSE Cleavage and polyadenylation specificity factor subunit 7 OS=Mus musculus OX=10090 GN=Cpsf7 PE=1 SV=2
28204000	40266000	47135000	32975000	32740000	33437000	35576000	0.457892	0.194192	Cpt1a	sp|P97742|CPT1A_MOUSE Carnitine O-palmitoyltransferase 1, liver isoform OS=Mus musculus OX=10090 GN=Cpt1a PE=1 SV=4
6371400	1750200	4496000	5558500	7814700	9481900	19968000	0.796519	-1.34791	Cpt1b	sp|Q924X2|CPT1B_MOUSE Carnitine O-palmitoyltransferase 1, muscle isoform OS=Mus musculus OX=10090 GN=Cpt1b PE=1 SV=1
148840000	108570000	118990000	123380000	141650000	166610000	166920000	0.714741	-0.254192	Cpt2	sp|P52825|CPT2_MOUSE Carnitine O-palmitoyltransferase 2, mitochondrial OS=Mus musculus OX=10090 GN=Cpt2 PE=1 SV=2
30787000	28074000	34033000	36953000	174660	32874000	33756000	0.189258	0.255477	Cr1l	sp|Q64735|CR1L_MOUSE Complement component receptor 1-like protein OS=Mus musculus OX=10090 GN=Cr1l PE=1 SV=1
92553000	108760000	101500000	78370000	86639000	94670000	66331000	1.19954	0.308548	Crabp1	sp|P62965|RABP1_MOUSE Cellular retinoic acid-binding protein 1 OS=Mus musculus OX=10090 GN=Crabp1 PE=1 SV=2
174660	7854300	174660	174660	174660	174660	174660	0.544256	3.96868	Cradd	sp|O88843|CRADD_MOUSE Death domain-containing protein CRADD OS=Mus musculus OX=10090 GN=Cradd PE=1 SV=2
1556500	174660	1059000	174660	1293900	1874300	902440	0.0873383	-0.190481	Cramp1l	sp|Q6PG95|CRML_MOUSE Protein cramped-like OS=Mus musculus OX=10090 GN=Cramp1 PE=1 SV=3
57098000	23789000	39421000	52292000	67418000	76272000	92139000	1.26813	-0.844905	Crat	sp|P47934|CACP_MOUSE Carnitine O-acetyltransferase OS=Mus musculus OX=10090 GN=Crat PE=1 SV=3
174660	10383000	5760000	8295200	174660	2647700	174660	0.3276	0.946143	Crcp	sp|O35427|RPC9_MOUSE DNA-directed RNA polymerase III subunit RPC9 OS=Mus musculus OX=10090 GN=Crcp PE=2 SV=1
19651000	20607000	18204000	14871000	12180000	13079000	20452000	0.942425	0.363647	Creb1;Atf1	sp|Q01147|CREB1_MOUSE Cyclic AMP-responsive element-binding protein 1 OS=Mus musculus OX=10090 GN=Creb1 PE=1 SV=2;sp|P81269|ATF1_MOUSE Cyclic AMP-dependent transcription factor ATF-1 OS=Mus musculus OX=10090 GN=Atf1 PE=1 SV=1
174660	174660	174660	174660	13471000	174660	12784000	0.691695	-5.25097	Creb3	sp|Q61817|CREB3_MOUSE Cyclic AMP-responsive element-binding protein 3 OS=Mus musculus OX=10090 GN=Creb3 PE=2 SV=2
13569000	12826000	19121000	17549000	15469000	14421000	18929000	0.284542	-0.129077	Crebbp	sp|P45481|CBP_MOUSE Histone lysine acetyltransferase CREBBP OS=Mus musculus OX=10090 GN=Crebbp PE=1 SV=3
5351000	11555000	12609000	9991600	10608000	7677300	8307600	0.124465	0.105253	Creg1	sp|O88668|CREG1_MOUSE Protein CREG1 OS=Mus musculus OX=10090 GN=Creg1 PE=1 SV=1
174660	174660	4605800	4877800	8801300	7321900	9841100	1.72219	-2.22287	Creg2	sp|Q8BGC9|CREG2_MOUSE Protein CREG2 OS=Mus musculus OX=10090 GN=Creg2 PE=1 SV=1
45271000	44577000	49493000	47348000	68735000	57115000	63905000	1.144	-0.351857	Creld2	sp|Q9CYA0|CREL2_MOUSE Protein disulfide isomerase Creld2 OS=Mus musculus OX=10090 GN=Creld2 PE=1 SV=1
19196000	5221900	10675000	12028000	22445000	41704000	51813000	0.886778	-1.45174	Crem	sp|P27699|CREM_MOUSE cAMP-responsive element modulator OS=Mus musculus OX=10090 GN=Crem PE=1 SV=2
37209000	38395000	18751000	58349000	21894000	25261000	40505000	0.173285	-0.214849	Crip1	sp|P63254|CRIP1_MOUSE Cysteine-rich protein 1 OS=Mus musculus OX=10090 GN=Crip1 PE=1 SV=2
31937000	33621000	40901000	53724000	42513000	40065000	38224000	0.839882	-0.298107	Crip2	sp|Q9DCT8|CRIP2_MOUSE Cysteine-rich protein 2 OS=Mus musculus OX=10090 GN=Crip2 PE=1 SV=1
6012400	32491000	24513000	6805900	174660	174660	50511000	0.158846	0.543038	Crisp1	sp|Q03401|CRIS1_MOUSE Cysteine-rich secretory protein 1 OS=Mus musculus OX=10090 GN=Crisp1 PE=2 SV=1
40254000	61392000	49095000	40297000	45526000	38313000	35993000	0.882261	0.327875	Crk	sp|Q64010|CRK_MOUSE Adapter molecule crk OS=Mus musculus OX=10090 GN=Crk PE=1 SV=1
16308000	17666000	20511000	17404000	17981000	17731000	15258000	0.357317	0.0874488	Crkl	sp|P47941|CRKL_MOUSE Crk-like protein OS=Mus musculus OX=10090 GN=Crkl PE=1 SV=2
43317000	35375000	33091000	37011000	21551000	31596000	30704000	0.730903	0.302378	Crlf3	sp|Q9Z2L7|CRLF3_MOUSE Cytokine receptor-like factor 3 OS=Mus musculus OX=10090 GN=Crlf3 PE=1 SV=1
174660	174660	3470500	3236800	174660	4124700	5207900	0.554406	-1.32321	Crls1	sp|Q80ZM8|CRLS1_MOUSE Cardiolipin synthase (CMP-forming) OS=Mus musculus OX=10090 GN=Crls1 PE=1 SV=1
174660	174660	174660	174660	174660	174660	174660	#DIV/0!	0	Crmp1	sp|P97427|DPYL1_MOUSE Dihydropyrimidinase-related protein 1 OS=Mus musculus OX=10090 GN=Crmp1 PE=1 SV=1
26067000	27209000	24894000	23987000	26475000	24733000	33045000	0.151758	-0.0545093	Crnkl1	sp|P63154|CRNL1_MOUSE Crooked neck-like protein 1 OS=Mus musculus OX=10090 GN=Crnkl1 PE=1 SV=1
22849000	23609000	22537000	25783000	18795000	23823000	23429000	0.007668	0.00256377	Crocc	sp|Q8CJ40|CROCC_MOUSE Rootletin OS=Mus musculus OX=10090 GN=Crocc PE=1 SV=2
17013000	24239000	22947000	24487000	23879000	15536000	16672000	0.14115	0.0872739	Crot	sp|Q9DC50|OCTC_MOUSE Peroxisomal carnitine O-octanoyltransferase OS=Mus musculus OX=10090 GN=Crot PE=1 SV=1
7080900	8876000	3603800	8916800	6884700	8065200	7878900	0.45144	-0.283561	Crtap	sp|Q9CYD3|CRTAP_MOUSE Cartilage-associated protein OS=Mus musculus OX=10090 GN=Crtap PE=1 SV=3
15377000	19034000	12982000	13025000	11549000	9045100	2823800	1.10044	0.794074	Crtc1	sp|Q68ED7|CRTC1_MOUSE CREB-regulated transcription coactivator 1 OS=Mus musculus OX=10090 GN=Crtc1 PE=1 SV=1
21793000	28542000	32253000	17148000	24169000	21967000	24372000	0.842224	0.329117	Crtc3	sp|Q91X84|CRTC3_MOUSE CREB-regulated transcription coactivator 3 OS=Mus musculus OX=10090 GN=Crtc3 PE=1 SV=2
174660	1126300	174660	1151300	174660	174660	174660	0.0657076	0.231957	Crybg1	tr|A0A0G2JG52|A0A0G2JG52_MOUSE Crystallin beta-gamma domain-containing 1 OS=Mus musculus OX=10090 GN=Crybg1 PE=1 SV=1
25577000	5790600	21548000	29311000	42382000	45311000	58087000	1.53714	-1.3113	Crybg3	sp|Q80W49|CRBG3_MOUSE Beta/gamma crystallin domain-containing protein 3 OS=Mus musculus OX=10090 GN=Crybg3 PE=1 SV=2
16412000	16207000	28058000	16154000	15894000	18913000	14243000	0.509314	0.311227	Cryl1	sp|Q99KP3|CRYL1_MOUSE Lambda-crystallin homolog OS=Mus musculus OX=10090 GN=Cryl1 PE=1 SV=3
96500000	102270000	105820000	80819000	110330000	84768000	77463000	0.68076	0.200686	Cryz	sp|P47199|QOR_MOUSE Quinone oxidoreductase OS=Mus musculus OX=10090 GN=Cryz PE=1 SV=1
71787000	50668000	63947000	65580000	58376000	93907000	70558000	0.4157	-0.214721	Cryzl1	sp|Q921W4|QORL1_MOUSE Quinone oxidoreductase-like protein 1 OS=Mus musculus OX=10090 GN=Cryzl1 PE=1 SV=1
403080000	384850000	403970000	320230000	352880000	461840000	472790000	0.0347017	-0.0167334	Cs	sp|Q9CZU6|CISY_MOUSE Citrate synthase, mitochondrial OS=Mus musculus OX=10090 GN=Cs PE=1 SV=1
11361000	13825000	11567000	8266900	174660	5061800	174660	1.81802	1.84104	Csdc2	sp|Q91YQ3|CSDC2_MOUSE Cold shock domain-containing protein C2 OS=Mus musculus OX=10090 GN=Csdc2 PE=1 SV=2
61936000	53470000	59561000	60865000	65708000	65088000	57869000	0.621244	-0.0970929	Csde1	sp|Q91W50|CSDE1_MOUSE Cold shock domain-containing protein E1 OS=Mus musculus OX=10090 GN=Csde1 PE=1 SV=1
1562900000	1199400000	1201100000	1335700000	1327500000	1402000000	1790600000	0.370349	-0.14809	Cse1l	sp|Q9ERK4|XPO2_MOUSE Exportin-2 OS=Mus musculus OX=10090 GN=Cse1l PE=1 SV=1
27643000	38063000	26175000	28283000	24783000	24519000	20892000	0.805611	0.315017	Csk	sp|P41241|CSK_MOUSE Tyrosine-protein kinase CSK OS=Mus musculus OX=10090 GN=Csk PE=1 SV=2
227360000	203970000	188330000	218640000	254320000	284520000	279530000	1.32165	-0.327844	Csl	tr|Q80X68|Q80X68_MOUSE Citrate synthase OS=Mus musculus OX=10090 GN=Csl PE=1 SV=1
35066000	32921000	40578000	31534000	41879000	50419000	37878000	0.356901	-0.159812	Csnk1a1	sp|Q8BK63|KC1A_MOUSE Casein kinase I isoform alpha OS=Mus musculus OX=10090 GN=Csnk1a1 PE=1 SV=2
24293000	30802000	33944000	17417000	26546000	33352000	35528000	0.0993092	0.0732299	Csnk1d	sp|Q9DC28|KC1D_MOUSE Casein kinase I isoform delta OS=Mus musculus OX=10090 GN=Csnk1d PE=1 SV=2
3537500	2921900	1769900	2657500	1845700	1987700	174660	0.665883	0.719081	Csnk1g1;Csnk1g3	sp|Q8BTH8|KC1G1_MOUSE Casein kinase I isoform gamma-1 OS=Mus musculus OX=10090 GN=Csnk1g1 PE=1 SV=2;sp|Q8C4X2|KC1G3_MOUSE Casein kinase I isoform gamma-3 OS=Mus musculus OX=10090 GN=Csnk1g3 PE=1 SV=2
184470000	155560000	158220000	156890000	163020000	150210000	167520000	0.311953	0.0591652	Csnk2a1	sp|Q60737|CSK21_MOUSE Casein kinase II subunit alpha OS=Mus musculus OX=10090 GN=Csnk2a1 PE=1 SV=2
90836000	64089000	76636000	82151000	89395000	102090000	98934000	0.934173	-0.271082	Csnk2a2	sp|O54833|CSK22_MOUSE Casein kinase II subunit alpha OS=Mus musculus OX=10090 GN=Csnk2a2 PE=1 SV=1
86674000	84552000	121090000	92049000	125820000	104490000	111450000	0.362729	-0.154494	Csnk2b	sp|P67871|CSK2B_MOUSE Casein kinase II subunit beta OS=Mus musculus OX=10090 GN=Csnk2b PE=1 SV=1
8070000	9817100	11898000	8342600	8950700	9923600	12874000	0.0211399	-0.0136465	Cspg4	sp|Q8VHY0|CSPG4_MOUSE Chondroitin sulfate proteoglycan 4 OS=Mus musculus OX=10090 GN=Cspg4 PE=1 SV=3
17140000	17521000	17500000	14170000	11800000	15931000	12565000	1.74518	0.352653	Cspp1	sp|B2RX88|CSPP1_MOUSE Centrosome and spindle pole associated protein 1 OS=Mus musculus OX=10090 GN=Cspp1 PE=1 SV=2
205490000	251760000	228530000	281070000	251170000	214920000	347240000	0.593941	-0.259285	Csrp1	sp|P97315|CSRP1_MOUSE Cysteine and glycine-rich protein 1 OS=Mus musculus OX=10090 GN=Csrp1 PE=1 SV=3
174660	9012400	5599200	7684900	174660	9145400	7828100	0.149625	-0.332967	Csrp2	sp|P97314|CSRP2_MOUSE Cysteine and glycine-rich protein 2 OS=Mus musculus OX=10090 GN=Csrp2 PE=1 SV=3
19078000	174660	5321600	9770700	174660	9262700	174660	0.234567	0.757414	Cst12	sp|Q9DAN8|CST12_MOUSE Cystatin-12 OS=Mus musculus OX=10090 GN=Cst12 PE=1 SV=1
25678000	48402000	36605000	30452000	30842000	32223000	20122000	0.615189	0.377039	Cst3	sp|P21460|CYTC_MOUSE Cystatin-C OS=Mus musculus OX=10090 GN=Cst3 PE=1 SV=2
11554000	17451000	16112000	13016000	18360000	22725000	21675000	0.60616	-0.333032	Cst9	sp|Q9Z0H6|CST9_MOUSE Cystatin-9 OS=Mus musculus OX=10090 GN=Cst9 PE=2 SV=1
151210000	176590000	176870000	153580000	146970000	153040000	183760000	0.304568	0.078292	Cstb	sp|Q62426|CYTB_MOUSE Cystatin-B OS=Mus musculus OX=10090 GN=Cstb PE=1 SV=1
33177000	22372000	24333000	26030000	33082000	25435000	26676000	0.125484	-0.0624753	Cstf1	sp|Q99LC2|CSTF1_MOUSE Cleavage stimulation factor subunit 1 OS=Mus musculus OX=10090 GN=Cstf1 PE=1 SV=1
39396000	57195000	40085000	27266000	33990000	34066000	39278000	1.04606	0.437119	Cstf2	sp|Q8BIQ5|CSTF2_MOUSE Cleavage stimulation factor subunit 2 OS=Mus musculus OX=10090 GN=Cstf2 PE=1 SV=2
65403000	49501000	46764000	65939000	79855000	79300000	112250000	1.21676	-0.646149	Cstf2t	sp|Q8C7E9|CSTFT_MOUSE Cleavage stimulation factor subunit 2 tau variant OS=Mus musculus OX=10090 GN=Cstf2t PE=1 SV=2
39165000	26410000	33432000	33170000	41266000	38579000	43307000	0.716282	-0.243881	Cstf3	sp|Q99LI7|CSTF3_MOUSE Cleavage stimulation factor subunit 3 OS=Mus musculus OX=10090 GN=Cstf3 PE=1 SV=1
97752000	80531000	98625000	94756000	70123000	70121000	55303000	0.889594	0.346885	Ctbp1	sp|O88712|CTBP1_MOUSE C-terminal-binding protein 1 OS=Mus musculus OX=10090 GN=Ctbp1 PE=1 SV=2
18222000	20638000	21685000	15974000	17294000	25313000	30987000	0.203169	-0.149938	Ctbp2	sp|P56546|CTBP2_MOUSE C-terminal-binding protein 2 OS=Mus musculus OX=10090 GN=Ctbp2 PE=1 SV=2
5825800	5400300	4755000	9330200	3018900	6595100	174660	0.0820652	0.156408	Ctbs	sp|Q8R242|DIAC_MOUSE Di-N-acetylchitobiase OS=Mus musculus OX=10090 GN=Ctbs PE=1 SV=2
29753000	18845000	32196000	29744000	19605000	38126000	39128000	0.308057	-0.232954	Ctc1	sp|Q5SUQ9|CTC1_MOUSE CST complex subunit CTC1 OS=Mus musculus OX=10090 GN=Ctc1 PE=1 SV=2
12245000	10091000	9870700	11523000	12409000	15140000	17106000	1.00159	-0.387607	Ctdp1	sp|Q7TSG2|CTDP1_MOUSE RNA polymerase II subunit A C-terminal domain phosphatase OS=Mus musculus OX=10090 GN=Ctdp1 PE=1 SV=1
9453200	4355800	6905700	7813800	8391000	5742800	10866000	0.308018	-0.248601	Ctdspl2	sp|Q8BG15|CTSL2_MOUSE CTD small phosphatase-like protein 2 OS=Mus musculus OX=10090 GN=Ctdspl2 PE=1 SV=1
41605000	54563000	53359000	40253000	38238000	37173000	39142000	1.59238	0.364982	Ctnna1	sp|P26231|CTNA1_MOUSE Catenin alpha-1 OS=Mus musculus OX=10090 GN=Ctnna1 PE=1 SV=1
31600000	28070000	26032000	28657000	25026000	25119000	25537000	0.689152	0.13116	Ctnna2	sp|Q61301|CTNA2_MOUSE Catenin alpha-2 OS=Mus musculus OX=10090 GN=Ctnna2 PE=1 SV=3
5838400	3759200	5968900	5003700	1217700	6988100	14035000	0.195461	-0.392483	Ctnna3	sp|Q65CL1|CTNA3_MOUSE Catenin alpha-3 OS=Mus musculus OX=10090 GN=Ctnna3 PE=1 SV=2
5521900	6445900	5382300	3078600	3136400	1396600	3699000	2.20965	1.03231	Ctnnal1	sp|O88327|CTNL1_MOUSE Alpha-catulin OS=Mus musculus OX=10090 GN=Ctnnal1 PE=1 SV=1
60437000	66029000	56006000	49431000	57575000	48394000	56184000	1.08014	0.201482	Ctnnb1	sp|Q02248|CTNB1_MOUSE Catenin beta-1 OS=Mus musculus OX=10090 GN=Ctnnb1 PE=1 SV=1
22796000	22291000	18641000	19201000	25841000	22403000	22621000	0.266817	-0.0840177	Ctnnbl1	sp|Q9CWL8|CTBL1_MOUSE Beta-catenin-like protein 1 OS=Mus musculus OX=10090 GN=Ctnnbl1 PE=1 SV=1
51696000	53726000	51990000	44703000	45088000	53112000	59867000	0.156484	0.0497388	Ctnnd1	sp|P30999|CTND1_MOUSE Catenin delta-1 OS=Mus musculus OX=10090 GN=Ctnnd1 PE=1 SV=2
67571000	61193000	66053000	57347000	74018000	61347000	61216000	0.117067	0.0327376	Ctps1	sp|P70698|PYRG1_MOUSE CTP synthase 1 OS=Mus musculus OX=10090 GN=Ctps1 PE=1 SV=2
4069400	3092100	4644800	2474000	4385000	5212500	4551100	0.101118	-0.0785517	Ctps2	sp|P70303|PYRG2_MOUSE CTP synthase 2 OS=Mus musculus OX=10090 GN=Ctps2 PE=1 SV=1
25658000	24238000	22998000	20010000	20426000	27915000	24646000	0.174693	0.0636534	Ctr9	sp|Q62018|CTR9_MOUSE RNA polymerase-associated protein CTR9 homolog OS=Mus musculus OX=10090 GN=Ctr9 PE=1 SV=2
12545000	9555600	10483000	12107000	16227000	11347000	9064300	0.284009	-0.16608	Ctsa	sp|P16675|PPGB_MOUSE Lysosomal protective protein OS=Mus musculus OX=10090 GN=Ctsa PE=1 SV=1
37080000	38920000	39197000	33621000	31266000	32437000	31048000	3.04917	0.25881	Ctsb	sp|P10605|CATB_MOUSE Cathepsin B OS=Mus musculus OX=10090 GN=Ctsb PE=1 SV=2
174660	6652100	2952600	174660	11838000	174660	174660	0.014976	0.0769396	Ctsc	sp|P97821|CATC_MOUSE Dipeptidyl peptidase 1 OS=Mus musculus OX=10090 GN=Ctsc PE=1 SV=1
123930000	158460000	139420000	116410000	87745000	143300000	56961000	0.81288	0.475791	Ctsd	sp|P18242|CATD_MOUSE Cathepsin D OS=Mus musculus OX=10090 GN=Ctsd PE=1 SV=1
5169400	8351900	174660	9787100	6563600	5159800	2521900	0.212475	-0.396193	Ctsh	sp|P49935|CATH_MOUSE Pro-cathepsin H OS=Mus musculus OX=10090 GN=Ctsh PE=1 SV=2
25938000	38470000	26331000	21206000	22629000	27193000	18205000	0.95823	0.439183	Ctsl	sp|P06797|CATL1_MOUSE Procathepsin L OS=Mus musculus OX=10090 GN=Ctsl PE=1 SV=2
36782000	44468000	28247000	48539000	33388000	30177000	42570000	0.127235	-0.0833019	Ctsz	sp|Q9WUU7|CATZ_MOUSE Cathepsin Z OS=Mus musculus OX=10090 GN=Ctsz PE=1 SV=1
157840000	169920000	138890000	142870000	148640000	110890000	91401000	0.887699	0.333449	Cttn	sp|Q60598|SRC8_MOUSE Src substrate cortactin OS=Mus musculus OX=10090 GN=Cttn PE=1 SV=2
174660	11631000	7555300	11358000	4424600	174660	7976800	0.040579	0.109123	Ctu1	sp|Q99J10|CTU1_MOUSE Cytoplasmic tRNA 2-thiolation protein 1 OS=Mus musculus OX=10090 GN=Ctu1 PE=2 SV=1
10738000	8512600	10401000	6254200	12615000	8872200	9355200	0.138573	0.0918605	Ctu2	sp|Q3U308|CTU2_MOUSE Cytoplasmic tRNA 2-thiolation protein 2 OS=Mus musculus OX=10090 GN=Ctu2 PE=1 SV=1
42423000	36101000	44255000	38147000	45902000	47708000	39877000	0.230842	-0.068234	Cul1	sp|Q9WTX6|CUL1_MOUSE Cullin-1 OS=Mus musculus OX=10090 GN=Cul1 PE=1 SV=1
35435000	25194000	34035000	26895000	30926000	37647000	42597000	0.241323	-0.129422	Cul2	sp|Q9D4H8|CUL2_MOUSE Cullin-2 OS=Mus musculus OX=10090 GN=Cul2 PE=1 SV=2
145650000	120380000	110870000	126970000	136820000	169200000	169950000	0.767206	-0.262795	Cul3	sp|Q9JLV5|CUL3_MOUSE Cullin-3 OS=Mus musculus OX=10090 GN=Cul3 PE=1 SV=1
38264000	24899000	25460000	27904000	39455000	34736000	34017000	0.42643	-0.204004	Cul4a	sp|Q3TCH7|CUL4A_MOUSE Cullin-4A OS=Mus musculus OX=10090 GN=Cul4a PE=1 SV=1
53225000	74365000	61775000	47041000	53912000	48171000	51803000	1.18649	0.329536	Cul4b	sp|A2A432|CUL4B_MOUSE Cullin-4B OS=Mus musculus OX=10090 GN=Cul4b PE=1 SV=1
46236000	35001000	45441000	38077000	45634000	46101000	56168000	0.337338	-0.138944	Cul5	sp|Q9D5V5|CUL5_MOUSE Cullin-5 OS=Mus musculus OX=10090 GN=Cul5 PE=1 SV=3
4139900	6818800	7926300	4886800	4069000	4828400	4781800	0.829379	0.439615	Cul7	sp|Q8VE73|CUL7_MOUSE Cullin-7 OS=Mus musculus OX=10090 GN=Cul7 PE=1 SV=2
23990000	18258000	16791000	20849000	24992000	31656000	38466000	0.930291	-0.558887	Cul9	sp|Q80TT8|CUL9_MOUSE Cullin-9 OS=Mus musculus OX=10090 GN=Cul9 PE=1 SV=2
30054000	22182000	24915000	26896000	12337000	23762000	25953000	0.330511	0.20976	Cuta	sp|Q9CQ89|CUTA_MOUSE Protein CutA OS=Mus musculus OX=10090 GN=Cuta PE=1 SV=3
17611000	15962000	15253000	17421000	10370000	20327000	26356000	0.235947	-0.19405	Cutc	sp|Q9D8X1|CUTC_MOUSE Copper homeostasis protein cutC homolog OS=Mus musculus OX=10090 GN=Cutc PE=1 SV=1
61920000	78225000	51151000	65823000	57551000	32743000	39165000	0.615912	0.385285	Cux1	sp|P53564|CUX1_MOUSE Homeobox protein cut-like 1 OS=Mus musculus OX=10090 GN=Cux1 PE=1 SV=3
174660	5890300	174660	4834200	174660	174660	174660	0.130963	0.634753	Cuzd1	sp|P70412|CUZD1_MOUSE CUB and zona pellucida-like domain-containing protein 1 OS=Mus musculus OX=10090 GN=Cuzd1 PE=1 SV=2
60919000	52620000	67689000	72124000	61118000	56264000	51026000	0.0143557	0.00661453	Cwc15	sp|Q9JHS9|CWC15_MOUSE Spliceosome-associated protein CWC15 homolog OS=Mus musculus OX=10090 GN=Cwc15 PE=1 SV=1
33536000	42104000	39173000	35927000	24973000	31440000	22656000	1.15141	0.41274	Cwc22	sp|Q8C5N3|CWC22_MOUSE Pre-mRNA-splicing factor CWC22 homolog OS=Mus musculus OX=10090 GN=Cwc22 PE=1 SV=1
32456000	17897000	25982000	24467000	16934000	174660	174660	0.915524	1.28559	Cwc25	sp|Q9DBF7|CWC25_MOUSE Pre-mRNA-splicing factor CWC25 homolog OS=Mus musculus OX=10090 GN=Cwc25 PE=2 SV=2
40808000	38190000	40755000	42008000	31975000	28426000	30100000	0.906105	0.269009	Cwc27	sp|Q3TKY6|CWC27_MOUSE Spliceosome-associated protein CWC27 homolog OS=Mus musculus OX=10090 GN=Cwc27 PE=1 SV=1
16665000	13498000	14219000	13042000	17231000	20733000	17935000	0.543712	-0.22035	Cwf19l1	sp|Q8CI33|C19L1_MOUSE CWF19-like protein 1 OS=Mus musculus OX=10090 GN=Cwf19l1 PE=1 SV=2
98757000	53961000	68098000	76925000	54831000	72144000	60509000	0.238487	0.155111	Cwf19l2	sp|Q8BG79|C19L2_MOUSE CWF19-like protein 2 OS=Mus musculus OX=10090 GN=Cwf19l2 PE=1 SV=1
12943000	18199000	18851000	174660	19365000	13596000	174660	0.657338	1.00079	Cxadr	sp|P97792|CXAR_MOUSE Coxsackievirus and adenovirus receptor homolog OS=Mus musculus OX=10090 GN=Cxadr PE=1 SV=1
174660	1533900	174660	1976100	174660	12029000	174660	0.374555	-2.51518	Cxcl5	sp|P50228|CXCL5_MOUSE C-X-C motif chemokine 5 OS=Mus musculus OX=10090 GN=Cxcl5 PE=1 SV=2
7066700	6993500	9965300	8289100	6981200	174660	5067100	0.588096	0.643132	Cxxc1	sp|Q9CWW7|CXXC1_MOUSE CXXC-type zinc finger protein 1 OS=Mus musculus OX=10090 GN=Cxxc1 PE=1 SV=1
11174000	6020100	16343000	10916000	14732000	24510000	21937000	0.727975	-0.689104	Cyb561d2	sp|Q9WUE3|C56D2_MOUSE Cytochrome b561 domain-containing protein 2 OS=Mus musculus OX=10090 GN=Cyb561d2 PE=1 SV=1
177680000	192260000	231680000	175960000	214810000	156540000	137410000	0.566076	0.228376	Cyb5a	sp|P56395|CYB5_MOUSE Cytochrome b5 OS=Mus musculus OX=10090 GN=Cyb5a PE=1 SV=2
61360000	82194000	61491000	74581000	65842000	122500000	157820000	0.662879	-0.621961	Cyb5b	sp|Q9CQX2|CYB5B_MOUSE Cytochrome b5 type B OS=Mus musculus OX=10090 GN=Cyb5b PE=1 SV=1
38724000	30023000	13955000	33870000	38302000	30892000	43312000	0.609887	-0.408647	Cyb5r1	sp|Q9DB73|NB5R1_MOUSE NADH-cytochrome b5 reductase 1 OS=Mus musculus OX=10090 GN=Cyb5r1 PE=1 SV=1
184790000	190380000	199730000	194310000	204120000	219040000	237420000	0.929561	-0.15739	Cyb5r3	sp|Q9DCN2|NB5R3_MOUSE NADH-cytochrome b5 reductase 3 OS=Mus musculus OX=10090 GN=Cyb5r3 PE=1 SV=3
255350000	218830000	224010000	253720000	262160000	276850000	237150000	0.88453	-0.145747	Cyc1	sp|Q9D0M3|CY1_MOUSE Cytochrome c1, heme protein, mitochondrial OS=Mus musculus OX=10090 GN=Cyc1 PE=1 SV=1
450880000	536780000	548390000	501920000	414050000	412380000	406490000	1.0474	0.23946	Cycs	sp|P62897|CYC_MOUSE Cytochrome c, somatic OS=Mus musculus OX=10090 GN=Cycs PE=1 SV=2
109470000	46297000	68401000	114600000	126940000	124170000	134820000	1.57174	-0.743839	Cyct	sp|P00015|CYC2_MOUSE Cytochrome c, testis-specific OS=Mus musculus OX=10090 GN=Cyct PE=1 SV=3
56302000	47871000	39360000	40361000	41044000	41949000	55624000	0.20471	0.0966377	Cyfip1;Cyfip2	sp|Q7TMB8|CYFP1_MOUSE Cytoplasmic FMR1-interacting protein 1 OS=Mus musculus OX=10090 GN=Cyfip1 PE=1 SV=1;sp|Q5SQX6|CYFP2_MOUSE Cytoplasmic FMR1-interacting protein 2 OS=Mus musculus OX=10090 GN=Cyfip2 PE=1 SV=2
174660	174660	174660	174660	3569200	174660	174660	0.359928	-2.5506	Cyhr1	sp|Q9QXA1|CYHR1_MOUSE Cysteine and histidine-rich protein 1 OS=Mus musculus OX=10090 GN=Cyhr1 PE=1 SV=1
8652900	16637000	174660	6943400	174660	174660	2198800	0.650717	1.83882	Cyld	sp|Q80TQ2|CYLD_MOUSE Ubiquitin carboxyl-terminal hydrolase CYLD OS=Mus musculus OX=10090 GN=Cyld PE=1 SV=2
58242000	59435000	55746000	109980000	112210000	163630000	163100000	2.17	-1.24726	Cyp11a1	sp|Q9QZ82|CP11A_MOUSE Cholesterol side-chain cleavage enzyme, mitochondrial OS=Mus musculus OX=10090 GN=Cyp11a1 PE=1 SV=1
25700000	20081000	70501000	264030000	262490000	429520000	377110000	2.65019	-3.1041	Cyp17a1	sp|P27786|CP17A_MOUSE Steroid 17-alpha-hydroxylase/17,20 lyase OS=Mus musculus OX=10090 GN=Cyp17a1 PE=1 SV=1
33880000	38423000	27472000	45765000	25564000	27344000	36012000	0.022925	-0.0178014	Cyp20a1	sp|Q8BKE6|CP20A_MOUSE Cytochrome P450 20A1 OS=Mus musculus OX=10090 GN=Cyp20a1 PE=1 SV=1
11490000	9099400	11751000	5373500	10173000	6991900	5856200	1.27573	0.602758	Cyp26b1	sp|Q811W2|CP26B_MOUSE Cytochrome P450 26B1 OS=Mus musculus OX=10090 GN=Cyp26b1 PE=1 SV=1
9728000	11885000	6022700	9034800	9069300	10808000	5833600	0.10144	0.0847362	Cyp27a1	sp|Q9DBG1|CP27A_MOUSE Sterol 26-hydroxylase, mitochondrial OS=Mus musculus OX=10090 GN=Cyp27a1 PE=1 SV=1
9526000	9027000	11790000	16226000	11756000	12972000	14204000	1.39741	-0.447169	Cyp2d22	tr|Q9JKY7|Q9JKY7_MOUSE Cytochrome P450 CYP2D22 OS=Mus musculus OX=10090 GN=Cyp2d22 PE=1 SV=1
21473000	17955000	14877000	11359000	11290000	12434000	9133800	1.957	0.711528	Cyp2s1	sp|Q9DBX6|CP2S1_MOUSE Cytochrome P450 2S1 OS=Mus musculus OX=10090 GN=Cyp2s1 PE=1 SV=1
174660	174660	174660	174660	174660	174660	174660	#DIV/0!	0	Cyp46a1	sp|Q9WVK8|CP46A_MOUSE Cholesterol 24-hydroxylase OS=Mus musculus OX=10090 GN=Cyp46a1 PE=1 SV=1
15766000	18858000	10405000	26227000	21081000	34336000	18925000	1.11663	-0.744222	Cyp51a1	sp|Q8K0C4|CP51A_MOUSE Lanosterol 14-alpha demethylase OS=Mus musculus OX=10090 GN=Cyp51a1 PE=1 SV=1
174660	174660	174660	174660	174660	174660	1461200	0.359928	-1.50665	Cypt12	tr|Q9DAR6|Q9DAR6_MOUSE Cysteine-rich perinuclear theca 12 OS=Mus musculus OX=10090 GN=Cypt12 PE=2 SV=1
2822800	174660	174660	174660	3155600	174660	4753200	0.266699	-0.965329	Cystm1	sp|Q8K353|CYTM1_MOUSE Cysteine-rich and transmembrane domain-containing protein 1 OS=Mus musculus OX=10090 GN=Cystm1 PE=1 SV=1
4514500	3269800	3889800	174660	174660	6347300	6558900	0.096683	0.231756	Cyth1	sp|Q9QX11|CYH1_MOUSE Cytohesin-1 OS=Mus musculus OX=10090 GN=Cyth1 PE=1 SV=2
24259000	26041000	24682000	33003000	27346000	40637000	36900000	1.41759	-0.463822	Cyth2	sp|P63034|CYH2_MOUSE Cytohesin-2 OS=Mus musculus OX=10090 GN=Cyth2 PE=1 SV=2
174660	174660	174660	174660	174660	174660	1986700	0.359928	-1.84546	Cytip	sp|Q91VY6|CYTIP_MOUSE Cytohesin-interacting protein OS=Mus musculus OX=10090 GN=Cytip PE=1 SV=1
127710000	124330000	103610000	115440000	109700000	131040000	125660000	0.0802627	-0.0230585	D10Jhu81e	sp|Q9D172|GAL3A_MOUSE Glutamine amidotransferase-like class 1 domain-containing protein 3A, mitochondrial OS=Mus musculus OX=10090 GN=Gatd3a PE=1 SV=1
5453000	5768600	12829000	7734400	5023300	7857200	2579100	0.380701	0.467359	D10Wsu102e	sp|Q9CX66|CL045_MOUSE Uncharacterized protein C12orf45 homolog OS=Mus musculus OX=10090 GN=D10Wsu102e PE=1 SV=1
277990	1318400	1679700	1769300	3277500	2302400	3094900	1.41499	-1.2576	D11Wsu47e	sp|Q6PIX9|CQ080_MOUSE Uncharacterized protein C17orf80 homolog OS=Mus musculus OX=10090 GN=D11Wsu47e PE=2 SV=3
174660	174660	2443600	174660	2544600	2910200	3627100	0.585935	-1.31366	D17h6s53e	sp|Q9Z1R4|CF047_MOUSE Uncharacterized protein C6orf47 homolog OS=Mus musculus OX=10090 GN=D17h6s53e PE=1 SV=1
146620000	127390000	141930000	159170000	182590000	153090000	207540000	1.20556	-0.340859	D1Pas1	sp|P16381|DDX3L_MOUSE Putative ATP-dependent RNA helicase Pl10 OS=Mus musculus OX=10090 GN=D1Pas1 PE=1 SV=1
1763300	174660	4557200	2754200	174660	10929000	8270900	0.483668	-1.35345	D2hgdh	sp|Q8CIM3|D2HDH_MOUSE D-2-hydroxyglutarate dehydrogenase, mitochondrial OS=Mus musculus OX=10090 GN=D2hgdh PE=1 SV=3
56658000	39700000	49188000	34821000	27464000	40172000	20546000	1.38079	0.657819	D8Ertd738e	sp|Q8R1F0|L10K_MOUSE Leydig cell tumor 10 kDa protein homolog OS=Mus musculus OX=10090 GN=D8Ertd738e PE=3 SV=1
16261000	22150000	29792000	61348000	16370000	22663000	17006000	0.196299	-0.368328	Daam2	sp|Q80U19|DAAM2_MOUSE Disheveled-associated activator of morphogenesis 2 OS=Mus musculus OX=10090 GN=Daam2 PE=1 SV=4
26287000	52897000	34374000	48877000	34398000	31602000	22970000	0.138707	0.135399	Dab2	sp|P98078|DAB2_MOUSE Disabled homolog 2 OS=Mus musculus OX=10090 GN=Dab2 PE=1 SV=2
8099400	6322800	174660	7711600	174660	174660	174660	0.406078	1.24075	Dab2ip	sp|Q3UHC7|DAB2P_MOUSE Disabled homolog 2-interacting protein OS=Mus musculus OX=10090 GN=Dab2ip PE=1 SV=1
72604000	51325000	57295000	63794000	64033000	93650000	119760000	0.70357	-0.497963	Dad1	sp|P61804|DAD1_MOUSE Dolichyl-diphosphooligosaccharide--protein glycosyltransferase subunit DAD1 OS=Mus musculus OX=10090 GN=Dad1 PE=1 SV=3
21385000	23073000	22115000	17336000	17304000	18242000	25813000	0.450103	0.173703	Dag1	sp|Q62165|DAG1_MOUSE Dystroglycan OS=Mus musculus OX=10090 GN=Dag1 PE=1 SV=4
213560000	129490000	153640000	259350000	313720000	281480000	319950000	2.30151	-0.826592	Dak	sp|Q8VC30|TKFC_MOUSE Triokinase/FMN cyclase OS=Mus musculus OX=10090 GN=Tkfc PE=1 SV=1
174660	174660	174660	174660	174660	174660	3997400	0.359928	-2.69414	Dalrd3	sp|Q6PJN8|DALD3_MOUSE DALR anticodon-binding domain-containing protein 3 OS=Mus musculus OX=10090 GN=Dalrd3 PE=2 SV=1
34783000	27841000	31153000	61473000	34763000	44534000	20240000	0.370754	-0.364807	Dap	sp|Q91XC8|DAP1_MOUSE Death-associated protein 1 OS=Mus musculus OX=10090 GN=Dap PE=1 SV=3
22558000	26489000	21151000	19583000	24305000	28751000	30229000	0.306655	-0.136255	Dap3	sp|Q9ER88|RT29_MOUSE 28S ribosomal protein S29, mitochondrial OS=Mus musculus OX=10090 GN=Dap3 PE=1 SV=1
174660	174660	174660	1735300	174660	174660	2418900	0.667198	-2.68843	Dapk3	sp|O54784|DAPK3_MOUSE Death-associated protein kinase 3 OS=Mus musculus OX=10090 GN=Dapk3 PE=1 SV=1
228670000	167210000	204110000	226310000	267880000	306860000	335240000	1.34091	-0.506283	Dars	sp|Q922B2|SYDC_MOUSE Aspartate--tRNA ligase, cytoplasmic OS=Mus musculus OX=10090 GN=Dars1 PE=1 SV=2
15430000	18119000	14711000	9818300	11421000	14416000	11001000	1.55007	0.463794	Dars2	sp|Q8BIP0|SYDM_MOUSE Aspartate--tRNA ligase, mitochondrial OS=Mus musculus OX=10090 GN=Dars2 PE=1 SV=1
6590100	7083400	6869900	6047300	9778300	11635000	5416400	0.325135	-0.263366	Daw1	tr|D3Z7A5|D3Z7A5_MOUSE Dynein assembly factor with WDR repeat domains 1 OS=Mus musculus OX=10090 GN=Daw1 PE=4 SV=1
28906000	24074000	23492000	16871000	20448000	24381000	25707000	0.609419	0.22222	Daxx	sp|O35613|DAXX_MOUSE Death domain-associated protein 6 OS=Mus musculus OX=10090 GN=Daxx PE=1 SV=1
193360000	145780000	136660000	236660000	269730000	179140000	191000000	1.04774	-0.466411	Dazap1	sp|Q9JII5|DAZP1_MOUSE DAZ-associated protein 1 OS=Mus musculus OX=10090 GN=Dazap1 PE=1 SV=2
89475000	81288000	85971000	76522000	78008000	79689000	57687000	0.97542	0.229808	Dazl	sp|Q64368|DAZL_MOUSE Deleted in azoospermia-like OS=Mus musculus OX=10090 GN=Dazl PE=1 SV=1
859560000	1289300000	1050300000	804610000	938390000	850830000	783970000	0.984946	0.336647	Dbi	sp|P31786|ACBP_MOUSE Acyl-CoA-binding protein OS=Mus musculus OX=10090 GN=Dbi PE=1 SV=2
14180000	15550000	14596000	14509000	12303000	11074000	15984000	0.425635	0.133709	Dbn1	sp|Q9QXS6|DREB_MOUSE Drebrin OS=Mus musculus OX=10090 GN=Dbn1 PE=1 SV=4
64416000	67288000	80990000	89751000	71509000	79623000	52976000	0.0912509	-0.0513072	Dbnl	sp|Q62418|DBNL_MOUSE Drebrin-like protein OS=Mus musculus OX=10090 GN=Dbnl PE=1 SV=2
13539000	7270000	8289800	11007000	14402000	15106000	10211000	0.642313	-0.386728	Dbr1	sp|Q923B1|DBR1_MOUSE Lariat debranching enzyme OS=Mus musculus OX=10090 GN=Dbr1 PE=1 SV=2
24156000	29453000	29403000	24878000	18578000	20885000	19974000	1.5381	0.392568	Dbt	sp|P53395|ODB2_MOUSE Lipoamide acyltransferase component of branched-chain alpha-keto acid dehydrogenase complex, mitochondrial OS=Mus musculus OX=10090 GN=Dbt PE=1 SV=2
5365500	5680000	6275000	5214900	4744800	6977000	7648800	0.167799	-0.0902896	Dcaf11	sp|Q91VU6|DCA11_MOUSE DDB1- and CUL4-associated factor 11 OS=Mus musculus OX=10090 GN=Dcaf11 PE=1 SV=1
9186100	7053900	12087000	8706800	7613900	5635100	7677400	0.665149	0.350001	Dcaf13	sp|Q6PAC3|DCA13_MOUSE DDB1- and CUL4-associated factor 13 OS=Mus musculus OX=10090 GN=Dcaf13 PE=2 SV=2
6676600	5676000	3500000	4910300	3148100	8284200	8417700	0.206216	-0.228272	Dcaf5	sp|Q80T85|DCAF5_MOUSE DDB1- and CUL4-associated factor 5 OS=Mus musculus OX=10090 GN=Dcaf5 PE=1 SV=2
5430000	174660	4786400	174660	174660	8527800	10699000	0.152748	-0.498715	Dcaf6	sp|Q9DC22|DCAF6_MOUSE DDB1- and CUL4-associated factor 6 OS=Mus musculus OX=10090 GN=Dcaf6 PE=1 SV=1
21337000	18817000	16873000	16791000	24081000	21673000	25690000	0.547855	-0.214668	Dcaf7	sp|P61963|DCAF7_MOUSE DDB1- and CUL4-associated factor 7 OS=Mus musculus OX=10090 GN=Dcaf7 PE=1 SV=1
22734000	15241000	22673000	22743000	30958000	26330000	24548000	0.998122	-0.371024	Dcaf8	sp|Q8N7N5|DCAF8_MOUSE DDB1- and CUL4-associated factor 8 OS=Mus musculus OX=10090 GN=Dcaf8 PE=1 SV=1
51991000	62345000	54161000	64394000	50734000	57734000	48379000	0.0596487	0.0221416	Dcakd	sp|Q8BHC4|DCAKD_MOUSE Dephospho-CoA kinase domain-containing protein OS=Mus musculus OX=10090 GN=Dcakd PE=1 SV=1
198080000	301780000	169560000	156860000	115790000	106440000	123160000	1.37283	0.829543	Dcn	sp|P28654|PGS2_MOUSE Decorin OS=Mus musculus OX=10090 GN=Dcn PE=1 SV=1
22149000	37551000	18555000	28702000	14974000	16823000	15193000	0.519058	0.46308	Dcp1a	sp|Q91YD3|DCP1A_MOUSE mRNA-decapping enzyme 1A OS=Mus musculus OX=10090 GN=Dcp1a PE=1 SV=1
174660	174660	4267500	174660	174660	3622800	3886800	0.0918625	-0.352394	Dcp1b	sp|Q3U564|DCP1B_MOUSE mRNA-decapping enzyme 1B OS=Mus musculus OX=10090 GN=Dcp1b PE=1 SV=1
174660	4929100	174660	3893300	174660	174660	174660	0.143055	0.671985	Dcp2	sp|Q9CYC6|DCP2_MOUSE m7GpppN-mRNA hydrolase OS=Mus musculus OX=10090 GN=Dcp2 PE=1 SV=2
103340000	118020000	130290000	106620000	91751000	97671000	100540000	1.21989	0.241559	Dcps	sp|Q9DAR7|DCPS_MOUSE m7GpppX diphosphatase OS=Mus musculus OX=10090 GN=Dcps PE=1 SV=1
79514000	67735000	70122000	79346000	79485000	89365000	101180000	1.09228	-0.269584	Dctn1	sp|O08788|DCTN1_MOUSE Dynactin subunit 1 OS=Mus musculus OX=10090 GN=Dctn1 PE=1 SV=3
212090000	215230000	212840000	260360000	274000000	197860000	219530000	0.532295	-0.157113	Dctn2	sp|Q99KJ8|DCTN2_MOUSE Dynactin subunit 2 OS=Mus musculus OX=10090 GN=Dctn2 PE=1 SV=3
54526000	41506000	45901000	52148000	53680000	59371000	52573000	0.933429	-0.202571	Dctn3	sp|Q9Z0Y1|DCTN3_MOUSE Dynactin subunit 3 OS=Mus musculus OX=10090 GN=Dctn3 PE=1 SV=2
24494000	18799000	21395000	22945000	35398000	29884000	41036000	1.12992	-0.583702	Dctn4	sp|Q8CBY8|DCTN4_MOUSE Dynactin subunit 4 OS=Mus musculus OX=10090 GN=Dctn4 PE=1 SV=1
6755700	7570800	174660	10479000	7865600	3644000	7710300	0.443301	-0.619204	Dctn5	sp|Q9QZB9|DCTN5_MOUSE Dynactin subunit 5 OS=Mus musculus OX=10090 GN=Dctn5 PE=1 SV=1
35425000	18088000	31679000	36918000	36833000	23822000	38846000	0.413201	-0.264217	Dctn6	sp|Q9WUB4|DCTN6_MOUSE Dynactin subunit 6 OS=Mus musculus OX=10090 GN=Dctn6 PE=1 SV=1
35598000	26764000	38690000	28433000	39287000	25717000	43865000	0.0371514	-0.0272173	Dctpp1	sp|Q9QY93|DCTP1_MOUSE dCTP pyrophosphatase 1 OS=Mus musculus OX=10090 GN=Dctpp1 PE=1 SV=1
26301000	6857500	9533900	11886000	23617000	14340000	16563000	0.152078	-0.222297	Dcun1d1	sp|Q9QZ73|DCNL1_MOUSE DCN1-like protein 1 OS=Mus musculus OX=10090 GN=Dcun1d1 PE=2 SV=1;tr|A0A1Y7VP24|A0A1Y7VP24_MOUSE DCN1-like protein OS=Mus musculus OX=10090 GN=Tes3-ps PE=4 SV=1
3997700	3453300	3184700	174660	174660	3231700	4768400	0.472525	0.764205	Dcun1d3	sp|Q8K0V2|DCNL3_MOUSE DCN1-like protein 3 OS=Mus musculus OX=10090 GN=Dcun1d3 PE=2 SV=1
26574000	14439000	15637000	20001000	21557000	24039000	33953000	0.558207	-0.398308	Dcun1d5	sp|Q9CXV9|DCNL5_MOUSE DCN1-like protein 5 OS=Mus musculus OX=10090 GN=Dcun1d5 PE=1 SV=1
52734000	29985000	60287000	19402000	20210000	45591000	25139000	0.940792	0.789131	Dda1	sp|Q9D9Z5|DDA1_MOUSE DET1- and DDB1-associated protein 1 OS=Mus musculus OX=10090 GN=Dda1 PE=1 SV=1
148640000	176560000	169530000	135940000	149920000	154390000	160380000	0.757616	0.135202	Ddah1	sp|Q9CWS0|DDAH1_MOUSE N(G),N(G)-dimethylarginine dimethylaminohydrolase 1 OS=Mus musculus OX=10090 GN=Ddah1 PE=1 SV=3
88205000	124520000	91321000	78489000	76873000	80108000	97618000	0.770019	0.283424	Ddah2	sp|Q99LD8|DDAH2_MOUSE N(G),N(G)-dimethylarginine dimethylaminohydrolase 2 OS=Mus musculus OX=10090 GN=Ddah2 PE=1 SV=1
118900000	108990000	118490000	115140000	116920000	126650000	124580000	0.572548	-0.065496	Ddb1	sp|Q3U1J4|DDB1_MOUSE DNA damage-binding protein 1 OS=Mus musculus OX=10090 GN=Ddb1 PE=1 SV=2
22695000	22086000	25098000	23511000	20916000	29481000	28840000	0.402887	-0.141142	Ddb2	sp|Q99J79|DDB2_MOUSE DNA damage-binding protein 2 OS=Mus musculus OX=10090 GN=Ddb2 PE=1 SV=1
17921000	11022000	10504000	10969000	19357000	15539000	16359000	0.357184	-0.242518	Ddhd1	sp|Q80YA3|DDHD1_MOUSE Phospholipase DDHD1 OS=Mus musculus OX=10090 GN=Ddhd1 PE=1 SV=1
15888000	18341000	19568000	16559000	14925000	22182000	34295000	0.322454	-0.294301	Ddhd2	sp|Q80Y98|DDHD2_MOUSE Phospholipase DDHD2 OS=Mus musculus OX=10090 GN=Ddhd2 PE=1 SV=3
29999000	27455000	29923000	26421000	28559000	26217000	34912000	0.0131542	0.00488317	Ddi2	sp|A2ADY9|DDI2_MOUSE Protein DDI1 homolog 2 OS=Mus musculus OX=10090 GN=Ddi2 PE=1 SV=1
411970000	379730000	416610000	415510000	495110000	496090000	463190000	1.34295	-0.214933	Ddost	sp|O54734|OST48_MOUSE Dolichyl-diphosphooligosaccharide--protein glycosyltransferase 48 kDa subunit OS=Mus musculus OX=10090 GN=Ddost PE=1 SV=2
26043000	25337000	24663000	19342000	27854000	23801000	60100000	0.276781	-0.37071	Ddrgk1	sp|Q80WW9|DDRGK_MOUSE DDRGK domain-containing protein 1 OS=Mus musculus OX=10090 GN=Ddrgk1 PE=1 SV=2
416090000	203240000	326860000	373610000	503810000	550220000	453270000	1.13814	-0.576192	Ddt	sp|O35215|DOPD_MOUSE D-dopachrome decarboxylase OS=Mus musculus OX=10090 GN=Ddt PE=1 SV=3
360000000	301030000	296280000	284310000	292360000	291850000	291630000	0.813354	0.137784	Ddx1	sp|Q91VR5|DDX1_MOUSE ATP-dependent RNA helicase DDX1 OS=Mus musculus OX=10090 GN=Ddx1 PE=1 SV=1
8963000	10313000	18264000	11650000	12015000	10868000	7344200	0.310842	0.257301	Ddx10	sp|Q80Y44|DDX10_MOUSE Probable ATP-dependent RNA helicase DDX10 OS=Mus musculus OX=10090 GN=Ddx10 PE=1 SV=2
218040000	173010000	204970000	189920000	190600000	182950000	171400000	0.551791	0.112909	Ddx17	sp|Q501J6|DDX17_MOUSE Probable ATP-dependent RNA helicase DDX17 OS=Mus musculus OX=10090 GN=Ddx17 PE=1 SV=1
16858000	21107000	15638000	14494000	20448000	14387000	18039000	0.177655	0.0852878	Ddx18	sp|Q8K363|DDX18_MOUSE ATP-dependent RNA helicase DDX18 OS=Mus musculus OX=10090 GN=Ddx18 PE=1 SV=1
56674000	66724000	65810000	55820000	51455000	60357000	72226000	0.205382	0.07283	Ddx19a	sp|Q61655|DD19A_MOUSE ATP-dependent RNA helicase DDX19A OS=Mus musculus OX=10090 GN=Ddx19a PE=1 SV=2
23961000	18441000	32817000	40610000	36061000	22173000	24505000	0.393547	-0.298539	Ddx19b	tr|Q8BZY3|Q8BZY3_MOUSE RNA helicase OS=Mus musculus OX=10090 GN=Ddx19b PE=1 SV=1
24271000	21495000	24709000	25153000	24709000	29381000	31508000	0.97574	-0.237099	Ddx20	sp|Q9JJY4|DDX20_MOUSE Probable ATP-dependent RNA helicase DDX20 OS=Mus musculus OX=10090 GN=Ddx20 PE=1 SV=2
70260000	82873000	71953000	57089000	58389000	58617000	48417000	2.16553	0.431631	Ddx21	sp|Q9JIK5|DDX21_MOUSE Nucleolar RNA helicase 2 OS=Mus musculus OX=10090 GN=Ddx21 PE=1 SV=3
59420000	60048000	61899000	59606000	56909000	65504000	68040000	0.270301	-0.0483191	Ddx23	tr|D3Z0M9|D3Z0M9_MOUSE RNA helicase OS=Mus musculus OX=10090 GN=Ddx23 PE=1 SV=1
12029000	13301000	12724000	11510000	11653000	10315000	13770000	0.421769	0.102832	Ddx24	sp|Q9ESV0|DDX24_MOUSE ATP-dependent RNA helicase DDX24 OS=Mus musculus OX=10090 GN=Ddx24 PE=1 SV=2
32368000	18469000	34285000	55711000	67980000	67784000	80033000	2.56056	-1.25835	Ddx25	sp|Q9QY15|DDX25_MOUSE ATP-dependent RNA helicase DDX25 OS=Mus musculus OX=10090 GN=Ddx25 PE=1 SV=2
15088000	20874000	17215000	13262000	12747000	12407000	10162000	1.728	0.545537	Ddx27	sp|Q921N6|DDX27_MOUSE Probable ATP-dependent RNA helicase DDX27 OS=Mus musculus OX=10090 GN=Ddx27 PE=1 SV=3
7707700	4597300	7078100	4570000	4506100	7709100	6435900	0.212945	0.154401	Ddx31	sp|Q6NZQ2|DDX31_MOUSE Probable ATP-dependent RNA helicase DDX31 OS=Mus musculus OX=10090 GN=Ddx31 PE=2 SV=2
199650000	170720000	154730000	162570000	247200000	236920000	287340000	0.87359	-0.415839	Ddx39a	sp|Q8VDW0|DX39A_MOUSE ATP-dependent RNA helicase DDX39A OS=Mus musculus OX=10090 GN=Ddx39a PE=1 SV=1
424800000	366340000	386370000	320770000	343600000	343480000	357290000	1.53539	0.201728	Ddx39b	sp|Q9Z1N5|DX39B_MOUSE Spliceosome RNA helicase Ddx39b OS=Mus musculus OX=10090 GN=Ddx39b PE=1 SV=1
40559000	50776000	53880000	35924000	53889000	39532000	38893000	0.486873	0.202724	Ddx3x	sp|Q62167|DDX3X_MOUSE ATP-dependent RNA helicase DDX3X OS=Mus musculus OX=10090 GN=Ddx3x PE=1 SV=3
26715000	23279000	15284000	24204000	16257000	25549000	14230000	0.146244	0.117313	Ddx3y	sp|Q62095|DDX3Y_MOUSE ATP-dependent RNA helicase DDX3Y OS=Mus musculus OX=10090 GN=Ddx3y PE=1 SV=2
781510000	393530000	517780000	688290000	805410000	808940000	1034100000	1.04848	-0.563973	Ddx4	sp|Q61496|DDX4_MOUSE ATP-dependent RNA helicase DDX4 OS=Mus musculus OX=10090 GN=Ddx4 PE=1 SV=2
26766000	18626000	24035000	20635000	19923000	27868000	26185000	0.0579768	-0.0314736	Ddx41	sp|Q91VN6|DDX41_MOUSE Probable ATP-dependent RNA helicase DDX41 OS=Mus musculus OX=10090 GN=Ddx41 PE=1 SV=2
117460000	125820000	114320000	118550000	130560000	115010000	126840000	0.283	-0.0422213	Ddx42	sp|Q810A7|DDX42_MOUSE ATP-dependent RNA helicase DDX42 OS=Mus musculus OX=10090 GN=Ddx42 PE=1 SV=3
58648000	36705000	42997000	66186000	65218000	69898000	66897000	1.8748	-0.539944	Ddx43	tr|D3Z6P9|D3Z6P9_MOUSE RNA helicase OS=Mus musculus OX=10090 GN=Ddx43 PE=1 SV=1
71712000	52194000	58265000	61316000	65206000	67273000	79766000	0.512223	-0.171532	Ddx46	sp|Q569Z5|DDX46_MOUSE Probable ATP-dependent RNA helicase DDX46 OS=Mus musculus OX=10090 GN=Ddx46 PE=1 SV=2
8457600	11469000	11896000	7273300	6079000	6905500	8335900	1.64867	0.569392	Ddx47	sp|Q9CWX9|DDX47_MOUSE Probable ATP-dependent RNA helicase DDX47 OS=Mus musculus OX=10090 GN=Ddx47 PE=2 SV=2
465930000	387270000	384820000	453630000	467980000	409250000	367090000	0.125114	-0.0407219	Ddx5	sp|Q61656|DDX5_MOUSE Probable ATP-dependent RNA helicase DDX5 OS=Mus musculus OX=10090 GN=Ddx5 PE=1 SV=2
16043000	11935000	13134000	11581000	10389000	12589000	12193000	0.83894	0.229569	Ddx50	sp|Q99MJ9|DDX50_MOUSE ATP-dependent RNA helicase DDX50 OS=Mus musculus OX=10090 GN=Ddx50 PE=2 SV=1
19733000	30005000	24345000	19178000	10399000	11533000	17493000	1.42665	0.753206	Ddx51	sp|Q6P9R1|DDX51_MOUSE ATP-dependent RNA helicase DDX51 OS=Mus musculus OX=10090 GN=Ddx51 PE=1 SV=1
7158200	8784000	6481400	8896800	8193200	174660	4742000	0.343522	0.442115	Ddx52	sp|Q8K301|DDX52_MOUSE Probable ATP-dependent RNA helicase DDX52 OS=Mus musculus OX=10090 GN=Ddx52 PE=2 SV=2
18367000	14896000	23225000	16021000	14164000	16251000	20066000	0.379112	0.179584	Ddx54	sp|Q8K4L0|DDX54_MOUSE ATP-dependent RNA helicase DDX54 OS=Mus musculus OX=10090 GN=Ddx54 PE=1 SV=1
13236000	4532600	6356200	5648300	5775900	174660	12977000	0.193744	0.388313	Ddx55	sp|Q6ZPL9|DDX55_MOUSE ATP-dependent RNA helicase DDX55 OS=Mus musculus OX=10090 GN=Ddx55 PE=1 SV=2
15926000	14019000	10959000	7135900	7420500	11473000	10787000	1.24557	0.566931	Ddx56	sp|Q9D0R4|DDX56_MOUSE Probable ATP-dependent RNA helicase DDX56 OS=Mus musculus OX=10090 GN=Ddx56 PE=2 SV=1
174660	174660	174660	2015400	174660	3959800	3294300	1.11184	-3.7568	Ddx59	sp|Q9DBN9|DDX59_MOUSE Probable ATP-dependent RNA helicase DDX59 OS=Mus musculus OX=10090 GN=Ddx59 PE=1 SV=1
147380000	165960000	130620000	133070000	144000000	158120000	180050000	0.149474	-0.0556821	Ddx6	sp|P54823|DDX6_MOUSE Probable ATP-dependent RNA helicase DDX6 OS=Mus musculus OX=10090 GN=Ddx6 PE=1 SV=1
164470000	144720000	145130000	151750000	168880000	154000000	158000000	0.413983	-0.0626157	Decr1	sp|Q9CQ62|DECR_MOUSE 2,4-dienoyl-CoA reductase [(3E)-enoyl-CoA-producing], mitochondrial OS=Mus musculus OX=10090 GN=Decr1 PE=1 SV=1
7792800	15062000	11892000	14970000	11108000	13246000	12471000	0.279657	-0.160895	Decr2	sp|Q9WV68|DECR2_MOUSE Peroxisomal 2,4-dienoyl-CoA reductase [(3E)-enoyl-CoA-producing] OS=Mus musculus OX=10090 GN=Decr2 PE=1 SV=1
174660	2424000	2180500	7197400	174660	6148100	7513700	0.840407	-1.72285	Defb19	sp|Q8K3I8|DFB19_MOUSE Beta-defensin 19 OS=Mus musculus OX=10090 GN=Defb19 PE=1 SV=1
174660	10970000	9321900	174660	13528000	6846200	3338300	0.0683407	0.192071	Degs1	sp|O09005|DEGS1_MOUSE Sphingolipid delta(4)-desaturase DES1 OS=Mus musculus OX=10090 GN=Degs1 PE=1 SV=1
69545000	60038000	68646000	44334000	46616000	48439000	29724000	2.07589	0.644218	Dek	sp|Q7TNV0|DEK_MOUSE Protein DEK OS=Mus musculus OX=10090 GN=Dek PE=1 SV=1
9822300	12447000	10235000	17717000	174660	174660	174660	0.546235	1.24848	Dennd1a	sp|Q8K382|DEN1A_MOUSE DENN domain-containing protein 1A OS=Mus musculus OX=10090 GN=Dennd1a PE=1 SV=2
24248000	23616000	22344000	17736000	16790000	18388000	19267000	3.00999	0.375054	Dennd4c	sp|A6H8H2|DEN4C_MOUSE DENN domain-containing protein 4C OS=Mus musculus OX=10090 GN=Dennd4c PE=1 SV=1
13842000	6501200	5639100	14096000	17652000	12612000	12891000	1.09997	-0.724734	Dennd5b	sp|A2RSQ0|DEN5B_MOUSE DENN domain-containing protein 5B OS=Mus musculus OX=10090 GN=Dennd5b PE=1 SV=2
33042000	40327000	29712000	29780000	40443000	32763000	34937000	0.0107522	-0.00504712	Denr	sp|Q9CQJ6|DENR_MOUSE Density-regulated protein OS=Mus musculus OX=10090 GN=Denr PE=1 SV=1
174660	174660	4151100	174660	8840700	8946700	3301600	0.639336	-1.82522	Depdc5	sp|P61460|DEPD5_MOUSE GATOR complex protein DEPDC5 OS=Mus musculus OX=10090 GN=Depdc5 PE=1 SV=2
9669000	6358100	6873300	3614600	5952400	7971500	8343400	0.313141	0.238467	Dera	sp|Q91YP3|DEOC_MOUSE Deoxyribose-phosphate aldolase OS=Mus musculus OX=10090 GN=Dera PE=1 SV=1
24008000	16361000	16320000	16717000	19232000	17593000	15729000	0.279757	0.125855	Derl1	sp|Q99J56|DERL1_MOUSE Derlin-1 OS=Mus musculus OX=10090 GN=Derl1 PE=1 SV=1
174660	14260000	11725000	174660	174660	22884000	16358000	0.0531331	-0.182803	Derl2	sp|Q8BNI4|DERL2_MOUSE Derlin-2 OS=Mus musculus OX=10090 GN=Derl2 PE=1 SV=2
2556100	4973000	3219400	5951600	7551700	3252000	2761200	0.3783	-0.445522	Derl3	sp|Q9D8K3|DERL3_MOUSE Derlin-3 OS=Mus musculus OX=10090 GN=Derl3 PE=1 SV=1
108630000	173040000	101580000	142440000	106500000	109010000	200490000	0.138376	-0.128079	Des	sp|P31001|DESM_MOUSE Desmin OS=Mus musculus OX=10090 GN=Des PE=1 SV=3
13458000	16478000	14079000	13617000	12896000	174660	17873000	0.322759	0.397262	Dffa	sp|O54786|DFFA_MOUSE DNA fragmentation factor subunit alpha OS=Mus musculus OX=10090 GN=Dffa PE=1 SV=2
9924100	8745800	8826600	12706000	174660	7498400	11095000	0.147845	0.220122	Dgat1	sp|Q9Z2A7|DGAT1_MOUSE Diacylglycerol O-acyltransferase 1 OS=Mus musculus OX=10090 GN=Dgat1 PE=1 SV=1
10052000	11943000	13575000	7153600	10363000	6426900	7099900	1.54067	0.611412	Dgcr14	sp|O70279|ESS2_MOUSE Splicing factor ESS-2 homolog OS=Mus musculus OX=10090 GN=Ess2 PE=1 SV=2
2098200	1790100	174660	174660	174660	1726700	174660	0.529183	1.26721	Dgcr6	sp|O35347|DGCR6_MOUSE Protein DGCR6 OS=Mus musculus OX=10090 GN=Dgcr6 PE=2 SV=2
5043000	4675400	2946000	6168200	174660	174660	5947500	0.208869	0.437931	Dgcr8	sp|Q9EQM6|DGCR8_MOUSE Microprocessor complex subunit DGCR8 OS=Mus musculus OX=10090 GN=Dgcr8 PE=1 SV=2
18714000	7133800	11078000	11889000	13339000	11700000	14528000	0.066465	-0.0636726	Dgke	sp|Q9R1C6|DGKE_MOUSE Diacylglycerol kinase epsilon OS=Mus musculus OX=10090 GN=Dgke PE=1 SV=1
41676000	21866000	18925000	28101000	47099000	24298000	11280000	0.00643653	-0.0107451	Dguok	sp|Q9QX60|DGUOK_MOUSE Deoxyguanosine kinase, mitochondrial OS=Mus musculus OX=10090 GN=Dguok PE=1 SV=3
31574000	24914000	174660	27340000	42241000	37618000	174660	0.231368	-0.507132	Dhcr7	sp|O88455|DHCR7_MOUSE 7-dehydrocholesterol reductase OS=Mus musculus OX=10090 GN=Dhcr7 PE=1 SV=1
6391100	7594200	10828000	14039000	8611700	8240400	7480300	0.255337	-0.21388	Dhdh	sp|Q9DBB8|DHDH_MOUSE Trans-1,2-dihydrobenzene-1,2-diol dehydrogenase OS=Mus musculus OX=10090 GN=Dhdh PE=1 SV=1
43583000	48610000	44721000	36928000	47301000	41418000	40022000	0.695974	0.140004	Dhfr	sp|P00375|DYR_MOUSE Dihydrofolate reductase OS=Mus musculus OX=10090 GN=Dhfr PE=1 SV=3
19551000	19033000	16782000	18839000	16393000	14898000	17619000	0.56803	0.123838	Dhodh	sp|O35435|PYRD_MOUSE Dihydroorotate dehydrogenase (quinone), mitochondrial OS=Mus musculus OX=10090 GN=Dhodh PE=1 SV=2
8988800	7989000	10964000	8380900	7136200	8410000	11479000	0.130977	0.0734645	Dhps	sp|Q3TXU5|DHYS_MOUSE Deoxyhypusine synthase OS=Mus musculus OX=10090 GN=Dhps PE=1 SV=2
27826000	30172000	26366000	35426000	46018000	42499000	53175000	1.81611	-0.654974	Dhrs1	sp|Q99L04|DHRS1_MOUSE Dehydrogenase/reductase SDR family member 1 OS=Mus musculus OX=10090 GN=Dhrs1 PE=1 SV=1
4867100	7295000	11645000	9195300	10149000	11114000	8874300	0.480086	-0.309296	Dhrs13	sp|Q5SS80|DHR13_MOUSE Dehydrogenase/reductase SDR family member 13 OS=Mus musculus OX=10090 GN=Dhrs13 PE=1 SV=1
12987000	17459000	11216000	14046000	17347000	13976000	20366000	0.475714	-0.242892	Dhrs4	sp|Q99LB2|DHRS4_MOUSE Dehydrogenase/reductase SDR family member 4 OS=Mus musculus OX=10090 GN=Dhrs4 PE=1 SV=3
75527000	88434000	73303000	67603000	70502000	61371000	82725000	0.596789	0.164808	Dhrs7	sp|Q9CXR1|DHRS7_MOUSE Dehydrogenase/reductase SDR family member 7 OS=Mus musculus OX=10090 GN=Dhrs7 PE=1 SV=2
25737000	25545000	24292000	39172000	32708000	33288000	44161000	1.88441	-0.567495	Dhrs7b	sp|Q99J47|DRS7B_MOUSE Dehydrogenase/reductase SDR family member 7B OS=Mus musculus OX=10090 GN=Dhrs7b PE=1 SV=1
4148700	4892600	7373200	174660	5837400	7779700	11448000	0.105598	-0.20569	Dhrsx	sp|Q8VBZ0|DHRSX_MOUSE Dehydrogenase/reductase SDR family member on chromosome X homolog OS=Mus musculus OX=10090 GN=Dhrsx PE=1 SV=2
6142200	7328500	174660	12530000	10138000	174660	6472800	0.314892	-0.688214	Dhtkd1	sp|A2ATU0|DHTK1_MOUSE Probable 2-oxoglutarate dehydrogenase E1 component DHKTD1, mitochondrial OS=Mus musculus OX=10090 GN=Dhtkd1 PE=1 SV=1
104560000	94822000	106630000	109040000	113830000	132160000	135540000	1.24695	-0.265833	Dhx15	sp|O35286|DHX15_MOUSE Pre-mRNA-splicing factor ATP-dependent RNA helicase DHX15 OS=Mus musculus OX=10090 GN=Dhx15 PE=1 SV=2
14189000	12303000	12676000	8388600	11225000	14505000	9904800	0.584865	0.246442	Dhx16	tr|G3X8X0|G3X8X0_MOUSE RNA helicase OS=Mus musculus OX=10090 GN=Dhx16 PE=1 SV=1
18995000	24865000	21505000	19016000	16751000	19146000	19834000	0.938599	0.22154	Dhx29	sp|Q6PGC1|DHX29_MOUSE ATP-dependent RNA helicase DHX29 OS=Mus musculus OX=10090 GN=Dhx29 PE=1 SV=1
74899000	62069000	69449000	78702000	92879000	87154000	84084000	1.81158	-0.316848	Dhx30	sp|Q99PU8|DHX30_MOUSE ATP-dependent RNA helicase DHX30 OS=Mus musculus OX=10090 GN=Dhx30 PE=1 SV=1
13988000	8359000	9564700	9025600	10971000	13009000	13269000	0.196438	-0.121098	Dhx32	sp|Q8BZS9|DHX32_MOUSE Putative pre-mRNA-splicing factor ATP-dependent RNA helicase DHX32 OS=Mus musculus OX=10090 GN=Dhx32 PE=1 SV=2
4483200	174660	174660	174660	174660	174660	11420000	0.146655	-0.890399	Dhx34	sp|Q9DBV3|DHX34_MOUSE Probable ATP-dependent RNA helicase DHX34 OS=Mus musculus OX=10090 GN=Dhx34 PE=1 SV=2
6322500	5056700	5939300	5642000	4520500	5407500	6027800	0.317367	0.0964671	Dhx35	tr|A2ACQ1|A2ACQ1_MOUSE RNA helicase OS=Mus musculus OX=10090 GN=Dhx35 PE=1 SV=1
28865000	21223000	32340000	30636000	28445000	37605000	27614000	0.407038	-0.177582	Dhx36	sp|Q8VHK9|DHX36_MOUSE ATP-dependent DNA/RNA helicase DHX36 OS=Mus musculus OX=10090 GN=Dhx36 PE=1 SV=2
23530000	14548000	28915000	10026000	20944000	28130000	19744000	0.179691	0.180047	Dhx37	tr|Q6NZL1|Q6NZL1_MOUSE DEAH (Asp-Glu-Ala-His) box polypeptide 37 OS=Mus musculus OX=10090 GN=Dhx37 PE=1 SV=1
17309000	19562000	19099000	20532000	19325000	17827000	24650000	0.469269	-0.141797	Dhx38	tr|Q80X98|Q80X98_MOUSE RNA helicase OS=Mus musculus OX=10090 GN=Dhx38 PE=1 SV=1
10781000	7937700	8670700	8595800	8688900	8101600	8031800	0.464834	0.128025	Dhx40	sp|Q6PE54|DHX40_MOUSE Probable ATP-dependent RNA helicase DHX40 OS=Mus musculus OX=10090 GN=Dhx40 PE=1 SV=1
174660	174660	174660	174660	3748700	174660	7206900	0.617693	-4.01626	Dhx58	sp|Q99J87|DHX58_MOUSE Probable ATP-dependent RNA helicase DHX58 OS=Mus musculus OX=10090 GN=Dhx58 PE=1 SV=2
10021000	7160800	9393100	10001000	12704000	12344000	18024000	1.02921	-0.582876	Dhx8	sp|A2A4P0|DHX8_MOUSE ATP-dependent RNA helicase DHX8 OS=Mus musculus OX=10090 GN=Dhx8 PE=2 SV=1
270520000	220910000	239260000	273760000	300020000	301390000	320250000	1.68556	-0.295149	Dhx9	sp|O70133|DHX9_MOUSE ATP-dependent RNA helicase A OS=Mus musculus OX=10090 GN=Dhx9 PE=1 SV=2
345690000	177950000	245030000	385360000	425110000	380430000	411850000	1.70792	-0.645076	Diablo	sp|Q9JIQ3|DBLOH_MOUSE Diablo homolog, mitochondrial OS=Mus musculus OX=10090 GN=Diablo PE=1 SV=2
13531000	11314000	12956000	10711000	11857000	17679000	11648000	0.0673431	-0.0421336	Diaph1	sp|O08808|DIAP1_MOUSE Protein diaphanous homolog 1 OS=Mus musculus OX=10090 GN=Diaph1 PE=1 SV=1
32056000	27641000	34984000	23877000	30911000	30451000	51354000	0.132895	-0.113699	Diaph2	sp|O70566|DIAP2_MOUSE Protein diaphanous homolog 2 OS=Mus musculus OX=10090 GN=Diaph2 PE=1 SV=2
2852600	5369500	2417400	1266500	3435100	4069000	3311100	0.194704	0.231644	Diaph3	sp|Q9Z207|DIAP3_MOUSE Protein diaphanous homolog 3 OS=Mus musculus OX=10090 GN=Diaph3 PE=1 SV=1
9911200	10774000	12185000	9556600	5593200	10031000	7931400	1.01794	0.404455	Dicer1	sp|Q8R418|DICER_MOUSE Endoribonuclease Dicer OS=Mus musculus OX=10090 GN=Dicer1 PE=1 SV=3
19675000	19858000	20781000	21815000	17891000	22787000	29102000	0.445701	-0.187738	Dido1	sp|Q8C9B9|DIDO1_MOUSE Death-inducer obliterator 1 OS=Mus musculus OX=10090 GN=Dido1 PE=1 SV=4
13411000	7538600	10064000	15772000	10001000	10302000	8866800	0.146186	-0.120119	Dimt1	sp|Q9D0D4|DIM1_MOUSE Probable dimethyladenosine transferase OS=Mus musculus OX=10090 GN=Dimt1 PE=2 SV=1
7942400	6865400	7384800	7273000	5435300	9094600	4309000	0.280498	0.180409	Dip2b	sp|Q3UH60|DIP2B_MOUSE Disco-interacting protein 2 homolog B OS=Mus musculus OX=10090 GN=Dip2b PE=1 SV=1
39401000	42828000	43973000	33606000	33229000	28090000	30250000	2.59943	0.426826	Dis3	sp|Q9CSH3|RRP44_MOUSE Exosome complex exonuclease RRP44 OS=Mus musculus OX=10090 GN=Dis3 PE=1 SV=4
65173000	68302000	70452000	44480000	42624000	48970000	43957000	3.98081	0.594845	Dkc1	sp|Q9ESX5|DKC1_MOUSE H/ACA ribonucleoprotein complex subunit DKC1 OS=Mus musculus OX=10090 GN=Dkc1 PE=1 SV=4
13816000	1936300	11521000	21970000	27718000	34694000	52693000	1.50979	-1.91437	Dkkl1	sp|Q9QZL9|DKKL1_MOUSE Dickkopf-like protein 1 OS=Mus musculus OX=10090 GN=Dkkl1 PE=1 SV=2
341990000	213140000	247150000	356350000	343810000	333600000	411440000	1.23987	-0.434054	Dlat	sp|Q8BMF4|ODP2_MOUSE Dihydrolipoyllysine-residue acetyltransferase component of pyruvate dehydrogenase complex, mitochondrial OS=Mus musculus OX=10090 GN=Dlat PE=1 SV=2
309550000	319210000	316840000	368420000	350630000	306730000	277320000	0.164006	-0.0476084	Dld	sp|O08749|DLDH_MOUSE Dihydrolipoyl dehydrogenase, mitochondrial OS=Mus musculus OX=10090 GN=Dld PE=1 SV=2
28106000	29359000	23756000	23956000	22212000	24041000	22637000	1.28322	0.222051	Dlg1	sp|Q811D0|DLG1_MOUSE Disks large homolog 1 OS=Mus musculus OX=10090 GN=Dlg1 PE=1 SV=1
148660000	68158000	54574000	117090000	83088000	69085000	56377000	0.114771	0.152138	Dlgap1	sp|Q9D415|DLGP1_MOUSE Disks large-associated protein 1 OS=Mus musculus OX=10090 GN=Dlgap1 PE=1 SV=3
20378000	29512000	14429000	21065000	18815000	21616000	14748000	0.230867	0.169659	Dlgap4	sp|B1AZP2|DLGP4_MOUSE Disks large-associated protein 4 OS=Mus musculus OX=10090 GN=Dlgap4 PE=1 SV=1
42958000	31923000	29924000	43135000	39081000	16174000	24617000	0.200501	0.184005	Dlgap5	sp|Q8K4R9|DLGP5_MOUSE Disks large-associated protein 5 OS=Mus musculus OX=10090 GN=Dlgap5 PE=1 SV=2
128820000	149980000	110680000	123530000	125020000	119380000	122440000	0.313981	0.082716	Dlst	sp|Q9D2G2|ODO2_MOUSE Dihydrolipoyllysine-residue succinyltransferase component of 2-oxoglutarate dehydrogenase complex, mitochondrial OS=Mus musculus OX=10090 GN=Dlst PE=1 SV=1
19614000	8673300	15757000	14473000	13695000	16671000	24252000	0.269863	-0.234505	Dmap1	sp|Q9JI44|DMAP1_MOUSE DNA methyltransferase 1-associated protein 1 OS=Mus musculus OX=10090 GN=Dmap1 PE=1 SV=1
5713800	10224000	4885400	8334000	7465800	4513900	4268800	0.164581	0.175598	Dmc1	sp|Q61880|DMC1_MOUSE Meiotic recombination protein DMC1/LIM15 homolog OS=Mus musculus OX=10090 GN=Dmc1 PE=1 SV=1
47267000	51064000	41355000	74903000	22030000	26087000	32248000	0.208017	0.262464	Dmd	sp|P11531|DMD_MOUSE Dystrophin OS=Mus musculus OX=10090 GN=Dmd PE=1 SV=3
28552000	33620000	42361000	25919000	23433000	23701000	20675000	1.6028	0.572444	Dmrt1	sp|Q9QZ59|DMRT1_MOUSE Doublesex- and mab-3-related transcription factor 1 OS=Mus musculus OX=10090 GN=Dmrt1 PE=1 SV=2
26944000	9616000	24618000	49069000	24713000	61932000	53268000	1.29773	-1.21213	Dmrtb1	sp|A2A9I7|DMRTB_MOUSE Doublesex- and mab-3-related transcription factor B1 OS=Mus musculus OX=10090 GN=Dmrtb1 PE=1 SV=1
3101900	5997300	3431300	7744300	4188700	7541500	174660	0.121624	-0.233986	Dmrtc1b	tr|Q2PMX6|Q2PMX6_MOUSE DMRT-like family C1b OS=Mus musculus OX=10090 GN=Dmrtc1b PE=1 SV=1
7723300	4943100	4615700	4333500	5869300	4955100	4343800	0.415091	0.240716	Dmrtc1c1	tr|Q9D410|Q9D410_MOUSE DMRT-like family C1c1 OS=Mus musculus OX=10090 GN=Dmrtc1c1 PE=1 SV=1
7810300	174660	3927000	5080100	12435000	4411300	10784000	0.654512	-1.0423	Dmrtc2	sp|Q8CGW9|DMRTD_MOUSE Doublesex- and mab-3-related transcription factor C2 OS=Mus musculus OX=10090 GN=Dmrtc2 PE=2 SV=1
6163200	9219400	6207100	1841300	7868900	7537400	13876000	0.0682308	-0.112628	Dmwd	sp|Q08274|DMWD_MOUSE Dystrophia myotonica WD repeat-containing protein OS=Mus musculus OX=10090 GN=Dmwd PE=1 SV=3
18443000	18826000	17070000	15528000	15995000	23914000	27689000	0.310375	-0.198274	Dmxl1	sp|Q6PNC0|DMXL1_MOUSE DmX-like protein 1 OS=Mus musculus OX=10090 GN=Dmxl1 PE=1 SV=1
14635000	7708400	12242000	12444000	12351000	12694000	18773000	0.443723	-0.28696	Dmxl2	sp|Q8BPN8|DMXL2_MOUSE DmX-like protein 2 OS=Mus musculus OX=10090 GN=Dmxl2 PE=1 SV=3
33029000	14584000	29666000	48897000	63920000	70400000	100780000	1.66415	-1.46269	Dnaaf1	sp|Q9D2H9|DAAF1_MOUSE Dynein assembly factor 1, axonemal OS=Mus musculus OX=10090 GN=Dnaaf1 PE=1 SV=1
46885000	31342000	41652000	56139000	64303000	58330000	80560000	1.66221	-0.698184	Dnaaf2	sp|Q8BPI1|KTU_MOUSE Protein kintoun OS=Mus musculus OX=10090 GN=Dnaaf2 PE=1 SV=2
2841700	174660	1801500	12744000	10540000	26353000	26491000	1.7179	-3.56693	Dnaaf3	sp|Q3UYV8|DAAF3_MOUSE Dynein assembly factor 3, axonemal OS=Mus musculus OX=10090 GN=Dnaaf3 PE=1 SV=1
43948000	28180000	30039000	36895000	47108000	47961000	56552000	1.02899	-0.46872	Dnaaf5	sp|B9EJR8|DAAF5_MOUSE Dynein assembly factor 5, axonemal OS=Mus musculus OX=10090 GN=Dnaaf5 PE=1 SV=1
5910700	8802900	174660	13522000	9468400	17656000	17901000	1.54575	-1.56039	Dnaaf9	sp|Q7TT23|CT194_MOUSE Uncharacterized protein C20orf194 homolog OS=Mus musculus OX=10090 PE=1 SV=2
68005000	69781000	42537000	46198000	68231000	32414000	27958000	0.58091	0.459907	Dnah1	sp|E9Q8T7|DYH1_MOUSE Dynein heavy chain 1, axonemal OS=Mus musculus OX=10090 GN=Dnah1 PE=1 SV=1
174660	5064800	6168800	3538200	1703400	4086500	5961700	0.00351056	-0.00745327	Dnah10	tr|D3YYQ8|D3YYQ8_MOUSE Dynein, axonemal, heavy chain 10 OS=Mus musculus OX=10090 GN=Dnah10 PE=1 SV=2
4246900	7949900	2604600	11801000	21959000	19699000	31942000	1.63423	-2.11348	Dnah12	sp|Q3V0Q1|DYH12_MOUSE Dynein heavy chain 12, axonemal OS=Mus musculus OX=10090 GN=Dnah12 PE=1 SV=2
7500600	4118100	4072900	10547000	20502000	22859000	29071000	1.68437	-1.98772	Dnah17	sp|Q69Z23|DYH17_MOUSE Dynein heavy chain 17, axonemal OS=Mus musculus OX=10090 GN=Dnah17 PE=1 SV=2
4226500	174660	174660	5759400	8162400	10437000	21317000	1.1809	-2.90429	Dnah2	sp|P0C6F1|DYH2_MOUSE Dynein heavy chain 2, axonemal OS=Mus musculus OX=10090 GN=Dnah2 PE=1 SV=1
93529000	94999000	76521000	111720000	62050000	72342000	43146000	0.387968	0.28894	Dnah3	sp|Q8BW94|DYH3_MOUSE Dynein heavy chain 3, axonemal OS=Mus musculus OX=10090 GN=Dnah3 PE=1 SV=2
7986700	12058000	13107000	17834000	14873000	30783000	39565000	1.05947	-1.22122	Dnah6	tr|E9Q0B6|E9Q0B6_MOUSE Dynein, axonemal, heavy chain 6 OS=Mus musculus OX=10090 GN=Dnah6 PE=1 SV=1
17412000	15235000	21913000	18215000	15575000	23256000	12476000	0.0920805	0.0654116	Dnah7a	tr|E9Q0T8|E9Q0T8_MOUSE Dynein, axonemal, heavy chain 7A OS=Mus musculus OX=10090 GN=Dnah7a PE=1 SV=2
11648000	6780200	4290500	19216000	20356000	23927000	29633000	2.29114	-1.62036	Dnah7c	tr|A0A087WR13|A0A087WR13_MOUSE Dynein, axonemal, heavy chain 7C OS=Mus musculus OX=10090 GN=Dnah7c PE=1 SV=1
35160000	8051200	23460000	41382000	47522000	42250000	65950000	1.45507	-1.14878	Dnah8	sp|Q91XQ0|DYH8_MOUSE Dynein heavy chain 8, axonemal OS=Mus musculus OX=10090 GN=Dnah8 PE=1 SV=2
4603100	174660	174660	11629000	8306500	8626300	32390000	0.969257	-3.20643	Dnai1	sp|Q8C0M8|DNAI1_MOUSE Dynein intermediate chain 1, axonemal OS=Mus musculus OX=10090 GN=Dnai1 PE=1 SV=1
10264000	174660	9772300	9397900	2653100	9003900	4817100	0.0271613	0.0587838	Dnai2	sp|A2AC93|DNAI2_MOUSE Dynein intermediate chain 2, axonemal OS=Mus musculus OX=10090 GN=Dnai2 PE=1 SV=2
137510000	95071000	111040000	96705000	145380000	187220000	197400000	0.684761	-0.451931	Dnaja1	sp|P63037|DNJA1_MOUSE DnaJ homolog subfamily A member 1 OS=Mus musculus OX=10090 GN=Dnaja1 PE=1 SV=1
111140000	86505000	86731000	107670000	99449000	135810000	197300000	0.704583	-0.510734	Dnaja2	sp|Q9QYJ0|DNJA2_MOUSE DnaJ homolog subfamily A member 2 OS=Mus musculus OX=10090 GN=Dnaja2 PE=1 SV=1
24399000	22282000	25757000	19667000	22022000	25419000	21006000	0.578967	0.132413	Dnaja3	sp|Q99M87|DNJA3_MOUSE DnaJ homolog subfamily A member 3, mitochondrial OS=Mus musculus OX=10090 GN=Dnaja3 PE=1 SV=1
39275000	29813000	37903000	39383000	48959000	59242000	54623000	1.33985	-0.503306	Dnaja4	sp|Q9JMC3|DNJA4_MOUSE DnaJ homolog subfamily A member 4 OS=Mus musculus OX=10090 GN=Dnaja4 PE=1 SV=1
50807000	42560000	55266000	50810000	65625000	67230000	92033000	0.898221	-0.476297	Dnajb1	sp|Q9QYJ3|DNJB1_MOUSE DnaJ homolog subfamily B member 1 OS=Mus musculus OX=10090 GN=Dnajb1 PE=1 SV=3
111510000	119480000	124840000	131620000	118770000	138090000	122110000	0.69531	-0.10594	Dnajb11	sp|Q99KV1|DJB11_MOUSE DnaJ homolog subfamily B member 11 OS=Mus musculus OX=10090 GN=Dnajb11 PE=1 SV=1
12847000	10182000	14911000	9520400	15657000	15303000	9386400	0.0258994	0.0206776	Dnajb12	sp|Q9QYI4|DJB12_MOUSE DnaJ homolog subfamily B member 12 OS=Mus musculus OX=10090 GN=Dnajb12 PE=1 SV=2
1202100	949390	174660	8900400	9336000	11808000	21564000	1.74187	-4.05655	Dnajb13	sp|Q80Y75|DJB13_MOUSE DnaJ homolog subfamily B member 13 OS=Mus musculus OX=10090 GN=Dnajb13 PE=1 SV=1
13872000	8720300	19753000	18777000	14911000	23925000	37106000	0.720087	-0.746414	Dnajb2	sp|Q9QYI5|DNJB2_MOUSE DnaJ homolog subfamily B member 2 OS=Mus musculus OX=10090 GN=Dnajb2 PE=1 SV=3
174660	174660	49559000	13878000	15882000	30448000	27898000	0.138058	-0.404922	Dnajb3	sp|O35723|DNJB3_MOUSE DnaJ homolog subfamily B member 3 OS=Mus musculus OX=10090 GN=Dnajb3 PE=2 SV=1
5467200	7264600	174660	11899000	10919000	9348000	14829000	1.67741	-1.44938	Dnajb4	sp|Q9D832|DNJB4_MOUSE DnaJ homolog subfamily B member 4 OS=Mus musculus OX=10090 GN=Dnajb4 PE=1 SV=1
14489000	9995100	13164000	10253000	15328000	20104000	21008000	0.609982	-0.409921	Dnajb6	sp|O54946|DNJB6_MOUSE DnaJ homolog subfamily B member 6 OS=Mus musculus OX=10090 GN=Dnajb6 PE=1 SV=4
9744300	13348000	16753000	10452000	11895000	14333000	10084000	0.32697	0.184049	Dnajb9	sp|Q9QYI6|DNJB9_MOUSE DnaJ homolog subfamily B member 9 OS=Mus musculus OX=10090 GN=Dnajb9 PE=1 SV=2
12905000	13924000	174660	8800900	9810500	7252900	10507000	0.00803443	-0.014608	Dnajc1	sp|Q61712|DNJC1_MOUSE DnaJ homolog subfamily C member 1 OS=Mus musculus OX=10090 GN=Dnajc1 PE=1 SV=1
23272000	21750000	21324000	22028000	21891000	23896000	31572000	0.435921	-0.16801	Dnajc10	sp|Q9DC23|DJC10_MOUSE DnaJ homolog subfamily C member 10 OS=Mus musculus OX=10090 GN=Dnajc10 PE=1 SV=2
31222000	29829000	31796000	35882000	34957000	28733000	36193000	0.65792	-0.133147	Dnajc11	sp|Q5U458|DJC11_MOUSE DnaJ homolog subfamily C member 11 OS=Mus musculus OX=10090 GN=Dnajc11 PE=1 SV=2
69610000	51114000	58816000	63436000	60870000	59875000	68594000	0.27042	-0.078511	Dnajc13	tr|D4AFX7|D4AFX7_MOUSE DnaJ heat shock protein family (Hsp40) member C13 OS=Mus musculus OX=10090 GN=Dnajc13 PE=1 SV=1
4544600	174660	8315900	11245000	12066000	9112800	7058700	1.17016	-1.18377	Dnajc15	sp|Q78YY6|DJC15_MOUSE DnaJ homolog subfamily C member 15 OS=Mus musculus OX=10090 GN=Dnajc15 PE=1 SV=1
6498100	3374200	174660	4055600	5540000	4323600	9696600	0.534091	-0.817956	Dnajc16	sp|Q80TN4|DJC16_MOUSE DnaJ homolog subfamily C member 16 OS=Mus musculus OX=10090 GN=Dnajc16 PE=1 SV=2
8702600	10895000	9965300	15489000	8889000	6925900	16594000	0.305597	-0.281137	Dnajc17	sp|Q91WT4|DJC17_MOUSE DnaJ homolog subfamily C member 17 OS=Mus musculus OX=10090 GN=Dnajc17 PE=1 SV=2
12858000	11809000	13310000	13511000	14618000	14356000	16953000	1.16815	-0.231222	Dnajc19	sp|Q9CQV7|TIM14_MOUSE Mitochondrial import inner membrane translocase subunit TIM14 OS=Mus musculus OX=10090 GN=Dnajc19 PE=1 SV=3
26070000	29877000	26366000	26113000	31680000	36390000	37557000	0.820294	-0.263464	Dnajc2	sp|P54103|DNJC2_MOUSE DnaJ homolog subfamily C member 2 OS=Mus musculus OX=10090 GN=Dnajc2 PE=1 SV=2
13637000	14793000	11547000	10966000	13293000	14878000	14437000	0.0174693	-0.00732531	Dnajc21	sp|E9Q8D0|DJC21_MOUSE DnaJ homolog subfamily C member 21 OS=Mus musculus OX=10090 GN=Dnajc21 PE=1 SV=1
11388000	46519000	44714000	32211000	43306000	32722000	15399000	0.102317	0.146241	Dnajc24	sp|Q91ZF0|DJC24_MOUSE DnaJ homolog subfamily C member 24 OS=Mus musculus OX=10090 GN=Dnajc24 PE=1 SV=4
6258500	6547800	9970900	5428100	3842700	8290300	5298400	0.581602	0.409834	Dnajc25	sp|A2ALW5|DJC25_MOUSE DnaJ homolog subfamily C member 25 OS=Mus musculus OX=10090 GN=Dnajc25 PE=1 SV=1
50963000	41339000	55270000	59615000	57735000	73983000	77272000	1.33818	-0.44903	Dnajc3	sp|Q91YW3|DNJC3_MOUSE DnaJ homolog subfamily C member 3 OS=Mus musculus OX=10090 GN=Dnajc3 PE=1 SV=1
28450000	27565000	25169000	17356000	17605000	27407000	39701000	0.0883098	0.0847601	Dnajc5	sp|P60904|DNJC5_MOUSE DnaJ homolog subfamily C member 5 OS=Mus musculus OX=10090 GN=Dnajc5 PE=1 SV=1
75415000	51460000	63066000	76505000	89118000	78561000	80974000	1.37093	-0.360552	Dnajc7	sp|Q9QYI3|DNJC7_MOUSE DnaJ homolog subfamily C member 7 OS=Mus musculus OX=10090 GN=Dnajc7 PE=1 SV=2
92616000	87097000	115980000	127820000	146660000	144000000	121820000	1.78032	-0.454623	Dnajc8	sp|Q6NZB0|DNJC8_MOUSE DnaJ homolog subfamily C member 8 OS=Mus musculus OX=10090 GN=Dnajc8 PE=1 SV=2
47511000	49226000	56851000	44278000	40574000	36711000	33528000	1.71336	0.400988	Dnajc9	sp|Q91WN1|DNJC9_MOUSE DnaJ homolog subfamily C member 9 OS=Mus musculus OX=10090 GN=Dnajc9 PE=1 SV=2
2460700	1727300	3760900	3047100	6979600	5336400	7917500	1.17585	-1.13526	Dnal1	sp|Q05A62|DNAL1_MOUSE Dynein light chain 1, axonemal OS=Mus musculus OX=10090 GN=Dnal1 PE=1 SV=2
7844900	174660	5610500	6867900	20448000	11548000	5842000	0.720953	-1.29864	Dnal4	sp|Q9DCM4|DNAL4_MOUSE Dynein light chain 4, axonemal OS=Mus musculus OX=10090 GN=Dnal4 PE=3 SV=2
22842000	2289700	13175000	32733000	33374000	41473000	43340000	2.07658	-1.56308	Dnali1	sp|Q8BVN8|IDLC_MOUSE Axonemal dynein light intermediate polypeptide 1 OS=Mus musculus OX=10090 GN=Dnali1 PE=1 SV=1
104240000	111230000	145160000	104560000	114770000	131250000	129700000	0.00357033	0.00168118	Dnm1l	sp|Q8K1M6|DNM1L_MOUSE Dynamin-1-like protein OS=Mus musculus OX=10090 GN=Dnm1l PE=1 SV=2
97075000	77916000	92381000	97372000	102490000	104510000	116090000	1.1993	-0.23809	Dnm2	sp|P39054|DYN2_MOUSE Dynamin-2 OS=Mus musculus OX=10090 GN=Dnm2 PE=1 SV=2
26004000	24406000	23259000	30130000	32528000	38141000	47777000	1.36103	-0.597034	Dnm3	sp|Q8BZ98|DYN3_MOUSE Dynamin-3 OS=Mus musculus OX=10090 GN=Dnm3 PE=1 SV=1
7034000	12703000	6067600	11399000	7021100	7546400	20989000	0.310951	-0.448628	Dnmbp	sp|Q6TXD4|DNMBP_MOUSE Dynamin-binding protein OS=Mus musculus OX=10090 GN=Dnmbp PE=1 SV=2
27557000	23990000	29560000	19394000	20669000	20754000	22027000	2.07324	0.384467	Dnmt1	sp|P13864|DNMT1_MOUSE DNA (cytosine-5)-methyltransferase 1 OS=Mus musculus OX=10090 GN=Dnmt1 PE=1 SV=5
7323200	8153600	6222100	9531800	7102200	14232000	8950900	0.693992	-0.460721	Dnmt3a	sp|O88508|DNM3A_MOUSE DNA (cytosine-5)-methyltransferase 3A OS=Mus musculus OX=10090 GN=Dnmt3a PE=1 SV=2
226020000	187740000	207660000	256980000	299780000	390040000	465290000	1.32206	-0.769154	Dnpep	sp|Q9Z2W0|DNPEP_MOUSE Aspartyl aminopeptidase OS=Mus musculus OX=10090 GN=Dnpep PE=1 SV=2
29616000	23603000	30038000	27248000	32674000	36909000	56105000	0.642501	-0.462247	Dnph1	sp|Q80VJ3|DNPH1_MOUSE 2-deoxynucleoside 5-phosphate N-hydrolase 1 OS=Mus musculus OX=10090 GN=Dnph1 PE=1 SV=2
20514000	14457000	10751000	12807000	13647000	16112000	17340000	0.0336097	0.0252255	Dnttip1	sp|Q99LB0|TDIF1_MOUSE Deoxynucleotidyltransferase terminal-interacting protein 1 OS=Mus musculus OX=10090 GN=Dnttip1 PE=1 SV=1
213790000	243810000	183750000	186940000	131490000	105570000	86968000	1.47795	0.742916	Dnttip2	sp|Q8R2M2|TDIF2_MOUSE Deoxynucleotidyltransferase terminal-interacting protein 2 OS=Mus musculus OX=10090 GN=Dnttip2 PE=1 SV=1
12238000	14903000	15116000	10029000	11520000	11987000	11609000	1.53049	0.319662	Dock1	sp|Q8BUR4|DOCK1_MOUSE Dedicator of cytokinesis protein 1 OS=Mus musculus OX=10090 GN=Dock1 PE=1 SV=3
43575000	174660	43835000	45386000	31425000	50109000	60439000	0.575979	-0.682018	Dock3	sp|Q8CIQ7|DOCK3_MOUSE Dedicator of cytokinesis protein 3 OS=Mus musculus OX=10090 GN=Dock3 PE=1 SV=1
14604000	18241000	15611000	174660	16189000	174660	174660	1.2544	1.95074	Dock5	sp|B2RY04|DOCK5_MOUSE Dedicator of cytokinesis protein 5 OS=Mus musculus OX=10090 GN=Dock5 PE=1 SV=2
5510500	4805700	5556300	6518400	8209100	6619000	9096400	1.52578	-0.524539	Dock6	sp|Q8VDR9|DOCK6_MOUSE Dedicator of cytokinesis protein 6 OS=Mus musculus OX=10090 GN=Dock6 PE=1 SV=4
43683000	35073000	39381000	29137000	34268000	34187000	37763000	0.921821	0.21875	Dock7	sp|Q8R1A4|DOCK7_MOUSE Dedicator of cytokinesis protein 7 OS=Mus musculus OX=10090 GN=Dock7 PE=1 SV=3
6303300	7527400	7136900	4980600	5271100	4182000	3929500	2.37321	0.606382	Dock9	sp|Q8BIK4|DOCK9_MOUSE Dedicator of cytokinesis protein 9 OS=Mus musculus OX=10090 GN=Dock9 PE=1 SV=2
15916000	13000000	16809000	19256000	13675000	15430000	25269000	0.43653	-0.272273	Dohh	sp|Q99LN9|DOHH_MOUSE Deoxyhypusine hydroxylase OS=Mus musculus OX=10090 GN=Dohh PE=1 SV=2
11029000	8750100	14004000	9644900	9725000	18406000	22460000	0.412578	-0.419284	Donson	sp|Q9QXP4|DONS_MOUSE Protein downstream neighbor of Son OS=Mus musculus OX=10090 GN=Donson PE=1 SV=2
16258000	11604000	12815000	15469000	24207000	15930000	13462000	0.557136	-0.348767	Dopey1	sp|Q8BL99|DOP1_MOUSE Protein dopey-1 OS=Mus musculus OX=10090 GN=Dop1a PE=1 SV=2
24179000	174660	174660	28617000	20645000	16379000	30989000	1.01651	-1.56299	Dot1l	tr|Q6XZL8|Q6XZL8_MOUSE Histone-lysine N-methyltransferase, H3 lysine-79 specific OS=Mus musculus OX=10090 GN=Dot1l PE=1 SV=1
7953000	5704900	6422400	8165600	14219000	14650000	19611000	1.33808	-1.08115	Dpcd	sp|Q8BPA8|DPCD_MOUSE Protein DPCD OS=Mus musculus OX=10090 GN=Dpcd PE=1 SV=1
44674000	66048000	37450000	34349000	32188000	42245000	43229000	0.679968	0.378135	Dpep1	sp|P31428|DPEP1_MOUSE Dipeptidase 1 OS=Mus musculus OX=10090 GN=Dpep1 PE=1 SV=2
377190000	203330000	229230000	353790000	470950000	399140000	517160000	1.33955	-0.689363	Dpep3	sp|Q9DA79|DPEP3_MOUSE Dipeptidase 3 OS=Mus musculus OX=10090 GN=Dpep3 PE=1 SV=1
54311000	54800000	85620000	43160000	31062000	40491000	48161000	1.26743	0.672764	Dpf2	sp|Q61103|REQU_MOUSE Zinc finger protein ubi-d4 OS=Mus musculus OX=10090 GN=Dpf2 PE=1 SV=1
6391100	17585000	6622700	5913700	3487700	6463900	1577800	0.843307	1.22586	Dpf3	sp|P58269|DPF3_MOUSE Zinc finger protein DPF3 OS=Mus musculus OX=10090 GN=Dpf3 PE=1 SV=2
5631300	3848900	4997100	5540200	6266800	2914800	5302700	0.0660218	-0.0529362	Dph2	sp|Q9CR25|DPH2_MOUSE 2-(3-amino-3-carboxypropyl)histidine synthase subunit 2 OS=Mus musculus OX=10090 GN=Dph2 PE=1 SV=1
12258000	174660	174660	7406200	8320700	938510	6298400	0.149206	-0.450063	Dph5	sp|Q9CWQ0|DPH5_MOUSE Diphthine methyl ester synthase OS=Mus musculus OX=10090 GN=Dph5 PE=1 SV=2
3287700	5544200	2924300	3371900	174660	4051100	3723600	0.368508	0.469425	Dph6	sp|Q9CQ28|DPH6_MOUSE Diphthine--ammonia ligase OS=Mus musculus OX=10090 GN=Dph6 PE=1 SV=1
30846000	32875000	23856000	31848000	34449000	32051000	42966000	0.765936	-0.275243	Dpm1	sp|O70152|DPM1_MOUSE Dolichol-phosphate mannosyltransferase subunit 1 OS=Mus musculus OX=10090 GN=Dpm1 PE=1 SV=1
174660	174660	47496000	174660	31886000	174660	55513000	0.105807	-0.459956	Dpm3	sp|Q9D1Q4|DPM3_MOUSE Dolichol-phosphate mannosyltransferase subunit 3 OS=Mus musculus OX=10090 GN=Dpm3 PE=1 SV=1
113810000	125440000	113760000	112880000	124750000	125960000	111590000	0.0718986	-0.0137276	Dpp3	sp|Q99KK7|DPP3_MOUSE Dipeptidyl peptidase 3 OS=Mus musculus OX=10090 GN=Dpp3 PE=1 SV=2
5630300	8369300	6839100	9210700	7388300	7052400	7804900	0.469634	-0.179046	Dpp7	sp|Q9ET22|DPP2_MOUSE Dipeptidyl peptidase 2 OS=Mus musculus OX=10090 GN=Dpp7 PE=1 SV=2
1689200	1630300	174660	1267500	174660	1031300	1459500	0.126467	0.244368	Dpp8	sp|Q80YA7|DPP8_MOUSE Dipeptidyl peptidase 8 OS=Mus musculus OX=10090 GN=Dpp8 PE=1 SV=1
2565000	5523100	8082300	6952300	4042300	5139600	9346200	0.200436	-0.240995	Dpp9	sp|Q8BVG4|DPP9_MOUSE Dipeptidyl peptidase 9 OS=Mus musculus OX=10090 GN=Dpp9 PE=1 SV=2
20156000	48965000	23885000	791710	174660	20612000	174660	1.34221	2.51114	Dpt	sp|Q9QZZ6|DERM_MOUSE Dermatopontin OS=Mus musculus OX=10090 GN=Dpt PE=1 SV=1
174660	174660	174660	174660	174660	1013400	27240000	0.377671	-5.35546	Dpy19l1	sp|A6X919|D19L1_MOUSE Probable C-mannosyltransferase DPY19L1 OS=Mus musculus OX=10090 GN=Dpy19l1 PE=1 SV=1
6099700	7506600	2164400	9452200	10683000	20431000	21199000	1.31455	-1.55451	Dpy19l2	sp|P0CW70|D19L2_MOUSE Probable C-mannosyltransferase DPY19L2 OS=Mus musculus OX=10090 GN=Dpy19l2 PE=1 SV=1
39778000	36421000	34711000	28268000	26605000	36376000	42534000	0.323897	0.144532	Dpy30	sp|Q99LT0|DPY30_MOUSE Protein dpy-30 homolog OS=Mus musculus OX=10090 GN=Dpy30 PE=1 SV=1
5934700	4997500	5198400	174660	5860500	2746700	174660	0.959279	1.26383	Dpyd	sp|Q8CHR6|DPYD_MOUSE Dihydropyrimidine dehydrogenase [NADP(+)] OS=Mus musculus OX=10090 GN=Dpyd PE=1 SV=1
314500000	403640000	445290000	334470000	312280000	282810000	284050000	1.20009	0.354117	Dpysl2	sp|O08553|DPYL2_MOUSE Dihydropyrimidinase-related protein 2 OS=Mus musculus OX=10090 GN=Dpysl2 PE=1 SV=2
65479000	84532000	78911000	49034000	58898000	46393000	42612000	2.11983	0.632159	Dpysl3	sp|Q62188|DPYL3_MOUSE Dihydropyrimidinase-related protein 3 OS=Mus musculus OX=10090 GN=Dpysl3 PE=1 SV=1
91994000	91703000	68137000	86187000	80280000	62304000	64906000	0.494318	0.19328	Dpysl4	sp|O35098|DPYL4_MOUSE Dihydropyrimidinase-related protein 4 OS=Mus musculus OX=10090 GN=Dpysl4 PE=1 SV=1
46893000	47028000	51699000	45895000	52365000	45359000	42838000	0.2893	0.0584031	Dpysl5	sp|Q9EQF6|DPYL5_MOUSE Dihydropyrimidinase-related protein 5 OS=Mus musculus OX=10090 GN=Dpysl5 PE=1 SV=1
235810000	225180000	385460000	566950000	380800000	403540000	322720000	0.882925	-0.568774	Dr1	sp|Q91WV0|NC2B_MOUSE Protein Dr1 OS=Mus musculus OX=10090 GN=Dr1 PE=1 SV=1
45809000	30794000	34434000	45195000	45449000	66295000	86043000	0.964071	-0.714771	Drap1	sp|Q9D6N5|NC2A_MOUSE Dr1-associated corepressor OS=Mus musculus OX=10090 GN=Drap1 PE=1 SV=3
2872700	174660	4830100	9308900	15581000	18293000	32147000	1.41382	-2.84238	Drc1	sp|Q3USS3|DRC1_MOUSE Dynein regulatory complex protein 1 OS=Mus musculus OX=10090 GN=Drc1 PE=1 SV=1
2221000	21221000	16005000	5082800	21290000	8155800	20615000	0.0316979	-0.0682404	Drc7	sp|Q6V3W6|DRC7_MOUSE Dynein regulatory complex subunit 7 OS=Mus musculus OX=10090 GN=Drc7 PE=1 SV=4
56034000	61159000	76670000	53464000	59385000	60037000	64347000	0.393964	0.12377	Drg1	sp|P32233|DRG1_MOUSE Developmentally-regulated GTP-binding protein 1 OS=Mus musculus OX=10090 GN=Drg1 PE=1 SV=1
9708900	12700000	12737000	10516000	20568000	16377000	20689000	0.881117	-0.54032	Drg2	sp|Q9QXB9|DRG2_MOUSE Developmentally-regulated GTP-binding protein 2 OS=Mus musculus OX=10090 GN=Drg2 PE=1 SV=1
7647700	11601000	8422600	12918000	174660	8896200	5958600	0.274444	0.400711	Dscr3	sp|O35075|VP26C_MOUSE Vacuolar protein sorting-associated protein 26C OS=Mus musculus OX=10090 GN=Vps26c PE=1 SV=1
174660	174660	174660	16622000	8719600	13560000	18037000	2.65555	-6.34871	Dsg4	sp|Q7TMD7|DSG4_MOUSE Desmoglein-4 OS=Mus musculus OX=10090 GN=Dsg4 PE=2 SV=1
4874000	3187900	4491900	4059700	174660	4415800	1902600	0.568066	0.665541	Dsn1	sp|Q9CYC5|DSN1_MOUSE Kinetochore-associated protein DSN1 homolog OS=Mus musculus OX=10090 GN=Dsn1 PE=1 SV=1
16919000	19924000	14007000	26611000	6481300	6346400	7634900	0.366694	0.526367	Dsp	sp|E9Q557|DESP_MOUSE Desmoplakin OS=Mus musculus OX=10090 GN=Dsp PE=1 SV=1
27285000	29746000	10508000	57757000	174660	10199000	18791000	0.0167033	0.0510426	Dst	sp|Q91ZU6|DYST_MOUSE Dystonin OS=Mus musculus OX=10090 GN=Dst PE=1 SV=2
262860000	339510000	243360000	246570000	245650000	205410000	188860000	0.997809	0.34713	Dstn	sp|Q9R0P5|DEST_MOUSE Destrin OS=Mus musculus OX=10090 GN=Dstn PE=1 SV=3
13308000	18562000	15928000	22845000	13947000	13750000	13253000	0.00176753	-0.0014556	Dtd1	sp|Q9DD18|DTD1_MOUSE D-aminoacyl-tRNA deacylase 1 OS=Mus musculus OX=10090 GN=Dtd1 PE=1 SV=2
23200000	31424000	53132000	33281000	53009000	25695000	33565000	0.0154662	-0.0187091	Dtd2	sp|Q8BHA3|DTD2_MOUSE D-aminoacyl-tRNA deacylase 2 OS=Mus musculus OX=10090 GN=Dtd2 PE=1 SV=1
6767700	5450000	5133100	4866300	4287700	3235400	3090400	1.48149	0.579653	Dtl	sp|Q3TLR7|DTL_MOUSE Denticleless protein homolog OS=Mus musculus OX=10090 GN=Dtl PE=1 SV=2
14905000	18175000	30572000	19669000	12071000	21736000	19667000	0.250455	0.214524	Dtna	sp|Q9D2N4|DTNA_MOUSE Dystrobrevin alpha OS=Mus musculus OX=10090 GN=Dtna PE=1 SV=2
8293700	4776200	5493700	4804300	174660	174660	2028600	1.41426	1.78501	Dtnbp1	sp|Q91WZ8|DTBP1_MOUSE Dysbindin OS=Mus musculus OX=10090 GN=Dtnbp1 PE=1 SV=1
174660	174660	174660	174660	174660	174660	174660	#DIV/0!	0	Dtx2	sp|Q8R3P2|DTX2_MOUSE Probable E3 ubiquitin-protein ligase DTX2 OS=Mus musculus OX=10090 GN=Dtx2 PE=1 SV=2
4740200	174660	174660	174660	3350700	6598600	4029000	0.394753	-1.06046	Dtx3	sp|Q80V91|DTX3_MOUSE Probable E3 ubiquitin-protein ligase DTX3 OS=Mus musculus OX=10090 GN=Dtx3 PE=1 SV=2
51760000	51246000	56451000	58946000	80679000	79947000	70416000	1.58702	-0.447788	Dtymk	sp|P97930|KTHY_MOUSE Thymidylate kinase OS=Mus musculus OX=10090 GN=Dtymk PE=1 SV=2
64761000	174660	174660	174660	174660	18990000	31651000	0.170145	0.7677	Dus2	sp|Q9D7B1|DUS2L_MOUSE tRNA-dihydrouridine(20) synthase [NAD(P)+]-like OS=Mus musculus OX=10090 GN=Dus2 PE=1 SV=1
34406000	30176000	28676000	25944000	28776000	33165000	41596000	0.10979	-0.0584035	Dus3l	sp|Q91XI1|DUS3L_MOUSE tRNA-dihydrouridine(47) synthase [NAD(P)(+)]-like OS=Mus musculus OX=10090 GN=Dus3l PE=1 SV=1
41020000	29254000	46170000	35676000	59091000	53032000	54592000	0.766201	-0.382471	Dusp3	sp|Q9D7X3|DUS3_MOUSE Dual specificity protein phosphatase 3 OS=Mus musculus OX=10090 GN=Dusp3 PE=1 SV=1
30378000	23963000	5958400	174660	174660	20675000	18194000	0.516358	1.03565	Dusp9	tr|Q7TNL7|Q7TNL7_MOUSE Dual specificity protein phosphatase OS=Mus musculus OX=10090 GN=Dusp9 PE=1 SV=1
147010000	151020000	131390000	170280000	154870000	169230000	186480000	1.50248	-0.249931	Dut	tr|Q8VCG1|Q8VCG1_MOUSE Deoxyuridine 5-triphosphate nucleotidohydrolase OS=Mus musculus OX=10090 GN=Dut PE=1 SV=1
9318400	1221100	874120	5374300	18855000	14014000	17425000	1.19707	-1.87106	Dvl1	sp|P51141|DVL1_MOUSE Segment polarity protein dishevelled homolog DVL-1 OS=Mus musculus OX=10090 GN=Dvl1 PE=1 SV=2
17870000	17334000	18105000	20983000	20298000	21658000	30218000	0.991969	-0.390248	Dvl2	sp|Q60838|DVL2_MOUSE Segment polarity protein dishevelled homolog DVL-2 OS=Mus musculus OX=10090 GN=Dvl2 PE=1 SV=2
12440000	14346000	12278000	8981600	10962000	10170000	13321000	0.866551	0.262032	Dxo	sp|O70348|DXO_MOUSE Decapping and exoribonuclease protein OS=Mus musculus OX=10090 GN=Dxo PE=1 SV=2
29234000	174660	12914000	2087600	174660	21706000	22355000	0.0908579	0.284731	Dym	sp|Q8CHY3|DYM_MOUSE Dymeclin OS=Mus musculus OX=10090 GN=Dym PE=1 SV=1
257260000	204190000	240670000	243370000	271780000	305130000	315490000	1.06252	-0.278844	Dync1h1	sp|Q9JHU4|DYHC1_MOUSE Cytoplasmic dynein 1 heavy chain 1 OS=Mus musculus OX=10090 GN=Dync1h1 PE=1 SV=2
10189000	12334000	15411000	11995000	15641000	9504200	11800000	0.074136	0.047509	Dync1i1	sp|O88485|DC1I1_MOUSE Cytoplasmic dynein 1 intermediate chain 1 OS=Mus musculus OX=10090 GN=Dync1i1 PE=1 SV=2
85060000	79586000	74180000	91373000	105090000	112310000	118530000	1.84628	-0.424262	Dync1i2	sp|O88487|DC1I2_MOUSE Cytoplasmic dynein 1 intermediate chain 2 OS=Mus musculus OX=10090 GN=Dync1i2 PE=1 SV=1
34391000	43320000	42032000	33758000	34066000	42590000	40895000	0.233262	0.077481	Dync1li1	sp|Q8R1Q8|DC1L1_MOUSE Cytoplasmic dynein 1 light intermediate chain 1 OS=Mus musculus OX=10090 GN=Dync1li1 PE=1 SV=1
117660000	135990000	119550000	131640000	140740000	146420000	142080000	1.3128	-0.172706	Dync1li2	sp|Q6PDL0|DC1L2_MOUSE Cytoplasmic dynein 1 light intermediate chain 2 OS=Mus musculus OX=10090 GN=Dync1li2 PE=1 SV=2
75197000	39917000	60065000	75913000	86893000	105230000	116340000	1.39422	-0.718651	Dync2h1	sp|Q45VK7|DYHC2_MOUSE Cytoplasmic dynein 2 heavy chain 1 OS=Mus musculus OX=10090 GN=Dync2h1 PE=1 SV=1
14351000	8952100	9639100	13524000	14342000	20116000	18139000	1.20031	-0.590134	Dync2li1	sp|Q8K0T2|DC2L1_MOUSE Cytoplasmic dynein 2 light intermediate chain 1 OS=Mus musculus OX=10090 GN=Dync2li1 PE=1 SV=1
215820000	140600000	113250000	201110000	194900000	224970000	127020000	0.363405	-0.256353	Dynll1;BC048507	sp|P63168|DYL1_MOUSE Dynein light chain 1, cytoplasmic OS=Mus musculus OX=10090 GN=Dynll1 PE=1 SV=1;tr|Q80ZS7|Q80ZS7_MOUSE Dynein light chain OS=Mus musculus OX=10090 GN=BC048507 PE=1 SV=1
118230000	124720000	164110000	101860000	125680000	111590000	97500000	0.926707	0.313868	Dynll2	sp|Q9D0M5|DYL2_MOUSE Dynein light chain 2, cytoplasmic OS=Mus musculus OX=10090 GN=Dynll2 PE=1 SV=1
60461000	86761000	109520000	77361000	70585000	72474000	77623000	0.397819	0.199836	Dynlrb1	sp|P62627|DLRB1_MOUSE Dynein light chain roadblock-type 1 OS=Mus musculus OX=10090 GN=Dynlrb1 PE=1 SV=3
27762000	836660	39856000	38754000	44182000	35082000	62815000	0.909126	-0.9864	Dynlrb2	sp|Q9DAJ5|DLRB2_MOUSE Dynein light chain roadblock-type 2 OS=Mus musculus OX=10090 GN=Dynlrb2 PE=1 SV=1
96121000	93596000	105720000	104090000	252040000	110430000	115720000	0.501414	-0.563825	Dynlt1	sp|P51807|DYLT1_MOUSE Dynein light chain Tctex-type 1 OS=Mus musculus OX=10090 GN=Dynlt1 PE=1 SV=1
6806500	4579600	4202200	6225000	2759100	7953900	9926100	0.332438	-0.370178	Dyrk1b	sp|Q9Z188|DYR1B_MOUSE Dual specificity tyrosine-phosphorylation-regulated kinase 1B OS=Mus musculus OX=10090 GN=Dyrk1b PE=1 SV=3
31737000	13601000	21162000	30684000	31797000	25940000	43084000	0.847351	-0.568654	Dyx1c1	sp|Q8R368|DAAF4_MOUSE Dynein assembly factor 4, axonemal OS=Mus musculus OX=10090 GN=Dnaaf4 PE=1 SV=2
174660	174660	174660	174660	174660	174660	174660	#DIV/0!	0	E2f4	sp|Q8R0K9|E2F4_MOUSE Transcription factor E2F4 OS=Mus musculus OX=10090 GN=E2f4 PE=1 SV=1
5459000	3806200	3170100	7024000	5493000	4436500	174660	0.025388	-0.0468914	Eapp	sp|Q5BU09|EAPP_MOUSE E2F-associated phosphoprotein OS=Mus musculus OX=10090 GN=Eapp PE=1 SV=2
36695000	40451000	37637000	37097000	32200000	35079000	34545000	1.16889	0.139682	Ears2	sp|Q9CXJ1|SYEM_MOUSE Probable glutamate--tRNA ligase, mitochondrial OS=Mus musculus OX=10090 GN=Ears2 PE=1 SV=1
12918000	174660	6531900	6155400	8004100	174660	8619300	0.0745882	0.188986	Ebag9	sp|Q9D0V7|RCAS1_MOUSE Receptor-binding cancer antigen expressed on SiSo cells OS=Mus musculus OX=10090 GN=Ebag9 PE=1 SV=2
34616000	39544000	28654000	31002000	31864000	23752000	18540000	0.849689	0.382516	Ebna1bp2	sp|Q9D903|EBP2_MOUSE Probable rRNA-processing protein EBP2 OS=Mus musculus OX=10090 GN=Ebna1bp2 PE=2 SV=1
100020000	106410000	122900000	133120000	79145000	246180000	95249000	0.258286	-0.334517	Ebp	sp|P70245|EBP_MOUSE 3-beta-hydroxysteroid-Delta(8),Delta(7)-isomerase OS=Mus musculus OX=10090 GN=Ebp PE=1 SV=3
6463000	4508100	7568800	174660	8522800	4004300	8851800	0.114223	0.197745	Ebpl	sp|Q9D0P0|EBPL_MOUSE Emopamil-binding protein-like OS=Mus musculus OX=10090 GN=Ebpl PE=2 SV=1
9499500	8823300	6737300	8228300	6239500	8813100	10388000	0.0174571	-0.0109869	Ecd	sp|Q9CS74|ECD_MOUSE Protein ecdysoneless homolog OS=Mus musculus OX=10090 GN=Ecd PE=1 SV=2
67480000	99136000	75334000	70898000	84855000	74258000	55435000	0.370125	0.176529	Ech1	sp|O35459|ECH1_MOUSE Delta(3,5)-Delta(2,4)-dienoyl-CoA isomerase, mitochondrial OS=Mus musculus OX=10090 GN=Ech1 PE=1 SV=1
4862100	7121300	8008100	13129000	4904100	4105100	3149400	0.041677	0.0759941	Echdc1	sp|Q9D9V3|ECHD1_MOUSE Ethylmalonyl-CoA decarboxylase OS=Mus musculus OX=10090 GN=Echdc1 PE=1 SV=2
29379000	26930000	24853000	17265000	27717000	14428000	18468000	1.05871	0.474626	Echdc2	sp|Q3TLP5|ECHD2_MOUSE Enoyl-CoA hydratase domain-containing protein 2, mitochondrial OS=Mus musculus OX=10090 GN=Echdc2 PE=1 SV=2
14301000	18224000	11698000	8034400	8744500	14774000	15150000	0.499428	0.336322	Echdc3	sp|Q9D7J9|ECHD3_MOUSE Enoyl-CoA hydratase domain-containing protein 3, mitochondrial OS=Mus musculus OX=10090 GN=Echdc3 PE=1 SV=1
192510000	309940000	243630000	182570000	267140000	231650000	237230000	0.213515	0.114947	Echs1	sp|Q8BH95|ECHM_MOUSE Enoyl-CoA hydratase, mitochondrial OS=Mus musculus OX=10090 GN=Echs1 PE=1 SV=1
86491000	165250000	121780000	105570000	133500000	106840000	96337000	0.266698	0.171374	Eci1	sp|P42125|ECI1_MOUSE Enoyl-CoA delta isomerase 1, mitochondrial OS=Mus musculus OX=10090 GN=Eci1 PE=1 SV=2
51811000	70118000	51508000	59029000	61347000	62717000	51802000	0.0539373	-0.0225668	Eci2	sp|Q9WUR2|ECI2_MOUSE Enoyl-CoA delta isomerase 2 OS=Mus musculus OX=10090 GN=Eci2 PE=1 SV=2
16053000	16935000	21044000	13775000	9960900	8637500	7835700	1.96016	0.84133	Ecm1	sp|Q61508|ECM1_MOUSE Extracellular matrix protein 1 OS=Mus musculus OX=10090 GN=Ecm1 PE=1 SV=2
57097000	59492000	67939000	60435000	68065000	62186000	74918000	0.455333	-0.1104	Ecm29	sp|Q6PDI5|ECM29_MOUSE Proteasome adapter and scaffold protein ECM29 OS=Mus musculus OX=10090 GN=Ecpas PE=1 SV=3
9513800	17825000	16476000	11985000	11527000	10328000	13967000	0.512785	0.289234	Ecsit	sp|Q9QZH6|ECSIT_MOUSE Evolutionarily conserved signaling intermediate in Toll pathway, mitochondrial OS=Mus musculus OX=10090 GN=Ecsit PE=1 SV=2
71778000	52933000	31764000	74553000	38683000	18669000	16231000	0.342671	0.494047	Ect2	sp|Q07139|ECT2_MOUSE Protein ECT2 OS=Mus musculus OX=10090 GN=Ect2 PE=1 SV=2
21644000	18616000	25501000	14367000	16637000	18038000	19812000	1.09503	0.348729	Edc3	sp|Q8K2D3|EDC3_MOUSE Enhancer of mRNA-decapping protein 3 OS=Mus musculus OX=10090 GN=Edc3 PE=1 SV=1
119740000	78272000	93774000	104410000	115590000	152280000	152720000	0.935269	-0.432369	Edc4	sp|Q3UJB9|EDC4_MOUSE Enhancer of mRNA-decapping protein 4 OS=Mus musculus OX=10090 GN=Edc4 PE=1 SV=2
66366000	50576000	69133000	62812000	68141000	58468000	39427000	0.215139	0.116532	Edf1	sp|Q9JMG1|EDF1_MOUSE Endothelial differentiation-related factor 1 OS=Mus musculus OX=10090 GN=Edf1 PE=1 SV=1
3859100	174660	3396500	3806700	3447200	4627600	5668300	0.817815	-0.824932	Edrf1	sp|Q6GQV7|EDRF1_MOUSE Erythroid differentiation-related factor 1 OS=Mus musculus OX=10090 GN=Edrf1 PE=1 SV=1
62274000	65887000	65866000	55820000	60648000	67168000	72782000	0.0438123	0.0127974	Eea1	sp|Q8BL66|EEA1_MOUSE Early endosome antigen 1 OS=Mus musculus OX=10090 GN=Eea1 PE=1 SV=2
16371000	9031000	12472000	14255000	11676000	11954000	11251000	0.0615863	0.0394649	Eed	sp|Q921E6|EED_MOUSE Polycomb protein EED OS=Mus musculus OX=10090 GN=Eed PE=1 SV=1
4794600000	4696000000	4903000000	5271300000	4368600000	4794400000	4250200000	0.175033	0.038623	Eef1a1	sp|P10126|EF1A1_MOUSE Elongation factor 1-alpha 1 OS=Mus musculus OX=10090 GN=Eef1a1 PE=1 SV=3
521530000	593850000	584780000	602680000	521350000	633670000	489140000	0.0388418	0.0128106	Eef1b	sp|O70251|EF1B_MOUSE Elongation factor 1-beta OS=Mus musculus OX=10090 GN=Eef1b PE=1 SV=5
720370000	772340000	849000000	813670000	845570000	765650000	912000000	0.503497	-0.0959042	Eef1d	sp|P57776|EF1D_MOUSE Elongation factor 1-delta OS=Mus musculus OX=10090 GN=Eef1d PE=1 SV=3
139640000	122180000	131400000	141880000	161350000	131780000	138440000	0.671133	-0.129293	Eef1e1	sp|Q9D1M4|MCA3_MOUSE Eukaryotic translation elongation factor 1 epsilon-1 OS=Mus musculus OX=10090 GN=Eef1e1 PE=1 SV=1
391600000	310760000	374250000	332510000	374090000	403170000	410350000	0.298546	-0.082652	Eef1g	sp|Q9D8N0|EF1G_MOUSE Elongation factor 1-gamma OS=Mus musculus OX=10090 GN=Eef1g PE=1 SV=3
690890000	593270000	756730000	652960000	736760000	684560000	790700000	0.274775	-0.0742891	Eef2	sp|P58252|EF2_MOUSE Elongation factor 2 OS=Mus musculus OX=10090 GN=Eef2 PE=1 SV=2
43942000	40487000	41239000	41061000	41782000	37827000	45614000	0.0532353	0.0110055	Eefsec	sp|Q9JHW4|SELB_MOUSE Selenocysteine-specific elongation factor OS=Mus musculus OX=10090 GN=Eefsec PE=1 SV=2
174660	174660	174660	174660	174660	174660	13457000	0.359928	-4.32277	Efcab10	sp|Q9D581|EFC10_MOUSE EF-hand calcium-binding domain-containing protein 10 OS=Mus musculus OX=10090 GN=Efcab10 PE=1 SV=1
18166000	7534000	8290700	24312000	9906800	10407000	16908000	0.349472	-0.441202	Efcab2	sp|Q9CQ46|DRC8_MOUSE Dynein regulatory complex protein 8 OS=Mus musculus OX=10090 GN=Efcab2 PE=1 SV=1
3858500	4762800	4211200	6518900	5846500	6522300	6647600	2.99362	-0.577653	Efcab5	sp|A0JP43|EFCB5_MOUSE EF-hand calcium-binding domain-containing protein 5 OS=Mus musculus OX=10090 GN=Efcab5 PE=1 SV=2
4342800	174660	4428600	3032600	4349100	8979900	16501000	0.646975	-1.46208	Efcab6	sp|Q6P1E8|EFCB6_MOUSE EF-hand calcium-binding domain-containing protein 6 OS=Mus musculus OX=10090 GN=Efcab6 PE=1 SV=2
9972700	9272800	7710500	24155000	10905000	21225000	23939000	1.50285	-1.15839	Efcab7	sp|Q8VDY4|EFCB7_MOUSE EF-hand calcium-binding domain-containing protein 7 OS=Mus musculus OX=10090 GN=Efcab7 PE=1 SV=1
22210000	20467000	14258000	17143000	12029000	20858000	19087000	0.222607	0.135313	Efemp1	sp|Q8BPB5|FBLN3_MOUSE EGF-containing fibulin-like extracellular matrix protein 1 OS=Mus musculus OX=10090 GN=Efemp1 PE=1 SV=1
174660	174660	174660	174660	174660	174660	174660	#DIV/0!	0	Efemp2	sp|Q9WVJ9|FBLN4_MOUSE EGF-containing fibulin-like extracellular matrix protein 2 OS=Mus musculus OX=10090 GN=Efemp2 PE=1 SV=1
33134000	110560000	48336000	35658000	44218000	47507000	79468000	0.21236	0.307777	Efhc1	sp|Q9D9T8|EFHC1_MOUSE EF-hand domain-containing protein 1 OS=Mus musculus OX=10090 GN=Efhc1 PE=1 SV=1
66920000	47655000	49245000	61128000	65183000	81362000	66135000	0.92471	-0.326016	Efhd1	sp|Q9D4J1|EFHD1_MOUSE EF-hand domain-containing protein D1 OS=Mus musculus OX=10090 GN=Efhd1 PE=1 SV=1
156640000	156750000	208140000	156820000	178700000	174210000	222930000	0.16173	-0.0753561	Efhd2	sp|Q9D8Y0|EFHD2_MOUSE EF-hand domain-containing protein D2 OS=Mus musculus OX=10090 GN=Efhd2 PE=1 SV=1
174660	16510000	10941000	7766700	174660	7200900	174660	0.513321	1.26592	Efnb1	sp|P52795|EFNB1_MOUSE Ephrin-B1 OS=Mus musculus OX=10090 GN=Efnb1 PE=1 SV=1
9024300	11493000	10678000	9352200	8479700	8885200	8549400	1.22476	0.238068	Efr3a	sp|Q8BG67|EFR3A_MOUSE Protein EFR3 homolog A OS=Mus musculus OX=10090 GN=Efr3a PE=1 SV=1
157650000	179000000	169660000	159240000	129700000	188930000	255190000	0.17306	-0.118873	Eftud1	sp|Q8C0D5|EFL1_MOUSE Elongation factor-like GTPase 1 OS=Mus musculus OX=10090 GN=Efl1 PE=1 SV=1
124480000	99019000	106750000	106490000	115040000	112840000	135740000	0.317363	-0.0944067	Eftud2	sp|O08810|U5S1_MOUSE 116 kDa U5 small nuclear ribonucleoprotein component OS=Mus musculus OX=10090 GN=Eftud2 PE=1 SV=1
6706700	6022800	4671000	11024000	7523900	4935400	9744200	0.718824	-0.518211	Egfr	sp|Q01279|EGFR_MOUSE Epidermal growth factor receptor OS=Mus musculus OX=10090 GN=Egfr PE=1 SV=1
7887600	8896000	9115700	5335400	8036300	4539700	6787300	1.281	0.483515	Egln1	sp|Q91YE3|EGLN1_MOUSE Egl nine homolog 1 OS=Mus musculus OX=10090 GN=Egln1 PE=1 SV=2
47145000	27565000	33011000	37647000	30641000	30222000	27197000	0.341701	0.192272	Ehbp1	sp|Q69ZW3|EHBP1_MOUSE EH domain-binding protein 1 OS=Mus musculus OX=10090 GN=Ehbp1 PE=1 SV=3
116500000	140490000	157300000	138850000	141000000	180120000	185620000	0.60826	-0.22494	Ehd1	sp|Q9WVK4|EHD1_MOUSE EH domain-containing protein 1 OS=Mus musculus OX=10090 GN=Ehd1 PE=1 SV=1
45757000	74949000	56825000	41324000	33757000	48367000	51269000	0.894319	0.438088	Ehd2	sp|Q8BH64|EHD2_MOUSE EH domain-containing protein 2 OS=Mus musculus OX=10090 GN=Ehd2 PE=1 SV=1
34105000	38027000	38114000	34438000	30181000	32675000	44035000	0.141919	0.0567063	Ehd4	sp|Q9EQP2|EHD4_MOUSE EH domain-containing protein 4 OS=Mus musculus OX=10090 GN=Ehd4 PE=1 SV=1
8299300	10867000	8918000	8327500	7554300	7225500	5727100	1.18649	0.37701	Ehmt1	sp|Q5DW34|EHMT1_MOUSE Histone-lysine N-methyltransferase EHMT1 OS=Mus musculus OX=10090 GN=Ehmt1 PE=1 SV=2
10076000	9493400	11100000	8392600	9566100	9256000	9472400	1.0377	0.156565	Ehmt2	sp|Q9Z148|EHMT2_MOUSE Histone-lysine N-methyltransferase EHMT2 OS=Mus musculus OX=10090 GN=Ehmt2 PE=1 SV=2
174660	174660	174660	174660	174660	174660	4116500	0.359928	-2.73165	Eid3	sp|Q3V124|EID3_MOUSE EP300-interacting inhibitor of differentiation 3 OS=Mus musculus OX=10090 GN=Eid3 PE=1 SV=1
168410000	170140000	184320000	165330000	147010000	166040000	207100000	0.066045	0.0243752	Eif1;Eif1b	sp|P48024|EIF1_MOUSE Eukaryotic translation initiation factor 1 OS=Mus musculus OX=10090 GN=Eif1 PE=1 SV=2;sp|Q9CXU9|EIF1B_MOUSE Eukaryotic translation initiation factor 1b OS=Mus musculus OX=10090 GN=Eif1b PE=1 SV=2
9661200	6056200	10299000	9371900	6708400	8173400	4910600	0.372713	0.250255	Eif1ad	sp|Q3THJ3|EIF1A_MOUSE Probable RNA-binding protein EIF1AD OS=Mus musculus OX=10090 GN=Eif1ad PE=1 SV=2
89164000	72205000	78869000	65674000	82337000	74179000	86441000	0.163302	0.0536189	Eif1ax;Eif1a	sp|Q8BMJ3|IF1AX_MOUSE Eukaryotic translation initiation factor 1A, X-chromosomal OS=Mus musculus OX=10090 GN=Eif1ax PE=2 SV=3;sp|Q60872|IF1A_MOUSE Eukaryotic translation initiation factor 1A OS=Mus musculus OX=10090 GN=Eif1a PE=2 SV=3
61771000	65368000	59338000	61231000	69786000	65377000	68932000	0.72728	-0.0937309	Eif2a	sp|Q8BJW6|EIF2A_MOUSE Eukaryotic translation initiation factor 2A OS=Mus musculus OX=10090 GN=Eif2a PE=1 SV=2
23240000	12108000	26418000	21894000	28027000	22431000	20188000	0.246964	-0.168227	Eif2b1	sp|Q99LC8|EI2BA_MOUSE Translation initiation factor eIF-2B subunit alpha OS=Mus musculus OX=10090 GN=Eif2b1 PE=1 SV=1
29612000	26962000	24056000	25031000	25199000	35381000	27691000	0.175855	-0.0757472	Eif2b2	sp|Q99LD9|EI2BB_MOUSE Translation initiation factor eIF-2B subunit beta OS=Mus musculus OX=10090 GN=Eif2b2 PE=1 SV=1
19738000	17756000	23447000	23815000	22467000	19299000	18649000	0.137566	-0.0518835	Eif2b3	tr|B1AUN2|B1AUN2_MOUSE Eukaryotic translation initiation factor 2B, subunit 3 OS=Mus musculus OX=10090 GN=Eif2b3 PE=1 SV=1
32716000	26530000	35872000	34335000	39865000	36399000	48068000	0.920824	-0.323174	Eif2b4	sp|Q61749|EI2BD_MOUSE Translation initiation factor eIF-2B subunit delta OS=Mus musculus OX=10090 GN=Eif2b4 PE=1 SV=2
38876000	39089000	46001000	38975000	42287000	46182000	51911000	0.397545	-0.117836	Eif2b5	sp|Q8CHW4|EI2BE_MOUSE Translation initiation factor eIF-2B subunit epsilon OS=Mus musculus OX=10090 GN=Eif2b5 PE=1 SV=1
201440000	191100000	178430000	187590000	228560000	190410000	240000000	0.589358	-0.15316	Eif2s1	sp|Q6ZWX6|IF2A_MOUSE Eukaryotic translation initiation factor 2 subunit 1 OS=Mus musculus OX=10090 GN=Eif2s1 PE=1 SV=3
68967000	77711000	62709000	71832000	72073000	67489000	68619000	0.0179706	-0.00428443	Eif2s2	sp|Q99L45|IF2B_MOUSE Eukaryotic translation initiation factor 2 subunit 2 OS=Mus musculus OX=10090 GN=Eif2s2 PE=1 SV=1
50022000	65162000	61977000	54676000	58321000	75492000	49875000	0.0238046	-0.0130678	Eif2s3x	sp|Q9Z0N1|IF2G_MOUSE Eukaryotic translation initiation factor 2 subunit 3, X-linked OS=Mus musculus OX=10090 GN=Eif2s3x PE=1 SV=2
118380000	138000000	114420000	137970000	117750000	134460000	128100000	0.308405	-0.068053	Eif2s3y	sp|Q9Z0N2|IF2H_MOUSE Eukaryotic translation initiation factor 2 subunit 3, Y-linked OS=Mus musculus OX=10090 GN=Eif2s3y PE=1 SV=2
125020000	123010000	139080000	137400000	138310000	150970000	167930000	1.03473	-0.204163	Eif3a	sp|P23116|EIF3A_MOUSE Eukaryotic translation initiation factor 3 subunit A OS=Mus musculus OX=10090 GN=Eif3a PE=1 SV=5
95695000	98192000	88915000	90668000	89849000	103940000	95577000	0.0580217	-0.0112987	Eif3b	sp|Q8JZQ9|EIF3B_MOUSE Eukaryotic translation initiation factor 3 subunit B OS=Mus musculus OX=10090 GN=Eif3b PE=1 SV=1
97566000	93341000	105760000	96793000	100780000	114690000	115240000	0.574445	-0.112053	Eif3c	sp|Q8R1B4|EIF3C_MOUSE Eukaryotic translation initiation factor 3 subunit C OS=Mus musculus OX=10090 GN=Eif3c PE=1 SV=1
64229000	62065000	73083000	63019000	71839000	73933000	70197000	0.350712	-0.0696666	Eif3d	sp|O70194|EIF3D_MOUSE Eukaryotic translation initiation factor 3 subunit D OS=Mus musculus OX=10090 GN=Eif3d PE=1 SV=2
92808000	67074000	72841000	77859000	80688000	94790000	81331000	0.322362	-0.109079	Eif3e	sp|P60229|EIF3E_MOUSE Eukaryotic translation initiation factor 3 subunit E OS=Mus musculus OX=10090 GN=Eif3e PE=1 SV=1
110000000	75452000	93802000	85074000	120280000	121410000	117430000	0.632107	-0.254574	Eif3f	sp|Q9DCH4|EIF3F_MOUSE Eukaryotic translation initiation factor 3 subunit F OS=Mus musculus OX=10090 GN=Eif3f PE=1 SV=2
237190000	193300000	215960000	234280000	169360000	201080000	193330000	0.355712	0.111097	Eif3g	sp|Q9Z1D1|EIF3G_MOUSE Eukaryotic translation initiation factor 3 subunit G OS=Mus musculus OX=10090 GN=Eif3g PE=1 SV=2
69778000	76456000	72286000	74570000	67867000	72095000	92808000	0.23844	-0.0770327	Eif3h	sp|Q91WK2|EIF3H_MOUSE Eukaryotic translation initiation factor 3 subunit H OS=Mus musculus OX=10090 GN=Eif3h PE=1 SV=1
123190000	112050000	115250000	108850000	112600000	99199000	115470000	0.741088	0.0996889	Eif3i	sp|Q9QZD9|EIF3I_MOUSE Eukaryotic translation initiation factor 3 subunit I OS=Mus musculus OX=10090 GN=Eif3i PE=1 SV=1
174660	174660	19223000	174660	39252000	14901000	174660	0.233732	-1.06247	Eif3j1	sp|Q3UGC7|EI3JA_MOUSE Eukaryotic translation initiation factor 3 subunit J-A OS=Mus musculus OX=10090 GN=Eif3j1 PE=2 SV=1
99956000	134600000	103160000	131220000	94744000	97327000	68017000	0.349121	0.202543	Eif3j2	sp|Q66JS6|EI3JB_MOUSE Eukaryotic translation initiation factor 3 subunit J-B OS=Mus musculus OX=10090 GN=Eif3j2 PE=1 SV=1
65793000	59136000	60600000	80767000	81986000	60419000	48903000	0.258026	-0.137322	Eif3k	sp|Q9DBZ5|EIF3K_MOUSE Eukaryotic translation initiation factor 3 subunit K OS=Mus musculus OX=10090 GN=Eif3k PE=1 SV=1
111620000	99722000	97509000	93698000	105640000	108080000	123660000	0.236306	-0.0660004	Eif3l	sp|Q8QZY1|EIF3L_MOUSE Eukaryotic translation initiation factor 3 subunit L OS=Mus musculus OX=10090 GN=Eif3l PE=1 SV=1
45595000	46017000	43281000	61076000	48489000	42412000	44479000	0.352308	-0.127353	Eif3m	sp|Q99JX4|EIF3M_MOUSE Eukaryotic translation initiation factor 3 subunit M OS=Mus musculus OX=10090 GN=Eif3m PE=1 SV=1
522760000	574210000	570640000	540820000	595060000	542300000	547750000	0.00988082	-0.0015888	Eif4a1	sp|P60843|IF4A1_MOUSE Eukaryotic initiation factor 4A-I OS=Mus musculus OX=10090 GN=Eif4a1 PE=1 SV=1
332780000	207820000	291930000	291270000	408930000	337450000	336080000	0.748385	-0.307487	Eif4a2	sp|P10630|IF4A2_MOUSE Eukaryotic initiation factor 4A-II OS=Mus musculus OX=10090 GN=Eif4a2 PE=1 SV=2
131840000	106160000	130500000	117760000	123390000	157980000	184840000	0.528669	-0.249192	Eif4a3;Gm8994	sp|Q91VC3|IF4A3_MOUSE Eukaryotic initiation factor 4A-III OS=Mus musculus OX=10090 GN=Eif4a3 PE=1 SV=3;tr|A0A0N4SVP8|A0A0N4SVP8_MOUSE RNA helicase OS=Mus musculus OX=10090 GN=Eif4a3l2 PE=3 SV=1;tr|E9PV04|E9PV04_MOUSE RNA helicase OS=Mus musculus OX=10090 G
93414000	127130000	113460000	107390000	113270000	92964000	98096000	0.365861	0.113239	Eif4b	sp|Q8BGD9|IF4B_MOUSE Eukaryotic translation initiation factor 4B OS=Mus musculus OX=10090 GN=Eif4b PE=1 SV=1
105070000	84494000	73222000	77969000	104230000	117720000	113620000	0.54805	-0.239097	Eif4e	sp|P63073|IF4E_MOUSE Eukaryotic translation initiation factor 4E OS=Mus musculus OX=10090 GN=Eif4e PE=1 SV=1
11801000	12053000	15704000	9505600	9009000	19584000	13528000	0.0309393	0.0308924	Eif4e2	sp|Q8BMB3|IF4E2_MOUSE Eukaryotic translation initiation factor 4E type 2 OS=Mus musculus OX=10090 GN=Eif4e2 PE=1 SV=1
6667900	13528000	11565000	6715300	5901100	12077000	15606000	0.0557849	0.0715309	Eif4ebp1	sp|Q60876|4EBP1_MOUSE Eukaryotic translation initiation factor 4E-binding protein 1 OS=Mus musculus OX=10090 GN=Eif4ebp1 PE=1 SV=3
18026000	14520000	9534400	8262800	11891000	24286000	13262000	0.0296788	-0.0404304	Eif4ebp2	sp|P70445|4EBP2_MOUSE Eukaryotic translation initiation factor 4E-binding protein 2 OS=Mus musculus OX=10090 GN=Eif4ebp2 PE=1 SV=1
13682000	18137000	13629000	20008000	19522000	15965000	14857000	0.569389	-0.215337	Eif4enif1	sp|Q9EST3|4ET_MOUSE Eukaryotic translation initiation factor 4E transporter OS=Mus musculus OX=10090 GN=Eif4enif1 PE=1 SV=2
72356000	86896000	85796000	76102000	68204000	73589000	79110000	0.744547	0.137615	Eif4g1	sp|Q6NZJ6|IF4G1_MOUSE Eukaryotic translation initiation factor 4 gamma 1 OS=Mus musculus OX=10090 GN=Eif4g1 PE=1 SV=1
100040000	109720000	102900000	118440000	118680000	104100000	125970000	1.05918	-0.164377	Eif4g2	sp|Q62448|IF4G2_MOUSE Eukaryotic translation initiation factor 4 gamma 2 OS=Mus musculus OX=10090 GN=Eif4g2 PE=1 SV=2
41011000	33156000	35547000	44147000	46234000	59166000	57253000	1.56437	-0.499451	Eif4g3	sp|Q80XI3|IF4G3_MOUSE Eukaryotic translation initiation factor 4 gamma 3 OS=Mus musculus OX=10090 GN=Eif4g3 PE=1 SV=2
201560000	214860000	299380000	270970000	263460000	241590000	318810000	0.490308	-0.198041	Eif4h	sp|Q9WUK2|IF4H_MOUSE Eukaryotic translation initiation factor 4H OS=Mus musculus OX=10090 GN=Eif4h PE=1 SV=3
68584000	68190000	64325000	77677000	85594000	67885000	80506000	1.20597	-0.217039	Eif5	sp|P59325|IF5_MOUSE Eukaryotic translation initiation factor 5 OS=Mus musculus OX=10090 GN=Eif5 PE=1 SV=1
334590000	400320000	444130000	511360000	447720000	455310000	287430000	0.202087	-0.114428	Eif5a	sp|P63242|IF5A1_MOUSE Eukaryotic translation initiation factor 5A-1 OS=Mus musculus OX=10090 GN=Eif5a PE=1 SV=2
164990000	159020000	178280000	188430000	178700000	177180000	168710000	0.770521	-0.0903845	Eif5b	sp|Q05D44|IF2P_MOUSE Eukaryotic translation initiation factor 5B OS=Mus musculus OX=10090 GN=Eif5b PE=1 SV=2
218680000	213000000	185250000	337100000	263630000	271830000	124340000	0.343355	-0.277304	Eif6	sp|O55135|IF6_MOUSE Eukaryotic translation initiation factor 6 OS=Mus musculus OX=10090 GN=Eif6 PE=1 SV=2
27733000	15268000	15326000	27570000	21744000	23012000	28274000	0.678313	-0.371357	Elac2	sp|Q80Y81|RNZ2_MOUSE Zinc phosphodiesterase ELAC protein 2 OS=Mus musculus OX=10090 GN=Elac2 PE=1 SV=1
399640000	393300000	352850000	414580000	459570000	427620000	442330000	1.63147	-0.191103	Elavl1	sp|P70372|ELAV1_MOUSE ELAV-like protein 1 OS=Mus musculus OX=10090 GN=Elavl1 PE=1 SV=2
13203000	5805300	7290800	11350000	9916100	7466300	17600000	0.380757	-0.40197	Elavl2;Elavl4	sp|Q60899|ELAV2_MOUSE ELAV-like protein 2 OS=Mus musculus OX=10090 GN=Elavl2 PE=1 SV=1;sp|Q61701|ELAV4_MOUSE ELAV-like protein 4 OS=Mus musculus OX=10090 GN=Elavl4 PE=1 SV=1
8518200	14175000	6934800	5670800	9083000	8958800	10651000	0.231169	0.201118	Elf2	sp|Q9JHC9|ELF2_MOUSE ETS-related transcription factor Elf-2 OS=Mus musculus OX=10090 GN=Elf2 PE=1 SV=1
43375000	45682000	49520000	47724000	37101000	44756000	41070000	0.51224	0.114676	Elmo1	sp|Q8BPU7|ELMO1_MOUSE Engulfment and cell motility protein 1 OS=Mus musculus OX=10090 GN=Elmo1 PE=1 SV=2
3514400	174660	25637000	3926500	2875800	3041200	5744600	0.374341	1.32678	Elmo2	sp|Q8BHL5|ELMO2_MOUSE Engulfment and cell motility protein 2 OS=Mus musculus OX=10090 GN=Elmo2 PE=1 SV=1
12452000	8404700	8996300	6408000	6814600	10678000	10056000	0.374956	0.229221	Elmod2	sp|Q8BGF6|ELMD2_MOUSE ELMO domain-containing protein 2 OS=Mus musculus OX=10090 GN=Elmod2 PE=1 SV=1
6107500	5716100	3431900	7370800	7453900	6102800	7701100	1.28323	-0.49309	Eln	sp|P54320|ELN_MOUSE Elastin OS=Mus musculus OX=10090 GN=Eln PE=1 SV=2
9777400	18070000	17683000	14259000	10317000	20784000	10915000	0.112108	0.109373	Elovl2	sp|Q9JLJ4|ELOV2_MOUSE Elongation of very long chain fatty acids protein 2 OS=Mus musculus OX=10090 GN=Elovl2 PE=1 SV=1
10404000	174660	17400000	37827000	24289000	9440700	8052200	0.513212	-1.09357	Elovl5	sp|Q8BHI7|ELOV5_MOUSE Elongation of very long chain fatty acids protein 5 OS=Mus musculus OX=10090 GN=Elovl5 PE=1 SV=1
54958000	64037000	66405000	47429000	65081000	69027000	83527000	0.187127	-0.100662	Elp2	sp|Q91WG4|ELP2_MOUSE Elongator complex protein 2 OS=Mus musculus OX=10090 GN=Elp2 PE=1 SV=1
72738000	68531000	90688000	51108000	75532000	93869000	85247000	0.0241906	0.0165141	Elp3	sp|Q9CZX0|ELP3_MOUSE Elongator complex protein 3 OS=Mus musculus OX=10090 GN=Elp3 PE=1 SV=1
15169000	28868000	30041000	18570000	17461000	21122000	3449300	0.738336	0.70471	Elp4	sp|Q9ER73|ELP4_MOUSE Elongator complex protein 4 OS=Mus musculus OX=10090 GN=Elp4 PE=1 SV=2
2284200	174660	8023200	3941300	174660	5692600	3731800	0.0152724	0.0456937	Elp5	sp|Q99L85|ELP5_MOUSE Elongator complex protein 5 OS=Mus musculus OX=10090 GN=Elp5 PE=2 SV=1
2434900	4568300	3550600	5009500	174660	4101100	6577500	0.0958193	-0.172844	Elp6	sp|Q8BK75|ELP6_MOUSE Elongator complex protein 6 OS=Mus musculus OX=10090 GN=Elp6 PE=2 SV=1
22674000	33634000	14796000	27712000	28947000	26622000	39345000	0.553249	-0.371225	Emb	sp|P21995|EMB_MOUSE Embigin OS=Mus musculus OX=10090 GN=Emb PE=1 SV=2
42730000	51276000	54140000	37362000	38483000	41891000	43948000	1.34144	0.28888	Emc1	sp|Q8C7X2|EMC1_MOUSE ER membrane protein complex subunit 1 OS=Mus musculus OX=10090 GN=Emc1 PE=1 SV=1
17210000	15896000	9956800	18547000	16140000	16823000	19011000	0.77387	-0.296573	Emc10	sp|Q3TAS6|EMC10_MOUSE ER membrane protein complex subunit 10 OS=Mus musculus OX=10090 GN=Emc10 PE=2 SV=2
43650000	41763000	34410000	41674000	42662000	36130000	33117000	0.165157	0.0569238	Emc2	sp|Q9CRD2|EMC2_MOUSE ER membrane protein complex subunit 2 OS=Mus musculus OX=10090 GN=Emc2 PE=1 SV=1
15889000	17764000	17604000	12471000	13353000	15535000	12748000	1.85232	0.336971	Emc3	sp|Q99KI3|EMC3_MOUSE ER membrane protein complex subunit 3 OS=Mus musculus OX=10090 GN=Emc3 PE=1 SV=3
21711000	23908000	23434000	16926000	20573000	23481000	20336000	0.767466	0.179202	Emc4	sp|Q9CZX9|EMC4_MOUSE ER membrane protein complex subunit 4 OS=Mus musculus OX=10090 GN=Emc4 PE=1 SV=1
12107000	14775000	14144000	16013000	11104000	6622000	8581400	0.569066	0.370223	Emc6	sp|Q9CQW0|EMC6_MOUSE ER membrane protein complex subunit 6 OS=Mus musculus OX=10090 GN=Emc6 PE=1 SV=1
49513000	34784000	42636000	32565000	31814000	30550000	24660000	1.51883	0.50102	Emc7	sp|Q9EP72|EMC7_MOUSE ER membrane protein complex subunit 7 OS=Mus musculus OX=10090 GN=Emc7 PE=1 SV=1
40032000	43302000	42510000	31965000	30334000	32981000	31602000	3.71736	0.403187	Emc8	sp|O70378|EMC8_MOUSE ER membrane protein complex subunit 8 OS=Mus musculus OX=10090 GN=Emc8 PE=1 SV=1
28508000	26817000	23051000	23469000	23981000	25284000	19209000	0.725809	0.18471	Emd	sp|O08579|EMD_MOUSE Emerin OS=Mus musculus OX=10090 GN=Emd PE=1 SV=1
16012000	9696100	12007000	14416000	10133000	9771100	13210000	0.124523	0.0813383	Emg1	sp|O35130|NEP1_MOUSE Ribosomal RNA small subunit methyltransferase NEP1 OS=Mus musculus OX=10090 GN=Emg1 PE=1 SV=1
174660	17759000	17892000	15338000	11263000	16538000	2733300	0.0261217	0.0584075	Emilin1	sp|Q99K41|EMIL1_MOUSE EMILIN-1 OS=Mus musculus OX=10090 GN=Emilin1 PE=1 SV=1
18152000	41149000	174660	12066000	22345000	174660	174660	0.411848	1.1899	Eml1	sp|Q05BC3|EMAL1_MOUSE Echinoderm microtubule-associated protein-like 1 OS=Mus musculus OX=10090 GN=Eml1 PE=1 SV=1
16278000	11357000	24757000	21739000	12716000	18651000	11594000	0.108617	0.110618	Eml2	sp|Q7TNG5|EMAL2_MOUSE Echinoderm microtubule-associated protein-like 2 OS=Mus musculus OX=10090 GN=Eml2 PE=1 SV=1
3263700	3881300	3367300	174660	4194500	3029800	2132500	0.494459	0.556347	Eml3	sp|Q8VC03|EMAL3_MOUSE Echinoderm microtubule-associated protein-like 3 OS=Mus musculus OX=10090 GN=Eml3 PE=1 SV=1
22367000	26818000	27989000	27315000	24902000	30509000	22833000	0.099843	-0.0368253	Eml4	sp|Q3UMY5|EMAL4_MOUSE Echinoderm microtubule-associated protein-like 4 OS=Mus musculus OX=10090 GN=Eml4 PE=1 SV=1
7543500	6542600	5393100	4108000	2628500	3607400	1766800	2.11246	1.10069	Emsy	sp|Q8BMB0|EMSY_MOUSE BRCA2-interacting transcriptional repressor EMSY OS=Mus musculus OX=10090 GN=Emsy PE=1 SV=2
42840000	46704000	54946000	36406000	38898000	41003000	37182000	1.54102	0.327872	Enah	sp|Q03173|ENAH_MOUSE Protein enabled homolog OS=Mus musculus OX=10090 GN=Enah PE=1 SV=2
174660	174660	10973000	174660	9651500	9766800	17507000	0.474171	-1.29721	Endod1	sp|Q8C522|ENDD1_MOUSE Endonuclease domain-containing 1 protein OS=Mus musculus OX=10090 GN=Endod1 PE=1 SV=2
174660	4595700	174660	174660	3505800	174660	5297200	0.121581	-0.473124	Eng	sp|Q63961|EGLN_MOUSE Endoglin OS=Mus musculus OX=10090 GN=Eng PE=1 SV=2
174660	3358800	6969500	5373500	174660	6742400	4069300	0.09062	-0.224327	Engase	sp|Q8BX80|ENASE_MOUSE Cytosolic endo-beta-N-acetylglucosaminidase OS=Mus musculus OX=10090 GN=Engase PE=1 SV=1
2756500	2170100	174660	3485000	5401800	5651500	5996000	1.84424	-1.59407	Enkd1	sp|Q7TSV9|ENKD1_MOUSE Enkurin domain-containing protein 1 OS=Mus musculus OX=10090 GN=Enkd1 PE=1 SV=1
977620000	1196500000	1137300000	948160000	972110000	800210000	707780000	1.358	0.365011	Eno1	sp|P17182|ENOA_MOUSE Alpha-enolase OS=Mus musculus OX=10090 GN=Eno1 PE=1 SV=3
7554800	14119000	9231000	4624100	7875700	8409600	7771600	0.777828	0.522773	Eno3	sp|P21550|ENOB_MOUSE Beta-enolase OS=Mus musculus OX=10090 GN=Eno3 PE=1 SV=3
22050000	16328000	20952000	19565000	25477000	27063000	15859000	0.263592	-0.153114	Enoph1	sp|Q8BGB7|ENOPH_MOUSE Enolase-phosphatase E1 OS=Mus musculus OX=10090 GN=Enoph1 PE=1 SV=1
3147200	6530500	7534800	5923600	8236700	11653000	11578000	0.890091	-0.704208	Enpp4	sp|Q8BTJ4|ENPP4_MOUSE Bis(5-adenosyl)-triphosphatase enpp4 OS=Mus musculus OX=10090 GN=Enpp4 PE=1 SV=1
4597600	174660	4987900	6242200	15344000	11334000	13818000	1.58838	-1.84459	Enpp5	sp|Q9EQG7|ENPP5_MOUSE Ectonucleotide pyrophosphatase/phosphodiesterase family member 5 OS=Mus musculus OX=10090 GN=Enpp5 PE=1 SV=3
92943000	92419000	103510000	91183000	90429000	75547000	30484000	0.668595	0.421189	Ensa	sp|P60840|ENSA_MOUSE Alpha-endosulfine OS=Mus musculus OX=10090 GN=Ensa PE=1 SV=1
11754000	4958000	11333000	10299000	13786000	9834600	16078000	0.568312	-0.419078	Enthd1	tr|E9Q1Z2|E9Q1Z2_MOUSE ENTH domain-containing 1 OS=Mus musculus OX=10090 GN=Enthd1 PE=1 SV=1
4676200	4167900	4644700	6336400	4373300	6975200	6535800	1.12428	-0.429441	Entpd1	sp|P55772|ENTP1_MOUSE Ectonucleoside triphosphate diphosphohydrolase 1 OS=Mus musculus OX=10090 GN=Entpd1 PE=1 SV=1
87883000	133780000	96396000	123560000	53936000	76776000	76304000	0.501103	0.35935	Entpd2	sp|O55026|ENTP2_MOUSE Ectonucleoside triphosphate diphosphohydrolase 2 OS=Mus musculus OX=10090 GN=Entpd2 PE=1 SV=2
174660	174660	2089900	174660	174660	174660	6025300	0.175141	-1.00988	Entpd4	sp|Q9DBT4|ENTP4_MOUSE Ectonucleoside triphosphate diphosphohydrolase 4 OS=Mus musculus OX=10090 GN=Entpd4 PE=1 SV=1
9120900	6470900	7777600	11864000	7600500	7365500	9585300	0.410068	-0.224887	Entpd5	sp|Q9WUZ9|ENTP5_MOUSE Ectonucleoside triphosphate diphosphohydrolase 5 OS=Mus musculus OX=10090 GN=Entpd5 PE=1 SV=1
18417000	8089300	14905000	15774000	13376000	20347000	15075000	0.316104	-0.225847	Entpd6	sp|Q3U0P5|ENTP6_MOUSE Ectonucleoside triphosphate diphosphohydrolase 6 OS=Mus musculus OX=10090 GN=Entpd6 PE=1 SV=1
85970000	57896000	56039000	62369000	73989000	80990000	44614000	0.0314643	0.0249945	Eny2	sp|Q9JIX0|ENY2_MOUSE Transcription and mRNA export factor ENY2 OS=Mus musculus OX=10090 GN=Eny2 PE=1 SV=1
2226300	3519200	174660	174660	3443600	174660	174660	0.325408	0.992414	Ep300	sp|B2RWS6|EP300_MOUSE Histone acetyltransferase p300 OS=Mus musculus OX=10090 GN=Ep300 PE=1 SV=2
16209000	12193000	11550000	15716000	12970000	10801000	11175000	0.135254	0.0724012	Ep400	sp|Q8CHI8|EP400_MOUSE E1A-binding protein p400 OS=Mus musculus OX=10090 GN=Ep400 PE=1 SV=3
26192000	29462000	27735000	25312000	18797000	21121000	31792000	0.451417	0.196583	Epb41	sp|P48193|EPB41_MOUSE Protein 4.1 OS=Mus musculus OX=10090 GN=Epb41 PE=1 SV=2
9118700	18316000	7951800	7757500	12582000	4091600	3358800	0.605502	0.763676	Epb41l1	sp|Q9Z2H5|E41L1_MOUSE Band 4.1-like protein 1 OS=Mus musculus OX=10090 GN=Epb41l1 PE=1 SV=2
188040000	237390000	213260000	191810000	166960000	187010000	164600000	1.23301	0.261562	Epb41l2	sp|O70318|E41L2_MOUSE Band 4.1-like protein 2 OS=Mus musculus OX=10090 GN=Epb41l2 PE=1 SV=2
108360000	124810000	101160000	89153000	91578000	85163000	65400000	1.58249	0.428198	Epb41l3	sp|Q9WV92|E41L3_MOUSE Band 4.1-like protein 3 OS=Mus musculus OX=10090 GN=Epb41l3 PE=1 SV=1
31712000	34089000	26643000	30708000	29336000	26028000	22268000	0.597065	0.186123	Epb41l5	sp|Q8BGS1|E41L5_MOUSE Band 4.1-like protein 5 OS=Mus musculus OX=10090 GN=Epb41l5 PE=1 SV=1
10485000	18688000	15553000	14490000	174660	10111000	10082000	0.717597	0.774676	Epcam	sp|Q99JW5|EPCAM_MOUSE Epithelial cell adhesion molecule OS=Mus musculus OX=10090 GN=Epcam PE=1 SV=1
174660	8230300	13291000	13175000	8143600	4473600	3928400	0.0163475	-0.0389993	Epg5	sp|Q80TA9|EPG5_MOUSE Ectopic P granules protein 5 homolog OS=Mus musculus OX=10090 GN=Epg5 PE=1 SV=2
54159000	62801000	46679000	65311000	67523000	82264000	80519000	1.5183	-0.438175	Ephx1	sp|Q9D379|HYEP_MOUSE Epoxide hydrolase 1 OS=Mus musculus OX=10090 GN=Ephx1 PE=1 SV=2
8181600	7887900	6706500	3957400	5976500	7500100	6673500	0.774283	0.33307	Ephx2	sp|P34914|HYES_MOUSE Bifunctional epoxide hydrolase 2 OS=Mus musculus OX=10090 GN=Ephx2 PE=1 SV=2
21222000	16653000	18850000	18468000	11486000	11494000	19490000	0.608993	0.31168	Epm2aip1	sp|Q8VEH5|EPMIP_MOUSE EPM2A-interacting protein 1 OS=Mus musculus OX=10090 GN=Epm2aip1 PE=1 SV=1
33779000	33302000	32259000	30691000	28151000	41571000	17737000	0.248222	0.164865	Epn1	sp|Q80VP1|EPN1_MOUSE Epsin-1 OS=Mus musculus OX=10090 GN=Epn1 PE=1 SV=3
20085000	12082000	14806000	12058000	13927000	13681000	9214000	0.692678	0.357625	Epn2	sp|Q8CHU3|EPN2_MOUSE Epsin-2 OS=Mus musculus OX=10090 GN=Epn2 PE=1 SV=1
138090000	124070000	126070000	129190000	159800000	132230000	137440000	0.515804	-0.110021	Eprs	sp|Q8CGC7|SYEP_MOUSE Bifunctional glutamate/proline--tRNA ligase OS=Mus musculus OX=10090 GN=Eprs1 PE=1 SV=4
108990000	100580000	95633000	105260000	102580000	109690000	126090000	0.603316	-0.124518	Eps15	sp|P42567|EPS15_MOUSE Epidermal growth factor receptor substrate 15 OS=Mus musculus OX=10090 GN=Eps15 PE=1 SV=1
76608000	75347000	71548000	65586000	67413000	74633000	56156000	0.896484	0.175953	Eps15l1	sp|Q60902|EP15R_MOUSE Epidermal growth factor receptor substrate 15-like 1 OS=Mus musculus OX=10090 GN=Eps15l1 PE=1 SV=3
9548600	14266000	12034000	14002000	16849000	13386000	14059000	0.877604	-0.286443	Eps8	sp|Q08509|EPS8_MOUSE Epidermal growth factor receptor kinase substrate 8 OS=Mus musculus OX=10090 GN=Eps8 PE=1 SV=2
4283000	174660	2967300	5817500	5969400	11137000	7472500	1.46021	-1.61841	Eps8l3	sp|Q91WL0|ES8L3_MOUSE Epidermal growth factor receptor kinase substrate 8-like protein 3 OS=Mus musculus OX=10090 GN=Eps8l3 PE=2 SV=1
174660	174660	174660	174660	174660	174660	174660	#DIV/0!	0	Ept1	sp|Q80TA1|EPT1_MOUSE Ethanolaminephosphotransferase 1 OS=Mus musculus OX=10090 GN=Selenoi PE=2 SV=3
3091100	2832700	2500200	2442900	2501700	2994700	174660	0.453873	0.469137	Eral1	sp|Q9CZU4|ERAL1_MOUSE GTPase Era, mitochondrial OS=Mus musculus OX=10090 GN=Eral1 PE=2 SV=1
17107000	20128000	13925000	13752000	11526000	11782000	17857000	0.685623	0.312801	Erap1	sp|Q9EQH2|ERAP1_MOUSE Endoplasmic reticulum aminopeptidase 1 OS=Mus musculus OX=10090 GN=Erap1 PE=1 SV=2
679080000	174660	703830000	223150000	188480000	8843400	1267500000	0.0343224	0.127635	Eras	sp|Q7TN89|RASE_MOUSE GTPase ERas OS=Mus musculus OX=10090 GN=Eras PE=1 SV=1
3573000	9638000	4622700	4626600	2462500	174660	993730	0.988384	1.52587	Erbb2ip	sp|Q80TH2|ERBIN_MOUSE Erbin OS=Mus musculus OX=10090 GN=Erbin PE=1 SV=3
17583000	16161000	22176000	19100000	16205000	13771000	13697000	0.643443	0.248258	Erc1	sp|Q99MI1|RB6I2_MOUSE ELKS/Rab6-interacting/CAST family member 1 OS=Mus musculus OX=10090 GN=Erc1 PE=1 SV=1
8969100	174660	23200000	9551000	21362000	19628000	32814000	0.581844	-0.950744	Ercc1	sp|P07903|ERCC1_MOUSE DNA excision repair protein ERCC-1 OS=Mus musculus OX=10090 GN=Ercc1 PE=2 SV=2
69628000	60149000	54921000	68695000	64250000	82345000	89655000	0.917793	-0.308343	Ercc2	sp|O08811|ERCC2_MOUSE General transcription and DNA repair factor IIH helicase subunit XPD OS=Mus musculus OX=10090 GN=Ercc2 PE=1 SV=2
32980000	22232000	22915000	23276000	32210000	34166000	35939000	0.553405	-0.269802	Ercc3	sp|P49135|ERCC3_MOUSE General transcription and DNA repair factor IIH helicase subunit XPB OS=Mus musculus OX=10090 GN=Ercc3 PE=2 SV=1
2973000	1448000	4716800	3738700	2665800	7930200	9904800	0.648946	-0.992404	Ercc4	sp|Q9QZD4|XPF_MOUSE DNA repair endonuclease XPF OS=Mus musculus OX=10090 GN=Ercc4 PE=1 SV=3
174660	174660	174660	174660	174660	174660	174660	#DIV/0!	0	Ercc6l	sp|Q8BHK9|ERC6L_MOUSE DNA excision repair protein ERCC-6-like OS=Mus musculus OX=10090 GN=Ercc6l PE=1 SV=1
41687000	44887000	47047000	28728000	39091000	37552000	29614000	1.60163	0.400385	Ergic1	sp|Q9DC16|ERGI1_MOUSE Endoplasmic reticulum-Golgi intermediate compartment protein 1 OS=Mus musculus OX=10090 GN=Ergic1 PE=1 SV=1
19216000	22879000	20079000	21870000	22846000	25568000	37906000	0.663402	-0.384146	Ergic2	sp|Q9CR89|ERGI2_MOUSE Endoplasmic reticulum-Golgi intermediate compartment protein 2 OS=Mus musculus OX=10090 GN=Ergic2 PE=1 SV=1
20448000	35288000	22541000	17653000	14598000	33866000	28388000	0.140192	0.143235	Ergic3	sp|Q9CQE7|ERGI3_MOUSE Endoplasmic reticulum-Golgi intermediate compartment protein 3 OS=Mus musculus OX=10090 GN=Ergic3 PE=1 SV=1
417420000	503360000	484230000	566760000	452590000	322540000	95530000	0.385952	0.382136	Erh	sp|P84089|ERH_MOUSE Enhancer of rudimentary homolog OS=Mus musculus OX=10090 GN=Erh PE=1 SV=1
58633000	70291000	67460000	67477000	61044000	86916000	89904000	0.557068	-0.221706	Erlec1	sp|Q8VEH8|ERLEC_MOUSE Endoplasmic reticulum lectin 1 OS=Mus musculus OX=10090 GN=Erlec1 PE=1 SV=1
58230000	40607000	45532000	51803000	52405000	57952000	44915000	0.275438	-0.105355	Erlin1	sp|Q91X78|ERLN1_MOUSE Erlin-1 OS=Mus musculus OX=10090 GN=Erlin1 PE=1 SV=2
115770000	116830000	131980000	127300000	157140000	153950000	176580000	1.27622	-0.339243	Erlin2	sp|Q8BFZ9|ERLN2_MOUSE Erlin-2 OS=Mus musculus OX=10090 GN=Erlin2 PE=1 SV=1
27442000	22402000	21318000	23857000	32121000	32345000	41056000	0.958479	-0.447387	Ermp1	sp|Q3UVK0|ERMP1_MOUSE Endoplasmic reticulum metallopeptidase 1 OS=Mus musculus OX=10090 GN=Ermp1 PE=1 SV=2
43057000	46513000	58728000	45676000	57562000	62858000	39712000	0.0986148	-0.0577624	Ero1l	sp|Q8R180|ERO1A_MOUSE ERO1-like protein alpha OS=Mus musculus OX=10090 GN=Ero1a PE=1 SV=2
42015000	30019000	40720000	34872000	45722000	59560000	60132000	0.763332	-0.413845	Ero1lb	sp|Q8R2E9|ERO1B_MOUSE ERO1-like protein beta OS=Mus musculus OX=10090 GN=Ero1b PE=1 SV=1
147750000	189220000	154620000	228700000	180600000	180960000	157580000	0.50158	-0.190237	Erp29	sp|P57759|ERP29_MOUSE Endoplasmic reticulum resident protein 29 OS=Mus musculus OX=10090 GN=Erp29 PE=1 SV=2
264070000	241860000	294900000	267090000	283700000	328490000	390360000	0.678838	-0.249814	Erp44	sp|Q9D1Q6|ERP44_MOUSE Endoplasmic reticulum resident protein 44 OS=Mus musculus OX=10090 GN=Erp44 PE=1 SV=1
4197300	3928400	4622000	4779200	2973300	174660	174660	0.796043	1.06896	Errfi1	sp|Q99JZ7|ERRFI_MOUSE ERBB receptor feedback inhibitor 1 OS=Mus musculus OX=10090 GN=Errfi1 PE=1 SV=1
171320000	181810000	191970000	113430000	201340000	170420000	155780000	0.422756	0.181302	Esd	sp|Q9R0P3|ESTD_MOUSE S-formylglutathione hydrolase OS=Mus musculus OX=10090 GN=Esd PE=1 SV=1
16087000	14757000	11981000	10638000	12070000	9992000	4990400	1.17159	0.599294	Esf1	sp|Q3V1V3|ESF1_MOUSE ESF1 homolog OS=Mus musculus OX=10090 GN=Esf1 PE=1 SV=1
14133000	5227300	10550000	10922000	12713000	16899000	21574000	0.750064	-0.639099	Espl1	sp|P60330|ESPL1_MOUSE Separin OS=Mus musculus OX=10090 GN=Espl1 PE=1 SV=1
55044000	90450000	64152000	98181000	73377000	81643000	88286000	0.673166	-0.288838	Espn	sp|Q9ET47|ESPN_MOUSE Espin OS=Mus musculus OX=10090 GN=Espn PE=1 SV=2
14003000	15248000	20731000	13252000	15045000	14356000	14966000	0.577012	0.209902	Esyt1	sp|Q3U7R1|ESYT1_MOUSE Extended synaptotagmin-1 OS=Mus musculus OX=10090 GN=Esyt1 PE=1 SV=2
13789000	20858000	19504000	14387000	11333000	14125000	13980000	1.15534	0.423749	Esyt2	sp|Q3TZZ7|ESYT2_MOUSE Extended synaptotagmin-2 OS=Mus musculus OX=10090 GN=Esyt2 PE=1 SV=1
2906200	3103600	3816500	2574800	3928300	1156900	2261500	0.500558	0.401128	Esyt3	sp|Q5DTI8|ESYT3_MOUSE Extended synaptotagmin-3 OS=Mus musculus OX=10090 GN=Esyt3 PE=2 SV=2
108220000	74646000	73722000	71936000	100490000	108030000	118270000	0.40658	-0.220906	Etf1	sp|Q8BWY3|ERF1_MOUSE Eukaryotic peptide chain release factor subunit 1 OS=Mus musculus OX=10090 GN=Etf1 PE=1 SV=4
173950000	176110000	152880000	164730000	172960000	159410000	162740000	0.142801	0.0233076	Etfa	sp|Q99LC5|ETFA_MOUSE Electron transfer flavoprotein subunit alpha, mitochondrial OS=Mus musculus OX=10090 GN=Etfa PE=1 SV=2
292670000	325610000	330180000	350530000	311960000	329390000	324010000	0.40512	-0.0573426	Etfb	sp|Q9DCW4|ETFB_MOUSE Electron transfer flavoprotein subunit beta OS=Mus musculus OX=10090 GN=Etfb PE=1 SV=3
126210000	148610000	135200000	119050000	125170000	138660000	101650000	0.694179	0.174146	Etfdh	sp|Q921G7|ETFD_MOUSE Electron transfer flavoprotein-ubiquinone oxidoreductase, mitochondrial OS=Mus musculus OX=10090 GN=Etfdh PE=1 SV=1
7946700	6652000	8365900	6129700	5672300	7580700	8766300	0.267568	0.121365	Ethe1	sp|Q9DCM0|ETHE1_MOUSE Persulfide dioxygenase ETHE1, mitochondrial OS=Mus musculus OX=10090 GN=Ethe1 PE=1 SV=2
174660	5251400	174660	4854300	4178600	6045900	10140000	1.04237	-1.75578	Etnk1	sp|Q9D4V0|EKI1_MOUSE Ethanolamine kinase 1 OS=Mus musculus OX=10090 GN=Etnk1 PE=1 SV=2
6896600	174660	4642400	5929900	3577500	4533500	4480100	0.157702	-0.245933	Etnk2	sp|A7MCT6|EKI2_MOUSE Ethanolamine kinase 2 OS=Mus musculus OX=10090 GN=Etnk2 PE=1 SV=1
5692300	10314000	174660	174660	9360200	174660	174660	0.336497	1.12614	Eva1b	sp|Q8K2Y3|EVA1B_MOUSE Protein eva-1 homolog B OS=Mus musculus OX=10090 GN=Eva1b PE=1 SV=1
4945500	7425300	9484400	3948500	6759900	4279400	7863200	0.439484	0.350757	Evi5	sp|P97366|EVI5_MOUSE Ecotropic viral integration site 5 protein OS=Mus musculus OX=10090 GN=Evi5 PE=1 SV=2
15379000	10045000	8094300	8399700	11667000	6702100	9009900	0.44851	0.320886	Evi5l	tr|H3BKQ3|H3BKQ3_MOUSE Ecotropic viral integration site 5-like OS=Mus musculus OX=10090 GN=Evi5l PE=1 SV=2
28684000	32626000	24931000	25711000	29544000	25060000	24736000	0.487946	0.130393	Evl	sp|P70429|EVL_MOUSE Ena/VASP-like protein OS=Mus musculus OX=10090 GN=Evl PE=1 SV=2
142360000	104780000	138230000	179090000	176210000	167050000	251630000	1.30752	-0.591015	Ewsr1	sp|Q61545|EWS_MOUSE RNA-binding protein EWS OS=Mus musculus OX=10090 GN=Ewsr1 PE=1 SV=2
4740000	2543200	174660	174660	174660	4949200	174660	0.251686	0.86142	Exd1	sp|Q8CDF7|EXD1_MOUSE piRNA biogenesis protein EXD1 OS=Mus musculus OX=10090 GN=Exd1 PE=1 SV=1
34973000	21436000	23225000	30029000	29487000	27521000	36869000	0.456942	-0.222752	Exd2	sp|Q8VEG4|EXD2_MOUSE Exonuclease 3-5 domain-containing protein 2 OS=Mus musculus OX=10090 GN=Exd2 PE=1 SV=2
15964000	24877000	22349000	23305000	15576000	29310000	23240000	0.172272	-0.11795	Exoc1	sp|Q8R3S6|EXOC1_MOUSE Exocyst complex component 1 OS=Mus musculus OX=10090 GN=Exoc1 PE=1 SV=4
25983000	28182000	23215000	26329000	22620000	28110000	28042000	0.0895651	-0.0267063	Exoc2	sp|Q9D4H1|EXOC2_MOUSE Exocyst complex component 2 OS=Mus musculus OX=10090 GN=Exoc2 PE=1 SV=1
40518000	32973000	50909000	18879000	17708000	26895000	38423000	1.12523	0.702799	Exoc3	sp|Q6KAR6|EXOC3_MOUSE Exocyst complex component 3 OS=Mus musculus OX=10090 GN=Exoc3 PE=1 SV=2
22673000	25226000	30614000	19861000	23295000	24254000	31774000	0.145692	0.0778616	Exoc3l1	sp|Q8BI71|EX3L1_MOUSE Exocyst complex component 3-like protein OS=Mus musculus OX=10090 GN=Exoc3l1 PE=1 SV=1
36682000	33670000	29432000	33312000	36453000	33207000	32353000	0.100852	-0.0245105	Exoc4	sp|O35382|EXOC4_MOUSE Exocyst complex component 4 OS=Mus musculus OX=10090 GN=Exoc4 PE=1 SV=2
17270000	15786000	13618000	13402000	15222000	14548000	17114000	0.143206	0.0458336	Exoc5	sp|Q3TPX4|EXOC5_MOUSE Exocyst complex component 5 OS=Mus musculus OX=10090 GN=Exoc5 PE=1 SV=2
12431000	13017000	12478000	12345000	11265000	14298000	12388000	0.0303935	0.00778105	Exoc6	sp|Q8R313|EXOC6_MOUSE Exocyst complex component 6 OS=Mus musculus OX=10090 GN=Exoc6 PE=1 SV=2
7486800	2942000	4455600	3440100	5747000	14393000	8449500	0.446132	-0.690567	Exoc6b	sp|A6H5Z3|EXC6B_MOUSE Exocyst complex component 6B OS=Mus musculus OX=10090 GN=Exoc6b PE=1 SV=1
22440000	18020000	20495000	25014000	25064000	27632000	27443000	2.13689	-0.371636	Exoc7	sp|O35250|EXOC7_MOUSE Exocyst complex component 7 OS=Mus musculus OX=10090 GN=Exoc7 PE=1 SV=2
56939000	63961000	60993000	45698000	66548000	63136000	54453000	0.216705	0.077529	Exoc8	sp|Q6PGF7|EXOC8_MOUSE Exocyst complex component 8 OS=Mus musculus OX=10090 GN=Exoc8 PE=1 SV=1
20231000	23034000	17374000	19359000	20899000	11389000	15134000	0.557192	0.275846	Exosc1	sp|Q9DAA6|EXOS1_MOUSE Exosome complex component CSL4 OS=Mus musculus OX=10090 GN=Exosc1 PE=1 SV=1
15128000	11890000	17469000	15177000	13125000	15073000	20180000	0.183257	-0.0995843	Exosc10	sp|P56960|EXOSX_MOUSE Exosome component 10 OS=Mus musculus OX=10090 GN=Exosc10 PE=1 SV=2
13595000	12310000	8812600	10112000	12842000	12285000	14800000	0.225389	-0.112348	Exosc2	sp|Q8VBV3|EXOS2_MOUSE Exosome complex component RRP4 OS=Mus musculus OX=10090 GN=Exosc2 PE=1 SV=1
174660	6237200	10634000	174660	174660	174660	174660	1.08594	5.02377	Exosc3	sp|Q7TQK4|EXOS3_MOUSE Exosome complex component RRP40 OS=Mus musculus OX=10090 GN=Exosc3 PE=1 SV=3
19983000	16699000	21288000	15730000	20588000	20325000	17874000	0.148008	0.0527744	Exosc4	sp|Q921I9|EXOS4_MOUSE Exosome complex component RRP41 OS=Mus musculus OX=10090 GN=Exosc4 PE=1 SV=3
24819000	18184000	27178000	22527000	30273000	29285000	27264000	0.600756	-0.22475	Exosc5	sp|Q9CRA8|EXOS5_MOUSE Exosome complex component RRP46 OS=Mus musculus OX=10090 GN=Exosc5 PE=1 SV=1
24941000	24752000	23045000	22292000	16912000	23581000	23613000	0.632823	0.166749	Exosc6	sp|Q8BTW3|EXOS6_MOUSE Exosome complex component MTR3 OS=Mus musculus OX=10090 GN=Exosc6 PE=1 SV=1
57710000	56417000	39053000	40436000	25716000	32384000	33949000	1.47415	0.624436	Exosc7	sp|Q9D0M0|EXOS7_MOUSE Exosome complex exonuclease RRP42 OS=Mus musculus OX=10090 GN=Exosc7 PE=1 SV=2
13205000	7948900	13196000	6997200	10679000	13173000	9865900	0.242991	0.169779	Exosc8	sp|Q9D753|EXOS8_MOUSE Exosome complex component RRP43 OS=Mus musculus OX=10090 GN=Exosc8 PE=1 SV=1
26839000	21404000	14628000	28438000	20635000	22762000	19841000	0.205881	-0.129112	Exosc9	sp|Q9JHI7|EXOS9_MOUSE Exosome complex component RRP45 OS=Mus musculus OX=10090 GN=Exosc9 PE=1 SV=1
6343000	174660	6613900	174660	174660	3741500	1121400	0.723644	1.74811	Extl2	sp|Q9ES89|EXTL2_MOUSE Exostosin-like 2 OS=Mus musculus OX=10090 GN=Extl2 PE=1 SV=1
4271200	3910100	174660	174660	4407100	5430700	7228400	0.303746	-0.629917	Eya3	sp|P97480|EYA3_MOUSE Eyes absent homolog 3 OS=Mus musculus OX=10090 GN=Eya3 PE=1 SV=2
82501000	84259000	64520000	57183000	55487000	67042000	77607000	0.763295	0.26112	Ezr	sp|P26040|EZRI_MOUSE Ezrin OS=Mus musculus OX=10090 GN=Ezr PE=1 SV=3
5945700	17425000	174660	3921100	5972200	174660	3256500	0.445022	1.2364	F10	sp|O88947|FA10_MOUSE Coagulation factor X OS=Mus musculus OX=10090 GN=F10 PE=1 SV=1
11631000	28903000	23924000	9705100	15815000	16472000	24950000	0.355967	0.360483	F11r	sp|O88792|JAM1_MOUSE Junctional adhesion molecule A OS=Mus musculus OX=10090 GN=F11r PE=1 SV=2
31873000	51129000	28823000	39126000	46095000	38263000	30255000	0.0581405	-0.0442029	F13a1	sp|Q8BH61|F13A_MOUSE Coagulation factor XIII A chain OS=Mus musculus OX=10090 GN=F13a1 PE=1 SV=3
28677000	29124000	23628000	35122000	16282000	14681000	12138000	0.539567	0.472987	F2	sp|P19221|THRB_MOUSE Prothrombin OS=Mus musculus OX=10090 GN=F2 PE=1 SV=1
6669100	174660	174660	5511500	174660	174660	174660	0.12864	0.632715	F8a1	sp|Q00558|HAP40_MOUSE 40-kDa huntingtin-associated protein OS=Mus musculus OX=10090 GN=F8a1 PE=1 SV=1
3255700	174660	1961000	174660	174660	174660	5217000	0.0773537	0.32439	Faah	sp|O08914|FAAH1_MOUSE Fatty-acid amide hydrolase 1 OS=Mus musculus OX=10090 GN=Faah PE=1 SV=1
16098000	34716000	22001000	24887000	19811000	32950000	25613000	0.100238	-0.0889504	Fabp3	sp|P11404|FABPH_MOUSE Fatty acid-binding protein, heart OS=Mus musculus OX=10090 GN=Fabp3 PE=1 SV=5
426730000	500700000	298280000	168450000	203350000	202730000	207600000	2.07428	1.06317	Fabp4	sp|P04117|FABP4_MOUSE Fatty acid-binding protein, adipocyte OS=Mus musculus OX=10090 GN=Fabp4 PE=1 SV=3
49988000	70869000	53443000	43098000	39913000	38374000	52960000	1.09189	0.414665	Fabp5	sp|Q05816|FABP5_MOUSE Fatty acid-binding protein 5 OS=Mus musculus OX=10090 GN=Fabp5 PE=1 SV=3
389660000	135550000	228330000	491290000	493590000	584900000	675280000	1.91317	-1.15996	Fabp9	sp|O08716|FABP9_MOUSE Fatty acid-binding protein 9 OS=Mus musculus OX=10090 GN=Fabp9 PE=1 SV=2
6904900	3904800	7331900	5695700	174660	8187300	7968800	0.0811577	0.135102	Fadd	sp|Q61160|FADD_MOUSE FAS-associated death domain protein OS=Mus musculus OX=10090 GN=Fadd PE=1 SV=1
23588000	21493000	20040000	28135000	26916000	28281000	34160000	1.82623	-0.43633	Fads1	sp|Q920L1|FADS1_MOUSE Acyl-CoA (8-3)-desaturase OS=Mus musculus OX=10090 GN=Fads1 PE=1 SV=1
47326000	70264000	72891000	77907000	87824000	110840000	97301000	1.41757	-0.55786	Fads2	sp|Q9Z0R9|FADS2_MOUSE Acyl-CoA 6-desaturase OS=Mus musculus OX=10090 GN=Fads2 PE=1 SV=1
35649000	29272000	30116000	25230000	29651000	34246000	30105000	0.278749	0.0878272	Faf1	sp|P54731|FAF1_MOUSE FAS-associated factor 1 OS=Mus musculus OX=10090 GN=Faf1 PE=1 SV=2
94360000	98013000	96968000	80531000	88654000	94721000	103400000	0.33644	0.0708258	Faf2	sp|Q3TDN2|FAF2_MOUSE FAS-associated factor 2 OS=Mus musculus OX=10090 GN=Faf2 PE=1 SV=2
40151000	63023000	36220000	39814000	32881000	38700000	30808000	0.69205	0.386254	Fah	sp|P35505|FAAA_MOUSE Fumarylacetoacetase OS=Mus musculus OX=10090 GN=Fah PE=1 SV=2
7786800	5467000	6065500	174660	4480100	2043200	5988600	0.99369	1.02178	Fahd1	sp|Q8R0F8|FAHD1_MOUSE Acylpyruvase FAHD1, mitochondrial OS=Mus musculus OX=10090 GN=Fahd1 PE=1 SV=2
54907000	40617000	49978000	73226000	86263000	75537000	80277000	2.7981	-0.700662	Fahd2	sp|Q3TC72|FAHD2_MOUSE Fumarylacetoacetate hydrolase domain-containing protein 2A OS=Mus musculus OX=10090 GN=Fahd2 PE=1 SV=1
41132000	30387000	58115000	32386000	46339000	44622000	31715000	0.214699	0.156636	Faim	sp|Q9WUD8|FAIM1_MOUSE Fas apoptotic inhibitory molecule 1 OS=Mus musculus OX=10090 GN=Faim PE=1 SV=1
14681000	10991000	13856000	16017000	14534000	11078000	12273000	0.0655445	-0.0324263	Fam102a	sp|Q78T81|F102A_MOUSE Protein FAM102A OS=Mus musculus OX=10090 GN=Fam102a PE=1 SV=1
22332000	14689000	21973000	18905000	16721000	19563000	25067000	0.0467823	-0.0290035	Fam103a1;Gm10767	sp|Q9CQY2|RAMAC_MOUSE RNA guanine-N7 methyltransferase activating subunit OS=Mus musculus OX=10090 GN=Ramac PE=3 SV=1;tr|Q3TQP0|Q3TQP0_MOUSE Predicted gene 10767 OS=Mus musculus OX=10090 GN=Gm10767 PE=2 SV=1
7530700	6874100	10482000	11107000	7618300	9408800	3141100	0.0761442	0.0853991	Fam104a	tr|A2A6P4|A2A6P4_MOUSE Family with sequence similarity 104, member A OS=Mus musculus OX=10090 GN=Fam104a PE=1 SV=1
100430000	38006000	66214000	122590000	112430000	109300000	66942000	0.79652	-0.591862	Fam107b	sp|Q3TGF2|F107B_MOUSE Protein FAM107B OS=Mus musculus OX=10090 GN=Fam107b PE=1 SV=2
40312000	54269000	41441000	33718000	30685000	21157000	16465000	1.65425	0.829955	Fam114a1	sp|Q9D281|NXP20_MOUSE Protein Noxp20 OS=Mus musculus OX=10090 GN=Fam114a1 PE=1 SV=1
83696000	66037000	77485000	76019000	87805000	91454000	80903000	0.654076	-0.150124	Fam114a2	sp|Q8VE88|F1142_MOUSE Protein FAM114A2 OS=Mus musculus OX=10090 GN=Fam114a2 PE=1 SV=2
7284900	174660	6040000	16630000	4899000	3299800	174660	0.142058	-0.474178	Fam117b	sp|Q3U3E2|F117B_MOUSE Protein FAM117B OS=Mus musculus OX=10090 GN=Fam117b PE=1 SV=1
35939000	11684000	31626000	43319000	33191000	35546000	26784000	0.500569	-0.393921	Fam118a	sp|Q91YN1|F118A_MOUSE Protein FAM118A OS=Mus musculus OX=10090 GN=Fam118a PE=1 SV=1
28467000	16318000	23146000	31081000	40648000	41021000	52695000	1.57972	-0.869172	Fam118b	sp|Q8C569|F118B_MOUSE Protein FAM118B OS=Mus musculus OX=10090 GN=Fam118b PE=1 SV=1
25591000	28225000	29500000	23877000	25368000	27103000	24882000	0.975487	0.134066	FAM120A	sp|Q6A0A9|F120A_MOUSE Constitutive coactivator of PPAR-gamma-like protein 1 OS=Mus musculus OX=10090 GN=FAM120A PE=1 SV=2
2839800	174660	174660	3725800	1376100	4600700	5701900	1.05643	-1.85708	Fam120c	sp|Q8C3F2|F120C_MOUSE Constitutive coactivator of PPAR-gamma-like protein 2 OS=Mus musculus OX=10090 GN=Fam120c PE=1 SV=3
8144400	10205000	10265000	10456000	10292000	10423000	8866100	0.25846	-0.0695586	Fam126a	sp|Q6P9N1|HYCCI_MOUSE Hyccin OS=Mus musculus OX=10090 GN=Fam126a PE=1 SV=3
24810000	30529000	28064000	25873000	32671000	32769000	33516000	0.627362	-0.166744	Fam129a	sp|Q3UW53|NIBA1_MOUSE Protein Niban 1 OS=Mus musculus OX=10090 GN=Niban1 PE=1 SV=2
11293000	7085500	8884800	12038000	8854600	6288600	6567300	0.129102	0.107174	Fam133b	sp|Q9CVI2|F133B_MOUSE Protein FAM133B OS=Mus musculus OX=10090 GN=Fam133b PE=1 SV=3
12207000	3573000	11232000	12969000	11055000	23860000	30063000	0.882713	-1.11386	Fam134a	sp|Q6NS82|RETR2_MOUSE Reticulophagy regulator 2 OS=Mus musculus OX=10090 GN=Retreg2 PE=1 SV=2
10195000	14731000	12461000	10383000	13111000	11038000	18076000	0.108212	-0.077708	Fam134c	sp|Q9CQV4|RETR3_MOUSE Reticulophagy regulator 3 OS=Mus musculus OX=10090 GN=Retreg3 PE=1 SV=1
6317900	174660	2729300	9316800	7057400	11749000	12037000	1.72918	-1.7076	Fam135a	sp|Q6NS59|F135A_MOUSE Protein FAM135A OS=Mus musculus OX=10090 GN=Fam135a PE=1 SV=2
68467000	105720000	96138000	87289000	63904000	57977000	46076000	0.93403	0.497844	Fam136a	sp|Q9CR98|F136A_MOUSE Protein FAM136A OS=Mus musculus OX=10090 GN=Fam136a PE=1 SV=1
3426900	2585900	2103200	174660	2546700	1558500	3918100	0.270198	0.400541	Fam160a2	sp|Q3U2I3|F16A2_MOUSE FTS and Hook-interacting protein OS=Mus musculus OX=10090 GN=Fam160a2 PE=1 SV=2
16068000	9585400	12110000	9278000	9045000	18416000	34819000	0.299338	-0.507087	Fam160b1	sp|Q8CDM8|F16B1_MOUSE Protein FAM160B1 OS=Mus musculus OX=10090 GN=Fam160b1 PE=1 SV=2
47529000	36586000	47890000	36344000	46414000	47672000	80041000	0.307484	-0.257991	Fam162a	sp|Q9D6U8|F162A_MOUSE Protein FAM162A OS=Mus musculus OX=10090 GN=Fam162a PE=1 SV=1
174660	174660	174660	174660	174660	174660	174660	#DIV/0!	0	Fam168a	sp|Q8BGZ2|F168A_MOUSE Protein FAM168A OS=Mus musculus OX=10090 GN=Fam168a PE=1 SV=1
62145000	61863000	65340000	60119000	66428000	49039000	34078000	0.583706	0.267999	Fam169a	sp|Q5XG69|F169A_MOUSE Soluble lamin-associated protein of 75 kDa OS=Mus musculus OX=10090 GN=Fam169a PE=1 SV=3
4135300	4459500	5962200	8652200	7384500	10863000	5065100	1.03607	-0.719734	Fam170a	sp|Q66LM6|F170A_MOUSE Protein FAM170A OS=Mus musculus OX=10090 GN=Fam170a PE=1 SV=1
10303000	9284100	5829500	8846000	12770000	9818300	22502000	0.60048	-0.670448	Fam172a	sp|Q3TNH5|F172A_MOUSE Cotranscriptional regulator FAM172A OS=Mus musculus OX=10090 GN=Fam172a PE=1 SV=2
5760700	5347400	5590000	8076100	10132000	7311500	8131900	1.96555	-0.595949	Fam173a	sp|Q501J2|ANKMT_MOUSE Adenine nucleotide translocase lysine N-methyltransferase OS=Mus musculus OX=10090 GN=Antkmt PE=1 SV=1
7921400	4586500	174660	174660	11864000	174660	174660	0.104922	0.448943	Fam175a	sp|Q8BPZ8|ABRX1_MOUSE BRCA1-A complex subunit Abraxas 1 OS=Mus musculus OX=10090 GN=Abraxas1 PE=1 SV=1
17443000	11199000	11479000	14212000	15373000	9877400	10829000	0.129081	0.0890833	Fam175b	sp|Q3TCJ1|ABRX2_MOUSE BRISC complex subunit Abraxas 2 OS=Mus musculus OX=10090 GN=Abraxas2 PE=1 SV=1
4249200	2527900	2001400	6428600	10961000	7612700	29756000	0.804942	-2.22599	Fam177a1	sp|Q8BR63|F177A_MOUSE Protein FAM177A1 OS=Mus musculus OX=10090 GN=Fam177a1 PE=1 SV=1
174660	174660	174660	174660	174660	14540000	24889000	0.640639	-5.83129	Fam186b	tr|D3Z420|D3Z420_MOUSE Family with sequence similarity 186, member B OS=Mus musculus OX=10090 GN=Fam186b PE=4 SV=1
7772900	174660	174660	174660	10885000	2689100	10894000	0.379177	-1.18618	Fam188a	sp|Q9CV28|MINY3_MOUSE Ubiquitin carboxyl-terminal hydrolase MINDY-3 OS=Mus musculus OX=10090 GN=MINDY3 PE=1 SV=2
7762700	174660	6665700	20719000	17254000	14389000	16916000	2.373	-1.83109	Fam188b	sp|Q3UQI9|MINY4_MOUSE Probable ubiquitin carboxyl-terminal hydrolase MINDY-4 OS=Mus musculus OX=10090 GN=Mindy4 PE=1 SV=1
42821000	45023000	45592000	54769000	37881000	37768000	33189000	0.25534	0.120951	Fam192a	sp|Q91WE2|PIP30_MOUSE PSME3-interacting protein OS=Mus musculus OX=10090 GN=Psme3ip1 PE=1 SV=1
9103900	11411000	9141100	4964900	5048300	174660	174660	2.03833	1.93199	Fam193a	sp|Q8CGI1|F193A_MOUSE Protein FAM193A OS=Mus musculus OX=10090 GN=Fam193a PE=1 SV=2
1826200	174660	3964800	174660	174660	174660	2998900	0.384072	1.17496	Fam195a	sp|Q9CQB2|MCRI2_MOUSE MAPK regulated corepressor interacting protein 2 OS=Mus musculus OX=10090 GN=Mcrip2 PE=1 SV=1
59992000	69960000	60311000	67757000	66053000	53949000	64656000	0.0233748	0.00723488	Fam195b	sp|Q3UGS4|MCRI1_MOUSE Mapk-regulated corepressor-interacting protein 1 OS=Mus musculus OX=10090 GN=Mcrip1 PE=1 SV=1
6411900	3625200	3370700	5341500	5538200	6793800	9508300	0.804205	-0.604531	Fam206a	sp|Q80ZQ9|ABITM_MOUSE Protein Abitram OS=Mus musculus OX=10090 GN=Abitram PE=1 SV=2
5296400	5995800	5849300	4012700	6465400	174660	4351400	0.578604	0.607168	Fam207a	sp|P58468|F207A_MOUSE Protein FAM207A OS=Mus musculus OX=10090 GN=Fam207a PE=1 SV=1
23749000	13840000	14450000	17309000	21136000	18662000	16666000	0.14075	-0.0884622	Fam208a	sp|Q69ZR9|TASOR_MOUSE Protein TASOR OS=Mus musculus OX=10090 GN=Tasor PE=1 SV=2
29644000	20450000	27023000	23547000	10305000	16901000	17964000	1.08082	0.581419	Fam208b	sp|Q5DTT3|TASO2_MOUSE Protein TASOR 2 OS=Mus musculus OX=10090 GN=Tasor2 PE=1 SV=2
174660	2574200	1654300	174660	174660	2387200	8025100	0.21244	-0.874247	Fam209	tr|A2APA5|A2APA5_MOUSE 1700029J11Rik protein OS=Mus musculus OX=10090 GN=Fam209 PE=2 SV=1
16306000	174660	10217000	7183800	16475000	11258000	17209000	0.365837	-0.550247	Fam20b	sp|Q8VCS3|XYLK_MOUSE Glycosaminoglycan xylosylkinase OS=Mus musculus OX=10090 GN=Fam20b PE=1 SV=1
19669000	28344000	20682000	21538000	18344000	11017000	14264000	0.911381	0.49119	Fam21	sp|Q6PGL7|WASC2_MOUSE WASH complex subunit 2 OS=Mus musculus OX=10090 GN=Washc2 PE=1 SV=1
3923700	6087600	6957000	2712200	4992100	6641200	4949100	0.280484	0.229682	Fam210a	sp|Q8BGY7|F210A_MOUSE Protein FAM210A OS=Mus musculus OX=10090 GN=Fam210a PE=1 SV=1
176620000	189530000	216480000	168950000	197940000	196640000	150840000	0.406021	0.120946	Fam213a	sp|Q9CYH2|PXL2A_MOUSE Peroxiredoxin-like 2A OS=Mus musculus OX=10090 GN=Prxl2a PE=1 SV=2
[truncated: 4,776 more rows]

## Sheet: mTECs ALI 4 Total
LFQ intensity SrsfHom-ALI 4	LFQ intensity SrsfHom-ALI4 -2	LFQ intensity SrsfHom-ALI4-3	LFQ intensity W-ALI4-1	LFQ intensity W-ALI4-2	LFQ intensity WT ALI4-3	Log10 p ALI4	Log2 FC ALI 4	Gene names	Fasta headers
352980000	330450000	328090000	339630000	386640000	444900000	0.77984	-0.211426	2002-03-01	sp|Q922Q1|MARC2_MOUSE Mitochondrial amidoxime reducing component 2 OS=Mus musculus (Mouse) OX=10090 GN=Marc2 PE=1 SV=1
1411900000	1347200000	1636100000	1515600000	1417800000	1280700000	0.210989	0.0607043	2002-09-01	sp|P42208|SEPT2_MOUSE Septin-2 OS=Mus musculus (Mouse) OX=10090 GN=Septin2 PE=1 SV=2
145940000	138280000	139620000	62423000	90124000	141340000	0.867304	0.528258	2005-03-01	sp|Q3KNM2|MARH5_MOUSE E3 ubiquitin-protein ligase MARCH5 OS=Mus musculus (Mouse) OX=10090 GN=March5 PE=1 SV=1
39144000	42132000	30276000	36652000	61939000	151410000	0.588934	-1.16422	2005-09-01	sp|Q9Z2Q6|SEPT5_MOUSE Septin-5 OS=Mus musculus (Mouse) OX=10090 GN=Septin5 PE=1 SV=2
63357	63357	22097000	63357	29382000	63357	0.0694406	-0.409041	2006-03-01	sp|Q6ZQ89|MARH6_MOUSE E3 ubiquitin-protein ligase MARCH6 OS=Mus musculus (Mouse) OX=10090 GN=March6 PE=2 SV=2
63357	63357	63357	63357	8667900	10820000	0.917187	-6.68458	2006-09-01	sp|Q9R1T4|SEPT6_MOUSE Septin-6 OS=Mus musculus (Mouse) OX=10090 GN=Septin6 PE=1 SV=4
1319100000	1276400000	1393100000	1170000000	1363400000	1008900000	0.619042	0.171196	2007-09-01	sp|O55131|SEPT7_MOUSE Septin-7 OS=Mus musculus (Mouse) OX=10090 GN=Septin7 PE=1 SV=1
161890000	207790000	187510000	202580000	258660000	346370000	0.886006	-0.535489	2008-09-01	sp|Q8CHH9|SEPT8_MOUSE Septin-8 OS=Mus musculus (Mouse) OX=10090 GN=Septin8 PE=1 SV=4
880370000	862920000	868080000	828850000	1008600000	1097300000	0.611156	-0.168431	2009-09-01	sp|Q80UG5|SEPT9_MOUSE Septin-9 OS=Mus musculus (Mouse) OX=10090 GN=Septin9 PE=1 SV=1
40942000	30503000	56829000	58546000	43478000	55316000	0.470498	-0.294657	2010-09-01	sp|Q8C650|SEP10_MOUSE Septin-10 OS=Mus musculus (Mouse) OX=10090 GN=Septin10 PE=1 SV=1
545780000	595520000	600120000	584670000	660780000	817280000	0.690153	-0.244291	2011-09-01	sp|Q8C1B7|SEP11_MOUSE Septin-11 OS=Mus musculus (Mouse) OX=10090 GN=Septin11 PE=1 SV=4
147080000	117270000	59475000	62357000	122860000	258450000	0.249517	-0.454263	2015-09-01	sp|Q9ERR7|SEP15_MOUSE Selenoprotein F OS=Mus musculus (Mouse) OX=10090 GN=Selenof PE=1 SV=3
63357	18841000	22718000	4112800	13108000	8452700	0.287734	0.697079	0610009B22Rik;Trappc2	tr|Q8R3W2|Q8R3W2_MOUSE MCG6979, isoform CRA_a OS=Mus musculus (Mouse) OX=10090 GN=0610009B22Rik PE=2 SV=1;sp|Q9CQP2|TPPC2_MOUSE Trafficking protein particle complex subunit 2 OS=Mus musculus (Mouse) OX=10090 GN=Trappc2 PE=1 SV=1
63357	63357	63357	63357	23807000	63357	0.427243	-6.97636	1700101E01Rik	tr|A0A087WRI3|A0A087WRI3_MOUSE Cilia and flagella-associated protein 77 OS=Mus musculus (Mouse) OX=10090 GN=Cfap77 PE=1 SV=1
63357	11527000	56122000	65179000	63357	63357	0.00955937	0.0522099	2010300C02Rik	tr|E9Q3M9|E9Q3M9_MOUSE DUF4592 domain-containing protein OS=Mus musculus (Mouse) OX=10090 GN=2010300C02Rik PE=1 SV=1
138800000	141910000	106510000	65083000	94140000	143240000	0.482305	0.356395	2200002D01Rik	tr|Q9D809|Q9D809_MOUSE MCG22941 OS=Mus musculus (Mouse) OX=10090 GN=2200002D01Rik PE=1 SV=1
256800000	314230000	305830000	302560000	279310000	505840000	0.401383	-0.310876	2210016F16Rik	tr|G3X8U3|G3X8U3_MOUSE Queuosine salvage protein OS=Mus musculus (Mouse) OX=10090 GN=2210016F16Rik PE=1 SV=1
63357	63357	13517000	63357	63357	26561000	0.165339	-0.967939	2210407C18Rik	tr|Q6YI28|Q6YI28_MOUSE UPAR/Ly6 domain-containing protein OS=Mus musculus (Mouse) OX=10090 GN=2210407C18Rik PE=1 SV=1
63357	4764600	8352900	16934000	13720000	5784900	0.882721	-1.46704	2310061I04Rik	tr|B8JJ69|B8JJ69_MOUSE RIKEN cDNA 2310061I04 gene OS=Mus musculus (Mouse) OX=10090 GN=2310061I04Rik PE=1 SV=1
3267400	10872000	12672000	63357	63357	5706200	0.950882	2.20056	2410002F23Rik	tr|Q3TE80|Q3TE80_MOUSE RIKEN cDNA 2410002F23 gene OS=Mus musculus (Mouse) OX=10090 GN=2410002F23Rik PE=1 SV=1
63357	63357	5911500	63357	63357	654090	0.375054	2.95109	2410004P03Rik	tr|A0A087WQY2|A0A087WQY2_MOUSE RIKEN cDNA 2410004P03 gene OS=Mus musculus (Mouse) OX=10090 GN=2410004P03Rik PE=4 SV=1
63357	63357	63357	63357	63357	12542000	0.427243	-6.05859	2610028H24Rik	tr|G5E8K1|G5E8K1_MOUSE DUF4587 domain-containing protein OS=Mus musculus (Mouse) OX=10090 GN=2610028H24Rik PE=4 SV=1
21920000	21586000	33300000	21127000	32271000	20512000	0.0617769	0.0554494	2700097O09Rik	tr|Q6PGK3|Q6PGK3_MOUSE RIKEN cDNA 2700097O09 OS=Mus musculus (Mouse) OX=10090 GN=2700097O09Rik PE=1 SV=1
34688000	43029000	38380000	51136000	33798000	47595000	0.398547	-0.190977	2810408M09Rik;Tp53rk	tr|Q5U452|Q5U452_MOUSE Protein kinase domain-containing protein OS=Mus musculus (Mouse) OX=10090 GN=Trp53rka PE=1 SV=1;sp|Q99PW4|PRPK_MOUSE EKC/KEOPS complex subunit Tp53rk OS=Mus musculus (Mouse) OX=10090 GN=Tp53rk PE=2 SV=1
110860000	16554000	31604000	58913000	48779000	40896000	0.0397709	0.0978725	4732456N10Rik	tr|E9Q1Z0|E9Q1Z0_MOUSE IF rod domain-containing protein OS=Mus musculus (Mouse) OX=10090 GN=Krt90 PE=1 SV=1
63357	4949700	63357	63357	63357	82882000	0.39715	-4.03138	4930572O03Rik;Gm17019	tr|A0A0G2JFY7|A0A0G2JFY7_MOUSE Takusan domain-containing protein OS=Mus musculus (Mouse) OX=10090 GN=Gm21149 PE=4 SV=1;tr|Q8C5Y0|Q8C5Y0_MOUSE Takusan domain-containing protein OS=Mus musculus (Mouse) OX=10090 GN=4930572O03Rik PE=2 SV=1;tr|K7N6W5|K7N6W5_MOU
63357	63357	88134000	63357	63357	249980000	0.240827	-1.5027	4931408C20Rik	tr|E9PWP9|E9PWP9_MOUSE FAM75 domain-containing protein OS=Mus musculus (Mouse) OX=10090 GN=4931408C20Rik PE=4 SV=1
63357	63357	63357	63357	63357	63357	#DIV/0!	0	9530053A07Rik	tr|E9PVG8|E9PVG8_MOUSE RIKEN cDNA 9530053A07 gene OS=Mus musculus (Mouse) OX=10090 GN=9530053A07Rik PE=1 SV=1
22654000	21590000	23818000	22479000	24595000	13534000	0.291338	0.167341	A0A0J9YTR2	tr|A0A0J9YTR2|A0A0J9YTR2_MOUSE RIKEN cDNA 0610012G03 gene OS=Mus musculus (Mouse) OX=10090 GN=0610012G03Rik PE=1 SV=1
63357	63357	63357	63357	63357	63357	#DIV/0!	0	A0A1B0GSF9	tr|A0A1B0GSF9|A0A1B0GSF9_MOUSE Predicted gene, 19935 OS=Mus musculus (Mouse) OX=10090 GN=Gm19935 PE=4 SV=1
49318000	34591000	63357	45909000	35205000	60697000	0.517195	-0.755983	A0A1B0GT42	tr|A0A1B0GT42|A0A1B0GT42_MOUSE Predicted gene, 32742 OS=Mus musculus (Mouse) OX=10090 GN=Gm32742 PE=4 SV=1
179940000	166480000	160580000	171020000	156000000	161600000	0.353097	0.0532728	Aaas	sp|P58742|AAAS_MOUSE Aladin OS=Mus musculus (Mouse) OX=10090 GN=Aaas PE=1 SV=1
897480000	1025900000	775400000	844500000	1074100000	1108400000	0.42469	-0.165581	Aacs	sp|Q9D2R0|AACS_MOUSE Acetoacetyl-CoA synthetase OS=Mus musculus (Mouse) OX=10090 GN=Aacs PE=1 SV=1
19517000	8697800	15501000	11406000	19492000	63357	0.262521	0.497686	Aagab	sp|Q8R2R3|AAGAB_MOUSE Alpha- and gamma-adaptin-binding protein p34 OS=Mus musculus (Mouse) OX=10090 GN=Aagab PE=1 SV=2
96426000	79724000	80612000	64785000	98690000	85202000	0.0848901	0.0461586	Aak1	sp|Q3UHJ0|AAK1_MOUSE AP2-associated protein kinase 1 OS=Mus musculus (Mouse) OX=10090 GN=Aak1 PE=1 SV=2
63357	63357	63357	63357	63357	63357	#DIV/0!	0	Aamdc	sp|Q8R0P4|AAMDC_MOUSE Mth938 domain-containing protein OS=Mus musculus (Mouse) OX=10090 GN=Aamdc PE=1 SV=1
31257000	19552000	54323000	29631000	39216000	33121000	0.0336367	0.0440854	Aamp	tr|J3QN89|J3QN89_MOUSE WD_REPEATS_REGION domain-containing protein OS=Mus musculus (Mouse) OX=10090 GN=Aamp PE=1 SV=1
63357	63357	63357	63357	63357	63357	#DIV/0!	0	Aar2	sp|Q9D2V5|AAR2_MOUSE Protein AAR2 homolog OS=Mus musculus (Mouse) OX=10090 GN=Aar2 PE=1 SV=3
1211200000	1450100000	1369700000	1250800000	1541700000	1720000000	0.449378	-0.162789	Aars	sp|Q8BGQ7|SYAC_MOUSE Alanine--tRNA ligase, cytoplasmic OS=Mus musculus (Mouse) OX=10090 GN=Aars PE=1 SV=1
83648000	78380000	64595000	52920000	38429000	68044000	1.025	0.507706	Aars2	sp|Q14CH7|SYAM_MOUSE Alanine--tRNA ligase, mitochondrial OS=Mus musculus (Mouse) OX=10090 GN=Aars2 PE=1 SV=1
124080000	124370000	112000000	88269000	100480000	134680000	0.354601	0.15635	Aarsd1	sp|Q3THG9|AASD1_MOUSE Alanyl-tRNA editing protein Aarsd1 OS=Mus musculus (Mouse) OX=10090 GN=Aarsd1 PE=1 SV=2
63357	63357	14592000	22217000	10266000	3740700	0.420899	-1.29928	Aasdhppt	sp|Q9CQF6|ADPPT_MOUSE L-aminoadipate-semialdehyde dehydrogenase-phosphopantetheinyl transferase OS=Mus musculus (Mouse) OX=10090 GN=Aasdhppt PE=1 SV=1
24779000	21223000	29821000	18465000	24841000	9558900	0.684416	0.520325	Aatf	sp|Q9JKX4|AATF_MOUSE Protein AATF OS=Mus musculus (Mouse) OX=10090 GN=Aatf PE=1 SV=1
63357	36339000	72493000	32013000	82294000	51118000	0.299763	-0.603235	Abca13	sp|Q5SSE9|ABCAD_MOUSE ATP-binding cassette sub-family A member 13 OS=Mus musculus (Mouse) OX=10090 GN=Abca13 PE=2 SV=1
41872000	43789000	44032000	40748000	44376000	67973000	0.383249	-0.239345	Abca3	sp|Q8R420|ABCA3_MOUSE ATP-binding cassette sub-family A member 3 OS=Mus musculus (Mouse) OX=10090 GN=Abca3 PE=1 SV=3
130920000	132660000	99694000	150690000	176250000	167150000	1.53922	-0.443716	Abcb10	sp|Q9JI39|ABCBA_MOUSE ATP-binding cassette sub-family B member 10, mitochondrial OS=Mus musculus (Mouse) OX=10090 GN=Abcb10 PE=1 SV=1
36924000	43257000	39462000	34843000	34611000	39450000	0.670438	0.135679	Abcb1b	sp|P06795|MDR1B_MOUSE ATP-dependent translocase ABCB1 OS=Mus musculus (Mouse) OX=10090 GN=Abcb1b PE=1 SV=1
39845000	64837000	76628000	52710000	81575000	71588000	0.233784	-0.183296	Abcb6	sp|Q9DC29|ABCB6_MOUSE ATP-binding cassette sub-family B member 6, mitochondrial OS=Mus musculus (Mouse) OX=10090 GN=Abcb6 PE=1 SV=1
133720000	143420000	162630000	227470000	182490000	199900000	1.65535	-0.471729	Abcb7	sp|Q61102|ABCB7_MOUSE ATP-binding cassette sub-family B member 7, mitochondrial OS=Mus musculus (Mouse) OX=10090 GN=Abcb7 PE=1 SV=3
67969000	80549000	55408000	89220000	134830000	92844000	1.08359	-0.635955	Abcb8	sp|Q9CXJ4|ABCB8_MOUSE ATP-binding cassette sub-family B member 8, mitochondrial OS=Mus musculus (Mouse) OX=10090 GN=Abcb8 PE=1 SV=1
427300000	448820000	476030000	504110000	570820000	546260000	1.69236	-0.261798	Abcc1	sp|O35379|MRP1_MOUSE Multidrug resistance-associated protein 1 OS=Mus musculus (Mouse) OX=10090 GN=Abcc1 PE=1 SV=1
32370000	42447000	47100000	15946000	63357	63357	2.17115	2.92321	Abcc10	sp|Q8R4P9|MRP7_MOUSE Multidrug resistance-associated protein 7 OS=Mus musculus (Mouse) OX=10090 GN=Abcc10 PE=1 SV=1
25806000	43893000	39522000	43345000	41246000	105030000	0.548448	-0.795868	Abcc3	sp|B2RX12|MRP3_MOUSE Canalicular multispecific organic anion transporter 2 OS=Mus musculus (Mouse) OX=10090 GN=Abcc3 PE=1 SV=1
144520000	151560000	143130000	169370000	153100000	248360000	0.674492	-0.37815	Abcc4	tr|E9Q236|E9Q236_MOUSE ATP-binding cassette, sub-family C (CFTR/MRP), member 4 OS=Mus musculus (Mouse) OX=10090 GN=Abcc4 PE=1 SV=1
645120000	814820000	736040000	974020000	710120000	923580000	0.656829	-0.247924	Abcd3	sp|P55096|ABCD3_MOUSE ATP-binding cassette sub-family D member 3 OS=Mus musculus (Mouse) OX=10090 GN=Abcd3 PE=1 SV=2
15929000	17594000	20489000	57000000	19664000	10529000	0.317168	-0.690932	Abcd4	sp|O89016|ABCD4_MOUSE ATP-binding cassette sub-family D member 4 OS=Mus musculus (Mouse) OX=10090 GN=Abcd4 PE=1 SV=2
793390000	737890000	801600000	664690000	796590000	974080000	0.137391	-0.062023	Abce1	sp|P61222|ABCE1_MOUSE ATP-binding cassette sub-family E member 1 OS=Mus musculus (Mouse) OX=10090 GN=Abce1 PE=1 SV=1
250440000	278750000	278090000	251590000	289640000	357980000	0.398994	-0.155589	Abcf1	sp|Q6P542|ABCF1_MOUSE ATP-binding cassette sub-family F member 1 OS=Mus musculus (Mouse) OX=10090 GN=Abcf1 PE=1 SV=1
223580000	205760000	243490000	187830000	198590000	199740000	1.1772	0.198948	Abcf2	sp|Q99LE6|ABCF2_MOUSE ATP-binding cassette sub-family F member 2 OS=Mus musculus (Mouse) OX=10090 GN=Abcf2 PE=1 SV=1
139520000	106020000	125570000	103070000	108600000	125170000	0.412684	0.139783	Abcf3	sp|Q8K268|ABCF3_MOUSE ATP-binding cassette sub-family F member 3 OS=Mus musculus (Mouse) OX=10090 GN=Abcf3 PE=1 SV=1
63357	63357	63357	2619100	63357	63357	0.427243	-3.85262	Abcg3	sp|Q99P81|ABCG3_MOUSE ATP-binding cassette sub-family G member 3 OS=Mus musculus (Mouse) OX=10090 GN=Abcg3 PE=1 SV=2
5704600	7007400	63357	5243600	4479400	7165300	0.237029	-0.402661	Abhd10	sp|Q6PE15|ABHDA_MOUSE Mycophenolic acid acyl-glucuronide esterase, mitochondrial OS=Mus musculus (Mouse) OX=10090 GN=Abhd10 PE=1 SV=1
149590000	152660000	131400000	218980000	239170000	239640000	3.12151	-0.686262	Abhd11	sp|Q8K4F5|ABHDB_MOUSE Protein ABHD11 OS=Mus musculus (Mouse) OX=10090 GN=Abhd11 PE=1 SV=1
123020000	118930000	110260000	94557000	104220000	75559000	1.31816	0.360492	Abhd12	sp|Q99LR1|ABD12_MOUSE Lysophosphatidylserine lipase ABHD12 OS=Mus musculus (Mouse) OX=10090 GN=Abhd12 PE=1 SV=2
15575000	18683000	17027000	24904000	18171000	21339000	0.956418	-0.328837	Abhd13	sp|Q80UX8|ABHDD_MOUSE Protein ABHD13 OS=Mus musculus (Mouse) OX=10090 GN=Abhd13 PE=2 SV=1
192180000	235660000	341080000	246000000	207090000	299920000	0.0346502	0.0301645	Abhd14b	sp|Q8VCR7|ABHEB_MOUSE Protein ABHD14B OS=Mus musculus (Mouse) OX=10090 GN=Abhd14b PE=1 SV=1
149100000	128640000	126620000	86598000	136670000	141220000	0.283165	0.149769	Abhd16a	sp|Q9Z1Q2|ABHGA_MOUSE Phosphatidylserine lipase ABHD16A OS=Mus musculus (Mouse) OX=10090 GN=Abhd16a PE=1 SV=3
67318000	72559000	70245000	60057000	81499000	78819000	0.189108	-0.0687333	Abhd17b	sp|Q7M759|AB17B_MOUSE Alpha/beta hydrolase domain-containing protein 17B OS=Mus musculus (Mouse) OX=10090 GN=Abhd17b PE=1 SV=1
72654000	47235000	44020000	50595000	51362000	98540000	0.267006	-0.290686	Abhd17c	sp|Q8VCV1|AB17C_MOUSE Alpha/beta hydrolase domain-containing protein 17C OS=Mus musculus (Mouse) OX=10090 GN=Abhd17c PE=1 SV=2
63357	63357	63357	63357	63357	63357	#DIV/0!	0	Abhd3	sp|Q91ZH7|ABHD3_MOUSE Phospholipase ABHD3 OS=Mus musculus (Mouse) OX=10090 GN=Abhd3 PE=1 SV=1
62521000	50758000	34721000	68307000	48910000	38874000	0.0806094	-0.0767902	Abhd4	sp|Q8VD66|ABHD4_MOUSE (Lyso)-N-acylphosphatidylethanolamine lipase OS=Mus musculus (Mouse) OX=10090 GN=Abhd4 PE=1 SV=1
34971000	39467000	33993000	63357	40853000	40575000	0.262255	0.412058	Abhd5	sp|Q9DBL9|ABHD5_MOUSE 1-acylglycerol-3-phosphate O-acyltransferase ABHD5 OS=Mus musculus (Mouse) OX=10090 GN=Abhd5 PE=1 SV=1
72150000	103090000	70827000	96586000	75382000	112690000	0.354484	-0.210178	Abhd6	sp|Q8R2Y0|ABHD6_MOUSE Monoacylglycerol lipase ABHD6 OS=Mus musculus (Mouse) OX=10090 GN=Abhd6 PE=1 SV=1
198070000	190230000	205940000	155430000	217980000	309200000	0.26169	-0.200016	Abi1	sp|Q8CBW3|ABI1_MOUSE Abl interactor 1 OS=Mus musculus (Mouse) OX=10090 GN=Abi1 PE=1 SV=3
63357	63357	4294800	63357	63357	994790	0.310954	1.97911	Abi2	sp|P62484|ABI2_MOUSE Abl interactor 2 OS=Mus musculus (Mouse) OX=10090 GN=Abi2 PE=1 SV=1
240690000	336890000	315780000	162830000	209750000	380070000	0.258714	0.247263	Ablim1	sp|Q8K4G5|ABLM1_MOUSE Actin-binding LIM protein 1 OS=Mus musculus (Mouse) OX=10090 GN=Ablim1 PE=1 SV=1
17079000	26650000	18974000	13694000	13432000	63357	1.03567	1.20549	Ablim3	sp|Q69ZX8|ABLM3_MOUSE Actin-binding LIM protein 3 OS=Mus musculus (Mouse) OX=10090 GN=Ablim3 PE=1 SV=2
54782000	44460000	57005000	33237000	37612000	57367000	0.485814	0.285252	Abr	sp|Q5SSL4|ABR_MOUSE Active breakpoint cluster region-related protein OS=Mus musculus (Mouse) OX=10090 GN=Abr PE=1 SV=1
184380000	89129000	96768000	105550000	89314000	47460000	0.535618	0.611668	Abracl	sp|Q4KML4|ABRAL_MOUSE Costars family protein ABRACL OS=Mus musculus (Mouse) OX=10090 GN=Abracl PE=1 SV=1
28382000	19945000	14138000	30962000	19334000	16386000	0.0817854	-0.0942493	Abt1	sp|Q9QYL7|ABT1_MOUSE Activator of basal transcription 1 OS=Mus musculus (Mouse) OX=10090 GN=Abt1 PE=2 SV=1
1148800000	1171100000	1078600000	1297000000	1444200000	1192800000	1.07474	-0.211099	Acaa1a	sp|Q921H8|THIKA_MOUSE 3-ketoacyl-CoA thiolase A, peroxisomal OS=Mus musculus (Mouse) OX=10090 GN=Acaa1a PE=1 SV=1
63357	63357	63357	63357	63357	63357	#DIV/0!	0	Acaa1b	sp|Q8VCH0|THIKB_MOUSE 3-ketoacyl-CoA thiolase B, peroxisomal OS=Mus musculus (Mouse) OX=10090 GN=Acaa1b PE=1 SV=1
1438300000	1343200000	1316300000	1867600000	2021400000	1861500000	2.99746	-0.488838	Acaa2	sp|Q8BWT1|THIM_MOUSE 3-ketoacyl-CoA thiolase, mitochondrial OS=Mus musculus (Mouse) OX=10090 GN=Acaa2 PE=1 SV=3
398410000	404290000	297090000	373150000	352040000	435470000	0.180007	-0.0777173	Acaca	sp|Q5SWU9|ACACA_MOUSE Acetyl-CoA carboxylase 1 OS=Mus musculus (Mouse) OX=10090 GN=Acaca PE=1 SV=1
190200000	188560000	151350000	221810000	185930000	232460000	0.903617	-0.272231	Acad10	sp|Q8K370|ACD10_MOUSE Acyl-CoA dehydrogenase family member 10 OS=Mus musculus (Mouse) OX=10090 GN=Acad10 PE=1 SV=1
196770000	198610000	194070000	203730000	238550000	207290000	0.834437	-0.140116	Acad11	sp|Q80XL6|ACD11_MOUSE Acyl-CoA dehydrogenase family member 11 OS=Mus musculus (Mouse) OX=10090 GN=Acad11 PE=1 SV=2
63357	63357	5611200	63357	63357	34217000	0.342127	-2.58145	Acad12	tr|D3Z7X0|D3Z7X0_MOUSE Acyl-Coenzyme A dehydrogenase family, member 12 OS=Mus musculus (Mouse) OX=10090 GN=Acad12 PE=1 SV=1
136020000	127140000	131090000	99502000	101560000	126110000	1.17792	0.269061	Acad8	sp|Q9D7B6|ACAD8_MOUSE Isobutyryl-CoA dehydrogenase, mitochondrial OS=Mus musculus (Mouse) OX=10090 GN=Acad8 PE=1 SV=2
863830000	808120000	834550000	770120000	957290000	973650000	0.409585	-0.107851	Acad9	sp|Q8JZN5|ACAD9_MOUSE Complex I assembly factor ACAD9, mitochondrial OS=Mus musculus (Mouse) OX=10090 GN=Acad9 PE=1 SV=2
3496000000	3288100000	3399300000	3783500000	3877100000	3264300000	0.547004	-0.101401	Acadl	sp|P51174|ACADL_MOUSE Long-chain specific acyl-CoA dehydrogenase, mitochondrial OS=Mus musculus (Mouse) OX=10090 GN=Acadl PE=1 SV=2
508470000	467040000	485070000	378080000	405590000	534900000	0.402573	0.147567	Acadm	sp|P45952|ACADM_MOUSE Medium-chain specific acyl-CoA dehydrogenase, mitochondrial OS=Mus musculus (Mouse) OX=10090 GN=Acadm PE=1 SV=1
378250000	406150000	385310000	468390000	504530000	533520000	2.25747	-0.364992	Acads	sp|Q07417|ACADS_MOUSE Short-chain specific acyl-CoA dehydrogenase, mitochondrial OS=Mus musculus (Mouse) OX=10090 GN=Acads PE=1 SV=2
311060000	354750000	359490000	344030000	405700000	470320000	0.753602	-0.250894	Acadsb	sp|Q9DBL1|ACDSB_MOUSE Short/branched chain specific acyl-CoA dehydrogenase, mitochondrial OS=Mus musculus (Mouse) OX=10090 GN=Acadsb PE=1 SV=1
974830000	1031200000	931260000	805800000	828320000	957350000	0.975501	0.180715	Acadvl	sp|P50544|ACADV_MOUSE Very long-chain specific acyl-CoA dehydrogenase, mitochondrial OS=Mus musculus (Mouse) OX=10090 GN=Acadvl PE=1 SV=3
46394000	42904000	52591000	42945000	52609000	57381000	0.291911	-0.108156	Acap2	sp|Q6ZQK5|ACAP2_MOUSE Arf-GAP with coiled-coil, ANK repeat and PH domain-containing protein 2 OS=Mus musculus (Mouse) OX=10090 GN=Acap2 PE=1 SV=2
839450000	814930000	841680000	836340000	957680000	799410000	0.267172	-0.0552088	Acat1	sp|Q8QZT1|THIL_MOUSE Acetyl-CoA acetyltransferase, mitochondrial OS=Mus musculus (Mouse) OX=10090 GN=Acat1 PE=1 SV=1
918180000	700710000	786260000	729710000	833080000	948860000	0.147624	-0.0625086	Acat2;Acat3	sp|Q8CAY6|THIC_MOUSE Acetyl-CoA acetyltransferase, cytosolic OS=Mus musculus (Mouse) OX=10090 GN=Acat2 PE=1 SV=2;tr|Q80X81|Q80X81_MOUSE Acetyl-Coenzyme A acetyltransferase 3 OS=Mus musculus (Mouse) OX=10090 GN=Acat3 PE=1 SV=1
238420000	209810000	205650000	255950000	241640000	340600000	0.878918	-0.358251	Acbd3	sp|Q8BMP6|GCP60_MOUSE Golgi resident protein GCP60 OS=Mus musculus (Mouse) OX=10090 GN=Acbd3 PE=1 SV=3
67005000	81846000	75354000	78945000	66539000	96462000	0.240755	-0.109867	Acbd5	sp|Q5XG73|ACBD5_MOUSE Acyl-CoA-binding domain-containing protein 5 OS=Mus musculus (Mouse) OX=10090 GN=Acbd5 PE=1 SV=1
8109500	19910000	63357	23874000	12299000	63357	0.109569	-0.367748	Acbd7	sp|Q9D258|ACBD7_MOUSE Acyl-CoA-binding domain-containing protein 7 OS=Mus musculus (Mouse) OX=10090 GN=Acbd7 PE=3 SV=2
63357	63357	63357	63357	63357	63357	#DIV/0!	0	Accs	sp|A2AIG8|1A1L1_MOUSE 1-aminocyclopropane-1-carboxylate synthase-like protein 1 OS=Mus musculus (Mouse) OX=10090 GN=Accs PE=2 SV=1
[truncated: 7,312 more rows]

## Sheet: mTECs ALI 7 Total
LFQ intensity SrsfHom-ALI7-1	LFQ intensity SrsfHom-ALI7-2	LFQ intensity SrsfHom-ALI7-3	LFQ intensity W-ALI7-1	LFQ intensity W-ALI7-2	LFQ intensity W-ALI7-3	Log10 p ALI 7	Log2 FC ALI 7	Gene names	Fasta headers
[truncated: 7,414 more rows]

[truncated: 4 more sheets: mTECs ALI10 Totals, mTECs ALI14 Totals, mTECs ALI18 Totals, P22-23 Testes Totals]
