# Supplementary material for: Nucleo-cytoplasmic shuttling of splicing factor SRSF1 is required for development and cilia function
Source: eLife. 2021 Aug 2;10:e65104. doi: 10.7554/eLife.65104 (PMC8352595; doi:10.7554/eLife.65104)
Supplement: Figure 4—source data 1. [file elife-65104-fig4-data1.xlsx]

## Sheet: Table Legend
Data Source Figure 4 Panles G and H
ALI 14
Proteins significantly underrepresented in the total proteomes of mTEC cultures at airlifted Day 14 (ALI14).
LFQs from three cultures derived from Srsf1NRS/NRS (Pink) or Srsf1+/+ (Green) grown in parallel
P22
Proteins significantly underrepresented in the total proteomes of testes from littermates or age matching animals derived from same breeders at 22 or 23 post natal days as indicated in each column
LFQs from three Srsf1NRS/NRS animals (Pink) an four Srsf1+/+ (Green) animals
All LFQ values = 0 were adjusted for staristical analysis purpouses to the LFQ of lowest intensity in the dataset:
63357 in mTECs dataset
174660 in Testes dataset

## Sheet: Underrepresented Srsf1NRS ALI14
LFQ intensity Srf1Hom3-AI14	LFQ intensity Srf1Hom1-AI14	LFQ intensity Srf1Hom2-AI14	LFQ intensity W-1-AI-14	LFQ intensity W-2-AI-14	LFQ intensity W-3-AI-14	Log10 p ALI 14	Log2 FC ALI 14	Gene names	Fasta headers
63357	10414000	8811700	30806000	18796000	18063000	1.43259	-1.81063	2410004P03Rik	tr|A0A087WQY2|A0A087WQY2_MOUSE RIKEN cDNA 2410004P03 gene OS=Mus musculus (Mouse) OX=10090 GN=2410004P03Rik PE=4 SV=1
8978900	19308000	14587000	60320000	74171000	62416000	3.21502	-2.19934	2610028H24Rik	tr|G5E8K1|G5E8K1_MOUSE DUF4587 domain-containing protein OS=Mus musculus (Mouse) OX=10090 GN=2610028H24Rik PE=4 SV=1
63357	63357	3106400	9025300	8621900	8325400	2.73377	-3.00599	A0A0J9YTR2	tr|A0A0J9YTR2|A0A0J9YTR2_MOUSE RIKEN cDNA 0610012G03 gene OS=Mus musculus (Mouse) OX=10090 GN=0610012G03Rik PE=1 SV=1
17096000	17665000	63357	59861000	40457000	32127000	1.4994	-1.92722	A0A1B0GT42	tr|A0A1B0GT42|A0A1B0GT42_MOUSE Predicted gene, 32742 OS=Mus musculus (Mouse) OX=10090 GN=Gm32742 PE=4 SV=1
4494000	8736300	63357	12106000	10467000	16236000	1.31225	-1.54565	Aamdc	sp|Q8R0P4|AAMDC_MOUSE Mth938 domain-containing protein OS=Mus musculus (Mouse) OX=10090 GN=Aamdc PE=1 SV=1
63357	63357	63357	44252000	40844000	16296000	1.73039	-9.05919	Aars2	sp|Q14CH7|SYAM_MOUSE Alanine--tRNA ligase, mitochondrial OS=Mus musculus (Mouse) OX=10090 GN=Aars2 PE=1 SV=1
63357	63357	63357	5183900	8128600	5962100	2.70979	-6.66402	Abi2	sp|P62484|ABI2_MOUSE Abl interactor 2 OS=Mus musculus (Mouse) OX=10090 GN=Abi2 PE=1 SV=1
306230000	390360000	340580000	1186700000	1125700000	1224600000	4.60247	-1.76987	Acsm1	sp|Q91VA0|ACSM1_MOUSE Acyl-coenzyme A synthetase ACSM1, mitochondrial OS=Mus musculus (Mouse) OX=10090 GN=Acsm1 PE=1 SV=1
63357	63357	63357	29546000	20196000	29778000	2.9547	-8.70864	Acy3	sp|Q91XE4|ACY3_MOUSE N-acyl-aromatic-L-amino acid amidohydrolase (carboxylate-forming) OS=Mus musculus (Mouse) OX=10090 GN=Acy3 PE=1 SV=1
63357	63357	63357	21292000	14555000	8839600	1.83581	-7.87716	Adck5	sp|Q80V03|ADCK5_MOUSE Uncharacterized aarF domain-containing protein kinase 5 OS=Mus musculus (Mouse) OX=10090 GN=Adck5 PE=2 SV=2
63357	63357	5687600	17843000	11644000	10295000	1.71588	-2.77443	Aes	sp|P63002|TLE5_MOUSE TLE family member 5 OS=Mus musculus (Mouse) OX=10090 GN=Tle5 PE=1 SV=1
63357	63357	63357	13876000	13911000	22739000	2.32697	-8.05434	Agap1	sp|Q8BXK8|AGAP1_MOUSE Arf-GAP with GTPase, ANK repeat and PH domain-containing protein 1 OS=Mus musculus (Mouse) OX=10090 GN=Agap1 PE=1 SV=1
63357	63357	63357	5863200	7165700	7255500	3.92622	-6.73769	Agmo	sp|Q8BS35|ALKMO_MOUSE Alkylglycerol monooxygenase OS=Mus musculus (Mouse) OX=10090 GN=Agmo PE=1 SV=1
32026000	78444000	171910000	259990000	275490000	360670000	1.77719	-1.6661	Agr3	sp|Q8R3W7|AGR3_MOUSE Anterior gradient protein 3 OS=Mus musculus (Mouse) OX=10090 GN=Agr3 PE=2 SV=1
63357	63357	63357	25738000	24237000	28910000	4.34882	-8.69707	Ahr	sp|P30561|AHR_MOUSE Aryl hydrocarbon receptor OS=Mus musculus (Mouse) OX=10090 GN=Ahr PE=1 SV=3
63357	63357	63357	9608700	5374800	7245400	2.41011	-6.86975	Aif1l	sp|Q9EQX4|AIF1L_MOUSE Allograft inflammatory factor 1-like OS=Mus musculus (Mouse) OX=10090 GN=Aif1l PE=1 SV=1
53533000	178260000	145180000	403370000	366610000	392380000	2.59679	-1.62452	Ak7	sp|Q9D2H2|KAD7_MOUSE Adenylate kinase 7 OS=Mus musculus (Mouse) OX=10090 GN=Ak7 PE=1 SV=1
16712000	119900000	145860000	344250000	435170000	427190000	2.4856	-2.09478	Ak8	sp|Q32M07|KAD8_MOUSE Adenylate kinase 8 OS=Mus musculus (Mouse) OX=10090 GN=Ak8 PE=1 SV=1
63357	63357	63357	41774000	51570000	43825000	3.97371	-9.4952	Akip1	sp|Q9JJR5|AKIP1_MOUSE A-kinase-interacting protein 1 OS=Mus musculus (Mouse) OX=10090 GN=Akip1 PE=2 SV=1
10719000	63357	63357	15629000	16210000	21548000	1.61449	-2.29936	Akr1c14	tr|Q91WT7|Q91WT7_MOUSE Aldo_ket_red domain-containing protein OS=Mus musculus (Mouse) OX=10090 GN=Akr1c14 PE=1 SV=1
266510000	219200000	230610000	654930000	724640000	792790000	3.48345	-1.60059	Akr1c18	sp|Q8K023|AKC1H_MOUSE Aldo-keto reductase family 1 member C18 OS=Mus musculus (Mouse) OX=10090 GN=Akr1c18 PE=1 SV=2
7605100	2334000	4636300	19470000	12101000	25159000	1.58301	-1.96058	Alb	sp|P07724|ALBU_MOUSE Serum albumin OS=Mus musculus (Mouse) OX=10090 GN=Alb PE=1 SV=3
63357	63357	63357	11012000	7718800	10625000	3.13835	-7.27096	Aldh1b1	sp|Q9CZS1|AL1B1_MOUSE Aldehyde dehydrogenase X, mitochondrial OS=Mus musculus (Mouse) OX=10090 GN=Aldh1b1 PE=1 SV=1
63357	63357	63357	6809300	9316600	9129900	3.30987	-7.05393	Alkbh7	sp|Q9D6Z0|ALKB7_MOUSE Alpha-ketoglutarate-dependent dioxygenase alkB homolog 7, mitochondrial OS=Mus musculus (Mouse) OX=10090 GN=Alkbh7 PE=1 SV=1
63357	63357	63357	1680000	1633500	3107000	1.89615	-5.07808	Amt	sp|Q8CFA2|GCST_MOUSE Aminomethyltransferase, mitochondrial OS=Mus musculus (Mouse) OX=10090 GN=Amt PE=1 SV=1
63357	63357	63357	133560000	61229000	54047000	1.50918	-10.3544	Ankfn1	tr|A0A571BF63|A0A571BF63_MOUSE Ankyrin-repeat and fibronectin type III domain-containing 1 OS=Mus musculus (Mouse) OX=10090 GN=Ankfn1 PE=4 SV=1
63357	63357	63357	17197000	13578000	11138000	2.85773	-7.78472	Ankrd13d	sp|Q6PD24|AN13D_MOUSE Ankyrin repeat domain-containing protein 13D OS=Mus musculus (Mouse) OX=10090 GN=Ankrd13d PE=1 SV=2
63357	63357	63357	15677000	16720000	13848000	4.27928	-7.92662	Ankrd66	tr|J3QNN4|J3QNN4_MOUSE ANK_REP_REGION domain-containing protein OS=Mus musculus (Mouse) OX=10090 GN=Ankrd66 PE=4 SV=1
12134000	63357	24662000	161340000	133130000	101160000	2.50622	-3.42405	Anxa10	sp|Q9QZ10|ANX10_MOUSE Annexin A10 OS=Mus musculus (Mouse) OX=10090 GN=Anxa10 PE=2 SV=2
63357	63357	63357	108270000	126270000	121490000	4.60016	-10.8712	Aox1	sp|O54754|AOXA_MOUSE Aldehyde oxidase 1 OS=Mus musculus (Mouse) OX=10090 GN=Aox1 PE=1 SV=2
21217000	34746000	14272000	123580000	131730000	88650000	2.48518	-2.29198	Aox2	sp|Q5SGK3|AOXB_MOUSE Aldehyde oxidase 2 OS=Mus musculus (Mouse) OX=10090 GN=Aox2 PE=1 SV=2
63357	63357	63357	10368000	9237500	18063000	1.96755	-7.63068	Ap3m2	sp|Q8R2R9|AP3M2_MOUSE AP-3 complex subunit mu-2 OS=Mus musculus (Mouse) OX=10090 GN=Ap3m2 PE=1 SV=1
63357	43292000	63357	70552000	69717000	80476000	1.78837	-2.34599	Arhgef28	sp|P97433|ARG28_MOUSE Rho guanine nucleotide exchange factor 28 OS=Mus musculus (Mouse) OX=10090 GN=Arhgef28 PE=1 SV=1
63357	63357	63357	5193400	5638700	7673300	2.87776	-6.60526	Arl15	sp|Q8BGR6|ARL15_MOUSE ADP-ribosylation factor-like protein 15 OS=Mus musculus (Mouse) OX=10090 GN=Arl15 PE=1 SV=1
63357	63357	34727000	43772000	69138000	68121000	1.57467	-2.37685	Armc9	sp|Q9D2I5|ARMC9_MOUSE LisH domain-containing protein ARMC9 OS=Mus musculus (Mouse) OX=10090 GN=Armc9 PE=1 SV=1
7231300	63357	63357	28049000	18614000	21485000	2.27734	-3.21128	Armcx3	sp|Q8BHS6|ARMX3_MOUSE Armadillo repeat-containing X-linked protein 3 OS=Mus musculus (Mouse) OX=10090 GN=Armcx3 PE=1 SV=1
63357	63357	63357	102390000	175630000	108850000	2.27504	-10.9911	Arsa	sp|P50428|ARSA_MOUSE Arylsulfatase A OS=Mus musculus (Mouse) OX=10090 GN=Arsa PE=1 SV=2
63357	34805000	30466000	72495000	60530000	71639000	1.7951	-1.64734	Arsb	sp|P50429|ARSB_MOUSE Arylsulfatase B OS=Mus musculus (Mouse) OX=10090 GN=Arsb PE=1 SV=3
63357	63357	63357	8410100	7278900	2938800	1.67574	-6.61478	Asb6	sp|Q91ZU1|ASB6_MOUSE Ankyrin repeat and SOCS box protein 6 OS=Mus musculus (Mouse) OX=10090 GN=Asb6 PE=1 SV=1
63357	13771000	13076000	21242000	32508000	27906000	1.5241	-1.6014	Atf7ip	sp|Q7TT18|MCAF1_MOUSE Activating transcription factor 7-interacting protein 1 OS=Mus musculus (Mouse) OX=10090 GN=Atf7ip PE=1 SV=1
63357	34319000	26238000	71014000	48990000	53067000	1.41304	-1.51349	Athl1	sp|Q8BP56|PGGHG_MOUSE Protein-glucosylgalactosylhydroxylysine glucosidase OS=Mus musculus (Mouse) OX=10090 GN=Pgghg PE=1 SV=1
63357	63357	63357	11428000	7246700	18672000	1.6854	-7.6183	Atp11c	sp|Q9QZW0|AT11C_MOUSE Phospholipid-transporting ATPase 11C OS=Mus musculus (Mouse) OX=10090 GN=Atp11c PE=1 SV=2
63357	63357	63357	6796000	5504300	4746900	3.14526	-6.48685	Atp2a3	sp|Q64518|AT2A3_MOUSE Sarcoplasmic/endoplasmic reticulum calcium ATPase 3 OS=Mus musculus (Mouse) OX=10090 GN=Atp2a3 PE=1 SV=3
63357	63357	63357	17126000	16910000	10212000	2.53189	-7.86293	Atp6v1c2	sp|Q99L60|VATC2_MOUSE V-type proton ATPase subunit C 2 OS=Mus musculus (Mouse) OX=10090 GN=Atp6v1c2 PE=1 SV=1
63357	18150000	22096000	52853000	55977000	45045000	2.13555	-1.93257	Atp8a1	sp|P70704|AT8A1_MOUSE Phospholipid-transporting ATPase IA OS=Mus musculus (Mouse) OX=10090 GN=Atp8a1 PE=1 SV=2
63357	241100000	63357	470700000	335600000	307190000	1.42621	-2.20663	Atr	sp|Q9JKK8|ATR_MOUSE Serine/threonine-protein kinase ATR OS=Mus musculus (Mouse) OX=10090 GN=Atr PE=1 SV=2
63357	63357	63357	8409500	10261000	10765000	3.77316	-7.27487	B3galt6	sp|Q91Z92|B3GT6_MOUSE Beta-1,3-galactosyltransferase 6 OS=Mus musculus (Mouse) OX=10090 GN=B3galt6 PE=2 SV=1
63357	63357	10557000	16982000	16657000	26504000	1.58926	-2.49298	B3gat3	sp|P58158|B3GA3_MOUSE Galactosylgalactosylxylosylprotein 3-beta-glucuronosyltransferase 3 OS=Mus musculus (Mouse) OX=10090 GN=B3gat3 PE=1 SV=1
63357	18757000	8368800	32311000	44077000	43386000	2.01969	-2.13921	B4galt4	sp|Q9JJ04|B4GT4_MOUSE Beta-1,4-galactosyltransferase 4 OS=Mus musculus (Mouse) OX=10090 GN=B4galt4 PE=2 SV=1
63357	63717000	67094000	113420000	127440000	164090000	1.58188	-1.62956	B9d1	sp|Q9R1S0|B9D1_MOUSE B9 domain-containing protein 1 OS=Mus musculus (Mouse) OX=10090 GN=B9d1 PE=1 SV=1
63357	44035000	33036000	90917000	90782000	81142000	1.98257	-1.76874	B9d2	sp|Q3UK10|B9D2_MOUSE B9 domain-containing protein 2 OS=Mus musculus (Mouse) OX=10090 GN=B9d2 PE=1 SV=2
63357	63357	16599000	29829000	31868000	26293000	1.83991	-2.39527	Baz1a	sp|O88379|BAZ1A_MOUSE Bromodomain adjacent to zinc finger domain protein 1A OS=Mus musculus (Mouse) OX=10090 GN=Baz1a PE=1 SV=3
63357	63357	63357	9231000	12055000	9407700	3.4313	-7.33526	Baz2a	sp|Q91YE5|BAZ2A_MOUSE Bromodomain adjacent to zinc finger domain protein 2A OS=Mus musculus (Mouse) OX=10090 GN=Baz2a PE=1 SV=2
63357	33253000	47851000	75484000	83515000	84310000	1.69968	-1.58382	Bbs4	sp|Q8C1Z7|BBS4_MOUSE Bardet-Biedl syndrome 4 protein homolog OS=Mus musculus (Mouse) OX=10090 GN=Bbs4 PE=1 SV=1
63357	63357	44048000	84007000	93806000	73776000	1.92765	-2.50978	Bbs9	sp|Q811G0|PTHB1_MOUSE Protein PTHB1 OS=Mus musculus (Mouse) OX=10090 GN=Bbs9 PE=1 SV=2
63357	31697000	63357	35826000	97911000	102390000	1.33175	-2.89139	Bckdhb	sp|Q6P3A8|ODBB_MOUSE 2-oxoisovalerate dehydrogenase subunit beta, mitochondrial OS=Mus musculus (Mouse) OX=10090 GN=Bckdhb PE=1 SV=2
63357	63357	7777400	21128000	27005000	34761000	2.21719	-3.39059	Bckdk	sp|O55028|BCKD_MOUSE [3-methyl-2-oxobutanoate dehydrogenase [lipoamide]] kinase, mitochondrial OS=Mus musculus (Mouse) OX=10090 GN=Bckdk PE=1 SV=1
63357	9544900	7129000	14877000	18927000	17359000	1.69126	-1.61204	Bcl2l14	sp|Q9CPT0|B2L14_MOUSE Apoptosis facilitator Bcl-2-like protein 14 OS=Mus musculus (Mouse) OX=10090 GN=Bcl2l14 PE=1 SV=1
63357	63357	63357	10844000	19947000	14666000	2.33446	-7.90182	Bcl9	sp|Q9D219|BCL9_MOUSE B-cell CLL/lymphoma 9 protein OS=Mus musculus (Mouse) OX=10090 GN=Bcl9 PE=1 SV=3
3102800	4027800	7087700	14984000	19130000	14107000	2.35079	-1.76191	Bet1l	sp|O35153|BET1L_MOUSE BET1-like protein OS=Mus musculus (Mouse) OX=10090 GN=Bet1l PE=3 SV=1
63357	63357	63357	20424000	16652000	14276000	3.16902	-8.07774	Bloc1s3	sp|Q5U5M8|BL1S3_MOUSE Biogenesis of lysosome-related organelles complex 1 subunit 3 OS=Mus musculus (Mouse) OX=10090 GN=Bloc1s3 PE=1 SV=1
1501100	63357	63357	5549500	3911100	4902700	2.48423	-3.14138	Bnipl	sp|Q99JU7|BNIPL_MOUSE Bcl-2/adenovirus E1B 19 kDa-interacting protein 2-like protein OS=Mus musculus (Mouse) OX=10090 GN=Bnipl PE=2 SV=1
63357	15516000	11250000	34516000	36230000	24507000	1.74778	-1.82795	Bpgm	sp|P15327|PMGE_MOUSE Bisphosphoglycerate mutase OS=Mus musculus (Mouse) OX=10090 GN=Bpgm PE=1 SV=2
45663000	162140000	111610000	622400000	1148600000	602370000	1.7047	-2.89344	Bpifa1	sp|P97361|BPIA1_MOUSE BPI fold-containing family A member 1 OS=Mus musculus (Mouse) OX=10090 GN=Bpifa1 PE=1 SV=3
63357	63357	63357	10087000	11144000	6083200	2.37505	-7.16697	Bpifb1	sp|Q61114|BPIB1_MOUSE BPI fold-containing family B member 1 OS=Mus musculus (Mouse) OX=10090 GN=Bpifb1 PE=2 SV=4
63357	63357	63357	9445100	9076800	6461000	3.03586	-7.03826	C10orf53	sp|Q3KNL4|CJ053_MOUSE UPF0728 protein C10orf53 homolog OS=Mus musculus (Mouse) OX=10090 GN=MGI:1914335 PE=3 SV=1
63357	5290900	63357	12106000	10784000	13501000	2.24554	-2.74785	C11orf49	sp|Q8BHR8|CK049_MOUSE UPF0705 protein C11orf49 homolog OS=Mus musculus (Mouse) OX=10090 GN=MGI:1915079 PE=1 SV=1
63357	14400000	63357	23104000	25822000	21506000	1.70789	-2.27752	C1orf189	sp|Q9D9D9|CA189_MOUSE Uncharacterized protein C1orf189 homolog OS=Mus musculus (Mouse) OX=10090 GN=MGI:1920795 PE=4 SV=2
63357	15504000	30476000	55301000	39362000	62179000	1.53745	-1.76825	C1orf194	sp|Q9DAD0|CA194_MOUSE Protein C1orf194 homolog OS=Mus musculus (Mouse) OX=10090 GN=MGI:1922754 PE=1 SV=1
63357	14979000	20329000	53739000	60363000	48251000	2.4228	-2.19848	Ca8	sp|P28651|CAH8_MOUSE Carbonic anhydrase-related protein OS=Mus musculus (Mouse) OX=10090 GN=Ca8 PE=1 SV=5
63357	63357	63357	8938900	6281900	7630000	3.22447	-6.90956	Cabcoco1	sp|Q8CDT7|CBCO1_MOUSE Ciliary-associated calcium-binding coiled-coil protein 1 OS=Mus musculus (Mouse) OX=10090 GN=Cabcoco1 PE=1 SV=2
63357	63357	6814600	10417000	13251000	8830900	1.51672	-2.22711	Cacfd1	sp|Q8BG21|FLOWR_MOUSE Calcium channel flower homolog OS=Mus musculus (Mouse) OX=10090 GN=Cacfd1 PE=1 SV=1
63357	63357	63357	13226000	12167000	13804000	4.95938	-7.68806	Caps2	sp|Q8BUG5|CAYP2_MOUSE Calcyphosin-2 OS=Mus musculus (Mouse) OX=10090 GN=Caps2 PE=2 SV=2
57949000	328030000	333710000	650340000	762450000	700200000	2.06563	-1.55384	Capsl	sp|Q6P8Y1|CAPSL_MOUSE Calcyphosin-like protein OS=Mus musculus (Mouse) OX=10090 GN=Capsl PE=2 SV=4
63357	63357	63357	10506000	12003000	12413000	4.43114	-7.52145	Carnmt1	sp|Q80UY1|CARME_MOUSE Carnosine N-methyltransferase OS=Mus musculus (Mouse) OX=10090 GN=Carnmt1 PE=1 SV=1
63357	63357	63357	63421000	50091000	44447000	3.13734	-9.6988	Catip	sp|B9EKE5|CATIP_MOUSE Ciliogenesis-associated TTC17-interacting protein OS=Mus musculus (Mouse) OX=10090 GN=Catip PE=2 SV=1
63357	63357	63357	8248000	5045500	6050900	2.60062	-6.66923	Cbll1	sp|Q9JIY2|HAKAI_MOUSE E3 ubiquitin-protein ligase Hakai OS=Mus musculus (Mouse) OX=10090 GN=Cbll1 PE=1 SV=1
63357	21568000	63357	64593000	54064000	68094000	2.56761	-3.1057	Ccdc103	sp|Q9D9P2|CC103_MOUSE Coiled-coil domain-containing protein 103 OS=Mus musculus (Mouse) OX=10090 GN=Ccdc103 PE=1 SV=1 Dynein attachment factor required for cilia motility
36639000	121710000	133750000	349400000	319250000	309600000	2.65145	-1.74375	Ccdc114	sp|Q3UX62|CC114_MOUSE Coiled-coil domain-containing protein 114 OS=Mus musculus (Mouse) OX=10090 GN=Ccdc114 PE=2 SV=1
63357	63357	63357	18034000	9489400	14710000	2.31167	-7.7957	Ccdc115	sp|Q8VE99|CC115_MOUSE Coiled-coil domain-containing protein 115 OS=Mus musculus (Mouse) OX=10090 GN=Ccdc115 PE=1 SV=1
14907000	102310000	51947000	153680000	163470000	164710000	1.81989	-1.51019	Ccdc17	sp|Q8CE13|CCD17_MOUSE Coiled-coil domain-containing protein 17 OS=Mus musculus (Mouse) OX=10090 GN=Ccdc17 PE=2 SV=1
63357	43521000	40871000	122880000	117510000	99965000	2.25678	-2.01078	Ccdc178	sp|Q8C5V8|CC187_MOUSE Coiled-coil domain-containing protein 187 OS=Mus musculus (Mouse) OX=10090 GN=Ccdc187 PE=2 SV=1
63357	6071700	63357	14329000	21557000	23339000	2.18294	-3.25624	Ccdc191	tr|J3QQ27|J3QQ27_MOUSE Coiled-coil domain-containing 191 OS=Mus musculus (Mouse) OX=10090 GN=Ccdc191 PE=1 SV=1
23285000	106140000	126680000	281230000	319040000	297220000	2.51206	-1.80916	Ccdc33	sp|Q3ULW6|CCD33_MOUSE Coiled-coil domain-containing protein 33 OS=Mus musculus (Mouse) OX=10090 GN=Ccdc33 PE=2 SV=2
63357	19687000	13977000	24684000	32724000	39832000	1.35762	-1.52763	Ccdc61	sp|Q3UJV1|CCD61_MOUSE Coiled-coil domain-containing protein 61 OS=Mus musculus (Mouse) OX=10090 GN=Ccdc61 PE=1 SV=1. Microtubule-binding centrosomal protein required for centriole cohesion,
63357	63357	63357	16620000	16783000	19046000	4.61697	-8.10823	Ccdc68	sp|Q8BVC4|CCD68_MOUSE Coiled-coil domain-containing protein 68 OS=Mus musculus (Mouse) OX=10090 GN=Ccdc68 PE=2 SV=1
14895000	63357	27339000	55569000	83123000	59333000	1.94628	-2.22704	Ccdc78	sp|D3Z5T1|CCD78_MOUSE Coiled-coil domain-containing protein 78 OS=Mus musculus (Mouse) OX=10090 GN=Ccdc78 PE=3 SV=2
63357	63186000	43701000	114700000	115170000	117230000	1.89321	-1.69841	Cdc14a	sp|Q6GQT0|CC14A_MOUSE Dual specificity protein phosphatase CDC14A OS=Mus musculus (Mouse) OX=10090 GN=Cdc14a PE=1 SV=2
2540600	3334500	1616400	14153000	10396000	7515300	1.8377	-2.09764	Cdc34	sp|Q8CFI2|UB2R1_MOUSE Ubiquitin-conjugating enzyme E2 R1 OS=Mus musculus (Mouse) OX=10090 GN=Cdc34 PE=1 SV=1
63357	63357	63357	8286900	9365100	8397500	4.82997	-7.09857	Cdk20	sp|Q9JHU3|CDK20_MOUSE Cyclin-dependent kinase 20 OS=Mus musculus (Mouse) OX=10090 GN=Cdk20 PE=1 SV=1
63357	63357	63357	5471700	5937900	4630500	3.79774	-6.399	Cenpa	sp|O35216|CENPA_MOUSE Histone H3-like centromeric protein A OS=Mus musculus (Mouse) OX=10090 GN=Cenpa PE=2 SV=1
63357	12283000	5224100	16487000	22226000	35432000	1.33041	-2.0772	Cep104	sp|Q80V31|CE104_MOUSE Centrosomal protein of 104 kDa OS=Mus musculus (Mouse) OX=10090 GN=Cep104 PE=1 SV=1
130960000	390960000	302210000	784910000	891240000	817040000	2.59767	-1.59705	Cep135	sp|Q6P5D4|CP135_MOUSE Centrosomal protein of 135 kDa OS=Mus musculus (Mouse) OX=10090 GN=Cep135 PE=1 SV=1
63357	9928900	63357	11650000	13409000	16743000	1.36838	-2.05557	Cep19	sp|Q9CQA8|CEP19_MOUSE Centrosomal protein of 19 kDa OS=Mus musculus (Mouse) OX=10090 GN=Cep19 PE=2 SV=1
63357	63357	9796500	30689000	35893000	21402000	2.08673	-3.14836	Cep44	sp|Q5HZK1|CEP44_MOUSE Centrosomal protein of 44 kDa OS=Mus musculus (Mouse) OX=10090 GN=Cep44 PE=2 SV=1
63357	9332300	30701000	42614000	74644000	43872000	1.36051	-2.00667	Cep55	sp|Q8BT07|CEP55_MOUSE Centrosomal protein of 55 kDa OS=Mus musculus (Mouse) OX=10090 GN=Cep55 PE=1 SV=2
5737400	11811000	63357	18455000	14449000	19079000	1.44343	-1.5615	Cep70	sp|Q6IQY5|CEP70_MOUSE Centrosomal protein of 70 kDa OS=Mus musculus (Mouse) OX=10090 GN=Cep70 PE=2 SV=1
63357	63357	24084000	35687000	73350000	79513000	1.58516	-2.96123	Cers5	sp|Q9D6K9|CERS5_MOUSE Ceramide synthase 5 OS=Mus musculus (Mouse) OX=10090 GN=Cers5 PE=1 SV=1
63357	34777000	35309000	109890000	121580000	110750000	2.75026	-2.28642	Cfap126	sp|Q6P8X9|FLTOP_MOUSE Protein Flattop OS=Mus musculus (Mouse) OX=10090 GN=Cfap126 PE=1 SV=1
63357	41815000	20409000	73673000	64913000	85332000	1.79694	-1.84596	Cfap206	sp|Q6PE87|CF206_MOUSE Cilia- and flagella-associated protein 206 OS=Mus musculus (Mouse) OX=10090 GN=Cfap206 PE=2 SV=2
26712000	63357	14059000	36815000	38024000	42930000	1.49849	-1.5281	Cfap410	sp|Q8C6G1|CF410_MOUSE Cilia- and flagella-associated protein 410 OS=Mus musculus (Mouse) OX=10090 GN=Cfap410 PE=1 SV=1
46368000	194860000	198210000	446130000	389550000	415550000	2.1674	-1.50962	Cfap57	sp|Q9D180|CFA57_MOUSE Cilia- and flagella-associated protein 57 OS=Mus musculus (Mouse) OX=10090 GN=Cfap57 PE=1 SV=3
58146000	100110000	104290000	285910000	262290000	254200000	3.29354	-1.61175	Cfap58	sp|B2RW38|CFA58_MOUSE Cilia- and flagella-associated protein 58 OS=Mus musculus (Mouse) OX=10090 GN=Cfap58 PE=2 SV=1
63357	63357	63357	11789000	20688000	16280000	2.4893	-8.00293	Chchd5	sp|Q9CQP3|CHCH5_MOUSE Coiled-coil-helix-coiled-coil-helix domain-containing protein 5 OS=Mus musculus (Mouse) OX=10090 GN=Chchd5 PE=1 SV=1
63357	9510700	20989000	32481000	41563000	28978000	1.56146	-1.75309	Chga	sp|P26339|CMGA_MOUSE Chromogranin-A OS=Mus musculus (Mouse) OX=10090 GN=Chga PE=1 SV=1
66503000	101290000	104600000	398650000	321720000	272290000	2.46295	-1.86561	Clca1	sp|Q9D7Z6|CLCA1_MOUSE Calcium-activated chloride channel regulator 1 OS=Mus musculus (Mouse) OX=10090 GN=Clca1 PE=1 SV=2
63357	63357	15578000	122060000	123000000	103410000	3.75981	-4.47176	Clca3a2	tr|Q9EQR4|Q9EQR4_MOUSE VWFA domain-containing protein OS=Mus musculus (Mouse) OX=10090 GN=Clca3a2 PE=1 SV=1
63357	63357	63357	2761600	4298800	4577200	2.60226	-5.93611	Cldn8	sp|Q9Z260|CLD8_MOUSE Claudin-8 OS=Mus musculus (Mouse) OX=10090 GN=Cldn8 PE=1 SV=1
63357	63357	63357	16137000	16118000	17114000	6.0135	-8.02092	Cln5	sp|Q3UMW8|CLN5_MOUSE Ceroid-lipofuscinosis neuronal protein 5 homolog OS=Mus musculus (Mouse) OX=10090 GN=Cln5 PE=1 SV=1
39423000	192740000	151210000	386060000	399270000	334710000	2.103	-1.54673	Cluap1	sp|Q8R3P7|CLUA1_MOUSE Clusterin-associated protein 1 OS=Mus musculus (Mouse) OX=10090 GN=Cluap1 PE=1 SV=1
63357	38657000	80455000	117560000	104390000	136910000	1.47784	-1.59034	Cmpk2	sp|Q3U5Q7|CMPK2_MOUSE UMP-CMP kinase 2, mitochondrial OS=Mus musculus (Mouse) OX=10090 GN=Cmpk2 PE=1 SV=2
63357	63357	23199000	75735000	49164000	52306000	1.96674	-2.92543	Cnep1r1	sp|Q3UJ81|NEPR1_MOUSE Nuclear envelope phosphatase-regulatory subunit 1 OS=Mus musculus (Mouse) OX=10090 GN=Cnep1r1 PE=1 SV=1
63357	63357	63357	81327000	53851000	28509000	1.63255	-9.75019	Cntrob	sp|Q8CB62|CNTRB_MOUSE Centrobin OS=Mus musculus (Mouse) OX=10090 GN=Cntrob PE=2 SV=2
63357	63357	63357	19191000	12840000	21109000	2.67382	-8.12712	Col4a5	tr|Q63ZW6|Q63ZW6_MOUSE Collagen IV NC1 domain-containing protein OS=Mus musculus (Mouse) OX=10090 GN=Col4a5 PE=1 SV=1
63357	63357	63357	49018000	48893000	54119000	5.09858	-9.6436	Comtd1	sp|Q8BIG7|CMTD1_MOUSE Catechol O-methyltransferase domain-containing protein 1 OS=Mus musculus (Mouse) OX=10090 GN=Comtd1 PE=1 SV=1
63357	63357	63357	13532000	19841000	7814100	1.76858	-7.75951	Coq10a	tr|E9Q3H6|E9Q3H6_MOUSE Polyketide_cyc domain-containing protein OS=Mus musculus (Mouse) OX=10090 GN=Coq10a PE=1 SV=1
63357	63357	63357	19663000	21117000	18691000	5.01614	-8.2895	Coq4	sp|Q8BGB8|COQ4_MOUSE Ubiquinone biosynthesis protein COQ4 homolog, mitochondrial OS=Mus musculus (Mouse) OX=10090 GN=Coq4 PE=1 SV=1
63357	63357	9774500	25972000	31819000	26357000	2.56476	-3.08725	Coq7	sp|P97478|COQ7_MOUSE 5-demethoxyubiquinone hydroxylase, mitochondrial OS=Mus musculus (Mouse) OX=10090 GN=Coq7 PE=1 SV=3
63357	63357	19946000	43044000	36249000	31242000	1.80792	-2.4612	Cox15	sp|Q8BJ03|COX15_MOUSE Cytochrome c oxidase assembly protein COX15 homolog OS=Mus musculus (Mouse) OX=10090 GN=Cox15 PE=1 SV=1
12784000	63357	63357	18977000	14099000	19189000	1.34678	-2.01728	Cox7a2l	sp|Q61387|COX7R_MOUSE Cytochrome c oxidase subunit 7A-related protein, mitochondrial OS=Mus musculus (Mouse) OX=10090 GN=Cox7a2l PE=1 SV=1
63357	12238000	12659000	24530000	29579000	38445000	1.75118	-1.89066	Cracr2b	sp|Q80ZJ8|EFC4A_MOUSE EF-hand calcium-binding domain-containing protein 4A OS=Mus musculus (Mouse) OX=10090 GN=Cracr2b PE=2 SV=2
63357	23600000	23146000	45982000	44791000	44226000	1.70933	-1.52808	Creg1	sp|O88668|CREG1_MOUSE Protein CREG1 OS=Mus musculus (Mouse) OX=10090 GN=Creg1 PE=1 SV=1
63357	63357	63357	17937000	14426000	9500800	2.32337	-7.78302	Crlf1	sp|Q9JM58|CRLF1_MOUSE Cytokine receptor-like factor 1 OS=Mus musculus (Mouse) OX=10090 GN=Crlf1 PE=1 SV=1
63357	63357	63357	7694800	5856700	8044500	3.33495	-6.82808	Crtc3	sp|Q91X84|CRTC3_MOUSE CREB-regulated transcription coactivator 3 OS=Mus musculus (Mouse) OX=10090 GN=Crtc3 PE=1 SV=2
63357	63357	6687900	49122000	56049000	31568000	2.32648	-4.32665	Cryab	sp|P23927|CRYAB_MOUSE Alpha-crystallin B chain OS=Mus musculus (Mouse) OX=10090 GN=Cryab PE=1 SV=2
63357	2185900	63357	10927000	7139700	10939000	2.4479	-3.64874	Ctf1	sp|Q60753|CTF1_MOUSE Cardiotrophin-1 OS=Mus musculus (Mouse) OX=10090 GN=Ctf1 PE=2 SV=1
20471000	63357	63357	31696000	53057000	47398000	1.78668	-2.68163	Ctso	sp|Q8BM88|CATO_MOUSE Cathepsin O OS=Mus musculus (Mouse) OX=10090 GN=Ctso PE=2 SV=1
63357	63357	63357	14635000	15810000	12158000	3.71215	-7.80827	Ctu1	sp|Q99J10|CTU1_MOUSE Cytoplasmic tRNA 2-thiolation protein 1 OS=Mus musculus (Mouse) OX=10090 GN=Ctu1 PE=2 SV=1
63357	558060	63357	16110000	17538000	10701000	2.65173	-6.01713	Cxcl15	sp|Q9WVL7|CXL15_MOUSE C-X-C motif chemokine 15 OS=Mus musculus (Mouse) OX=10090 GN=Cxcl15 PE=1 SV=1
63357	63357	63357	6943200	8274100	7467700	4.37827	-6.89906	Cxcl16	sp|Q8BSU2|CXL16_MOUSE C-X-C motif chemokine 16 OS=Mus musculus (Mouse) OX=10090 GN=Cxcl16 PE=1 SV=2
63357	63357	9873500	14602000	14092000	13358000	1.50237	-2.07214	Cxcl5	sp|P50228|CXCL5_MOUSE C-X-C motif chemokine 5 OS=Mus musculus (Mouse) OX=10090 GN=Cxcl5 PE=1 SV=2
63357	63357	63357	68764000	59437000	51580000	3.56592	-9.88549	Cyb5d1	sp|Q5NCY3|CB5D1_MOUSE Cytochrome b5 domain-containing protein 1 OS=Mus musculus (Mouse) OX=10090 GN=Cyb5d1 PE=2 SV=1
63357	63357	63357	15863000	8430900	8075200	1.87216	-7.41194	Cyp2g1	tr|Q9WV19|Q9WV19_MOUSE Cytochrome P450, family 2, subfamily g, polypeptide 1 OS=Mus musculus (Mouse) OX=10090 GN=Cyp2g1 PE=2 SV=1
63357	63357	63357	18748000	9648800	16513000	2.25768	-7.88435	Cyp4a12a	sp|Q91WL5|CP4CA_MOUSE Cytochrome P450 4A12A OS=Mus musculus (Mouse) OX=10090 GN=Cyp4a12a PE=1 SV=2
74704000	58730000	110090000	319580000	318940000	354880000	3.69089	-2.02831	Cyp4b1	sp|Q64462|CP4B1_MOUSE Cytochrome P450 4B1 OS=Mus musculus (Mouse) OX=10090 GN=Cyp4b1 PE=1 SV=1
63357	63357	63357	7244700	3616000	2840900	1.53124	-6.17166	Cyp4f14	sp|Q9EP75|CP4FE_MOUSE Leukotriene-B4 omega-hydroxylase 3 OS=Mus musculus (Mouse) OX=10090 GN=Cyp4f14 PE=1 SV=1
3179700	9699600	63357	27196000	15854000	17644000	1.61152	-2.22942	D17h6s53e	sp|Q9Z1R4|CF047_MOUSE Uncharacterized protein C6orf47 homolog OS=Mus musculus (Mouse) OX=10090 GN=D17h6s53e PE=1 SV=1
63357	77319000	73860000	187120000	179280000	212490000	2.20296	-1.93643	D7h11orf16	sp|Q9JJR6|CK016_MOUSE Uncharacterized protein C11orf16 homolog OS=Mus musculus (Mouse) OX=10090 GN=D7h11orf16 PE=2 SV=2
63357	63357	63357	9647300	10881000	16067000	2.45545	-7.58898	Dalrd3	sp|Q6PJN8|DALD3_MOUSE DALR anticodon-binding domain-containing protein 3 OS=Mus musculus (Mouse) OX=10090 GN=Dalrd3 PE=2 SV=1
10706000	63357	63357	14301000	18944000	14519000	1.4795	-2.14053	Dapl1	sp|Q9D757|DAPL1_MOUSE Death-associated protein-like 1 OS=Mus musculus (Mouse) OX=10090 GN=Dapl1 PE=1 SV=1
63357	63357	63357	46100000	63045000	75611000	2.704	-9.92487	Daxx	sp|O35613|DAXX_MOUSE Death domain-associated protein 6 OS=Mus musculus (Mouse) OX=10090 GN=Daxx PE=1 SV=1
63357	63357	63357	12518000	8168300	14553000	2.46434	-7.5345	Ddo	sp|Q922Z0|OXDD_MOUSE D-aspartate oxidase OS=Mus musculus (Mouse) OX=10090 GN=Ddo PE=1 SV=1
63357	7994900	7697100	19097000	20384000	16397000	2.02924	-1.82644	Dhx37	tr|Q6NZL1|Q6NZL1_MOUSE DEAH (Asp-Glu-Ala-His) box polypeptide 37 OS=Mus musculus (Mouse) OX=10090 GN=Dhx37 PE=1 SV=1
63357	63357	63357	11606000	20075000	9778700	1.91082	-7.76903	Dipk2a	sp|Q3USZ8|DIK2A_MOUSE Divergent protein kinase domain 2A OS=Mus musculus (Mouse) OX=10090 GN=Dipk2a PE=1 SV=2
63357	63357	63357	11368000	11983000	12901000	4.95048	-7.57538	Diras2	sp|Q5PR73|DIRA2_MOUSE GTP-binding protein Di-Ras2 OS=Mus musculus (Mouse) OX=10090 GN=Diras2 PE=1 SV=1
63357	63357	63357	6233000	9866400	7527500	2.73828	-6.95775	Dirc2	sp|Q8BFQ6|DIRC2_MOUSE Solute carrier family 49 member 4 OS=Mus musculus (Mouse) OX=10090 GN=Slc49a4 PE=2 SV=1
300410000	233470000	275770000	1224200000	644080000	1004900000	1.80688	-1.82728	Dmbt1	sp|Q60997|DMBT1_MOUSE Deleted in malignant brain tumors 1 protein OS=Mus musculus (Mouse) OX=10090 GN=Dmbt1 PE=1 SV=2
63357	89447000	84520000	166940000	185290000	154160000	1.66073	-1.54091	Dnaaf1	sp|Q9D2H9|DAAF1_MOUSE Dynein assembly factor 1, axonemal OS=Mus musculus (Mouse) OX=10090 GN=Dnaaf1 PE=1 SV=1
29193000	56557000	78874000	157290000	146940000	171870000	2.52801	-1.53209	Dnaaf2	sp|Q8BPI1|KTU_MOUSE Protein kintoun OS=Mus musculus (Mouse) OX=10090 GN=Dnaaf2 PE=1 SV=2
84075000	231550000	146160000	503300000	494220000	475920000	2.82621	-1.6739	Dnah11	tr|E9Q7N9|E9Q7N9_MOUSE Dynein, axonemal, heavy chain 11 OS=Mus musculus (Mouse) OX=10090 GN=Dnah11 PE=1 SV=2
33939000	133490000	102120000	267170000	269150000	257790000	2.38645	-1.55879	Dnai1	sp|Q8C0M8|DNAI1_MOUSE Dynein intermediate chain 1, axonemal OS=Mus musculus (Mouse) OX=10090 GN=Dnai1 PE=1 SV=1
41120000	262760000	144310000	556960000	567840000	544470000	2.49432	-1.89703	Dnajb13	sp|Q80Y75|DJB13_MOUSE DnaJ homolog subfamily B member 13 OS=Mus musculus (Mouse) OX=10090 GN=Dnajb13 PE=1 SV=1
63357	63357	63357	7067800	6829000	5322700	3.50262	-6.65989	Dnmbp	sp|Q6TXD4|DNMBP_MOUSE Dynamin-binding protein OS=Mus musculus (Mouse) OX=10090 GN=Dnmbp PE=1 SV=2
40132000	107750000	90929000	245520000	245160000	246900000	2.9144	-1.62693	Dpcd	sp|Q8BPA8|DPCD_MOUSE Protein DPCD OS=Mus musculus (Mouse) OX=10090 GN=Dpcd PE=1 SV=1
9337900	117060000	61357000	202490000	176640000	194790000	1.79901	-1.612	Drc1	sp|Q3USS3|DRC1_MOUSE Dynein regulatory complex protein 1 OS=Mus musculus (Mouse) OX=10090 GN=Drc1 PE=1 SV=1
63357	15206000	19167000	36439000	29348000	33584000	1.60597	-1.52889	Drc7	sp|Q6V3W6|DRC7_MOUSE Dynein regulatory complex subunit 7 OS=Mus musculus (Mouse) OX=10090 GN=Drc7 PE=1 SV=4
63357	63357	63357	4921400	4399300	8965000	1.85667	-6.58803	Dtnbp1	sp|Q91WZ8|DTBP1_MOUSE Dysbindin OS=Mus musculus (Mouse) OX=10090 GN=Dtnbp1 PE=1 SV=1
63357	63357	63357	8015600	12936000	12351000	2.68511	-7.45295	Dxo	sp|O70348|DXO_MOUSE Decapping and exoribonuclease protein OS=Mus musculus (Mouse) OX=10090 GN=Dxo PE=1 SV=2
15919000	62335000	62388000	163360000	158670000	146270000	2.58831	-1.73541	Dydc2	tr|Q9D3X8|Q9D3X8_MOUSE DPY30 domain-containing 2 OS=Mus musculus (Mouse) OX=10090 GN=Dydc2 PE=1 SV=1
63357	8013700	7601700	16321000	15570000	16216000	1.85141	-1.61744	Dyx1c1	sp|Q8R368|DAAF4_MOUSE Dynein assembly factor 4, axonemal OS=Mus musculus (Mouse) OX=10090 GN=Dnaaf4 PE=1 SV=2
63357	11830000	63357	27778000	42297000	42372000	2.23566	-3.23335	E230008N13Rik	tr|J3QNE4|J3QNE4_MOUSE Coiled-coil domain-containing 180 OS=Mus musculus (Mouse) OX=10090 GN=Ccdc180 PE=4 SV=1
63357	63357	63357	21513000	19016000	26336000	3.30736	-8.45857	Echdc2	sp|Q3TLP5|ECHD2_MOUSE Enoyl-CoA hydratase domain-containing protein 2, mitochondrial OS=Mus musculus (Mouse) OX=10090 GN=Echdc2 PE=1 SV=2
63357	34901000	26495000	82548000	84383000	60133000	1.87115	-1.88539	Ectl2	tr|A0A140LIP2|A0A140LIP2_MOUSE DH domain-containing protein OS=Mus musculus (Mouse) OX=10090 GN=Ect2l PE=1 SV=1
63357	63357	9179000	12689000	11524000	14597000	1.44297	-2.06024	Edem2	sp|Q8BJT9|EDEM2_MOUSE ER degradation-enhancing alpha-mannosidase-like protein 2 OS=Mus musculus (Mouse) OX=10090 GN=Edem2 PE=1 SV=1
63357	63357	63357	8891200	7274400	8956700	3.95099	-7.04629	Eef2kmt	sp|Q3UZW7|EF2KT_MOUSE Protein-lysine N-methyltransferase EEF2KMT OS=Mus musculus (Mouse) OX=10090 GN=Eef2kmt PE=1 SV=1
63357	19227000	22126000	41079000	40913000	45714000	1.81109	-1.62455	Efcab1	sp|Q9D3N2|EFCB1_MOUSE EF-hand calcium-binding domain-containing protein 1 OS=Mus musculus (Mouse) OX=10090 GN=Efcab1 PE=2 SV=1
63357	26252000	25772000	49099000	58321000	51627000	1.76605	-1.61045	Efcab10	sp|Q9D581|EFC10_MOUSE EF-hand calcium-binding domain-containing protein 10 OS=Mus musculus (Mouse) OX=10090 GN=Efcab10 PE=1 SV=1
63357	5504800	63357	9617500	17042000	15022000	1.862	-2.88781	Efcab2	sp|Q9CQ46|DRC8_MOUSE Dynein regulatory complex protein 8 OS=Mus musculus (Mouse) OX=10090 GN=Efcab2 PE=1 SV=1
63357	63357	63357	14879000	7922700	9534900	2.15514	-7.41049	Efemp2	sp|Q9WVJ9|FBLN4_MOUSE EGF-containing fibulin-like extracellular matrix protein 2 OS=Mus musculus (Mouse) OX=10090 GN=Efemp2 PE=1 SV=1
60758000	338580000	242420000	608470000	738150000	570490000	1.94207	-1.57883	Efhc1	sp|Q9D9T8|EFHC1_MOUSE EF-hand domain-containing protein 1 OS=Mus musculus (Mouse) OX=10090 GN=Efhc1 PE=1 SV=1
63357	63357	63357	11691000	12217000	27015000	1.55094	-8.06564	Egln1	sp|Q91YE3|EGLN1_MOUSE Egl nine homolog 1 OS=Mus musculus (Mouse) OX=10090 GN=Egln1 PE=1 SV=2
63357	63357	63357	9950500	9229300	10113000	5.43587	-7.26786	Ehhadh	sp|Q9DBM2|ECHP_MOUSE Peroxisomal bifunctional enzyme OS=Mus musculus (Mouse) OX=10090 GN=Ehhadh PE=1 SV=4
63357	4130800	63357	4633000	7179800	5866300	1.35566	-2.05396	Eif4ebp2	sp|P70445|4EBP2_MOUSE Eukaryotic translation initiation factor 4E-binding protein 2 OS=Mus musculus (Mouse) OX=10090 GN=Eif4ebp2 PE=1 SV=1
63357	63357	63357	16560000	17043000	11678000	3.03089	-7.89622	Elp5	sp|Q99L85|ELP5_MOUSE Elongator complex protein 5 OS=Mus musculus (Mouse) OX=10090 GN=Elp5 PE=2 SV=1
26473000	134920000	111410000	263610000	285860000	286380000	2.28925	-1.61538	Enkur	sp|Q6SP97|ENKUR_MOUSE Enkurin OS=Mus musculus (Mouse) OX=10090 GN=Enkur PE=1 SV=1
63357	63357	63357	13028000	4601700	10432000	1.69217	-7.20592	Eral1	sp|Q9CZU4|ERAL1_MOUSE GTPase Era, mitochondrial OS=Mus musculus (Mouse) OX=10090 GN=Eral1 PE=2 SV=1
63357	23473000	16892000	60527000	50534000	101900000	1.54161	-2.39715	F5	sp|O88783|FA5_MOUSE Coagulation factor V OS=Mus musculus (Mouse) OX=10090 GN=F5 PE=1 SV=1
52483000	85981000	75858000	216220000	238720000	209610000	3.45828	-1.6326	Faah	sp|O08914|FAAH1_MOUSE Fatty-acid amide hydrolase 1 OS=Mus musculus (Mouse) OX=10090 GN=Faah PE=1 SV=1
63357	4452100	63357	21409000	16242000	18120000	2.90201	-3.60647	Fabp2	sp|P55050|FABPI_MOUSE Fatty acid-binding protein, intestinal OS=Mus musculus (Mouse) OX=10090 GN=Fabp2 PE=1 SV=2
63357	12751000	63357	29500000	22606000	23669000	1.9396	-2.55685	Fads1	sp|Q920L1|FADS1_MOUSE Acyl-CoA (8-3)-desaturase OS=Mus musculus (Mouse) OX=10090 GN=Fads1 PE=1 SV=1
63357	24837000	21271000	55207000	46795000	38864000	1.59781	-1.60925	Fads3	sp|Q9JJE7|FADS3_MOUSE Fatty acid desaturase 3 OS=Mus musculus (Mouse) OX=10090 GN=Fads3 PE=1 SV=2
1957600	63357	63357	18673000	18101000	18718000	4.94458	-4.73464	Fam104a	tr|A2A6P4|A2A6P4_MOUSE Family with sequence similarity 104, member A OS=Mus musculus (Mouse) OX=10090 GN=Fam104a PE=1 SV=1
61484000	286950000	291860000	698820000	565940000	602420000	2.05412	-1.54405	Fam154b	sp|Q8BQB6|SAXO2_MOUSE Stabilizer of axonemal microtubules 2 OS=Mus musculus (Mouse) OX=10090 GN=Saxo2 PE=2 SV=2
63357	63357	63357	18238000	17904000	9131400	2.13789	-7.89598	Fam161a	sp|Q8QZV6|F161A_MOUSE Protein FAM161A OS=Mus musculus (Mouse) OX=10090 GN=Fam161a PE=1 SV=1
63357	63357	63357	7654200	11232000	10160000	3.08729	-7.25567	Fam166c	sp|Q9DAS2|F166C_MOUSE Protein FAM166C OS=Mus musculus (Mouse) OX=10090 GN=Fam166c PE=2 SV=1
63357	63357	63357	25620000	27074000	48060000	2.00641	-9.05008	Fam183b	sp|Q5NC57|F183B_MOUSE Protein FAM183B OS=Mus musculus (Mouse) OX=10090 GN=Fam183b PE=1 SV=2
63357	63357	63357	10812000	12170000	8650600	3.28815	-7.37873	Fam216b	sp|Q8CC14|F216B_MOUSE Protein FAM216B OS=Mus musculus (Mouse) OX=10090 GN=Fam216b PE=2 SV=1
2381000	63357	4129600	12217000	16253000	18990000	2.39606	-2.85188	Fam63b	sp|Q6PDI6|MINY2_MOUSE Ubiquitin carboxyl-terminal hydrolase MINDY-2 OS=Mus musculus (Mouse) OX=10090 GN=Mindy2 PE=1 SV=1
63357	63357	63357	28516000	40602000	27420000	2.79464	-8.98841	Fastkd2	sp|Q922E6|FAKD2_MOUSE FAST kinase domain-containing protein 2, mitochondrial OS=Mus musculus (Mouse) OX=10090 GN=Fastkd2 PE=2 SV=2
63357	10346000	14948000	30225000	18245000	28013000	1.38607	-1.59273	Fbxl8	sp|Q8CIG9|FBXL8_MOUSE F-box/LRR-repeat protein 8 OS=Mus musculus (Mouse) OX=10090 GN=Fbxl8 PE=1 SV=1
63357	63357	63357	45035000	50778000	64714000	3.10089	-9.72206	Fbxo16	sp|Q9QZM9|FBX16_MOUSE F-box only protein 16 OS=Mus musculus (Mouse) OX=10090 GN=Fbxo16 PE=2 SV=1
63357	63357	43322000	68844000	61601000	58474000	1.51937	-2.12038	Fbxo2	sp|Q80UW2|FBX2_MOUSE F-box only protein 2 OS=Mus musculus (Mouse) OX=10090 GN=Fbxo2 PE=1 SV=1
63357	63357	63357	26371000	20114000	15101000	2.48318	-8.33992	Fbxo36	sp|Q9CQ24|FBX36_MOUSE F-box only protein 36 OS=Mus musculus (Mouse) OX=10090 GN=Fbxo36 PE=1 SV=1
63357	63357	63357	14392000	16606000	22287000	2.77786	-8.13105	Fgf1	sp|P61148|FGF1_MOUSE Fibroblast growth factor 1 OS=Mus musculus (Mouse) OX=10090 GN=Fgf1 PE=1 SV=1
63357	63357	63357	52004000	66553000	52560000	3.55423	-9.81423	Fhl2	sp|O70433|FHL2_MOUSE Four and a half LIM domains protein 2 OS=Mus musculus (Mouse) OX=10090 GN=Fhl2 PE=1 SV=1
63357	63357	63357	36828000	39039000	31113000	3.94745	-9.13659	Fig4	sp|Q91WF7|FIG4_MOUSE Polyphosphoinositide phosphatase OS=Mus musculus (Mouse) OX=10090 GN=Fig4 PE=1 SV=1
3553300	6824300	63357	16358000	8957800	12472000	1.46172	-1.85567	Flvcr1	sp|B2RXV4|FLVC1_MOUSE Feline leukemia virus subgroup C receptor-related protein 1 OS=Mus musculus (Mouse) OX=10090 GN=Flvcr1 PE=2 SV=1
482700000	1328800000	1352000000	3366800000	3243300000	3190700000	2.79594	-1.63138	Fmo3	sp|P97501|FMO3_MOUSE Dimethylaniline monooxygenase [N-oxide-forming] 3 OS=Mus musculus (Mouse) OX=10090 GN=Fmo3 PE=1 SV=1
63357	63357	63357	72019000	57852000	64434000	4.0289	-9.99757	Fmo6	tr|J3QMN6|J3QMN6_MOUSE Dimethylaniline monooxygenase [N-oxide-forming] OS=Mus musculus (Mouse) OX=10090 GN=Fmo6 PE=1 SV=1
63357	4827900	63357	9354400	11459000	21690000	1.41237	-3.10073	Fndc7	sp|A2AED3|FNDC7_MOUSE Fibronectin type III domain-containing protein 7 OS=Mus musculus (Mouse) OX=10090 GN=Fndc7 PE=2 SV=1
63357	12664000	63357	31987000	35396000	34189000	2.6251	-2.98933	Fopnl	sp|Q9CZS3|FOPNL_MOUSE LisH domain-containing protein FOPNL OS=Mus musculus (Mouse) OX=10090 GN=Fopnl PE=1 SV=1
63357	63357	5977300	16656000	9921600	8367900	1.39319	-2.51728	Foxa1	sp|P35582|FOXA1_MOUSE Hepatocyte nuclear factor 3-alpha OS=Mus musculus (Mouse) OX=10090 GN=Foxa1 PE=1 SV=2
63357	63357	10295000	22289000	17836000	15566000	1.72969	-2.41785	Foxj1	sp|Q61660|FOXJ1_MOUSE Forkhead box protein J1 OS=Mus musculus (Mouse) OX=10090 GN=Foxj1 PE=1 SV=2
12352000	63357	63357	24709000	33520000	14833000	1.39016	-2.54965	Fpgs	sp|P48760|FOLC_MOUSE Folylpolyglutamate synthase, mitochondrial OS=Mus musculus (Mouse) OX=10090 GN=Fpgs PE=1 SV=3
72140000	119670000	86425000	299310000	309730000	359760000	3.22453	-1.79989	Fuca1	sp|Q99LJ1|FUCO_MOUSE Tissue alpha-L-fucosidase OS=Mus musculus (Mouse) OX=10090 GN=Fuca1 PE=1 SV=1
14200000	76901000	64537000	131090000	202150000	180750000	1.8618	-1.72355	Fuca2	sp|Q99KR8|FUCO2_MOUSE Plasma alpha-L-fucosidase OS=Mus musculus (Mouse) OX=10090 GN=Fuca2 PE=1 SV=1
63357	63357	63357	24968000	27025000	28864000	4.74018	-8.73269	Fundc1	sp|Q9DB70|FUND1_MOUSE FUN14 domain-containing protein 1 OS=Mus musculus (Mouse) OX=10090 GN=Fundc1 PE=1 SV=1
63357	63357	63357	4607400	6198800	3392500	2.34252	-6.22308	Fuz	sp|Q3UYI6|FUZZY_MOUSE Protein fuzzy homolog OS=Mus musculus (Mouse) OX=10090 GN=Fuz PE=1 SV=2
63357	63357	63357	15191000	52985000	48364000	1.50682	-9.26007	G6pc3	sp|Q6NSQ9|G6PC3_MOUSE Glucose-6-phosphatase 3 OS=Mus musculus (Mouse) OX=10090 GN=G6pc3 PE=1 SV=1
63357	47610000	52386000	111140000	206640000	232080000	1.68459	-2.45821	Gas2l2	sp|Q5SSG4|GA2L2_MOUSE GAS2-like protein 2 OS=Mus musculus (Mouse) OX=10090 GN=Gas2l2 PE=1 SV=1
6235600	73022000	75902000	191850000	133260000	200390000	1.7844	-1.75994	Gas8	sp|Q60779|DRC4_MOUSE Dynein regulatory complex subunit 4 OS=Mus musculus (Mouse) OX=10090 GN=Gas8 PE=1 SV=2
63357	12809000	17926000	37228000	27512000	34649000	1.71014	-1.69023	Gatb	sp|Q99JT1|GATB_MOUSE Glutamyl-tRNA(Gln) amidotransferase subunit B, mitochondrial OS=Mus musculus (Mouse) OX=10090 GN=Gatb PE=1 SV=1
2770700	63357	63357	7611600	6683500	5521900	2.18371	-2.7739	Gca	sp|Q8VC88|GRAN_MOUSE Grancalcin OS=Mus musculus (Mouse) OX=10090 GN=Gca PE=1 SV=1
63357	63357	63357	6040900	10117000	8727800	2.63117	-7.03263	Gemin7	sp|Q9CWY4|GEMI7_MOUSE Gem-associated protein 7 OS=Mus musculus (Mouse) OX=10090 GN=Gemin7 PE=2 SV=1
63357	63357	63357	25663000	11863000	37797000	1.54127	-8.63041	Ghdc	sp|Q99J23|GHDC_MOUSE GH3 domain-containing protein OS=Mus musculus (Mouse) OX=10090 GN=Ghdc PE=2 SV=2
63357	63357	63357	19662000	35664000	47463000	1.87916	-9.07893	Glb1l	sp|Q8VC60|GLB1L_MOUSE Beta-galactosidase-1-like protein OS=Mus musculus (Mouse) OX=10090 GN=Glb1l PE=1 SV=1
63357	63357	63357	18538000	12350000	30766000	1.71386	-8.34151	Gle1	sp|Q8R322|GLE1_MOUSE Nucleoporin GLE1 OS=Mus musculus (Mouse) OX=10090 GN=Gle1 PE=1 SV=2
63357	63357	63357	12950000	18715000	4619500	1.37303	-7.57667	Glrx2	sp|Q923X4|GLRX2_MOUSE Glutaredoxin-2, mitochondrial OS=Mus musculus (Mouse) OX=10090 GN=Glrx2 PE=1 SV=1
63357	7801900	63357	13374000	23528000	24009000	1.82335	-2.94156	Glt8d1	sp|Q6NSU3|GL8D1_MOUSE Glycosyltransferase 8 domain-containing protein 1 OS=Mus musculus (Mouse) OX=10090 GN=Glt8d1 PE=1 SV=1
37825000	160990000	270110000	762170000	789860000	653850000	2.73631	-2.23393	Gm12695	sp|A2AGB2|CA087_MOUSE Uncharacterized protein C1orf87 homolog OS=Mus musculus (Mouse) OX=10090 GN=Gm12695 PE=4 SV=1
63357	63357	63357	7827800	18526000	8800300	1.56909	-7.53101	Gnb3	sp|Q61011|GBB3_MOUSE Guanine nucleotide-binding protein G(I)/G(S)/G(T) subunit beta-3 OS=Mus musculus (Mouse) OX=10090 GN=Gnb3 PE=1 SV=2
92840000	244820000	226110000	601100000	767180000	748540000	2.7244	-1.90872	Gns	sp|Q8BFR4|GNS_MOUSE N-acetylglucosamine-6-sulfatase OS=Mus musculus (Mouse) OX=10090 GN=Gns PE=1 SV=1
63357	87168000	67026000	130240000	170220000	137740000	1.50689	-1.50625	Gpnmb	sp|Q99P91|GPNMB_MOUSE Transmembrane glycoprotein NMB OS=Mus musculus (Mouse) OX=10090 GN=Gpnmb PE=1 SV=2
63357	63357	2763700	11592000	7735700	7405000	2.09868	-3.20926	Gpr89a	sp|Q8BS95|GPHR_MOUSE Golgi pH regulator OS=Mus musculus (Mouse) OX=10090 GN=Gpr89a PE=1 SV=2
63357	63357	41264000	64906000	77217000	52132000	1.51647	-2.23057	Gstm3	sp|P19639|GSTM3_MOUSE Glutathione S-transferase Mu 3 OS=Mus musculus (Mouse) OX=10090 GN=Gstm3 PE=1 SV=2
63357	63357	63357	34358000	43621000	41770000	3.83097	-9.29926	Gtf2a2	sp|Q80ZM7|T2AG_MOUSE Transcription initiation factor IIA subunit 2 OS=Mus musculus (Mouse) OX=10090 GN=Gtf2a2 PE=1 SV=2
63357	5847300	63357	12934000	18650000	13353000	2.08637	-2.91113	Gtf2e2	sp|Q9D902|T2EB_MOUSE General transcription factor IIE subunit 2 OS=Mus musculus (Mouse) OX=10090 GN=Gtf2e2 PE=1 SV=2
63357	63357	63357	5222500	6094000	4024900	2.96301	-6.33475	Gtf2h3	sp|Q8VD76|TF2H3_MOUSE General transcription factor IIH subunit 3 OS=Mus musculus (Mouse) OX=10090 GN=Gtf2h3 PE=1 SV=1
63357	9205700	12923000	16435000	22497000	25952000	1.40334	-1.54782	H2-Q7;H2-Q9	sp|P14429|HA17_MOUSE H-2 class I histocompatibility antigen, Q7 alpha chain OS=Mus musculus (Mouse) OX=10090 GN=H2-Q7 PE=1 SV=1;sp|P14431|HA19_MOUSE H-2 class I histocompatibility antigen, Q9 alpha chain OS=Mus musculus (Mouse) OX=10090 GN=H2-Q9 PE=3 SV=1
63357	63357	7679000	22073000	23437000	16517000	2.26447	-2.99029	Hacl1	sp|Q9QXE0|HACL1_MOUSE 2-hydroxyacyl-CoA lyase 1 OS=Mus musculus (Mouse) OX=10090 GN=Hacl1 PE=1 SV=2
63357	63357	63357	24341000	33434000	15618000	2.04529	-8.59296	Haghl	sp|Q9DB32|HAGHL_MOUSE Hydroxyacylglutathione hydrolase-like protein OS=Mus musculus (Mouse) OX=10090 GN=Haghl PE=1 SV=1
63357	63357	63357	19951000	16178000	9376800	2.08896	-7.90337	Hax1	sp|O35387|HAX1_MOUSE HCLS1-associated protein X-1 OS=Mus musculus (Mouse) OX=10090 GN=Hax1 PE=1 SV=1
63357	63357	9511800	18820000	15307000	11660000	1.48218	-2.24806	Hccs	sp|P53702|CCHL_MOUSE Cytochrome c-type heme lyase OS=Mus musculus (Mouse) OX=10090 GN=Hccs PE=1 SV=2
63357	63357	63357	4932400	16059000	15745000	1.53626	-7.59453	Hdac10	sp|Q6P3E7|HDA10_MOUSE Polyamine deacetylase HDAC10 OS=Mus musculus (Mouse) OX=10090 GN=Hdac10 PE=2 SV=2
63357	63357	63357	17328000	15349000	11322000	2.93186	-7.85479	Hdac7	sp|Q8C2B3|HDAC7_MOUSE Histone deacetylase 7 OS=Mus musculus (Mouse) OX=10090 GN=Hdac7 PE=1 SV=2
63357	63357	63357	15022000	12975000	17189000	3.60422	-7.89319	Heatr3	sp|Q8BQM4|HEAT3_MOUSE HEAT repeat-containing protein 3 OS=Mus musculus (Mouse) OX=10090 GN=Heatr3 PE=1 SV=1
63357	63357	63357	27429000	28456000	29827000	5.67642	-8.81681	Hgsnat	sp|Q3UDW8|HGNAT_MOUSE Heparan-alpha-glucosaminide N-acetyltransferase OS=Mus musculus (Mouse) OX=10090 GN=Hgsnat PE=1 SV=2
63357	63357	63357	46764000	43641000	38944000	4.33977	-9.41051	Hmox1	sp|P14901|HMOX1_MOUSE Heme oxygenase 1 OS=Mus musculus (Mouse) OX=10090 GN=Hmox1 PE=1 SV=1
63357	63357	10914000	17006000	11184000	19119000	1.30919	-2.09928	Hpse	sp|Q6YGZ1|HPSE_MOUSE Heparanase OS=Mus musculus (Mouse) OX=10090 GN=Hpse PE=1 SV=3
63357	76424000	74722000	209760000	178170000	219830000	2.24765	-2.00695	Hspb11	sp|Q9D6H2|IFT25_MOUSE Intraflagellar transport protein 25 homolog OS=Mus musculus (Mouse) OX=10090 GN=Hspb11 PE=1 SV=2
63357	63357	63357	9002900	6998800	7258900	3.58963	-6.93521	Hspbap1	sp|Q8BK58|HBAP1_MOUSE HSPB1-associated protein 1 OS=Mus musculus (Mouse) OX=10090 GN=Hspbap1 PE=1 SV=2
63357	63357	21399000	32539000	51019000	66120000	1.62309	-2.79773	Idua	sp|P48441|IDUA_MOUSE Alpha-L-iduronidase OS=Mus musculus (Mouse) OX=10090 GN=Idua PE=1 SV=2
31238000	86422000	98823000	235350000	241760000	256630000	2.86631	-1.76102	Ift140	sp|E9PY46|IF140_MOUSE Intraflagellar transport protein 140 homolog OS=Mus musculus (Mouse) OX=10090 GN=Ift140 PE=1 SV=1
122020000	515890000	608060000	1057700000	1719700000	1305700000	1.74747	-1.7124	Ift172	sp|Q6VH22|IF172_MOUSE Intraflagellar transport protein 172 homolog OS=Mus musculus (Mouse) OX=10090 GN=Ift172 PE=1 SV=1
36130000	139660000	101770000	313710000	255620000	224780000	1.90229	-1.51654	Ift27	sp|Q9D0P8|IFT27_MOUSE Intraflagellar transport protein 27 homolog OS=Mus musculus (Mouse) OX=10090 GN=Ift27 PE=1 SV=1
25101000	108140000	93875000	217010000	240460000	193630000	2.08719	-1.51945	Ift57	sp|Q8BXG3|IFT57_MOUSE Intraflagellar transport protein 57 homolog OS=Mus musculus (Mouse) OX=10090 GN=Ift57 PE=1 SV=1
253640000	457740000	419270000	989420000	981870000	1468600000	1.95096	-1.60521	Ift74	sp|Q8BKE9|IFT74_MOUSE Intraflagellar transport protein 74 homolog OS=Mus musculus (Mouse) OX=10090 GN=Ift74 PE=1 SV=2
61758000	312880000	197920000	750700000	708300000	596600000	2.34461	-1.84407	Ift80	sp|Q8K057|IFT80_MOUSE Intraflagellar transport protein 80 homolog OS=Mus musculus (Mouse) OX=10090 GN=Ift80 PE=1 SV=1
150620000	499790000	420420000	1379100000	1232900000	1103100000	2.57802	-1.79467	Ift81	sp|O35594|IFT81_MOUSE Intraflagellar transport protein 81 homolog OS=Mus musculus (Mouse) OX=10090 GN=Ift81 PE=1 SV=4
47358000	45740000	47741000	142480000	170580000	105590000	2.10025	-1.5717	Igf2bp3	sp|Q9CPN8|IF2B3_MOUSE Insulin-like growth factor 2 mRNA-binding protein 3 OS=Mus musculus (Mouse) OX=10090 GN=Igf2bp3 PE=1 SV=1
63357	63357	63357	5346700	6384500	7278100	3.44761	-6.64402	Il4i1	sp|O09046|OXLA_MOUSE L-amino-acid oxidase OS=Mus musculus (Mouse) OX=10090 GN=Il4i1 PE=1 SV=1
8392800	71538000	63357	92300000	83629000	128550000	1.32531	-1.92838	Inf2	sp|Q0GNC1|INF2_MOUSE Inverted formin-2 OS=Mus musculus (Mouse) OX=10090 GN=Inf2 PE=1 SV=1
63357	63357	63357	20065000	20368000	21242000	6.27895	-8.342	Ints10	sp|Q8K2A7|INT10_MOUSE Integrator complex subunit 10 OS=Mus musculus (Mouse) OX=10090 GN=Ints10 PE=1 SV=3
63357	63357	63357	34624000	46267000	27359000	2.54923	-9.15361	Intu	sp|Q059U7|INTU_MOUSE Protein inturned OS=Mus musculus (Mouse) OX=10090 GN=Intu PE=1 SV=1
63357	30238000	22725000	61752000	51277000	73282000	1.79668	-1.81293	Iqcb1	sp|Q8BP00|IQCB1_MOUSE IQ calmodulin-binding motif-containing protein 1 OS=Mus musculus (Mouse) OX=10090 GN=Iqcb1 PE=1 SV=2
16714000	25500000	29088000	76727000	69519000	70879000	3.46128	-1.60651	Iqce	sp|Q6PCQ0|IQCE_MOUSE IQ domain-containing protein E OS=Mus musculus (Mouse) OX=10090 GN=Iqce PE=1 SV=1
63357	63357	63357	5699400	10377000	8180500	2.39421	-6.99571	Iqck	tr|D3YYL3|D3YYL3_MOUSE IQ motif-containing K OS=Mus musculus (Mouse) OX=10090 GN=Iqck PE=1 SV=1
63357	38581000	21229000	62984000	83259000	77622000	1.90294	-1.90264	Iqub	sp|Q8CDK3|IQUB_MOUSE IQ and ubiquitin-like domain-containing protein OS=Mus musculus (Mouse) OX=10090 GN=Iqub PE=1 SV=2
63357	63357	63357	16845000	15990000	14251000	4.47427	-7.95262	Isca2	sp|Q9DCB8|ISCA2_MOUSE Iron-sulfur cluster assembly 2 homolog, mitochondrial OS=Mus musculus (Mouse) OX=10090 GN=Isca2 PE=1 SV=2
63357	63357	63357	23997000	27183000	19635000	3.37383	-8.54137	Itm2c	sp|Q91VK4|ITM2C_MOUSE Integral membrane protein 2C OS=Mus musculus (Mouse) OX=10090 GN=Itm2c PE=1 SV=2
7989300	19963000	63357	47617000	73148000	49668000	2.04228	-2.6049	JHY	sp|E9Q793|JHY_MOUSE Jhy protein OS=Mus musculus (Mouse) OX=10090 GN=Jhy PE=1 SV=1
63357	63357	4842100	11162000	11447000	8081700	1.95182	-2.62683	Jmjd8	sp|Q3TA59|JMJD8_MOUSE JmjC domain-containing protein 8 OS=Mus musculus (Mouse) OX=10090 GN=Jmjd8 PE=2 SV=3
63357	63357	8016400	26856000	27415000	25915000	3.06213	-3.2997	Katnal2	sp|Q9D3R6|KATL2_MOUSE Katanin p60 ATPase-containing subunit A-like 2 OS=Mus musculus (Mouse) OX=10090 GN=Katnal2 PE=2 SV=2
44677000	209470000	202850000	425190000	502460000	478900000	2.2474	-1.6219	Kcnrg	sp|Q2TUM3|KCNRG_MOUSE Potassium channel regulatory protein OS=Mus musculus (Mouse) OX=10090 GN=Kcnrg PE=2 SV=1
63357	4637900	63357	15947000	13667000	17978000	2.71672	-3.32029	Kiaa0753	sp|Q6A000|MOONR_MOUSE Protein moonraker OS=Mus musculus (Mouse) OX=10090 GN=Kiaa0753 PE=1 SV=2
63357	4525900	37782000	44432000	58336000	75593000	1.41426	-2.07364	Kiaa1324	sp|A2AFS3|K1324_MOUSE UPF0577 protein KIAA1324 OS=Mus musculus (Mouse) OX=10090 GN=Kiaa1324 PE=1 SV=1
39680000	63357	63357	114260000	88156000	114320000	2.3666	-2.9922	Kiaa1549	sp|Q68FD9|K1549_MOUSE UPF0606 protein KIAA1549 OS=Mus musculus (Mouse) OX=10090 GN=Kiaa1549 PE=1 SV=3
63357	63357	63357	5852200	6899300	4312400	2.76899	-6.48827	Kiaa1841	sp|Q68FF0|K1841_MOUSE Uncharacterized protein KIAA1841 OS=Mus musculus (Mouse) OX=10090 GN=Kiaa1841 PE=1 SV=2
63357	63357	10501000	81027000	83182000	72125000	3.99523	-4.47492	Kif6	tr|E9PX57|E9PX57_MOUSE Kinesin-like protein OS=Mus musculus (Mouse) OX=10090 GN=Kif6 PE=1 SV=1
63357	63357	63357	20895000	17739000	19204000	4.52332	-8.24934	Krt84	sp|Q99M73|KRT84_MOUSE Keratin, type II cuticular Hb4 OS=Mus musculus (Mouse) OX=10090 GN=Krt84 PE=2 SV=2
63357	63357	63357	28970000	61378000	43827000	2.05304	-9.46336	Lamtor4	sp|Q8CF66|LTOR4_MOUSE Ragulator complex protein LAMTOR4 OS=Mus musculus (Mouse) OX=10090 GN=Lamtor4 PE=1 SV=2
63357	63357	1052600	3141900	6597000	4242700	1.78667	-3.56751	Layn	sp|Q8C351|LAYN_MOUSE Layilin OS=Mus musculus (Mouse) OX=10090 GN=Layn PE=1 SV=4
63357	13510000	12683000	25474000	21317000	30753000	1.53529	-1.56235	Lca5l	sp|Q8C0X0|LCA5L_MOUSE Lebercilin-like protein OS=Mus musculus (Mouse) OX=10090 GN=Lca5l PE=2 SV=2
63357	63357	63357	37275000	17337000	24897000	1.98212	-8.70844	Lfng	sp|O09010|LFNG_MOUSE Beta-1,3-N-acetylglucosaminyltransferase lunatic fringe OS=Mus musculus (Mouse) OX=10090 GN=Lfng PE=1 SV=1
63357	63357	63357	11692000	13389000	11994000	4.71311	-7.60776	Lgals4	sp|Q8K419|LEG4_MOUSE Galectin-4 OS=Mus musculus (Mouse) OX=10090 GN=Lgals4 PE=1 SV=2
8145900	63357	7010000	24974000	11839000	17481000	1.33448	-1.83489	Lig1	sp|P37913|DNLI1_MOUSE DNA ligase 1 OS=Mus musculus (Mouse) OX=10090 GN=Lig1 PE=1 SV=2
29902000	21796000	37683000	85001000	116820000	87254000	2.39142	-1.6934	Lims1	sp|Q99JW4|LIMS1_MOUSE LIM and senescent cell antigen-like-containing domain protein 1 OS=Mus musculus (Mouse) OX=10090 GN=Lims1 PE=1 SV=3
63357	63357	63357	7462500	10067000	5686300	2.41974	-6.93242	Lrch3	sp|Q8BVU0|LRCH3_MOUSE DISP complex protein LRCH3 OS=Mus musculus (Mouse) OX=10090 GN=Lrch3 PE=1 SV=3
63357	63357	8858700	19476000	21364000	27476000	2.18817	-2.92657	Lrrc18	sp|Q9CQ07|LRC18_MOUSE Leucine-rich repeat-containing protein 18 OS=Mus musculus (Mouse) OX=10090 GN=Lrrc18 PE=2 SV=1
13676000	107970000	120160000	295710000	325760000	246000000	2.15562	-1.84296	Lrrc23	sp|O35125|LRC23_MOUSE Leucine-rich repeat-containing protein 23 OS=Mus musculus (Mouse) OX=10090 GN=Lrrc23 PE=1 SV=1
63357	63357	7388000	11732000	15428000	11307000	1.6905	-2.35583	Lrrc57	sp|Q9D1G5|LRC57_MOUSE Leucine-rich repeat-containing protein 57 OS=Mus musculus (Mouse) OX=10090 GN=Lrrc57 PE=1 SV=1
63357	63357	19108000	46343000	48802000	40523000	2.33022	-2.8183	Lrrc58	sp|Q3UGP9|LRC58_MOUSE Leucine-rich repeat-containing protein 58 OS=Mus musculus (Mouse) OX=10090 GN=Lrrc58 PE=2 SV=1
15775000	63357	15002000	46142000	45910000	39547000	2.42422	-2.09326	Lrrc6	sp|O88978|TILB_MOUSE Protein tilB homolog OS=Mus musculus (Mouse) OX=10090 GN=Lrrc6 PE=1 SV=1
63357	18837000	33420000	90972000	92963000	99771000	2.81536	-2.43895	Lrrc74b	sp|Q14BP6|LR74B_MOUSE Leucine-rich repeat-containing protein 74B OS=Mus musculus (Mouse) OX=10090 GN=Lrrc74b PE=2 SV=1
17784000	23505000	20617000	66112000	69349000	53997000	2.99409	-1.61373	Lsm14b	sp|Q8CGC4|LS14B_MOUSE Protein LSM14 homolog B OS=Mus musculus (Mouse) OX=10090 GN=Lsm14b PE=1 SV=3
63357	63357	63357	159360000	146290000	204310000	3.19397	-11.3896	Ly6c1	sp|P0CW02|LY6C1_MOUSE Lymphocyte antigen 6C1 OS=Mus musculus (Mouse) OX=10090 GN=Ly6c1 PE=2 SV=1
63357	8576300	63357	10826000	13080000	19011000	1.41856	-2.30196	Lyrm2	sp|Q8R033|LYRM2_MOUSE LYR motif-containing protein 2 OS=Mus musculus (Mouse) OX=10090 GN=Lyrm2 PE=3 SV=1
6179500	29733000	63357	45846000	53458000	36948000	1.5111	-1.92118	Mak	sp|Q04859|MAK_MOUSE Serine/threonine-protein kinase MAK OS=Mus musculus (Mouse) OX=10090 GN=Mak PE=1 SV=2
63357	63357	10962000	20465000	13018000	15206000	1.37599	-2.1345	Map3k2	sp|Q61083|M3K2_MOUSE Mitogen-activated protein kinase kinase kinase 2 OS=Mus musculus (Mouse) OX=10090 GN=Map3k2 PE=1 SV=2
63357	63357	63357	54718000	35340000	75391000	2.05154	-9.76563	Map3k4	sp|O08648|M3K4_MOUSE Mitogen-activated protein kinase kinase kinase 4 OS=Mus musculus (Mouse) OX=10090 GN=Map3k4 PE=1 SV=2
12549000	10690000	26317000	55285000	47612000	52338000	2.54147	-1.64732	Map3k5	sp|O35099|M3K5_MOUSE Mitogen-activated protein kinase kinase kinase 5 OS=Mus musculus (Mouse) OX=10090 GN=Map3k5 PE=1 SV=3
63357	63357	63357	12932000	5202900	18169000	1.48135	-7.57744	Map4k1	sp|P70218|M4K1_MOUSE Mitogen-activated protein kinase kinase kinase kinase 1 OS=Mus musculus (Mouse) OX=10090 GN=Map4k1 PE=1 SV=1
63357	63357	3053200	64568000	46178000	47838000	3.01649	-5.64012	Mapk15	sp|Q80Y86|MK15_MOUSE Mitogen-activated protein kinase 15 OS=Mus musculus (Mouse) OX=10090 GN=Mapk15 PE=1 SV=1
63357	25396000	25878000	49712000	61763000	46338000	1.66171	-1.62014	Mau2	sp|Q9D2X5|SCC4_MOUSE MAU2 chromatid cohesion factor homolog OS=Mus musculus (Mouse) OX=10090 GN=Mau2 PE=1 SV=3
63357	63357	8593700	10826000	15307000	10659000	1.35591	-2.07692	Mbd1	sp|Q9Z2E2|MBD1_MOUSE Methyl-CpG-binding domain protein 1 OS=Mus musculus (Mouse) OX=10090 GN=Mbd1 PE=1 SV=2
63357	4622800	63357	11089000	7503700	6064100	1.44679	-2.37613	Med23	sp|Q80YQ2|MED23_MOUSE Mediator of RNA polymerase II transcription subunit 23 OS=Mus musculus (Mouse) OX=10090 GN=Med23 PE=1 SV=2
63357	63357	63357	15306000	13171000	9796000	2.86037	-7.65364	Med30	sp|Q9CQI9|MED30_MOUSE Mediator of RNA polymerase II transcription subunit 30 OS=Mus musculus (Mouse) OX=10090 GN=Med30 PE=1 SV=1
1937100	63357	63357	5840800	2394200	4861700	1.42542	-2.66582	Med9	sp|Q8VCS6|MED9_MOUSE Mediator of RNA polymerase II transcription subunit 9 OS=Mus musculus (Mouse) OX=10090 GN=Med9 PE=2 SV=1
5443200	11898000	16313000	44250000	41416000	43770000	3.20729	-1.94338	Meig1	sp|Q61845|MEIG1_MOUSE Meiosis-expressed gene 1 protein OS=Mus musculus (Mouse) OX=10090 GN=Meig1 PE=1 SV=1
63357	63357	63357	25314000	23724000	17608000	3.15188	-8.45384	Mettl20	sp|Q80ZM3|ETKMT_MOUSE Electron transfer flavoprotein beta subunit lysine methyltransferase OS=Mus musculus (Mouse) OX=10090 GN=Mettl20 PE=1 SV=1
3243400	63357	63357	102800000	53608000	75565000	2.22758	-6.10502	Mfsd8	sp|Q8BH31|MFSD8_MOUSE Major facilitator superfamily domain-containing protein 8 OS=Mus musculus (Mouse) OX=10090 GN=Mfsd8 PE=2 SV=1
63357	63357	63357	10520000	22157000	24883000	1.91246	-8.24238	Mgmt	sp|P26187|MGMT_MOUSE Methylated-DNA--protein-cysteine methyltransferase OS=Mus musculus (Mouse) OX=10090 GN=Mgmt PE=1 SV=3
34561000	218330000	194800000	440820000	490130000	448150000	2.18501	-1.62315	Mlf1	sp|Q9QWV4|MLF1_MOUSE Myeloid leukemia factor 1 OS=Mus musculus (Mouse) OX=10090 GN=Mlf1 PE=1 SV=1
63357	63357	63357	6611800	6561900	5729400	4.58146	-6.63594	Mnat1	sp|P51949|MAT1_MOUSE CDK-activating kinase assembly factor MAT1 OS=Mus musculus (Mouse) OX=10090 GN=Mnat1 PE=1 SV=2
57704000	127190000	130970000	311100000	376640000	247790000	2.02353	-1.56648	Mns1	sp|Q61884|MNS1_MOUSE Meiosis-specific nuclear structural protein 1 OS=Mus musculus (Mouse) OX=10090 GN=Mns1 PE=1 SV=1
63357	63357	63357	15369000	20414000	19530000	3.53178	-8.18494	Mok	sp|Q9WVS4|MOK_MOUSE MAPK/MAK/MRK overlapping kinase OS=Mus musculus (Mouse) OX=10090 GN=Mok PE=1 SV=1
63357	63357	63357	45180000	22086000	39326000	2.16107	-9.13135	Mon1b	sp|Q8BMQ8|MON1B_MOUSE Vacuolar fusion protein MON1 homolog B OS=Mus musculus (Mouse) OX=10090 GN=Mon1b PE=2 SV=1
63357	31445000	35520000	74006000	61562000	88687000	1.73127	-1.7423	Morn1	tr|A2RTS7|A2RTS7_MOUSE MCG3921, isoform CRA_b OS=Mus musculus (Mouse) OX=10090 GN=Morn1 PE=1 SV=1
63357	63357	63357	7716300	11049000	13924000	2.4214	-7.42614	Mppe1	sp|Q80XL7|MPPE1_MOUSE Metallophosphoesterase 1 OS=Mus musculus (Mouse) OX=10090 GN=Mppe1 PE=2 SV=1
63357	63357	7447600	13321000	14691000	11593000	1.8196	-2.3865	Mrpl17	sp|Q9D8P4|RM17_MOUSE 39S ribosomal protein L17, mitochondrial OS=Mus musculus (Mouse) OX=10090 GN=Mrpl17 PE=1 SV=1
63357	63357	63357	8488400	13481000	13648000	2.65364	-7.5499	Mrpl18	sp|Q9CQL5|RM18_MOUSE 39S ribosomal protein L18, mitochondrial OS=Mus musculus (Mouse) OX=10090 GN=Mrpl18 PE=1 SV=1
63357	63357	7648200	25568000	10316000	15831000	1.33682	-2.73368	Mrpl54	sp|Q9CPW3|RM54_MOUSE 39S ribosomal protein L54, mitochondrial OS=Mus musculus (Mouse) OX=10090 GN=Mrpl54 PE=1 SV=1
63357	5086900	5834100	19284000	13036000	15015000	2.02709	-2.10746	Mrpl55	sp|Q9CZ83|RM55_MOUSE 39S ribosomal protein L55, mitochondrial OS=Mus musculus (Mouse) OX=10090 GN=Mrpl55 PE=1 SV=1
2999800	63357	63357	7643600	4727800	7831900	1.8132	-2.69196	Mrps12	sp|O35680|RT12_MOUSE 28S ribosomal protein S12, mitochondrial OS=Mus musculus (Mouse) OX=10090 GN=Mrps12 PE=2 SV=1
63357	63357	63357	1921700	1308500	1220500	2.52413	-4.54942	Mthfd2l	sp|D3YZG8|MTD2L_MOUSE Probable bifunctional methylenetetrahydrofolate dehydrogenase/cyclohydrolase 2 OS=Mus musculus (Mouse) OX=10090 GN=Mthfd2l PE=3 SV=1
63357	3034400	63357	10734000	6277000	5901500	1.63358	-2.85763	Mthfr	sp|Q9WU20|MTHR_MOUSE Methylenetetrahydrofolate reductase OS=Mus musculus (Mouse) OX=10090 GN=Mthfr PE=1 SV=2
6332600	9713400	11007000	24428000	24391000	31873000	2.48124	-1.57664	Mtmr9	sp|Q9Z2D0|MTMR9_MOUSE Myotubularin-related protein 9 OS=Mus musculus (Mouse) OX=10090 GN=Mtmr9 PE=1 SV=2
27582000	63357	18032000	65882000	53251000	46216000	1.80173	-1.85596	Mtpap	sp|Q9D0D3|PAPD1_MOUSE Poly(A) RNA polymerase, mitochondrial OS=Mus musculus (Mouse) OX=10090 GN=Mtpap PE=1 SV=1
14481000	63357	63357	18453000	20791000	23071000	1.47805	-2.09285	Mtres1	sp|Q9CQF4|MRES1_MOUSE Mitochondrial transcription rescue factor 1 OS=Mus musculus (Mouse) OX=10090 GN=Mtres1 PE=1 SV=1
56738000	63357	58201000	147720000	162270000	80774000	1.36083	-1.76463	Muc5ac	tr|E9QAQ8|E9QAQ8_MOUSE Mucin 5, subtypes A and C, tracheobronchial/gastric OS=Mus musculus (Mouse) OX=10090 GN=Muc5ac PE=1 SV=5
63357	63357	63357	7168600	12176000	8859900	2.50145	-7.21324	Mul1	sp|Q8VCM5|MUL1_MOUSE Mitochondrial ubiquitin ligase activator of NFKB 1 OS=Mus musculus (Mouse) OX=10090 GN=Mul1 PE=1 SV=2
63357	63357	63357	9072800	11293000	7809800	3.10367	-7.21176	Mzt2	sp|Q9CQ25|MZT2_MOUSE Mitotic-spindle organizing protein 2 OS=Mus musculus (Mouse) OX=10090 GN=Mzt2 PE=1 SV=1
63357	63357	63357	8558100	7699500	5495000	2.85297	-6.83851	Naa38	sp|Q9D2U5|LSMD1_MOUSE N-alpha-acetyltransferase 38, NatC auxiliary subunit OS=Mus musculus (Mouse) OX=10090 GN=Naa38 PE=1 SV=1
18055000	35362000	30927000	102150000	82901000	87960000	2.90073	-1.6946	Nat9	sp|Q3UG98|NAT9_MOUSE N-acetyltransferase 9 OS=Mus musculus (Mouse) OX=10090 GN=Nat9 PE=1 SV=2
63357	63357	63357	16026000	12187000	14762000	3.64484	-7.82082	Ncdn	sp|Q9Z0E0|NCDN_MOUSE Neurochondrin OS=Mus musculus (Mouse) OX=10090 GN=Ncdn PE=1 SV=1
63357	63357	63357	6604000	11214000	7825300	2.451	-7.0759	Ncoa1	sp|P70365|NCOA1_MOUSE Nuclear receptor coactivator 1 OS=Mus musculus (Mouse) OX=10090 GN=Ncoa1 PE=1 SV=2
63357	63357	63357	18517000	16336000	25705000	2.68441	-8.31564	Nde1	sp|Q9CZA6|NDE1_MOUSE Nuclear distribution protein nudE homolog 1 OS=Mus musculus (Mouse) OX=10090 GN=Nde1 PE=1 SV=1
63357	63357	18206000	24908000	30128000	24304000	1.48929	-2.11363	Ndst1	sp|Q3UHN9|NDST1_MOUSE Bifunctional heparan sulfate N-deacetylase/N-sulfotransferase 1 OS=Mus musculus (Mouse) OX=10090 GN=Ndst1 PE=1 SV=2
63357	63357	63357	41508000	26315000	28669000	2.61188	-8.98773	Nek3	sp|Q9R0A5|NEK3_MOUSE Serine/threonine-protein kinase Nek3 OS=Mus musculus (Mouse) OX=10090 GN=Nek3 PE=1 SV=2
7402700	31756000	34297000	64824000	81586000	66083000	1.99105	-1.53247	Nek5	sp|Q7TSC3|NEK5_MOUSE Serine/threonine-protein kinase Nek5 OS=Mus musculus (Mouse) OX=10090 GN=Nek5 PE=2 SV=1
63357	63357	63357	27961000	15396000	18956000	2.2843	-8.35685	Neu1	sp|O35657|NEUR1_MOUSE Sialidase-1 OS=Mus musculus (Mouse) OX=10090 GN=Neu1 PE=1 SV=1
63357	63357	63357	3204200	5032200	1954200	1.6925	-5.74456	Nfkbia	sp|Q9Z1E3|IKBA_MOUSE NF-kappa-B inhibitor alpha OS=Mus musculus (Mouse) OX=10090 GN=Nfkbia PE=1 SV=2
6114000	63357	63357	14236000	10680000	10346000	1.82166	-2.49833	Nfkbib	sp|Q60778|IKBB_MOUSE NF-kappa-B inhibitor beta OS=Mus musculus (Mouse) OX=10090 GN=Nfkbib PE=1 SV=2
6122500	1838300	2757400	15033000	7651600	16927000	1.43772	-1.88586	Njmu	sp|Q9CYI0|NJMU_MOUSE Protein Njmu-R1 OS=Mus musculus (Mouse) OX=10090 GN=MGI:1917841 PE=1 SV=2
14112000	70366000	59459000	178270000	233400000	167220000	2.25043	-2.00785	Nme9	tr|A0A1L1SUL6|A0A1L1SUL6_MOUSE NDK domain-containing protein OS=Mus musculus (Mouse) OX=10090 GN=Nme9 PE=1 SV=1
63357	63357	63357	24071000	25559000	29078000	4.21617	-8.69383	No66	sp|Q9JJF3|RIOX1_MOUSE Ribosomal oxygenase 1 OS=Mus musculus (Mouse) OX=10090 GN=Riox1 PE=1 SV=2
63357	63357	63357	30452000	22399000	15337000	2.18331	-8.48684	Noc4l	sp|Q8BHY2|NOC4L_MOUSE Nucleolar complex protein 4 homolog OS=Mus musculus (Mouse) OX=10090 GN=Noc4l PE=2 SV=1
63357	46902000	46359000	110590000	123430000	130990000	2.25827	-1.96761	Nphp1	sp|Q9QY53|NPHP1_MOUSE Nephrocystin-1 OS=Mus musculus (Mouse) OX=10090 GN=Nphp1 PE=1 SV=1
7539500	8187400	8650100	20931000	26790000	24835000	3.10424	-1.57357	Npl	sp|Q9DCJ9|NPL_MOUSE N-acetylneuraminate lyase OS=Mus musculus (Mouse) OX=10090 GN=Npl PE=1 SV=1
63357	1730000	63357	5292100	4034900	6155700	2.26682	-3.05983	Nrf1	sp|Q9WU00|NRF1_MOUSE Nuclear respiratory factor 1 OS=Mus musculus (Mouse) OX=10090 GN=Nrf1 PE=1 SV=2
50118000	63357	63357	68001000	61706000	74337000	1.39933	-2.02184	Nsun7	sp|Q14AW5|NSUN7_MOUSE Putative methyltransferase NSUN7 OS=Mus musculus (Mouse) OX=10090 GN=Nsun7 PE=2 SV=2
7290500	63357	5619500	13833000	10647000	19147000	1.43778	-1.74967	Ntmt1	sp|Q8R2U4|NTM1A_MOUSE N-terminal Xaa-Pro-Lys N-methyltransferase 1 OS=Mus musculus (Mouse) OX=10090 GN=Ntmt1 PE=1 SV=3
63357	63357	6284200	9936700	9468500	9646200	1.65505	-2.18001	Oasl2	sp|Q9Z2F2|OASL2_MOUSE 2-5-oligoadenylate synthase-like protein 2 OS=Mus musculus (Mouse) OX=10090 GN=Oasl2 PE=1 SV=2
63357	183600000	111960000	246780000	443600000	443720000	1.52517	-1.93972	Odf3b	sp|Q5M8M2|ODF3B_MOUSE Outer dense fiber protein 3B OS=Mus musculus (Mouse) OX=10090 GN=Odf3b PE=2 SV=1
63357	63357	63357	10886000	9335500	2814700	1.43242	-6.92122	Olfml2a	sp|Q8BHP7|OLM2A_MOUSE Olfactomedin-like protein 2A OS=Mus musculus (Mouse) OX=10090 GN=Olfml2a PE=1 SV=1
63357	63357	63357	2086200	3148800	1661400	2.14192	-5.18123	Orm2	sp|P07361|A1AG2_MOUSE Alpha-1-acid glycoprotein 2 OS=Mus musculus (Mouse) OX=10090 GN=Orm2 PE=1 SV=1
63357	15576000	30348000	62453000	48049000	46243000	1.65911	-1.76911	Osbpl6	sp|Q8BXR9|OSBL6_MOUSE Oxysterol-binding protein-related protein 6 OS=Mus musculus (Mouse) OX=10090 GN=Osbpl6 PE=1 SV=1
62273000	170670000	97235000	468580000	504040000	515310000	3.4195	-2.17199	Oscp1	sp|Q8BHW2|OSCP1_MOUSE Protein OSCP1 OS=Mus musculus (Mouse) OX=10090 GN=Oscp1 PE=1 SV=1
63357	63357	63357	16536000	9941800	9731800	2.23739	-7.57369	Ostc	sp|Q78XF5|OSTC_MOUSE Oligosaccharyltransferase complex subunit OSTC OS=Mus musculus (Mouse) OX=10090 GN=Ostc PE=1 SV=1
27825000	141400000	114120000	283590000	249300000	297000000	2.09949	-1.55036	Pacrg	sp|Q9DAK2|PACRG_MOUSE Parkin coregulated gene protein homolog OS=Mus musculus (Mouse) OX=10090 GN=Pacrg PE=1 SV=1
63357	63357	63357	8815500	14067000	13611000	2.70608	-7.58496	Parp10	sp|Q8CIE4|PAR10_MOUSE Protein mono-ADP-ribosyltransferase PARP10 OS=Mus musculus (Mouse) OX=10090 GN=Parp10 PE=2 SV=1
63357	63357	63357	1281100	1586300	1200800	3.4123	-4.41978	Pcbp3	sp|P57722|PCBP3_MOUSE Poly(rC)-binding protein 3 OS=Mus musculus (Mouse) OX=10090 GN=Pcbp3 PE=1 SV=3
63357	63357	63357	23602000	19514000	20986000	4.23469	-8.39769	Pcdh7	tr|A0A0A6YY83|A0A0A6YY83_MOUSE Protocadherin 7 OS=Mus musculus (Mouse) OX=10090 GN=Pcdh7 PE=1 SV=1
63357	63357	63357	22366000	36954000	18431000	1.99496	-8.67618	Pctp	sp|P53808|PPCT_MOUSE Phosphatidylcholine transfer protein OS=Mus musculus (Mouse) OX=10090 GN=Pctp PE=1 SV=2
4125100	7969600	63357	17050000	30220000	30473000	1.92694	-2.6768	Pcyt1b	sp|Q811Q9|PCY1B_MOUSE Choline-phosphate cytidylyltransferase B OS=Mus musculus (Mouse) OX=10090 GN=Pcyt1b PE=1 SV=2
63357	6387700	63357	15826000	9439300	11078000	1.60034	-2.47998	Pdk2	sp|Q9JK42|PDK2_MOUSE [Pyruvate dehydrogenase (acetyl-transferring)] kinase isozyme 2, mitochondrial OS=Mus musculus (Mouse) OX=10090 GN=Pdk2 PE=1 SV=2
63357	63357	3327300	12551000	9788200	13141000	2.68554	-3.36067	Pdpn	sp|Q62011|PDPN_MOUSE Podoplanin OS=Mus musculus (Mouse) OX=10090 GN=Pdpn PE=1 SV=2
63357	63357	63357	27720000	34926000	26656000	3.47667	-8.87601	Pex26	sp|Q8BGI5|PEX26_MOUSE Peroxisome assembly protein 26 OS=Mus musculus (Mouse) OX=10090 GN=Pex26 PE=1 SV=2
63357	7717400	63357	18576000	14533000	12085000	1.76298	-2.52645	Phc2	sp|Q9QWH1|PHC2_MOUSE Polyhomeotic-like protein 2 OS=Mus musculus (Mouse) OX=10090 GN=Phc2 PE=1 SV=1
63357	63357	63357	21182000	19151000	31619000	2.46152	-8.56435	Phka2	sp|Q8BWJ3|KPB2_MOUSE Phosphorylase b kinase regulatory subunit alpha, liver isoform OS=Mus musculus (Mouse) OX=10090 GN=Phka2 PE=1 SV=1
5361600	6656200	63357	19347000	12892000	15125000	1.88161	-1.97103	Phkg2	sp|Q9DB30|PHKG2_MOUSE Phosphorylase b kinase gamma catalytic chain, liver/testis isoform OS=Mus musculus (Mouse) OX=10090 GN=Phkg2 PE=2 SV=2
63357	63357	18964000	22646000	38442000	26970000	1.36489	-2.20558	Phlda3	sp|Q9WV95|PHLA3_MOUSE Pleckstrin homology-like domain family A member 3 OS=Mus musculus (Mouse) OX=10090 GN=Phlda3 PE=1 SV=1
63357	63357	7249600	8392500	16334000	14274000	1.45036	-2.40252	Pi4kb	sp|Q8BKC8|PI4KB_MOUSE Phosphatidylinositol 4-kinase beta OS=Mus musculus (Mouse) OX=10090 GN=Pi4kb PE=1 SV=2
18628000	49948000	25178000	106550000	86367000	94140000	2.34378	-1.61439	Pibf1	tr|E9Q6K3|E9Q6K3_MOUSE Progesterone immunomodulatory-binding factor 1 OS=Mus musculus (Mouse) OX=10090 GN=Pibf1 PE=1 SV=1
63357	63357	63357	4306100	6000000	7854200	2.36966	-6.57811	Pick1	sp|Q62083|PICK1_MOUSE PRKCA-binding protein OS=Mus musculus (Mouse) OX=10090 GN=Pick1 PE=1 SV=2
63357	5791300	5354900	19891000	19193000	17569000	2.81684	-2.33742	Pla2g15	sp|Q8VEB4|PAG15_MOUSE Group XV phospholipase A2 OS=Mus musculus (Mouse) OX=10090 GN=Pla2g15 PE=1 SV=1
63357	63357	14159000	82315000	79616000	111670000	2.80593	-4.25943	Pla2g6	sp|P97819|PLPL9_MOUSE 85/88 kDa calcium-independent phospholipase A2 OS=Mus musculus (Mouse) OX=10090 GN=Pla2g6 PE=1 SV=3
27548000	63357	63357	65775000	58623000	60494000	2.29329	-2.74004	Plau	sp|P06869|UROK_MOUSE Urokinase-type plasminogen activator OS=Mus musculus (Mouse) OX=10090 GN=Plau PE=1 SV=1
3800500	63357	63357	12607000	8569400	9155400	2.11571	-2.94925	Plek2	sp|Q9WV52|PLEK2_MOUSE Pleckstrin-2 OS=Mus musculus (Mouse) OX=10090 GN=Plek2 PE=1 SV=1
63357	63357	63357	9912300	10999000	4796700	1.94837	-7.07954	Plekhm2	sp|Q80TQ5|PKHM2_MOUSE Pleckstrin homology domain-containing family M member 2 OS=Mus musculus (Mouse) OX=10090 GN=Plekhm2 PE=1 SV=2
63357	21326000	17009000	44110000	42729000	66297000	1.72509	-1.9957	Plod1	sp|Q9R0E2|PLOD1_MOUSE Procollagen-lysine,2-oxoglutarate 5-dioxygenase 1 OS=Mus musculus (Mouse) OX=10090 GN=Plod1 PE=1 SV=1
63357	63357	63357	39856000	98345000	51839000	1.62256	-9.96555	Plod2	sp|Q9R0B9|PLOD2_MOUSE Procollagen-lysine,2-oxoglutarate 5-dioxygenase 2 OS=Mus musculus (Mouse) OX=10090 GN=Plod2 PE=1 SV=2
26957000	62288000	73241000	225610000	250150000	274380000	3.22965	-2.20684	Poc1a	sp|Q8JZX3|POC1A_MOUSE POC1 centriolar protein homolog A OS=Mus musculus (Mouse) OX=10090 GN=Poc1a PE=2 SV=2
63357	63357	3292300	4989500	4235200	4713100	1.47926	-2.02735	Pold3	sp|Q9EQ28|DPOD3_MOUSE DNA polymerase delta subunit 3 OS=Mus musculus (Mouse) OX=10090 GN=Pold3 PE=1 SV=2
11232000	63357	63357	19536000	19828000	18307000	1.83334	-2.34405	Polr2g	sp|P62488|RPB7_MOUSE DNA-directed RNA polymerase II subunit RPB7 OS=Mus musculus (Mouse) OX=10090 GN=Polr2g PE=1 SV=1
63357	63357	63357	17591000	10792000	10484000	2.29003	-7.67586	Polr2l	sp|P62876|RPAB5_MOUSE DNA-directed RNA polymerases I, II, and III subunit RPABC5 OS=Mus musculus (Mouse) OX=10090 GN=Polr2l PE=3 SV=1
63357	63357	63357	7261600	8086000	10076000	3.26183	-7.06349	Pomgnt2	sp|Q8BW41|PMGT2_MOUSE Protein O-linked-mannose beta-1,4-N-acetylglucosaminyltransferase 2 OS=Mus musculus (Mouse) OX=10090 GN=Pomgnt2 PE=1 SV=1
67215000	77090000	91614000	383990000	376510000	373580000	5.57508	-2.26516	Pon1	sp|P52430|PON1_MOUSE Serum paraoxonase/arylesterase 1 OS=Mus musculus (Mouse) OX=10090 GN=Pon1 PE=1 SV=2
63357	63357	63357	12155000	15015000	32831000	1.43357	-8.3023	Ppcdc	sp|Q8BZB2|COAC_MOUSE Phosphopantothenoylcysteine decarboxylase OS=Mus musculus (Mouse) OX=10090 GN=Ppcdc PE=1 SV=1
63357	63357	63357	9201700	9525100	12429000	3.26018	-7.35682	Ppp1r14c	sp|Q8R4S0|PP14C_MOUSE Protein phosphatase 1 regulatory subunit 14C OS=Mus musculus (Mouse) OX=10090 GN=Ppp1r14c PE=1 SV=1
63357	55205000	35836000	124620000	133990000	129120000	2.42088	-2.08946	Ppp1r32	sp|Q148A4|PPR32_MOUSE Protein phosphatase 1 regulatory subunit 32 OS=Mus musculus (Mouse) OX=10090 GN=Ppp1r32 PE=1 SV=1
3930200	10660000	7210700	48606000	22743000	27269000	1.44933	-2.17746	Ppp2r3c	sp|Q9JK24|P2R3C_MOUSE Serine/threonine-protein phosphatase 2A regulatory subunit B subunit gamma OS=Mus musculus (Mouse) OX=10090 GN=Ppp2r3c PE=1 SV=2
63357	63357	63357	15104000	21232000	20253000	3.23189	-8.21784	Prkcz	sp|Q02956|KPCZ_MOUSE Protein kinase C zeta type OS=Mus musculus (Mouse) OX=10090 GN=Prkcz PE=1 SV=2
63357	63357	63357	19534000	40394000	53926000	1.71427	-9.22643	Prmt6	sp|Q6NZB1|ANM6_MOUSE Protein arginine N-methyltransferase 6 OS=Mus musculus (Mouse) OX=10090 GN=Prmt6 PE=1 SV=2
63357	63357	63357	103270000	101690000	82350000	3.84889	-10.5619	Pros1	sp|Q08761|PROS_MOUSE Vitamin K-dependent protein S OS=Mus musculus (Mouse) OX=10090 GN=Pros1 PE=2 SV=1
26923000	68870000	66471000	158890000	204670000	166100000	2.46987	-1.70672	Prss30	sp|Q9QYZ9|PRS30_MOUSE Serine protease 30 OS=Mus musculus (Mouse) OX=10090 GN=Prss30 PE=2 SV=2
63357	63357	63357	24191000	19213000	22119000	3.94856	-8.42932	Psmg4	sp|P0C7N9|PSMG4_MOUSE Proteasome assembly chaperone 4 OS=Mus musculus (Mouse) OX=10090 GN=Psmg4 PE=1 SV=1
63357	63357	63357	22001000	40689000	23102000	2.03534	-8.81816	Ptpn18	sp|Q61152|PTN18_MOUSE Tyrosine-protein phosphatase non-receptor type 18 OS=Mus musculus (Mouse) OX=10090 GN=Ptpn18 PE=1 SV=1
63357	63357	63357	11121000	9798500	8751800	3.86154	-7.28639	Ptprg	sp|Q05909|PTPRG_MOUSE Receptor-type tyrosine-protein phosphatase gamma OS=Mus musculus (Mouse) OX=10090 GN=Ptprg PE=1 SV=1
63357	63357	63357	26180000	35233000	16712000	2.08153	-8.6831	Ptpru	sp|B1AUH1|PTPRU_MOUSE Receptor-type tyrosine-protein phosphatase U OS=Mus musculus (Mouse) OX=10090 GN=Ptpru PE=1 SV=1
63357	29279000	25161000	70880000	81564000	83999000	2.43125	-2.11708	Pygl	sp|Q9ET01|PYGL_MOUSE Glycogen phosphorylase, liver form OS=Mus musculus (Mouse) OX=10090 GN=Pygl PE=1 SV=4
63357	63357	63357	7324200	10111000	9640000	3.31721	-7.15429	Pygo2	tr|Q80V76|Q80V76_MOUSE PHD-type domain-containing protein OS=Mus musculus (Mouse) OX=10090 GN=Pygo2 PE=1 SV=1
63357	63357	63357	1977100	760670	2241000	1.60446	-4.71118	Q8K039	sp|Q8K039|K1143_MOUSE Uncharacterized protein KIAA1143 homolog OS=Mus musculus (Mouse) OX=10090 GN=MGI:1913452 PE=1 SV=1
27264000	20898000	32062000	133560000	91123000	130320000	2.54775	-2.14573	Qil1	sp|Q8R404|MIC13_MOUSE MICOS complex subunit MIC13 OS=Mus musculus (Mouse) OX=10090 GN=Micos13 PE=1 SV=1
63357	63357	63357	24210000	28400000	29594000	4.12779	-8.75653	Qtrtd1	sp|B8ZXI1|QTRT2_MOUSE Queuine tRNA-ribosyltransferase accessory subunit 2 OS=Mus musculus (Mouse) OX=10090 GN=Qtrt2 PE=1 SV=2
63357	63357	63357	11291000	9789000	6217300	2.41219	-7.16608	Rab28	sp|Q99KL7|RAB28_MOUSE Ras-related protein Rab-28 OS=Mus musculus (Mouse) OX=10090 GN=Rab28 PE=1 SV=1
63357	63357	8151500	12336000	11514000	17195000	1.55822	-2.30982	Rab33b	sp|O35963|RB33B_MOUSE Ras-related protein Rab-33B OS=Mus musculus (Mouse) OX=10090 GN=Rab33b PE=1 SV=1
63357	44400000	41738000	85822000	102600000	100770000	1.93896	-1.74625	Rabl2	sp|E9Q9D5|RBL2A_MOUSE Rab-like protein 2A OS=Mus musculus (Mouse) OX=10090 GN=Rabl2 PE=1 SV=1
63357	63357	63357	8536100	5132900	8802600	2.48558	-6.88542	Rac3	sp|P60764|RAC3_MOUSE Ras-related C3 botulinum toxin substrate 3 OS=Mus musculus (Mouse) OX=10090 GN=Rac3 PE=1 SV=1
63357	63357	63357	26698000	19136000	37451000	2.18975	-8.77537	Rbm7	sp|Q9CQT2|RBM7_MOUSE RNA-binding protein 7 OS=Mus musculus (Mouse) OX=10090 GN=Rbm7 PE=1 SV=1
63357	63357	63357	8001300	7968500	6206400	3.60872	-6.86633	Rbpj	sp|P31266|SUH_MOUSE Recombining binding protein suppressor of hairless OS=Mus musculus (Mouse) OX=10090 GN=Rbpj PE=1 SV=1
63357	63357	63357	41247000	42955000	32519000	3.56111	-9.26231	Rfc1	sp|P35601|RFC1_MOUSE Replication factor C subunit 1 OS=Mus musculus (Mouse) OX=10090 GN=Rfc1 PE=1 SV=2
63357	63357	63357	11272000	7592400	4263300	1.71044	-6.92694	Rgl2	sp|Q61193|RGL2_MOUSE Ral guanine nucleotide dissociation stimulator-like 2 OS=Mus musculus (Mouse) OX=10090 GN=Rgl2 PE=1 SV=2
63357	63357	63357	2858700	5111100	4349700	2.44043	-6.01826	Rhbdl2	sp|A2AGA4|RHBL2_MOUSE Rhomboid-related protein 2 OS=Mus musculus (Mouse) OX=10090 GN=Rhbdl2 PE=1 SV=1
63357	63357	6005200	14798000	8452100	10755000	1.57381	-2.47134	Ribc1	sp|Q9D0B8|RIBC1_MOUSE RIB43A-like with coiled-coils protein 1 OS=Mus musculus (Mouse) OX=10090 GN=Ribc1 PE=2 SV=1
63357	63357	6958100	25710000	17864000	10485000	1.46479	-2.93173	Ripk3	sp|Q9QZL0|RIPK3_MOUSE Receptor-interacting serine/threonine-protein kinase 3 OS=Mus musculus (Mouse) OX=10090 GN=Ripk3 PE=1 SV=2
63357	63357	63357	29816000	48288000	27280000	2.2145	-9.1149	Rngtt	sp|O55236|MCE1_MOUSE mRNA-capping enzyme OS=Mus musculus (Mouse) OX=10090 GN=Rngtt PE=1 SV=1
63357	63357	63357	15328000	19981000	31533000	2.0026	-8.45807	Rpap1	sp|Q80TE0|RPAP1_MOUSE RNA polymerase II-associated protein 1 OS=Mus musculus (Mouse) OX=10090 GN=Rpap1 PE=1 SV=2
61674000	88604000	90161000	322290000	286410000	255150000	3.19399	-1.84511	Rpgrip1l	sp|Q8CG73|FTM_MOUSE Protein fantom OS=Mus musculus (Mouse) OX=10090 GN=Rpgrip1l PE=1 SV=2
63357	63357	63357	24132000	27090000	18809000	3.18326	-8.52531	Rpp40	sp|Q8R1F9|RPP40_MOUSE Ribonuclease P protein subunit p40 OS=Mus musculus (Mouse) OX=10090 GN=Rpp40 PE=2 SV=2
63357	63357	9498800	12261000	13380000	12481000	1.39961	-1.98569	Rprd1a	sp|Q8VDS4|RPR1A_MOUSE Regulation of nuclear pre-mRNA domain-containing protein 1A OS=Mus musculus (Mouse) OX=10090 GN=Rprd1a PE=1 SV=1
63357	63357	63357	15139000	11225000	13867000	3.49779	-7.72563	Rps6ka2	sp|Q9WUT3|KS6A2_MOUSE Ribosomal protein S6 kinase alpha-2 OS=Mus musculus (Mouse) OX=10090 GN=Rps6ka2 PE=1 SV=1
39739000	209780000	279800000	467940000	664390000	496150000	1.75469	-1.62132	Rsph1	sp|Q8VIG3|RSPH1_MOUSE Radial spoke head 1 homolog OS=Mus musculus (Mouse) OX=10090 GN=Rsph1 PE=1 SV=2
63357	67086000	53745000	118540000	143520000	144340000	1.89597	-1.74915	Rsph14	sp|Q9D3W1|RSP14_MOUSE Radial spoke head 14 homolog OS=Mus musculus (Mouse) OX=10090 GN=Rsph14 PE=2 SV=1
92751000	403850000	486450000	1044400000	981010000	900350000	2.15685	-1.57347	Rsph9	sp|Q9D9V4|RSPH9_MOUSE Radial spoke head protein 9 homolog OS=Mus musculus (Mouse) OX=10090 GN=Rsph9 PE=1 SV=1
63357	63357	63357	23562000	30090000	27083000	3.84913	-8.73051	Rtn4ip1	sp|Q924D0|RT4I1_MOUSE Reticulon-4-interacting protein 1, mitochondrial OS=Mus musculus (Mouse) OX=10090 GN=Rtn4ip1 PE=1 SV=2
63357	63357	63357	7851100	15039000	6548500	1.67854	-7.27503	Samd4b	sp|Q80XS6|SMAG2_MOUSE Protein Smaug homolog 2 OS=Mus musculus (Mouse) OX=10090 GN=Samd4b PE=1 SV=1
23960000	20535000	36657000	134700000	175160000	128080000	2.80824	-2.43203	Sar1a	sp|P36536|SAR1A_MOUSE GTP-binding protein SAR1a OS=Mus musculus (Mouse) OX=10090 GN=Sar1a PE=1 SV=1
63357	63357	63357	8290900	4843700	3069000	1.59677	-6.41363	Saysd1	sp|Q8K190|SMDC1_MOUSE SAYSvFN domain-containing protein 1 OS=Mus musculus (Mouse) OX=10090 GN=Saysd1 PE=1 SV=1
63357	228410000	63357	775760000	621580000	371310000	1.66568	-2.95215	Scgb1a1	sp|Q06318|UTER_MOUSE Uteroglobin OS=Mus musculus (Mouse) OX=10090 GN=Scgb1a1 PE=1 SV=1
622900000	3642500000	2824200000	10972000000	9406200000	10791000000	2.83747	-2.13634	Sec14l3	tr|Q5SQ27|Q5SQ27_MOUSE MCG140354 OS=Mus musculus (Mouse) OX=10090 GN=Sec14l3 PE=1 SV=1
63357	63357	3684400	13235000	23648000	9274000	1.47022	-3.59826	Sema3f	sp|O88632|SEM3F_MOUSE Semaphorin-3F OS=Mus musculus (Mouse) OX=10090 GN=Sema3f PE=2 SV=2
63357	10771000	63357	15490000	14189000	12216000	1.31021	-1.94275	Senp3	sp|Q9EP97|SENP3_MOUSE Sentrin-specific protease 3 OS=Mus musculus (Mouse) OX=10090 GN=Senp3 PE=1 SV=1
63357	63357	63357	13200000	18459000	18791000	3.11979	-8.05217	Sfi1	sp|Q3UZY0|SFI1_MOUSE Protein SFI1 homolog OS=Mus musculus (Mouse) OX=10090 GN=Sfi1 PE=2 SV=1
63357	63357	63357	5338200	4426100	6544800	3.02807	-6.42299	Sgms1	sp|Q8VCQ6|SMS1_MOUSE Phosphatidylcholine:ceramide cholinephosphotransferase 1 OS=Mus musculus (Mouse) OX=10090 GN=Sgms1 PE=1 SV=2
63357	63357	21558000	29574000	43381000	28682000	1.44046	-2.22868	Sh2b1	sp|Q91ZM2|SH2B1_MOUSE SH2B adapter protein 1 OS=Mus musculus (Mouse) OX=10090 GN=Sh2b1 PE=1 SV=2
63357	63357	63357	14279000	31383000	33448000	1.90849	-8.70118	Shroom4	sp|Q1W617|SHRM4_MOUSE Protein Shroom4 OS=Mus musculus (Mouse) OX=10090 GN=Shroom4 PE=1 SV=1
63357	63357	63357	5286500	5696700	11397000	1.70043	-6.87954	Sirt4	sp|Q8R216|SIR4_MOUSE NAD-dependent protein lipoamidase sirtuin-4, mitochondrial OS=Mus musculus (Mouse) OX=10090 GN=Sirt4 PE=1 SV=3
63357	63357	63357	24365000	21952000	41466000	2.04834	-8.85126	Slc11a2	sp|P49282|NRAM2_MOUSE Natural resistance-associated macrophage protein 2 OS=Mus musculus (Mouse) OX=10090 GN=Slc11a2 PE=1 SV=2
63357	63357	63357	14294000	11887000	16178000	3.45944	-7.79999	Slc17a5	sp|Q8BN82|S17A5_MOUSE Sialin OS=Mus musculus (Mouse) OX=10090 GN=Slc17a5 PE=1 SV=2
12295000	63357	6402600	17718000	22205000	19574000	1.64576	-1.66508	Slc23a4	tr|A0A0J9YUX7|A0A0J9YUX7_MOUSE Solute carrier family 23 member 4 OS=Mus musculus (Mouse) OX=10090 GN=Slc23a4 PE=4 SV=1
63357	63357	63357	37337000	32096000	32438000	4.435	-9.06599	Slc25a18	sp|Q9DB41|GHC2_MOUSE Mitochondrial glutamate carrier 2 OS=Mus musculus (Mouse) OX=10090 GN=Slc25a18 PE=1 SV=4
63357	63357	4077000	8309900	8125200	11973000	1.9327	-2.75657	Slc25a21	sp|Q8BZ09|ODC_MOUSE Mitochondrial 2-oxodicarboxylate carrier OS=Mus musculus (Mouse) OX=10090 GN=Slc25a21 PE=1 SV=1
63357	63357	63357	14078000	5887200	12825000	1.88637	-7.43058	Slc29a3	sp|Q99P65|S29A3_MOUSE Equilibrative nucleoside transporter 3 OS=Mus musculus (Mouse) OX=10090 GN=Slc29a3 PE=1 SV=1
63357	63357	63357	18751000	23746000	13614000	2.50731	-8.2056	Slc30a1	sp|Q60738|ZNT1_MOUSE Zinc transporter 1 OS=Mus musculus (Mouse) OX=10090 GN=Slc30a1 PE=1 SV=1
63357	63357	63357	14141000	8525100	12555000	2.65581	-7.53376	Slc6a8	sp|Q8VBW1|SC6A8_MOUSE Sodium- and chloride-dependent creatine transporter 1 OS=Mus musculus (Mouse) OX=10090 GN=Slc6a8 PE=1 SV=1
63357	63357	63357	22051000	27119000	31118000	3.27979	-8.7225	Slc7a5	sp|Q9Z127|LAT1_MOUSE Large neutral amino acids transporter small subunit 1 OS=Mus musculus (Mouse) OX=10090 GN=Slc7a5 PE=1 SV=2
63357	63357	63357	19248000	17131000	14611000	3.64597	-8.06753	Slco4c1	sp|Q8BGD4|SO4C1_MOUSE Solute carrier organic anion transporter family member 4C1 OS=Mus musculus (Mouse) OX=10090 GN=Slco4c1 PE=1 SV=1
63357	63357	63357	54947000	40149000	37511000	2.90574	-9.4464	Smg9	sp|Q9DB90|SMG9_MOUSE Protein SMG9 OS=Mus musculus (Mouse) OX=10090 GN=Smg9 PE=1 SV=1
63357	63357	63357	4280200	4764300	7159400	2.41011	-6.41366	Smim1	sp|P0C8K7|SMIM1_MOUSE Small integral membrane protein 1 OS=Mus musculus (Mouse) OX=10090 GN=Smim1 PE=1 SV=1
63357	63357	63357	4282700	1980800	1943300	1.58578	-5.43221	Smox	sp|Q99K82|SMOX_MOUSE Spermine oxidase OS=Mus musculus (Mouse) OX=10090 GN=Smox PE=1 SV=1
63357	63357	18206000	45303000	35057000	36791000	2.07112	-2.67588	Sntb1	sp|Q99L88|SNTB1_MOUSE Beta-1-syntrophin OS=Mus musculus (Mouse) OX=10090 GN=Sntb1 PE=1 SV=4
63357	63357	63357	2859500	2132700	2748400	3.43156	-5.34784	Socs6	sp|Q9JLY0|SOCS6_MOUSE Suppressor of cytokine signaling 6 OS=Mus musculus (Mouse) OX=10090 GN=Socs6 PE=1 SV=2
63357	77254000	56063000	162800000	132710000	152530000	1.88188	-1.74808	Sorbs3	sp|Q9R1Z8|VINEX_MOUSE Vinexin OS=Mus musculus (Mouse) OX=10090 GN=Sorbs3 PE=1 SV=1
63357	7788300	8738500	11784000	19024000	16481000	1.37649	-1.51118	Spag8	sp|Q3V0Q6|SPAG8_MOUSE Sperm-associated antigen 8 OS=Mus musculus (Mouse) OX=10090 GN=Spag8 PE=1 SV=1
63357	63357	63357	8021600	6509900	9345800	3.1883	-6.97296	Spata17	sp|Q9D552|SPT17_MOUSE Spermatogenesis-associated protein 17 OS=Mus musculus (Mouse) OX=10090 GN=Spata17 PE=2 SV=1
63357	47930000	75813000	166460000	153310000	135290000	2.00562	-1.87797	Spef1	sp|Q99JL1|SPEF1_MOUSE Sperm flagellar protein 1 OS=Mus musculus (Mouse) OX=10090 GN=Spef1 PE=1 SV=1
63357	63357	63357	18538000	15745000	18026000	4.45345	-8.10438	Spin1	sp|Q61142|SPIN1_MOUSE Spindlin-1 OS=Mus musculus (Mouse) OX=10090 GN=Spin1 PE=1 SV=2
63357	63357	11959000	16662000	23619000	25907000	1.69031	-2.45327	Srp19	sp|Q9D7A6|SRP19_MOUSE Signal recognition particle 19 kDa protein OS=Mus musculus (Mouse) OX=10090 GN=Srp19 PE=1 SV=1
63357	63357	63357	11551000	13920000	17620000	2.89822	-7.8247	St3gal6	sp|Q8VIB3|SIA10_MOUSE Type 2 lactosamine alpha-2,3-sialyltransferase OS=Mus musculus (Mouse) OX=10090 GN=St3gal6 PE=2 SV=3
63357	63357	63357	12246000	12978000	11183000	4.6867	-7.58153	Stk11	sp|Q9WTK7|STK11_MOUSE Serine/threonine-protein kinase STK11 OS=Mus musculus (Mouse) OX=10090 GN=Stk11 PE=1 SV=1
48297000	63357	35887000	84826000	74506000	86166000	1.64365	-1.54301	Stk36	sp|Q69ZM6|STK36_MOUSE Serine/threonine-protein kinase 36 OS=Mus musculus (Mouse) OX=10090 GN=Stk36 PE=1 SV=3
7545800	99962000	86365000	215990000	240890000	149130000	1.58636	-1.64423	Stmnd1	sp|Q6P3A1|STMD1_MOUSE Stathmin domain-containing protein 1 OS=Mus musculus (Mouse) OX=10090 GN=Stmnd1 PE=2 SV=1
63357	63357	63357	61684000	33003000	86246000	1.76178	-9.8947	Stoml3	sp|Q6PE84|STML3_MOUSE Stomatin-like protein 3 OS=Mus musculus (Mouse) OX=10090 GN=Stoml3 PE=1 SV=2
63357	46812000	36413000	78468000	103840000	94751000	1.80591	-1.73401	Stxbp4	sp|Q9WV89|STXB4_MOUSE Syntaxin-binding protein 4 OS=Mus musculus (Mouse) OX=10090 GN=Stxbp4 PE=1 SV=1
63357	63357	63357	12318000	12604000	6089300	2.07369	-7.35011	Sumf1	sp|Q8R0F3|SUMF1_MOUSE Formylglycine-generating enzyme OS=Mus musculus (Mouse) OX=10090 GN=Sumf1 PE=1 SV=2
63357	63357	63357	10852000	12545000	9270700	3.47902	-7.42518	Taf5l	sp|Q91WQ5|TAF5L_MOUSE TAF5-like RNA polymerase II p300/CBP-associated factor-associated factor 65 kDa subunit 5L OS=Mus musculus (Mouse) OX=10090 GN=Taf5l PE=2 SV=1
63357	63357	63357	19281000	22683000	14700000	2.90665	-8.21975	Tango6	sp|Q8C3S2|TNG6_MOUSE Transport and Golgi organization protein 6 homolog OS=Mus musculus (Mouse) OX=10090 GN=Tango6 PE=1 SV=1
63357	63357	63357	10639000	13716000	8990500	2.87423	-7.45481	Tbc1d19	tr|Q8VDV7|Q8VDV7_MOUSE Rab-GAP TBC domain-containing protein OS=Mus musculus (Mouse) OX=10090 GN=Tbc1d19 PE=1 SV=1
63357	29870000	32310000	72689000	85825000	75227000	2.16837	-1.90892	Tchp	sp|Q3TVW5|TCHP_MOUSE Trichoplein keratin filament-binding protein OS=Mus musculus (Mouse) OX=10090 GN=Tchp PE=1 SV=2
63357	27463000	11040000	59721000	47633000	62176000	2.05508	-2.13613	Tcp11	sp|Q01755|TCP11_MOUSE T-complex protein 11 OS=Mus musculus (Mouse) OX=10090 GN=Tcp11 PE=1 SV=1
19386000	63357	94949000	260880000	312890000	274160000	2.75759	-2.88988	Tcte1	sp|A6H639|DRC5_MOUSE Dynein regulatory complex subunit 5 OS=Mus musculus (Mouse) OX=10090 GN=Tcte1 PE=1 SV=1
63357	35824000	53438000	151890000	170920000	174780000	2.85777	-2.47782	Tctex1d4	sp|Q8CDY7|TC1D4_MOUSE Tctex1 domain-containing protein 4 OS=Mus musculus (Mouse) OX=10090 GN=Tctex1d4 PE=1 SV=1
63357	8466400	16180000	25823000	29213000	26920000	1.7956	-1.72977	Tctn1	sp|Q8BZ64|TECT1_MOUSE Tectonic-1 OS=Mus musculus (Mouse) OX=10090 GN=Tctn1 PE=1 SV=1
63357	10670000	63357	35717000	40119000	38610000	3.10661	-3.406	Tctn2	sp|Q2MV57|TECT2_MOUSE Tectonic-2 OS=Mus musculus (Mouse) OX=10090 GN=Tctn2 PE=1 SV=2
63357	63357	63357	48808000	67511000	57511000	3.36611	-9.83692	Tecpr2	tr|Q3UH45|Q3UH45_MOUSE Tectonin beta-propeller repeat-containing 2 OS=Mus musculus (Mouse) OX=10090 GN=Tecpr2 PE=1 SV=1
2383300	63357	4080600	18978000	17361000	26007000	2.51923	-3.25575	Tefm	sp|Q5SSK3|TEFM_MOUSE Transcription elongation factor, mitochondrial OS=Mus musculus (Mouse) OX=10090 GN=Tefm PE=1 SV=1
63357	63357	27077000	58529000	48168000	56218000	2.04513	-2.58224	Thoc6	sp|Q5U4D9|THOC6_MOUSE THO complex subunit 6 homolog OS=Mus musculus (Mouse) OX=10090 GN=Thoc6 PE=1 SV=1
63357	7200200	63357	7331100	13662000	14211000	1.33934	-2.26447	Timm10b	sp|Q9WV96|T10B_MOUSE Mitochondrial import inner membrane translocase subunit Tim10 B OS=Mus musculus (Mouse) OX=10090 GN=Timm10b PE=1 SV=1
54297000	55963000	63357	104360000	107710000	102230000	1.67702	-1.5104	Tmem106b	sp|Q80X71|T106B_MOUSE Transmembrane protein 106B OS=Mus musculus (Mouse) OX=10090 GN=Tmem106b PE=1 SV=1
63357	63357	63357	19055000	12715000	40600000	1.33395	-8.57271	Tmem132a	sp|Q922P8|T132A_MOUSE Transmembrane protein 132A OS=Mus musculus (Mouse) OX=10090 GN=Tmem132a PE=1 SV=2
63357	63357	63357	12859000	11091000	9355300	3.39763	-7.45307	Tmem17	sp|Q8K0U3|TMM17_MOUSE Transmembrane protein 17 OS=Mus musculus (Mouse) OX=10090 GN=Tmem17 PE=1 SV=1
63357	63357	63357	16241000	11817000	13022000	3.30361	-7.75575	Tmem177	sp|Q8BPE4|TM177_MOUSE Transmembrane protein 177 OS=Mus musculus (Mouse) OX=10090 GN=Tmem177 PE=1 SV=1
63357	63357	16262000	24976000	35722000	30200000	1.78811	-2.47155	Tmem212	sp|Q8C6V3|TM212_MOUSE Transmembrane protein 212 OS=Mus musculus (Mouse) OX=10090 GN=Tmem212 PE=2 SV=2
63357	63357	63357	10715000	14876000	10020000	2.83371	-7.54964	Tmem223	sp|Q9CQE2|TM223_MOUSE Transmembrane protein 223 OS=Mus musculus (Mouse) OX=10090 GN=Tmem223 PE=2 SV=1
63357	12410000	16509000	26876000	35801000	31733000	1.76027	-1.70376	Tmem237	sp|Q3V0J1|TM237_MOUSE Transmembrane protein 237 OS=Mus musculus (Mouse) OX=10090 GN=Tmem237 PE=1 SV=1
63357	63357	63357	12475000	10048000	7537400	2.65567	-7.30518	Tmem238	sp|A9JSM3|TM238_MOUSE Transmembrane protein 238 OS=Mus musculus (Mouse) OX=10090 GN=Tmem238 PE=2 SV=1
63357	63357	63357	11693000	16760000	14655000	3.20499	-7.82527	Tmem70	sp|Q921N7|TMM70_MOUSE Transmembrane protein 70, mitochondrial OS=Mus musculus (Mouse) OX=10090 GN=Tmem70 PE=2 SV=2
63357	63357	63357	8498400	6557000	9126100	3.30684	-6.99122	Tmem9	sp|Q9CR23|TMEM9_MOUSE Transmembrane protein 9 OS=Mus musculus (Mouse) OX=10090 GN=Tmem9 PE=1 SV=1
63357	63357	63357	9568000	12981000	7663400	2.52255	-7.31246	Tmlhe	sp|Q91ZE0|TMLH_MOUSE Trimethyllysine dioxygenase, mitochondrial OS=Mus musculus (Mouse) OX=10090 GN=Tmlhe PE=1 SV=2
21950000	24767000	26314000	70594000	68101000	79914000	3.65738	-1.58177	Tmprss2	sp|Q9JIQ8|TMPS2_MOUSE Transmembrane protease serine 2 OS=Mus musculus (Mouse) OX=10090 GN=Tmprss2 PE=2 SV=3
63357	63357	63357	26963000	45917000	17973000	1.66954	-8.90085	Tor1a	sp|Q9ER39|TOR1A_MOUSE Torsin-1A OS=Mus musculus (Mouse) OX=10090 GN=Tor1a PE=1 SV=1
63357	63357	63357	38264000	44871000	54789000	3.17481	-9.50312	Tpcn1	sp|Q9EQJ0|TPC1_MOUSE Two pore calcium channel protein 1 OS=Mus musculus (Mouse) OX=10090 GN=Tpcn1 PE=1 SV=1
63357	63357	63357	40464000	34845000	30973000	3.67283	-9.12714	Tpgs1	sp|Q99MS8|TPGS1_MOUSE Tubulin polyglutamylase complex subunit 1 OS=Mus musculus (Mouse) OX=10090 GN=Tpgs1 PE=1 SV=1
63357	63357	63357	17762000	29837000	23248000	2.59945	-8.54202	Traf3ip2	tr|Q8N7N6|Q8N7N6_MOUSE SEFIR domain-containing protein OS=Mus musculus (Mouse) OX=10090 GN=Traf3ip2 PE=1 SV=1
63357	63357	63357	15118000	5278800	9933800	1.61779	-7.31809	Traf6	sp|P70196|TRAF6_MOUSE TNF receptor-associated factor 6 OS=Mus musculus (Mouse) OX=10090 GN=Traf6 PE=1 SV=2
63357	63357	63357	51859000	36626000	34589000	2.77566	-9.33877	Trim3	sp|Q9R1R2|TRIM3_MOUSE Tripartite motif-containing protein 3 OS=Mus musculus (Mouse) OX=10090 GN=Trim3 PE=1 SV=1
63357	63357	24168000	64205000	54044000	59230000	2.40279	-2.86893	Trip6	sp|Q9Z1Y4|TRIP6_MOUSE Thyroid receptor-interacting protein 6 OS=Mus musculus (Mouse) OX=10090 GN=Trip6 PE=1 SV=1
63357	63357	63357	35412000	30745000	24609000	3.19072	-8.89947	Trmt10c	sp|Q3UFY8|TM10C_MOUSE tRNA methyltransferase 10 homolog C OS=Mus musculus (Mouse) OX=10090 GN=Trmt10c PE=1 SV=2
63357	63357	63357	41513000	27123000	29847000	2.75519	-9.01719	Trmt61a	sp|Q80XC2|TRM61_MOUSE tRNA (adenine(58)-N(1))-methyltransferase catalytic subunit TRMT61A OS=Mus musculus (Mouse) OX=10090 GN=Trmt61a PE=1 SV=1
63357	63357	63357	17471000	21614000	31983000	2.26607	-8.54652	Tsc22d2	tr|E9Q7M2|E9Q7M2_MOUSE TSC22 domain family, member 2 OS=Mus musculus (Mouse) OX=10090 GN=Tsc22d2 PE=1 SV=1
63357	63357	63357	27890000	35011000	20570000	2.57809	-8.77859	Tsen34	sp|Q8BMZ5|SEN34_MOUSE tRNA-splicing endonuclease subunit Sen34 OS=Mus musculus (Mouse) OX=10090 GN=Tsen34 PE=2 SV=2
153190000	417040000	398260000	1403300000	1336000000	1155600000	3.0093	-2.00778	Tsga10	sp|Q6NY15|TSG10_MOUSE Testis-specific gene 10 protein OS=Mus musculus (Mouse) OX=10090 GN=Tsga10 PE=1 SV=1
4869000	63357	63357	9476500	12289000	15599000	1.97251	-2.90291	Tspan15	sp|F7BWT7|TSN15_MOUSE Tetraspanin-15 OS=Mus musculus (Mouse) OX=10090 GN=Tspan15 PE=1 SV=2
63357	63357	63357	5837100	7291900	3840100	2.2989	-6.48023	Tssc4	sp|Q9JHE7|TSSC4_MOUSE Protein TSSC4 OS=Mus musculus (Mouse) OX=10090 GN=Tssc4 PE=1 SV=1
63357	79691000	72422000	167670000	247210000	196680000	1.94769	-2.00675	Ttc12	sp|Q8BW49|TTC12_MOUSE Tetratricopeptide repeat protein 12 OS=Mus musculus (Mouse) OX=10090 GN=Ttc12 PE=1 SV=1
5141300	21412000	24013000	54424000	49638000	53620000	2.37481	-1.64077	Ttc30a1	sp|Q99J38|T30A1_MOUSE Tetratricopeptide repeat protein 30A1 OS=Mus musculus (Mouse) OX=10090 GN=Ttc30a1 PE=1 SV=1
63357	63357	63357	7932000	10491000	10150000	3.52893	-7.23197	Ttc34	sp|Q8C0Q3|TTC34_MOUSE Tetratricopeptide repeat protein 34 OS=Mus musculus (Mouse) OX=10090 GN=Ttc34 PE=2 SV=2
63357	63357	63357	14357000	12853000	14201000	5.06157	-7.76733	Ttc39c	sp|Q8VE09|TT39C_MOUSE Tetratricopeptide repeat protein 39C OS=Mus musculus (Mouse) OX=10090 GN=Ttc39c PE=1 SV=2
63357	63357	63357	26958000	17757000	24109000	2.9614	-8.50023	Tusc3	sp|Q8BTV1|TUSC3_MOUSE Tumor suppressor candidate 3 OS=Mus musculus (Mouse) OX=10090 GN=Tusc3 PE=1 SV=1
63357	63357	63357	5166700	10566000	5839600	1.86189	-6.8265	Twistnb	sp|Q78WZ7|RPA43_MOUSE DNA-directed RNA polymerase I subunit RPA43 OS=Mus musculus (Mouse) OX=10090 GN=Twistnb PE=1 SV=1
63357	63357	9531700	17837000	18160000	13574000	1.72545	-2.35964	Txndc15	sp|Q6P6J9|TXD15_MOUSE Thioredoxin domain-containing protein 15 OS=Mus musculus (Mouse) OX=10090 GN=Txndc15 PE=1 SV=1
63357	63357	63357	6688700	11778000	7106300	2.18203	-7.07194	Txnip	sp|Q8BG60|TXNIP_MOUSE Thioredoxin-interacting protein OS=Mus musculus (Mouse) OX=10090 GN=Txnip PE=1 SV=1
3151400	63357	63357	10334000	9080200	8487600	2.67052	-3.08942	Txnl4a	sp|P83877|TXN4A_MOUSE Thioredoxin-like protein 4A OS=Mus musculus (Mouse) OX=10090 GN=Txnl4a PE=1 SV=1
17931000	63357	63357	21135000	27318000	40862000	1.33399	-2.30629	Ubac2	sp|Q8R1K1|UBAC2_MOUSE Ubiquitin-associated domain-containing protein 2 OS=Mus musculus (Mouse) OX=10090 GN=Ubac2 PE=1 SV=1
63357	63357	63357	5814800	5072800	9142100	2.21128	-6.71946	Ube2c	sp|Q9D1C1|UBE2C_MOUSE Ubiquitin-conjugating enzyme E2 C OS=Mus musculus (Mouse) OX=10090 GN=Ube2c PE=1 SV=1
63357	63357	63357	10418000	10471000	12504000	4.06214	-7.45686	Ube2e1	sp|P52482|UB2E1_MOUSE Ubiquitin-conjugating enzyme E2 E1 OS=Mus musculus (Mouse) OX=10090 GN=Ube2e1 PE=1 SV=1
63357	41080000	34627000	69446000	72948000	76043000	1.67872	-1.52751	Ubxn10	sp|Q8BG34|UBX10_MOUSE UBX domain-containing protein 10 OS=Mus musculus (Mouse) OX=10090 GN=Ubxn10 PE=2 SV=1
63357	63357	3545700	13318000	11900000	5965400	1.65038	-3.08598	Uchl1	sp|Q9R0P9|UCHL1_MOUSE Ubiquitin carboxyl-terminal hydrolase isozyme L1 OS=Mus musculus (Mouse) OX=10090 GN=Uchl1 PE=1 SV=1
63357	63357	63357	10055000	12708000	11865000	3.90063	-7.50926	Usp2	sp|O88623|UBP2_MOUSE Ubiquitin carboxyl-terminal hydrolase 2 OS=Mus musculus (Mouse) OX=10090 GN=Usp2 PE=1 SV=2
63357	63357	63357	14118000	9290900	22911000	1.73998	-7.92895	Usp48	sp|Q3V0C5|UBP48_MOUSE Ubiquitin carboxyl-terminal hydrolase 48 OS=Mus musculus (Mouse) OX=10090 GN=Usp48 PE=1 SV=2
63357	63357	63357	14680000	11698000	10817000	3.34095	-7.61243	Utp18	sp|Q5SSI6|UTP18_MOUSE U3 small nucleolar RNA-associated protein 18 homolog OS=Mus musculus (Mouse) OX=10090 GN=Utp18 PE=1 SV=1
63357	63357	63357	21247000	26695000	19910000	3.39075	-8.47971	Uvrag	sp|Q8K245|UVRAG_MOUSE UV radiation resistance-associated protein OS=Mus musculus (Mouse) OX=10090 GN=Uvrag PE=1 SV=2
63357	63357	63357	22353000	22447000	23165000	7.00207	-8.48211	Vcam1	sp|P29533|VCAM1_MOUSE Vascular cell adhesion protein 1 OS=Mus musculus (Mouse) OX=10090 GN=Vcam1 PE=1 SV=1
63357	63357	63357	14100000	10313000	6587800	2.04264	-7.34962	Vhl	sp|P40338|VHL_MOUSE von Hippel-Lindau disease tumor suppressor OS=Mus musculus (Mouse) OX=10090 GN=Vhl PE=1 SV=1
969450	63357	3098100	4784800	5232500	5583200	1.83421	-1.91706	Vtcn1	sp|Q7TSP5|VTCN1_MOUSE V-set domain containing T-cell activation inhibitor 1 OS=Mus musculus (Mouse) OX=10090 GN=Vtcn1 PE=1 SV=1
63357	63357	63357	4617200	2711100	1672900	1.56683	-5.56551	Wdfy2	sp|Q8BUB4|WDFY2_MOUSE WD repeat and FYVE domain-containing protein 2 OS=Mus musculus (Mouse) OX=10090 GN=Wdfy2 PE=1 SV=2
63357	63357	63357	39925000	49326000	43472000	4.06213	-9.44766	Wdr24	sp|Q8CFJ9|WDR24_MOUSE GATOR complex protein WDR24 OS=Mus musculus (Mouse) OX=10090 GN=Wdr24 PE=1 SV=1
63357	29421000	25477000	73288000	61715000	57752000	1.95028	-1.81028	Wdr34	sp|Q5U4F6|WDR34_MOUSE WD repeat-containing protein 34 OS=Mus musculus (Mouse) OX=10090 GN=Wdr34 PE=1 SV=2
51560000	176090000	362720000	603380000	609300000	650660000	2.00867	-1.6582	Wdr35	sp|Q8BND3|WDR35_MOUSE WD repeat-containing protein 35 OS=Mus musculus (Mouse) OX=10090 GN=Wdr35 PE=1 SV=3
21848000	82356000	89067000	207900000	215530000	204260000	2.5866	-1.69943	Wdr54	sp|Q9R0D8|WDR54_MOUSE WD repeat-containing protein 54 OS=Mus musculus (Mouse) OX=10090 GN=Wdr54 PE=1 SV=1
45065000	55241000	57144000	195360000	157960000	198480000	3.19965	-1.80925	Wdr60	sp|Q8C761|WDR60_MOUSE WD repeat-containing protein 60 OS=Mus musculus (Mouse) OX=10090 GN=Wdr60 PE=1 SV=1
63357	63357	63357	23519000	12219000	19066000	2.28464	-8.1716	Wdr7	sp|Q920I9|WDR7_MOUSE WD repeat-containing protein 7 OS=Mus musculus (Mouse) OX=10090 GN=Wdr7 PE=1 SV=3
63357	76394000	46647000	188160000	193820000	203810000	2.61216	-2.2505	Wdr90	sp|Q6ZPG2|WDR90_MOUSE WD repeat-containing protein 90 OS=Mus musculus (Mouse) OX=10090 GN=Wdr90 PE=1 SV=2
63357	63357	63357	46269000	28212000	25134000	2.1339	-9.03368	Xpo4	sp|Q9ESJ0|XPO4_MOUSE Exportin-4 OS=Mus musculus (Mouse) OX=10090 GN=Xpo4 PE=1 SV=2
63357	63357	63357	3735500	5253000	7467500	2.12665	-6.43593	Xrra1	sp|Q3U3V8|XRRA1_MOUSE X-ray radiation resistance-associated protein 1 OS=Mus musculus (Mouse) OX=10090 GN=Xrra1 PE=2 SV=1
63357	63357	63357	10400000	12407000	21027000	1.95331	-7.84937	Ybx2	sp|Q9Z2C8|YBOX2_MOUSE Y-box-binding protein 2 OS=Mus musculus (Mouse) OX=10090 GN=Ybx2 PE=1 SV=1
63357	63357	63357	12415000	16774000	19304000	2.87873	-7.99509	Yrdc	sp|Q3U5F4|YRDC_MOUSE YrdC domain-containing protein, mitochondrial OS=Mus musculus (Mouse) OX=10090 GN=Yrdc PE=1 SV=1
22800000	19629000	63357	59172000	65563000	63078000	2.56166	-2.14402	Zc3h3	sp|Q8CHP0|ZC3H3_MOUSE Zinc finger CCCH domain-containing protein 3 OS=Mus musculus (Mouse) OX=10090 GN=Zc3h3 PE=1 SV=1
63357	26426000	4155500	31544000	46779000	53509000	1.49357	-2.10498	Zc3h7b	tr|F8VPP8|F8VPP8_MOUSE Zinc finger CCCH type-containing 7B OS=Mus musculus (Mouse) OX=10090 GN=Zc3h7b PE=1 SV=1
6603900	63357	63357	14328000	9096300	8702100	1.39228	-2.25495	Zdhhc20	sp|Q5Y5T1|ZDH20_MOUSE Palmitoyltransferase ZDHHC20 OS=Mus musculus (Mouse) OX=10090 GN=Zdhhc20 PE=1 SV=1
63357	63357	63357	9590200	6793800	7524600	3.1539	-6.97485	Zdhhc3	sp|Q8R173|ZDHC3_MOUSE Palmitoyltransferase ZDHHC3 OS=Mus musculus (Mouse) OX=10090 GN=Zdhhc3 PE=1 SV=1
4791200	7665200	63357	17502000	21211000	15491000	2.12597	-2.11419	Zfyve1	sp|Q810J8|ZFYV1_MOUSE Zinc finger FYVE domain-containing protein 1 OS=Mus musculus (Mouse) OX=10090 GN=Zfyve1 PE=1 SV=2
63357	63357	63357	9017600	12055000	9122300	3.25816	-7.31162	Zmym6nb	sp|Q3U0Y2|TM35B_MOUSE Transmembrane protein 35B OS=Mus musculus (Mouse) OX=10090 GN=Tmem35b PE=1 SV=2
63357	24432000	46537000	89648000	91819000	93060000	2.13781	-1.9504	Zmynd10	sp|Q99ML0|ZMY10_MOUSE Zinc finger MYND domain-containing protein 10 OS=Mus musculus (Mouse) OX=10090 GN=Zmynd10 PE=1 SV=2
63357	63357	63357	39548000	18524000	18305000	1.64475	-8.65046	Zmynd12	tr|A2BGJ5|A2BGJ5_MOUSE MYND-type domain-containing protein OS=Mus musculus (Mouse) OX=10090 GN=Zmynd12 PE=2 SV=1
63357	63357	3642800	9157400	6541700	5233100	1.58296	-2.47327	Zwint	sp|Q9CQU5|ZWINT_MOUSE ZW10 interactor OS=Mus musculus (Mouse) OX=10090 GN=Zwint PE=1 SV=1

## Sheet: Underrepresented Srsf1NRS P22 
LFQ intensity 75-SRSF1HOMP22	LFQ intensity 76-SRSF1HOMP22	LFQ intensity 62-SRSF1HOMP23	LFQ intensity 78-SRSF1WTP22	LFQ intensity 79-SRSF1WTP22	LFQ intensity 63-SRSF1WTP23	LFQ intensity 66-SRSF1WTP23	log10 p	log2FC	Gene names	Fasta headers
174660	174660	174660	4085100	5213000	6835300	8250600	2.55884	-5.12524	1700012B09Rik	sp|Q9DAE7|CK097_MOUSE Uncharacterized protein C11orf97 homolog OS=Mus musculus OX=10090 PE=1 SV=1
5684600	4885200	7007300	9098400	21874000	18189000	29784000	1.37824	-1.75212	Acr	sp|P23578|ACRO_MOUSE Acrosin OS=Mus musculus OX=10090 GN=Acr PE=1 SV=1
15727000	7276800	25425000	47947000	49461000	41395000	58574000	2.55731	-1.61198	Acrbp	sp|Q3V140|ACRBP_MOUSE Acrosin-binding protein OS=Mus musculus OX=10090 GN=Acrbp PE=1 SV=1
7896300	6406800	889280	16759000	12151000	14305000	17634000	2.1514	-1.58685	Actn3	sp|O88990|ACTN3_MOUSE Alpha-actinin-3 OS=Mus musculus OX=10090 GN=Actn3 PE=2 SV=1
28925000	9714500	22224000	39163000	53648000	70289000	103320000	1.38271	-1.71502	Adam2	sp|Q60718|ADAM2_MOUSE Disintegrin and metalloproteinase domain-containing protein 2 OS=Mus musculus OX=10090 GN=Adam2 PE=1 SV=2
174660	174660	174660	3653600	2526400	4108400	4890600	2.79577	-4.44138	Agbl5	sp|Q09M02|CBPC5_MOUSE Cytosolic carboxypeptidase-like protein 5 OS=Mus musculus OX=10090 GN=Agbl5 PE=1 SV=2
3826800	1195600	174660	5456300	5777700	3127100	6126400	1.41627	-1.56394	Arhgap20	sp|Q6IFT4|RHG20_MOUSE Rho GTPase-activating protein 20 OS=Mus musculus OX=10090 GN=Arhgap20 PE=1 SV=1
342800000	350930000	425920000	1047600000	1000200000	1133900000	1054900000	4.93223	-1.50482	Ass1	sp|P16460|ASSY_MOUSE Argininosuccinate synthase OS=Mus musculus OX=10090 GN=Ass1 PE=1 SV=1
3482900	2887600	1362400	9240900	6406200	10830000	10929000	2.38544	-1.85915	Atl1	sp|Q8BH66|ATLA1_MOUSE Atlastin-1 OS=Mus musculus OX=10090 GN=Atl1 PE=1 SV=1
47188000	5863500	41469000	56526000	134750000	122350000	177830000	1.46606	-1.96333	Ccdc40	sp|Q8BI79|CCD40_MOUSE Coiled-coil domain-containing protein 40 OS=Mus musculus OX=10090 GN=Ccdc40 PE=1 SV=1
16949000	30521000	8079900	82954000	55259000	59102000	73018000	2.48258	-1.86784	Bhmt	sp|O35490|BHMT1_MOUSE Betaine--homocysteine S-methyltransferase 1 OS=Mus musculus OX=10090 GN=Bhmt PE=1 SV=1
8099600	174660	174660	9361700	7773800	8512900	8678500	1.3006	-1.60746	C8g	sp|Q8VCG4|CO8G_MOUSE Complement component C8 gamma chain OS=Mus musculus OX=10090 GN=C8g PE=1 SV=1
174660	174660	174660	3776000	3388900	3210500	5927100	2.47697	-4.5444	Cage1	sp|Q5IR70|CAGE1_MOUSE Cancer-associated gene 1 protein homolog OS=Mus musculus OX=10090 GN=Cage1 PE=1 SV=2
7167500	174660	1903600	7903200	11910000	17225000	18524000	1.6112	-2.1722	Catsperb	sp|A2RTF1|CTSRB_MOUSE Cation channel sperm-associated protein subunit beta OS=Mus musculus OX=10090 GN=Catsperb PE=1 SV=1
174660	174660	174660	1822400	20549000	16392000	26433000	1.31511	-6.5441	Catspere	sp|P0DP43|CTSRE_MOUSE Cation channel sperm-associated protein subunit epsilon OS=Mus musculus OX=10090 GN=Catspere PE=1 SV=1
4556100	174660	1700300	6022400	5695700	6899500	10335000	1.56097	-1.75553	Ccdc134	sp|Q8C7V8|CC134_MOUSE Coiled-coil domain-containing protein 134 OS=Mus musculus OX=10090 GN=Ccdc134 PE=1 SV=1
6389200	174660	1347500	7761200	10568000	12394000	19837000	1.47279	-2.26097	CFAP251	sp|E9Q743|CF251_MOUSE Cilia- and flagella-associated protein 251 OS=Mus musculus OX=10090 GN=Cfap251 PE=1 SV=1
1393600	174660	174660	2679300	2349100	3068000	4498800	1.95113	-2.43826	Ccna1	sp|Q61456|CCNA1_MOUSE Cyclin-A1 OS=Mus musculus OX=10090 GN=Ccna1 PE=1 SV=2
7977100	3693600	7341500	26012000	31789000	12787000	16127000	1.46606	-1.77432	Ccnb2	sp|P30276|CCNB2_MOUSE G2/mitotic-specific cyclin-B2 OS=Mus musculus OX=10090 GN=Ccnb2 PE=1 SV=2
18908000	3486100	16006000	32138000	43743000	50536000	57609000	2.15587	-1.84569	Cct6b	sp|Q61390|TCPW_MOUSE T-complex protein 1 subunit zeta-2 OS=Mus musculus OX=10090 GN=Cct6b PE=1 SV=4
9937700	4340900	5489600	14798000	22401000	19820000	20980000	2.50651	-1.56524	Cfap57	sp|Q9D180|CFA57_MOUSE Cilia- and flagella-associated protein 57 OS=Mus musculus OX=10090 GN=Cfap57 PE=1 SV=3
1404300	174660	953120	3282100	4424800	5252200	10471000	1.33307	-2.79493	CFAP91	sp|Q8BRC6|CFA91_MOUSE Cilia- and flagella-associated protein 91 OS=Mus musculus OX=10090 GN=Cfap91 PE=1 SV=3
4246900	7949900	2604600	11801000	21959000	19699000	31942000	1.63423	-2.11348	Dnah12	sp|Q3V0Q1|DYH12_MOUSE Dynein heavy chain 12, axonemal OS=Mus musculus OX=10090 GN=Dnah12 PE=1 SV=2
7500600	4118100	4072900	10547000	20502000	22859000	29071000	1.68437	-1.98772	Dnah17	sp|Q69Z23|DYH17_MOUSE Dynein heavy chain 17, axonemal OS=Mus musculus OX=10090 GN=Dnah17 PE=1 SV=2
11648000	6780200	4290500	19216000	20356000	23927000	29633000	2.29114	-1.62036	Dnah7c	tr|A0A087WR13|A0A087WR13_MOUSE Dynein, axonemal, heavy chain 7C OS=Mus musculus OX=10090 GN=Dnah7c PE=1 SV=1
174660	174660	4605800	4877800	8801300	7321900	9841100	1.72219	-2.22287	Creg2	sp|Q8BGC9|CREG2_MOUSE Protein CREG2 OS=Mus musculus OX=10090 GN=Creg2 PE=1 SV=1
25700000	20081000	70501000	264030000	262490000	429520000	377110000	2.65019	-3.1041	Cyp17a1	sp|P27786|CP17A_MOUSE Steroid 17-alpha-hydroxylase/17,20 lyase OS=Mus musculus OX=10090 GN=Cyp17a1 PE=1 SV=1
13816000	1936300	11521000	21970000	27718000	34694000	52693000	1.50979	-1.91437	Dkkl1	sp|Q9QZL9|DKKL1_MOUSE Dickkopf-like protein 1 OS=Mus musculus OX=10090 GN=Dkkl1 PE=1 SV=2
2838600	174660	2069500	6135300	5879400	5514500	9437500	1.98643	-1.99246	DNAI4	sp|E9PYY5|DNAI4_MOUSE Dynein intermediate chain 4, axonemal OS=Mus musculus OX=10090 GN=Dnai4 PE=1 SV=1
2872700	174660	4830100	9308900	15581000	18293000	32147000	1.41382	-2.84238	Drc1	sp|Q3USS3|DRC1_MOUSE Dynein regulatory complex protein 1 OS=Mus musculus OX=10090 GN=Drc1 PE=1 SV=1
33029000	14584000	29666000	48897000	63920000	70400000	100780000	1.66415	-1.46269	Dnaaf1	sp|Q9D2H9|DAAF1_MOUSE Dynein assembly factor 1, axonemal OS=Mus musculus OX=10090 GN=Dnaaf1 PE=1 SV=1
12852000	1792700	9655200	17373000	20812000	17839000	33648000	1.37207	-1.46867	Rsph3a;Rsph3b	sp|Q3UFY4|RSH3A_MOUSE Radial spoke head protein 3 homolog A OS=Mus musculus OX=10090 GN=Rsph3a PE=2 SV=1;sp|Q9DA80|RSH3B_MOUSE Radial spoke head protein 3 homolog B OS=Mus musculus OX=10090 GN=Rsph3b PE=2 SV=1
5910700	8802900	174660	13522000	9468400	17656000	17901000	1.54575	-1.56039	Dnaaf9	sp|Q7TT23|CT194_MOUSE Uncharacterized protein C20orf194 homolog OS=Mus musculus OX=10090 PE=1 SV=2
6915600	174660	174660	9383800	16001000	19417000	24504000	1.78587	-2.83892	Rsph6a	sp|Q8CDR2|RSH6A_MOUSE Radial spoke head protein 6 homolog A OS=Mus musculus OX=10090 GN=Rsph6a PE=1 SV=1
14064000	734970	174660	12740000	14446000	20134000	25581000	1.30532	-1.86848	Ttc30a2;Ttc30b	sp|A2AKQ8|T30A2_MOUSE Tetratricopeptide repeat protein 30A2 OS=Mus musculus OX=10090 GN=Ttc30a2 PE=1 SV=1;sp|Q9CY00|TT30B_MOUSE Tetratricopeptide repeat protein 30B OS=Mus musculus OX=10090 GN=Ttc30b PE=1 SV=1
1202100	949390	174660	8900400	9336000	11808000	21564000	1.74187	-4.05655	Dnajb13	sp|Q80Y75|DJB13_MOUSE DnaJ homolog subfamily B member 13 OS=Mus musculus OX=10090 GN=Dnajb13 PE=1 SV=1
5467200	7264600	174660	11899000	10919000	9348000	14829000	1.67741	-1.44938	Dnajb4	sp|Q9D832|DNJB4_MOUSE DnaJ homolog subfamily B member 4 OS=Mus musculus OX=10090 GN=Dnajb4 PE=1 SV=1
3231800	174660	1981200	7191100	8390200	8062100	10801000	2.66384	-2.2615	Axdnd1	sp|Q3UZ57|AXDN1_MOUSE Axonemal dynein light chain domain-containing protein 1 OS=Mus musculus OX=10090 GN=Axdnd1 PE=1 SV=1
6099700	7506600	2164400	9452200	10683000	20431000	21199000	1.31455	-1.55451	Dpy19l2	sp|P0CW70|D19L2_MOUSE Probable C-mannosyltransferase DPY19L2 OS=Mus musculus OX=10090 GN=Dpy19l2 PE=1 SV=1
174660	174660	2482400	13224000	17248000	11772000	13045000	3.39152	-3.8722	Cfap161	sp|Q6P8Y0|CF161_MOUSE Cilia- and flagella-associated protein 161 OS=Mus musculus OX=10090 GN=Cfap161 PE=1 SV=1
174660	174660	174660	16622000	8719600	13560000	18037000	2.65555	-6.34871	Dsg4	sp|Q7TMD7|DSG4_MOUSE Desmoglein-4 OS=Mus musculus OX=10090 GN=Dsg4 PE=2 SV=1
2756500	2170100	174660	3485000	5401800	5651500	5996000	1.84424	-1.59407	Enkd1	sp|Q7TSV9|ENKD1_MOUSE Enkurin domain-containing protein 1 OS=Mus musculus OX=10090 GN=Enkd1 PE=1 SV=1
4597600	174660	4987900	6242200	15344000	11334000	13818000	1.58838	-1.84459	Enpp5	sp|Q9EQG7|ENPP5_MOUSE Ectonucleotide pyrophosphatase/phosphodiesterase family member 5 OS=Mus musculus OX=10090 GN=Enpp5 PE=1 SV=3
4283000	174660	2967300	5817500	5969400	11137000	7472500	1.46021	-1.61841	Eps8l3	sp|Q91WL0|ES8L3_MOUSE Epidermal growth factor receptor kinase substrate 8-like protein 3 OS=Mus musculus OX=10090 GN=Eps8l3 PE=2 SV=1
6317900	174660	2729300	9316800	7057400	11749000	12037000	1.72918	-1.7076	Fam135a	sp|Q6NS59|F135A_MOUSE Protein FAM135A OS=Mus musculus OX=10090 GN=Fam135a PE=1 SV=2
7762700	174660	6665700	20719000	17254000	14389000	16916000	2.373	-1.83109	Fam188b	sp|Q3UQI9|MINY4_MOUSE Probable ubiquitin carboxyl-terminal hydrolase MINDY-4 OS=Mus musculus OX=10090 GN=Mindy4 PE=1 SV=1
26613000	9214500	16492000	29952000	49646000	54021000	71926000	1.55913	-1.559	Fank1	sp|Q9DAM9|FANK1_MOUSE Fibronectin type 3 and ankyrin repeat domains 1 protein OS=Mus musculus OX=10090 GN=Fank1 PE=1 SV=1
1463900	3535700	2863000	12945000	9005600	18314000	24336000	1.71838	-2.62343	Fbxw5	sp|Q9QXW2|FBXW5_MOUSE F-box/WD repeat-containing protein 5 OS=Mus musculus OX=10090 GN=Fbxw5 PE=1 SV=1
4262400	174660	174660	3984100	12450000	12358000	15236000	1.54976	-2.84001	Fsip2	sp|A2ARZ3|FSIP2_MOUSE Fibrous sheath-interacting protein 2 OS=Mus musculus OX=10090 GN=Fsip2 PE=1 SV=3
174660	174660	174660	4519800	9858100	7042700	11686000	2.13237	-5.56643	Galnt3	sp|P70419|GALT3_MOUSE Polypeptide N-acetylgalactosaminyltransferase 3 OS=Mus musculus OX=10090 GN=Galnt3 PE=1 SV=3
174660	3994800	174660	6531800	4060800	9421200	8129700	1.63235	-2.28063	Ggh	sp|Q9Z0L8|GGH_MOUSE Gamma-glutamyl hydrolase OS=Mus musculus OX=10090 GN=Ggh PE=1 SV=2
1190500	174660	174660	4605000	3307900	7373000	11634000	1.43537	-3.7128	Ggn	sp|Q80WJ1|GGN_MOUSE Gametogenetin OS=Mus musculus OX=10090 GN=Ggn PE=1 SV=2
174660	174660	174660	10680000	8668900	8815700	18172000	2.11214	-6.05146	Glipr1l1	sp|Q9DAG6|GPRL1_MOUSE GLIPR1-like protein 1 OS=Mus musculus OX=10090 GN=Glipr1l1 PE=1 SV=1;tr|A0A1W2P7V2|A0A1W2P7V2_MOUSE GLI pathogenesis-related 1-like 3 OS=Mus musculus OX=10090 GN=Glipr1l3 PE=3 SV=1
174660	174660	174660	5270400	9604000	11040000	11112000	2.59685	-5.72786	Gm166	sp|Q6NZQ0|CC189_MOUSE Coiled-coil domain-containing protein 189 OS=Mus musculus OX=10090 GN=Ccdc189 PE=1 SV=2
174660	174660	174660	2838600	1913800	1871100	3286800	2.58669	-3.82631	Gm9999	tr|Q8C5Y2|Q8C5Y2_MOUSE Predicted gene 9999 OS=Mus musculus OX=10090 GN=Gm9999 PE=2 SV=1
2490500	3951900	174660	4363300	5646400	6282000	7218000	1.60109	-1.41396	Gpm6b	sp|P35803|GPM6B_MOUSE Neuronal membrane glycoprotein M6-b OS=Mus musculus OX=10090 GN=Gpm6b PE=1 SV=2
174660	174660	8017700	8122300	10556000	9570900	9321100	1.47836	-1.75177	Gramd1a	sp|Q8VEF1|ASTRA_MOUSE Protein Aster-A OS=Mus musculus OX=10090 GN=Gramd1a PE=1 SV=2
1012900	174660	174660	1302800	2313700	2980400	1132800	1.32228	-2.08942	Heca	tr|Q3V1N5|Q3V1N5_MOUSE Hdc homolog, cell cycle regulator OS=Mus musculus OX=10090 GN=Heca PE=1 SV=1
3674100	174660	3027400	17799000	10318000	10802000	12935000	2.3195	-2.49974	Insl3	sp|O09107|INSL3_MOUSE Insulin-like 3 OS=Mus musculus OX=10090 GN=Insl3 PE=1 SV=2
1783800	174660	174660	9022400	8762200	2182500	7705900	1.6115	-3.2824	Iqank1	sp|Q3TYL0|IQAK1_MOUSE IQ motif and ankyrin repeat domain-containing protein 1 OS=Mus musculus OX=10090 GN=Iqank1 PE=1 SV=3
174660	174660	174660	2929800	4694400	7018500	11637000	1.45456	-5.23326	Izumo4	sp|D3Z690|IZUM4_MOUSE Izumo sperm-egg fusion protein 4 OS=Mus musculus OX=10090 GN=Izumo4 PE=1 SV=1
14049000	174660	23951000	33904000	38155000	37029000	36887000	2.00775	-1.52	Kiaa1324	sp|A2AFS3|ELAP1_MOUSE Endosome/lysosome-associated apoptosis and autophagy regulator 1 OS=Mus musculus OX=10090 GN=Elapor1 PE=1 SV=1
12559000	819970	7480500	18421000	41189000	38464000	53801000	1.71618	-2.44907	Kif9	sp|Q9WV04|KIF9_MOUSE Kinesin-like protein KIF9 OS=Mus musculus OX=10090 GN=Kif9 PE=1 SV=2
6168500	174660	3466000	19001000	11779000	5807900	15934000	1.35982	-2.00568	Lrch4	sp|Q921G6|LRCH4_MOUSE Leucine-rich repeat and calponin homology domain-containing protein 4 OS=Mus musculus OX=10090 GN=Lrch4 PE=1 SV=1
174660	174660	174660	9818900	18940000	8014000	7205900	1.7069	-5.97612	Cfap74	sp|Q3UY96|CFA74_MOUSE Cilia- and flagella-associated protein 74 OS=Mus musculus OX=10090 GN=Cfap74 PE=2 SV=3
8020900	174660	7002600	12239000	13003000	20532000	23363000	1.60314	-1.77052	Lypd4	sp|Q8BVP6|LYPD4_MOUSE Ly6/PLAUR domain-containing protein 4 OS=Mus musculus OX=10090 GN=Lypd4 PE=1 SV=1
18864000	3190100	9296300	27066000	23724000	29508000	32689000	1.99469	-1.43456	Mgat4d	sp|Q9D4R2|MGT4D_MOUSE Alpha-1,3-mannosyl-glycoprotein 4-beta-N-acetylglucosaminyltransferase-like protein MGAT4D OS=Mus musculus OX=10090 GN=Mgat4d PE=1 SV=2
8011100	174660	174660	8621900	8639800	11249000	10590000	1.52332	-1.81051	Mgll	sp|O35678|MGLL_MOUSE Monoglyceride lipase OS=Mus musculus OX=10090 GN=Mgll PE=1 SV=1
3948000	174660	174660	10404000	11000000	8702900	11931000	2.99603	-2.87514	Morn1	tr|A2RTS7|A2RTS7_MOUSE MORN repeat-containing 1 OS=Mus musculus OX=10090 GN=Morn1 PE=1 SV=1
174660	174660	7673500	9240700	13463000	22428000	11890000	1.47685	-2.41429	Msh3	sp|P13705|MSH3_MOUSE DNA mismatch repair protein Msh3 OS=Mus musculus OX=10090 GN=Msh3 PE=2 SV=3
174660	4385000	174660	4459400	8710800	7703300	6281600	1.6441	-2.10496	Ncaph2	sp|Q8BSP2|CNDH2_MOUSE Condensin-2 complex subunit H2 OS=Mus musculus OX=10090 GN=Ncaph2 PE=1 SV=1
5550000	2450000	3976600	10150000	11214000	14674000	23458000	1.51179	-1.89754	Nudt18	sp|Q3U2V3|NUD18_MOUSE 8-oxo-dGDP phosphatase NUDT18 OS=Mus musculus OX=10090 GN=Nudt18 PE=1 SV=1
10482000	1332900	10380000	15138000	16899000	21758000	31100000	1.42105	-1.52041	Nup210l	sp|Q9D2F7|P210L_MOUSE Nuclear pore membrane glycoprotein 210-like OS=Mus musculus OX=10090 GN=Nup210l PE=1 SV=2
14649000	3523700	12618000	20770000	28065000	22747000	37773000	1.62057	-1.41342	Pabpc2	tr|Q62029|Q62029_MOUSE Polyadenylate-binding protein OS=Mus musculus OX=10090 GN=Pabpc2 PE=1 SV=1
174660	174660	696910	2514600	2664500	4804200	3641600	2.29583	-3.28794	Pacrg	sp|Q9DAK2|PACRG_MOUSE Parkin coregulated gene protein homolog OS=Mus musculus OX=10090 GN=Pacrg PE=1 SV=1
24023000	13836000	23047000	38049000	51224000	56494000	70909000	1.98212	-1.41585	Pdcl2	sp|Q78Y63|PDCL2_MOUSE Phosducin-like protein 2 OS=Mus musculus OX=10090 GN=Pdcl2 PE=1 SV=1
14449000	8544600	14271000	20261000	34746000	35397000	42552000	1.81414	-1.42003	Pde1c	sp|Q64338|PDE1C_MOUSE Calcium/calmodulin-dependent 3,5-cyclic nucleotide phosphodiesterase 1C OS=Mus musculus OX=10090 GN=Pde1c PE=1 SV=2
174660	174660	174660	7984000	7485400	9164000	5351000	3.24646	-5.42352	Pebp4	sp|Q9D9G2|PEBP4_MOUSE Phosphatidylethanolamine-binding protein 4 OS=Mus musculus OX=10090 GN=Pebp4 PE=1 SV=1
30899000	17525000	32604000	59907000	65649000	78921000	97855000	2.20356	-1.4846	Pfkp	sp|Q9WUA3|PFKAP_MOUSE ATP-dependent 6-phosphofructokinase, platelet type OS=Mus musculus OX=10090 GN=Pfkp PE=1 SV=1
83730000	36300000	69249000	132940000	172070000	174970000	220040000	2.24898	-1.47184	Pgam2	sp|O70250|PGAM2_MOUSE Phosphoglycerate mutase 2 OS=Mus musculus OX=10090 GN=Pgam2 PE=1 SV=3
4294500	174660	1944200	5049400	6894800	5842200	11402000	1.33773	-1.77121	Pou5f2	sp|Q9DAC9|PO5F2_MOUSE POU domain, class 5, transcription factor 2 OS=Mus musculus OX=10090 GN=Pou5f2 PE=2 SV=1
10595000	3976600	10001000	19710000	28486000	27428000	46676000	1.62179	-1.90026	Ppp3cc	sp|P48455|PP2BC_MOUSE Serine/threonine-protein phosphatase 2B catalytic subunit gamma isoform OS=Mus musculus OX=10090 GN=Ppp3cc PE=1 SV=1
174660	174660	174660	16237000	15752000	12396000	14355000	4.51244	-6.39365	Ptdss2	sp|Q9Z1X2|PTSS2_MOUSE Phosphatidylserine synthase 2 OS=Mus musculus OX=10090 GN=Ptdss2 PE=1 SV=2
5240900	174660	174660	6271000	7011000	5918500	5069500	1.43012	-1.70316	Rnf6	sp|Q9DBU5|RNF6_MOUSE E3 ubiquitin-protein ligase RNF6 OS=Mus musculus OX=10090 GN=Rnf6 PE=1 SV=1
2841700	174660	1801500	12744000	10540000	26353000	26491000	1.7179	-3.56693	Dnaaf3	sp|Q3UYV8|DAAF3_MOUSE Dynein assembly factor 3, axonemal OS=Mus musculus OX=10090 GN=Dnaaf3 PE=1 SV=1
22842000	2289700	13175000	32733000	33374000	41473000	43340000	2.07658	-1.56308	Dnali1	sp|Q8BVN8|IDLC_MOUSE Axonemal dynein light intermediate polypeptide 1 OS=Mus musculus OX=10090 GN=Dnali1 PE=1 SV=1
31294000	15648000	3491500	196890000	168110000	161230000	85591000	2.27743	-3.18562	Serpina1e	sp|Q00898|A1AT5_MOUSE Alpha-1-antitrypsin 1-5 OS=Mus musculus OX=10090 GN=Serpina1e PE=1 SV=1
559020000	153190000	326590000	699120000	932050000	898770000	1178600000	1.90414	-1.4209	Slc2a3	sp|P32037|GTR3_MOUSE Solute carrier family 2, facilitated glucose transporter member 3 OS=Mus musculus OX=10090 GN=Slc2a3 PE=1 SV=1
8789700	174660	17221000	28310000	38607000	64382000	88125000	1.42483	-2.65185	Slxl1;Gm16405	tr|Q9D515|Q9D515_MOUSE Slx-like 1 OS=Mus musculus OX=10090 GN=Slxl1 PE=2 SV=1;tr|A6X8J1|A6X8J1_MOUSE Predicted gene 16405 OS=Mus musculus OX=10090 GN=Gm16405 PE=4 SV=1
5515200	270750	5952800	10515000	11831000	16690000	12676000	2.03327	-1.72418	Smco2	sp|Q9DA21|SMCO2_MOUSE Single-pass membrane and coiled-coil domain-containing protein 2 OS=Mus musculus OX=10090 GN=Smco2 PE=1 SV=1
174660	174660	5641800	6265000	5273200	9262900	7008200	1.37632	-1.79963	Smg5	sp|Q6ZPY2|SMG5_MOUSE Protein SMG5 OS=Mus musculus OX=10090 GN=Smg5 PE=1 SV=2
8224500	811500	2952900	10096000	11441000	15378000	19516000	1.64208	-1.81975	Spag17	sp|Q5S003|SPG17_MOUSE Sperm-associated antigen 17 OS=Mus musculus OX=10090 GN=Spag17 PE=1 SV=2
8830400	1955400	5869700	14153000	20566000	20952000	21188000	2.47658	-1.79118	Syce1l	sp|Q5D525|SYC1L_MOUSE Synaptonemal complex central element protein 1-like OS=Mus musculus OX=10090 GN=Syce1l PE=2 SV=2
174660	174660	174660	9000100	11135000	12350000	17698000	2.61645	-6.16651	Tbc1d12	sp|Q6A039|TBC12_MOUSE TBC1 domain family member 12 OS=Mus musculus OX=10090 GN=Tbc1d12 PE=1 SV=2
36432000	8344100	27935000	50621000	61555000	81155000	100590000	1.68272	-1.60014	Tdrd6	sp|P61407|TDRD6_MOUSE Tudor domain-containing protein 6 OS=Mus musculus OX=10090 GN=Tdrd6 PE=1 SV=1
5148900	174660	174660	5973800	8547100	10671000	15995000	1.49332	-2.49011	Tekt3	sp|Q6X6Z7|TEKT3_MOUSE Tektin-3 OS=Mus musculus OX=10090 GN=Tekt3 PE=2 SV=1
4419400	174660	6362400	13213000	14301000	19883000	25941000	1.93367	-2.32774	Tex22	sp|Q9D9U4|TEX22_MOUSE Testis-expressed protein 22 OS=Mus musculus OX=10090 GN=Tex22 PE=1 SV=1
4173100	174660	6961000	9041700	9337900	17079000	19467000	1.41913	-1.865	Tprn	sp|A2AI08|TPRN_MOUSE Taperin OS=Mus musculus OX=10090 GN=Tprn PE=1 SV=1
8381400	4164900	13459000	24778000	31068000	43754000	61193000	1.63333	-2.21329	Tsga8	sp|Q9JJL0|TSGA8_MOUSE Testis-specific gene A8 protein OS=Mus musculus OX=10090 GN=Tsga8 PE=1 SV=1
174660	2466500	995630	8529200	9566900	11575000	16213000	2.35165	-3.24222	Lrrc49	sp|Q91YK0|LRC49_MOUSE Leucine-rich repeat-containing protein 49 OS=Mus musculus OX=10090 GN=Lrrc49 PE=1 SV=1
174660	174660	1242300	2982400	4306400	6464700	4155800	2.13054	-3.0771	Wdr41	sp|Q3UDP0|WDR41_MOUSE WD repeat-containing protein 41 OS=Mus musculus OX=10090 GN=Wdr41 PE=1 SV=1
174660	174660	174660	2639700	1690100	2549700	4929100	1.70988	-4.07914	Zfp646	sp|Q6NV66|ZN646_MOUSE Zinc finger protein 646 OS=Mus musculus OX=10090 GN=Zfp646 PE=1 SV=1
174660	174660	174660	2128200	5981000	7064100	11715000	1.42288	-5.26629	Zmynd15	sp|Q8C0R7|ZMY15_MOUSE Zinc finger MYND domain-containing protein 15 OS=Mus musculus OX=10090 GN=Zmynd15 PE=1 SV=1
174660	174660	2640600	7661100	5337500	4890100	2726400	1.52706	-2.37049	Znf608	sp|Q56A10|ZN608_MOUSE Zinc finger protein 608 OS=Mus musculus OX=10090 GN=Znf608 PE=1 SV=1
174660	174660	174660	6450800	8909900	16351000	24609000	1.45696	-6.33297	Zpbp	sp|Q62522|ZPBP1_MOUSE Zona pellucida-binding protein 1 OS=Mus musculus OX=10090 GN=Zpbp PE=1 SV=2
