# Supplementary material for: Nucleo-cytoplasmic shuttling of splicing factor SRSF1 is required for development and cilia function
Source: eLife journal article supplement (doi:10.7554/elife.65104), 2021-08-02
Supplement: supp [file elife-65104-supp-v1.zip]

**SRSF1 antibody**

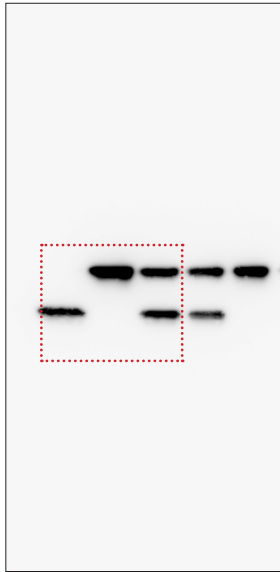

**WB: SRSF1**

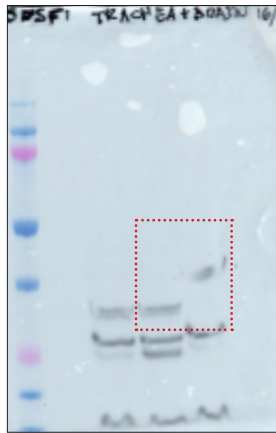

**Brain  
(P23)**

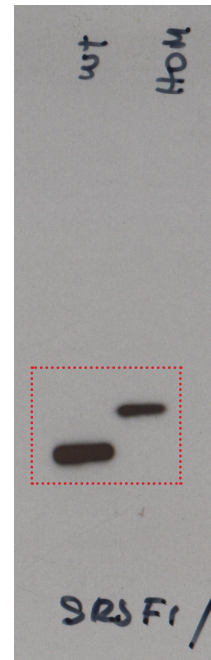

**WB: SRSF1**

**T7 antibody**

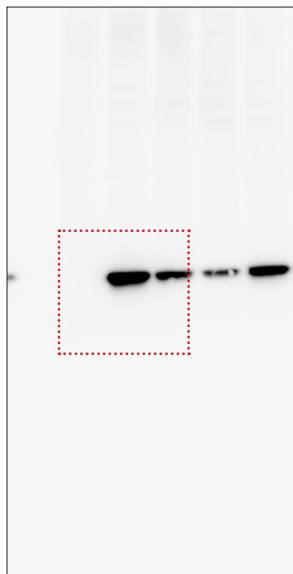

**WB: T7**

**ESCs**

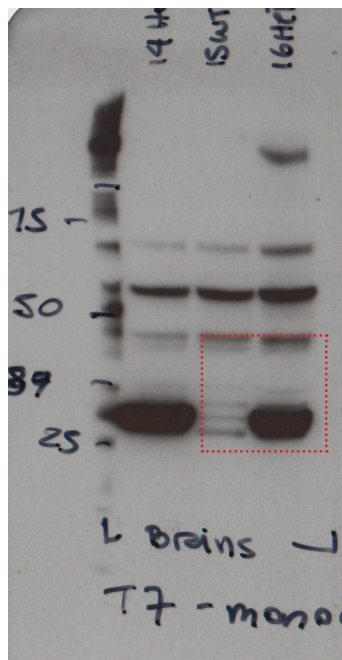

**WB: T7**

**Brains**

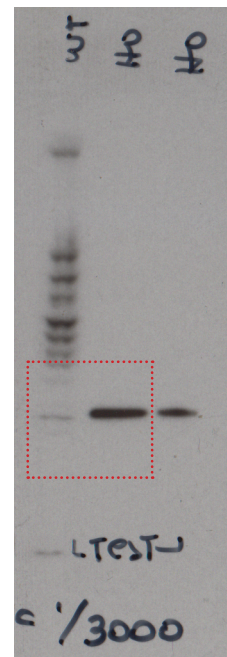

**WB: T7**

**Testes**

**Brain and Testes samples developed with T7 are from different animals than those developed with SRSF1 antibody.**
