# Supplementary material for: Nucleo-cytoplasmic shuttling of splicing factor SRSF1 is required for development and cilia function
Source: eLife journal article supplement (doi:10.7554/elife.65104), 2021-08-02
Supplement: supp [file elife-65104-supp-v1.zip]

WB: SRSF1

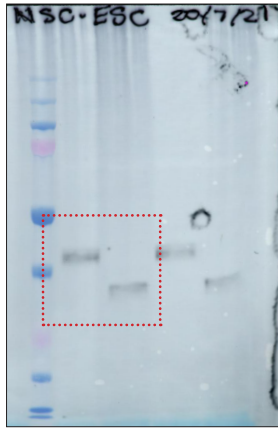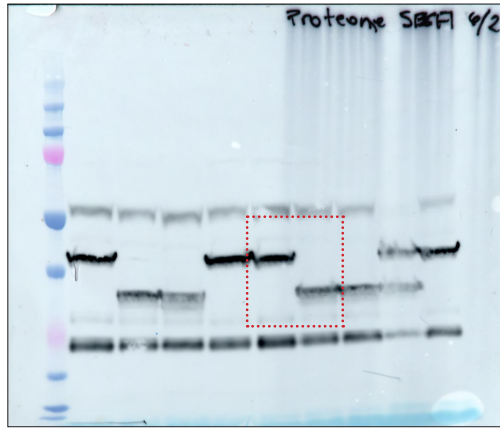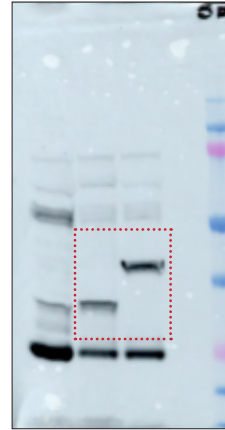

WB:  $\alpha$  Tubulin

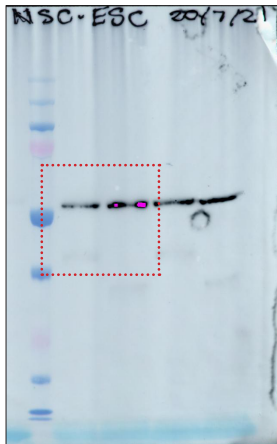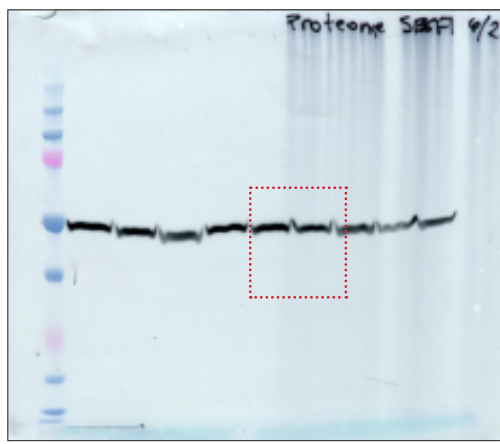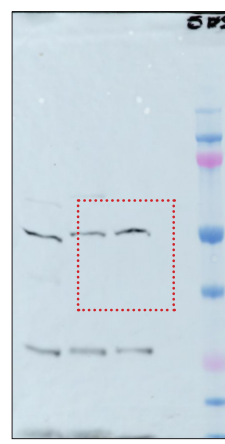

NSCs

Testes (P22)  
used in proteome analysis

Trachea  
(P23)
