# Supplementary material for: Nucleo-cytoplasmic shuttling of splicing factor SRSF1 is required for development and cilia function
Source: eLife journal article supplement (doi:10.7554/elife.65104), 2021-08-02
Supplement: supp [file elife-65104-supp-v1.zip]

Figure 3 - figure supplement 1

(A)

Ependymal cilia

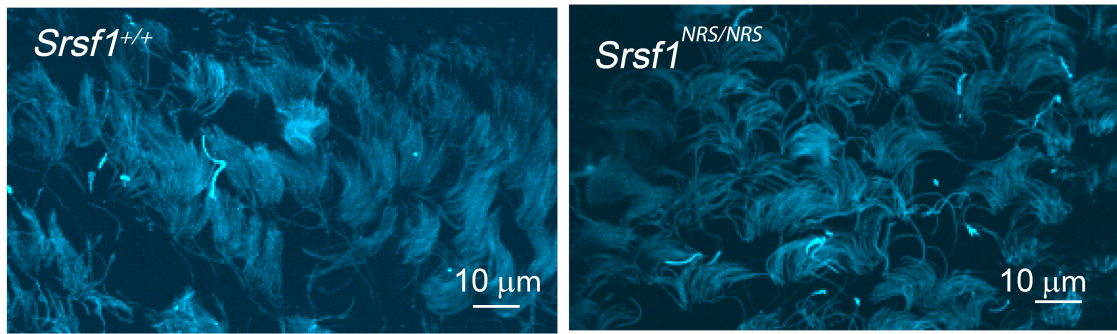

ARL13B-Cerulean

(B)

Choroid plexus (CP)

Cilia of CP

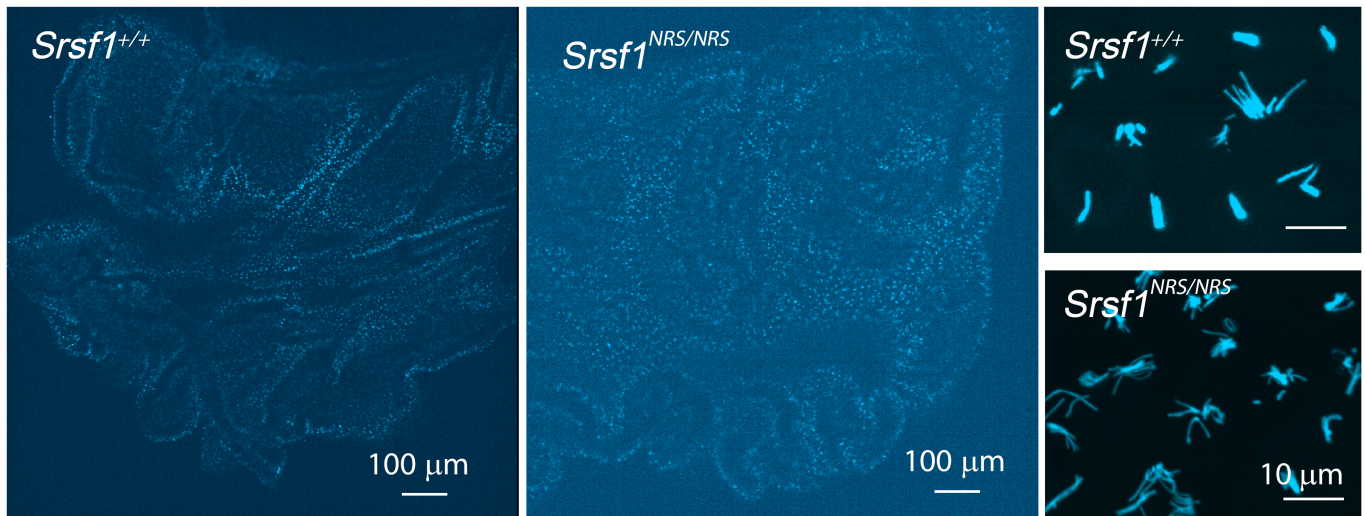

ARL13B-Cerulean
