# Supplementary figures and images for: Nucleo-cytoplasmic shuttling of splicing factor SRSF1 is required for development and cilia function
Source: eLife journal article supplement (doi:10.7554/elife.65104), 2021-08-02

Figure 5 - figure supplement 3

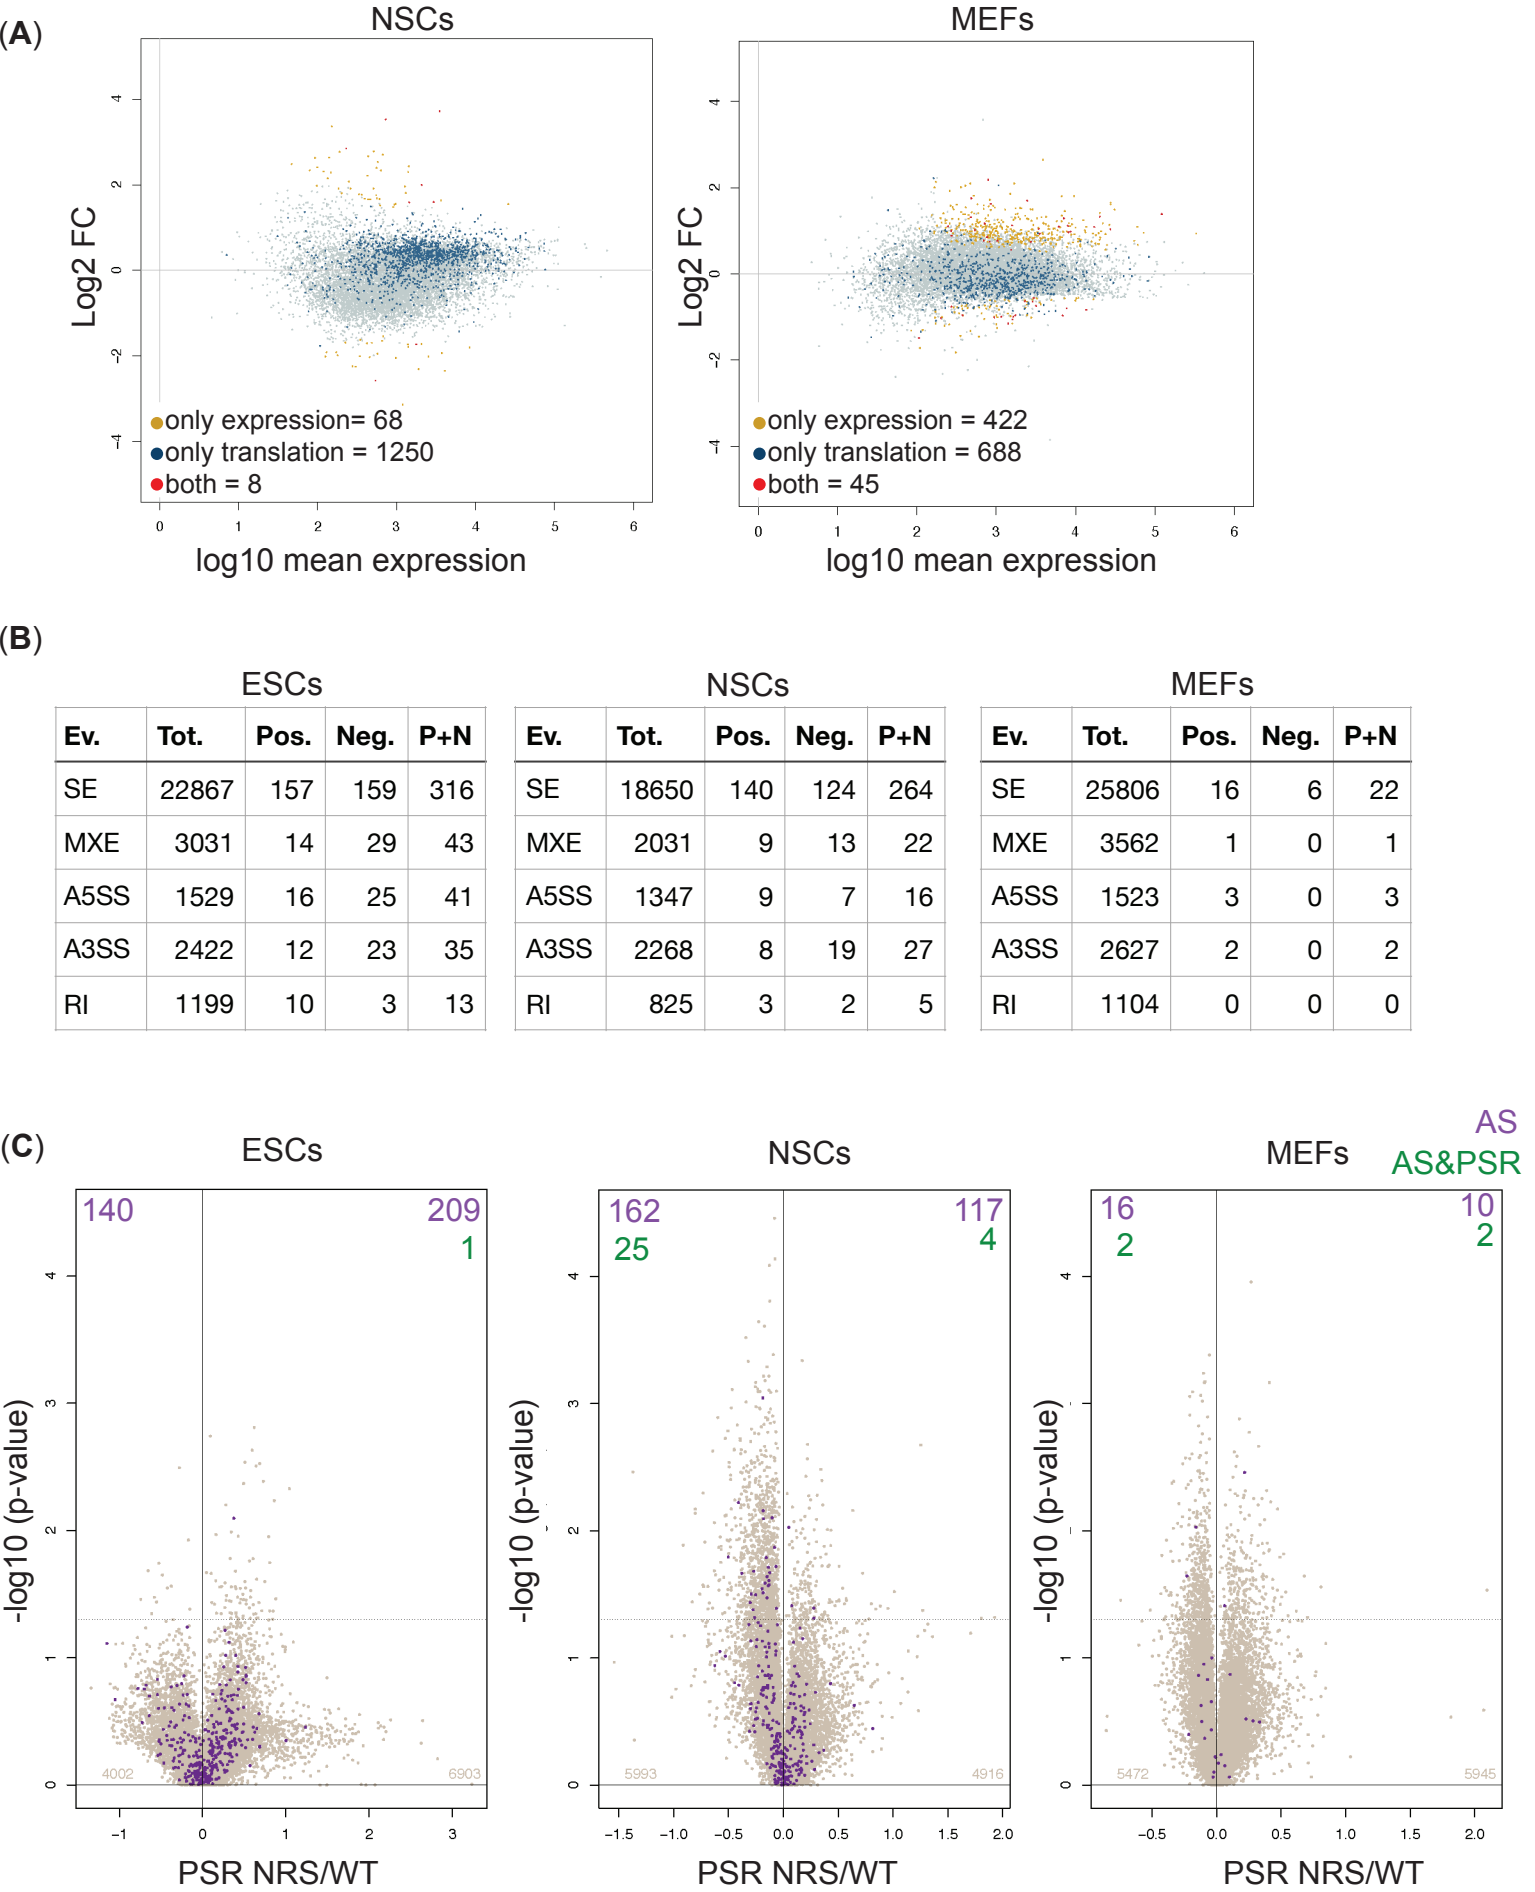

Supplement: supp [file elife-65104-supp-v1.zip]

Figure 5 - figure supplement 2

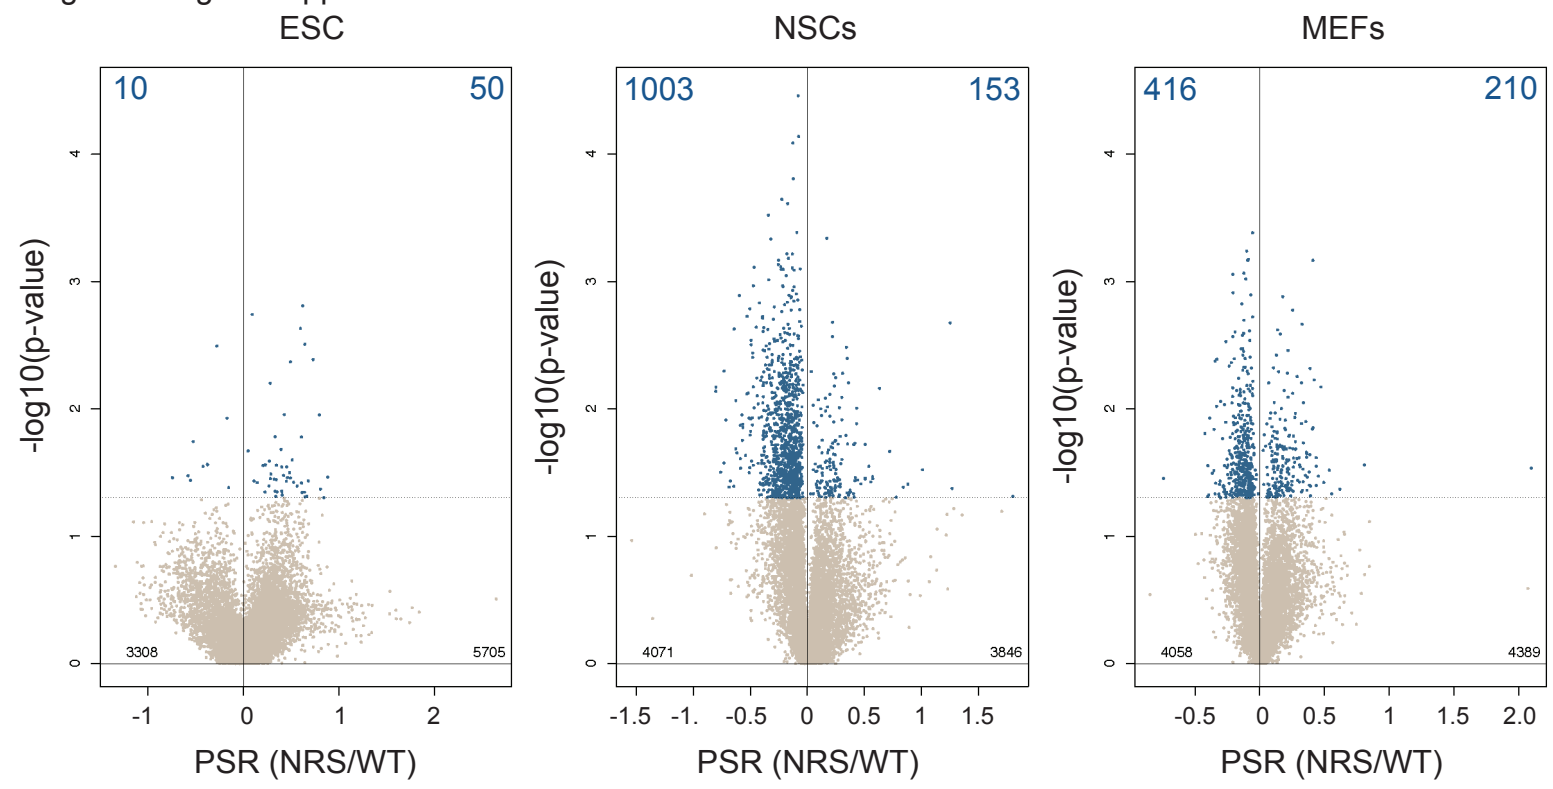

Supplement: supp [file elife-65104-supp-v1.zip]

Figure 1 - figure supplement 3

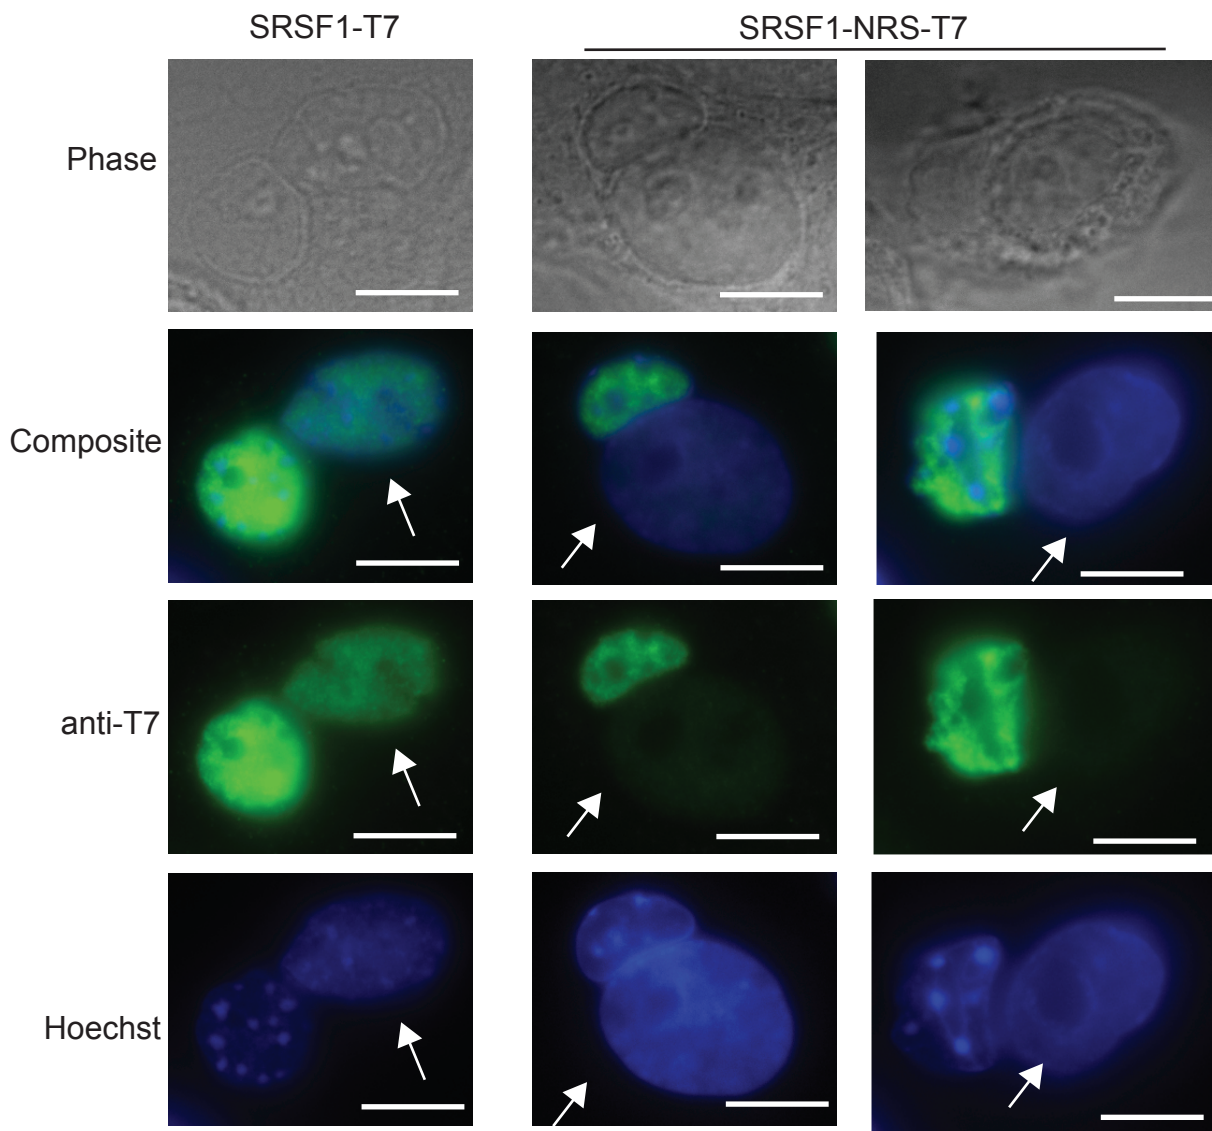

Supplement: supp [file elife-65104-supp-v1.zip]

Figure 5 - figure supplement 1

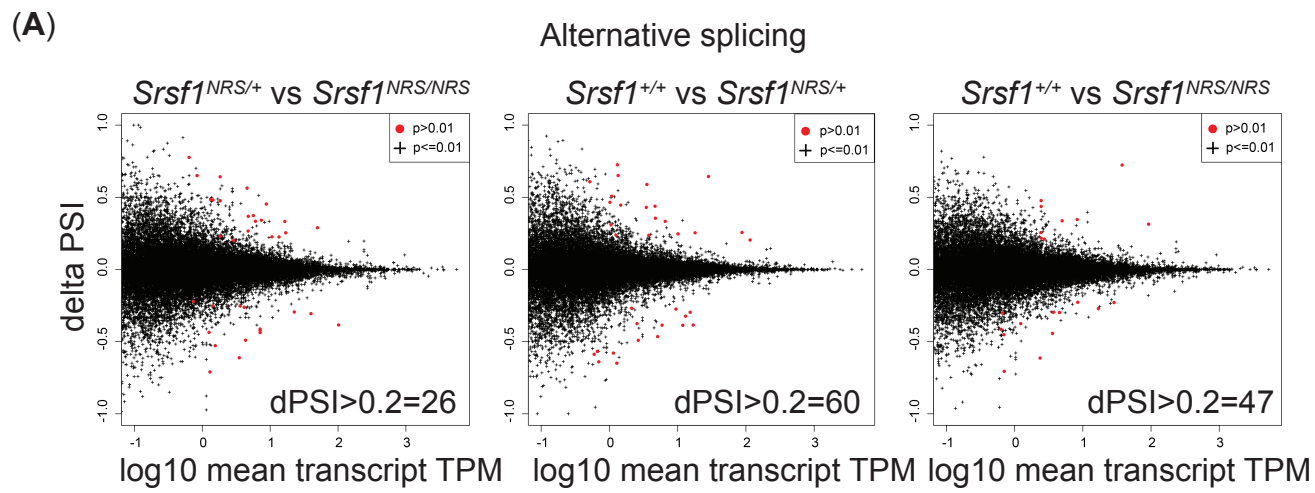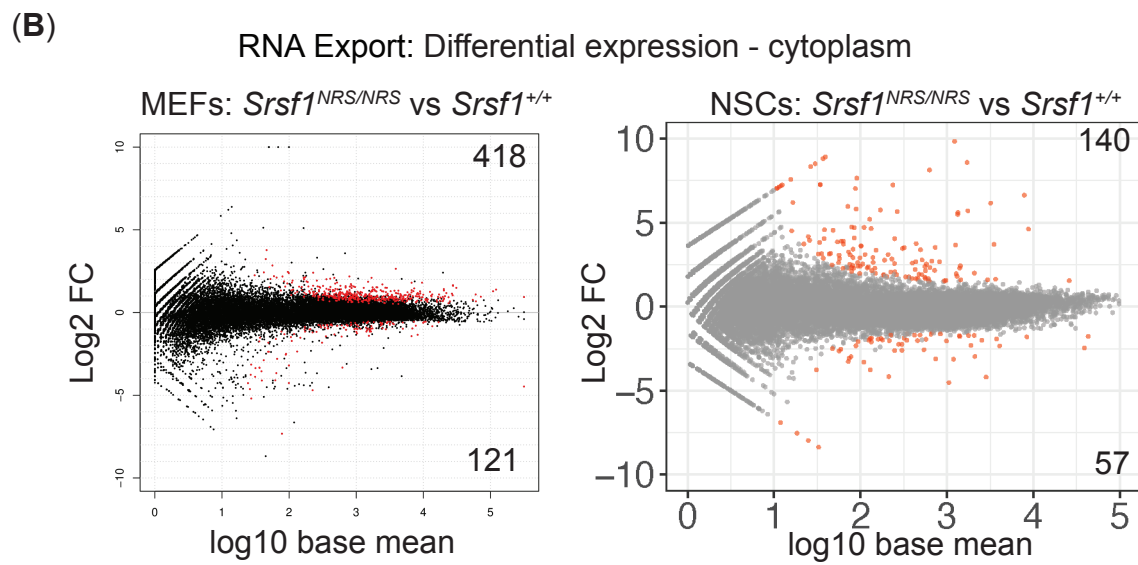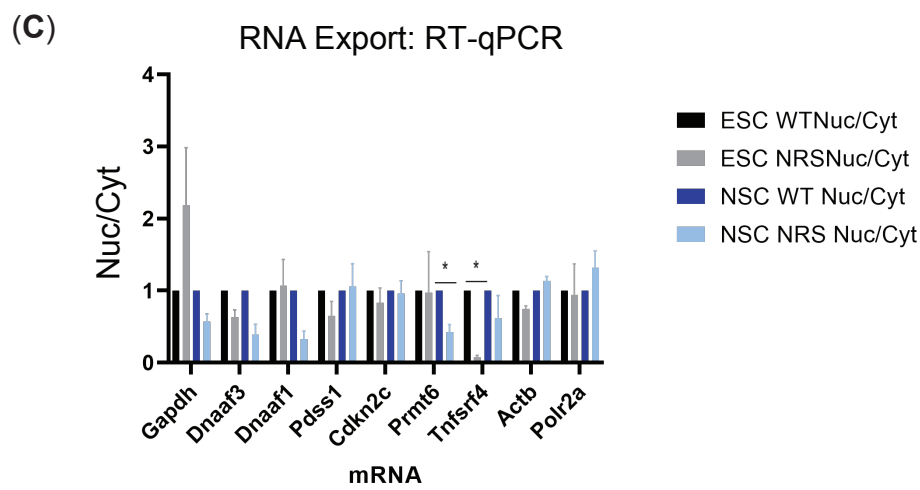

Supplement: supp [file elife-65104-supp-v1.zip]

Figure 1 - figure supplement 2

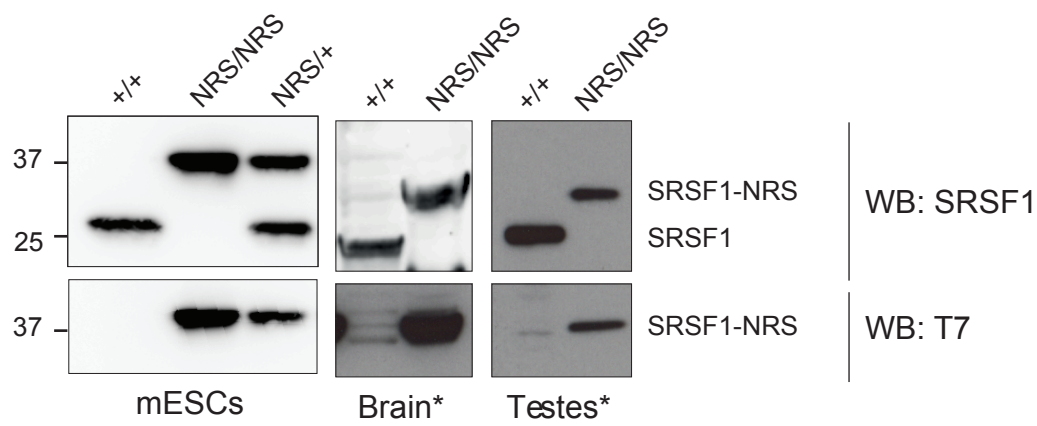

Supplement: supp [file elife-65104-supp-v1.zip]

Figure 4 - figure supplement 1

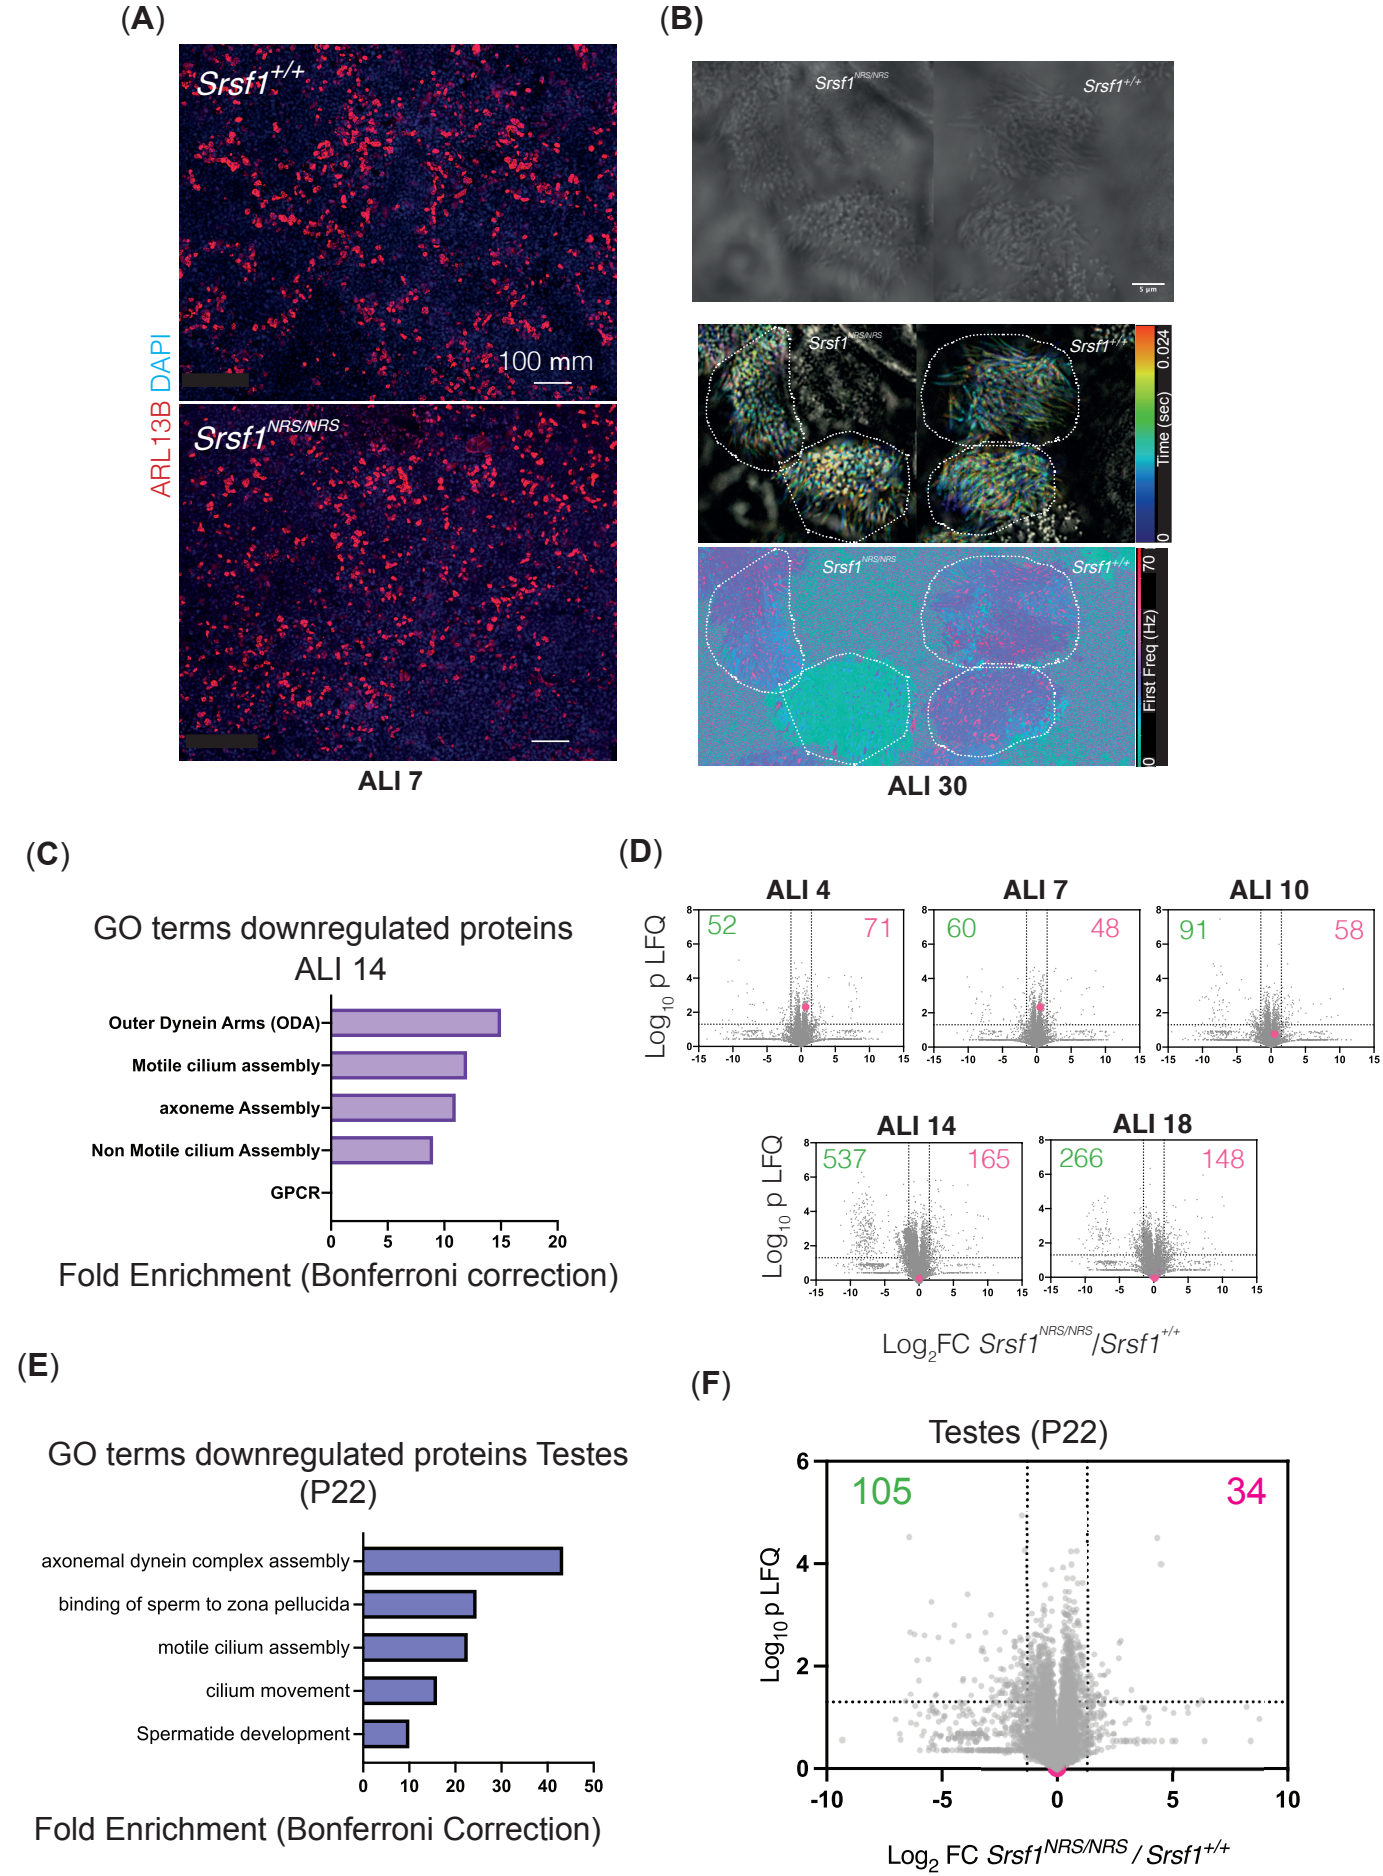

Supplement: supp [file elife-65104-supp-v1.zip]

Figure 1 - Figure supplement 1

(A) *Srsf1*<sup>+</sup>

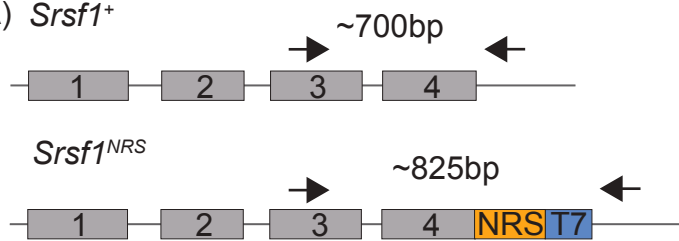

(B)

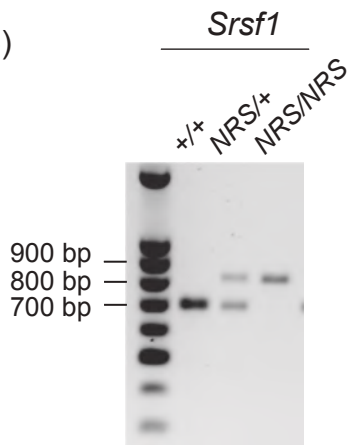

Supplement: supp [file elife-65104-supp-v1.zip]
